# Supplementary material for: A NAC Triad Mediates Plant Immunity by Negatively Regulating N-Hydroxy Pipecolic Acid Biosynthesis
Source: Research Square preprint supplement (doi:10.21203/rs.3.rs-3133457/v1), 2023-07-24
Supplement: Supplementary file 1 [file 8cf574384909d36c2e376fc2.xlsx]

## Sheet: Table S1
SI Appendix Table S1 Identification of differently expressed proteins in the pNHP plants using label-free proteomic analysis
ID	Annotation	WT-1	WT-2	WT-3	pNHP1-1	pNHP1-2	pNHP1-3	pNHP2-1	pNHP2-2	pNHP2-3	WT-means	pNHP1-means	pNHP2-means	pNHP1/WT	pNHP1/WT p-value	pNHP2/WT	pNHP2/WT p-value
AT5G64120	Peroxidase	0.01	0.01	0.01	104.7	233	242.1	99	132.9	88.2	0.01	193.267	106.7	19326.7	0.0120959	10670	0.00137349
AT2G04550	Protein-tyrosine-phosphatase IBR5	0.01	0.01	0.01	142.7	206.1	170	112.7	103.1	165.4	0.01	172.933	127.067	17293.3	0.000708493	12706.7	0.00279178
AT5G64200	Serine/arginine-rich splicing factor SC35	0.01	0.01	0.01	158.9	205.4	147.7	133.4	95.6	159	0.01	170.667	129.333	17066.7	0.000642268	12933.3	0.00216549
AT3G20250	Pumilio 5	0.01	0.01	0.01	135.2	205.1	167.9	122.2	103.1	166.5	0.01	169.4	130.6	16940	0.0011048	13060	0.00224633
AT4G34270	TIP41-like protein	0.01	0.01	0.01	183.7	124.5	198.8	113.1	142.1	137.9	0.01	169	131.033	16900	0.00173117	13103.3	0.000132231
AT4G29520	Nucleophosmin	0.01	0.01	0.01	120.8	221.9	142.1	134.6	112.9	167.6	0.01	161.6	138.367	16160	0.00629103	13836.7	0.000960935
AT1G62810	Primary amine oxidase	0.01	0.01	0.01	173.4	177	133.2	140.5	133.5	142.3	0.01	161.2	138.767	16120	0.000328425	13876.7	8.3802e-07
AT3G51330	Eukaryotic aspartyl protease family protein	0.01	0.01	0.01	132.4	176	170.3	133.2	144.9	143.1	0.01	159.567	140.4	15956.7	0.000309153	14040	2.69144e-06
AT5G45500	RNI-like superfamily protein	0.01	0.01	0.01	250.2	102.8	123.9	93.4	102.8	226.9	0.01	158.967	141.033	15896.7	0.0259603	14103.3	0.0305535
AT4G22285	Ubiquitin C-terminal hydrolases superfamily protein	0.01	0.01	0.01	225.1	95.9	154.8	162.2	163.8	98.2	0.01	158.6	141.4	15860	0.0131938	14140	0.00281798
AT3G16460	Jacalin-related lectin 34	0.01	0.01	0.01	128.4	223	121.3	129.2	147.2	150.9	0.01	157.567	142.433	15756.7	0.00860806	14243.3	2.89963e-05
AT5G58430	Exocyst complex component EXO70B1	0.01	0.01	0.01	164.2	186.1	117.8	154.1	176.4	101.4	0.01	156.033	143.967	15603.3	0.00149434	14396.7	0.00293303
AT3G08950	Protein SCO1 homolog 1, Mitochondrial	0.01	0.01	0.01	143.9	159.2	159.1	134.1	116.1	187.5	0.01	154.067	145.9	15406.7	7.06164e-06	14590	0.00243674
AT5G62630	HIPL2 protein	0.01	0.01	0.01	139.5	139	182	141.7	155.1	142.7	0.01	153.5	146.5	15350	0.000421332	14650	4.46887e-06
AT5G25440	Protein kinase superfamily protein	0.01	0.01	0.01	204.6	94.7	160.5	169.2	161.2	109.9	0.01	153.267	146.767	15326.7	0.00865044	14676.7	0.00138892
AT2G15390	Probable fucosyltransferase 4	0.01	0.01	0.01	137.7	128.9	192.3	135.2	208.6	97.1	0.01	152.967	146.967	15296.7	0.00152059	14696.7	0.0108952
AT3G44600	Peptidyl-prolyl cis-trans isomerase CYP71	0.01	0.01	0.01	133.8	199.6	124.9	135.2	142	164.5	0.01	152.767	147.233	15276.7	0.00291571	14723.3	7.662e-05
AT5G54860	Probable folate-biopterin transporter 4	0.01	0.01	0.01	157.8	168.1	130.5	136.8	156.4	150.4	0.01	152.133	147.867	15213.3	0.000171171	14786.7	1.40439e-05
AT2G25520	Probable sugar phosphate/phosphate translocator At2g25520	0.01	0.01	0.01	155.5	146.2	153.4	139.1	178.2	127.5	0.01	151.7	148.267	15170	7.11005e-07	14826.7	0.000640704
AT2G03120	Homologous to Signal Peptide Peptidases	0.01	0.01	0.01	207	97.5	147.9	151	194.5	102.2	0.01	150.8	149.233	15080	0.00887044	14923.3	0.00500051
AT3G13070	Putative DUF21 domain-containing protein At3g13070, Chloroplastic	0.01	0.01	0.01	189.5	137.3	124.8	147.4	120.7	180.3	0.01	150.533	149.467	15053.3	0.00161104	14946.7	0.000973379
AT5G40780	Lysine histidine transporter 1	0.01	0.01	0.01	135.9	154.5	160.2	157.4	151.9	140.2	0.01	150.2	149.833	15020	3.36324e-05	14983.3	7.81812e-06
AT3G25010	Receptor like protein 41	0.01	0.01	0.01	143.8	159.8	144.4	159.7	145.8	146.5	0.01	149.333	150.667	14933.3	8.99815e-06	15066.7	4.83731e-06
AT2G01410	NHL domain-containing protein	0.01	0.01	0.01	148.7	141.9	152.2	160.3	135.2	161.7	0.01	147.6	152.4	14760	1.05419e-06	15240	5.9848e-05
AT4G13920	Receptor-like protein 50	0.01	0.01	0.01	181.1	129.3	131.3	162.5	140.8	155.1	0.01	147.233	152.8	14723.3	0.000965646	15280	1.79071e-05
AT2G39260	Regulator of nonsense transcripts UPF2	0.01	0.01	0.01	157.9	142	141.2	177.7	137.2	144.1	0.01	147.033	153	14703.3	1.11298e-05	15300	0.00025666
AT2G22300	Calmodulin-binding transcription activator 3	0.01	0.01	0.01	128	164.5	148.1	135.4	143.2	180.7	0.01	146.867	153.1	14686.7	0.00015472	15310	0.0003953
AT1G34750	Probable protein phosphatase 2C 10	0.01	0.01	0.01	111.8	199.9	128.6	151.3	131.4	177	0.01	146.767	153.233	14676.7	0.00556405	15323.3	0.000314655
AT4G00710	Serine/threonine-protein kinase BSK3	0.01	0.01	0.01	108.6	188.3	137.4	198.9	128.1	138.7	0.01	144.767	155.233	14476.7	0.00341606	15523.3	0.00214505
AT5G42830	HXXXD-type acyl-transferase family protein	0.01	0.01	0.01	136.3	152.3	145.1	150.3	151.2	164.9	0.01	144.567	155.467	14456.7	6.2524e-06	15546.7	5.08414e-06
AT4G15610	CASP-like protein 1D1	0.01	0.01	0.01	145.4	133.7	150.6	175.2	141.8	153.4	0.01	143.233	156.8	14323.3	8.82208e-06	15680	8.88969e-05
AT3G14920	Peptide-N4-(N-acetyl-beta-glucosaminyl)asparagine amidase A protein	0.01	0.01	0.01	147.7	134	148	160.2	118	192.1	0.01	143.233	156.767	14323.3	6.43743e-06	15676.7	0.00186781
AT4G27450	Aluminum induced protein with YGL and LRDR motifs;	0.01	0.01	0.01	135.3	155.6	137.1	163.2	155.9	152.9	0.01	142.667	157.333	14266.7	2.53123e-05	15733.3	8.54912e-07
AT3G57780	Nucleolar-like protein	0.01	0.01	0.01	156.2	129.7	141.8	200.7	115.7	156	0.01	142.567	157.467	14256.7	4.90555e-05	15746.7	0.00303602
AT4G28570	Long-chain-alcohol oxidase FAO4B	0.01	0.01	0.01	168.3	123.6	134.3	163.4	154.2	156.1	0.01	142.067	157.9	14206.7	0.000457999	15790	5.95708e-07
AT2G41410	Probable calcium-binding protein CML35	0.01	0.01	0.01	185.4	80	160	172.5	154	148.1	0.01	141.8	158.2	14180	0.01112	15820	2.7566e-05
AT3G26170	Putative cytochrome P450	0.01	0.01	0.01	168.3	127.8	128.8	150	176.7	148.4	0.01	141.633	158.367	14163.3	0.00044517	15836.7	6.62201e-05
AT2G14835	Expressed protein	0.01	0.01	0.01	155.3	133.8	133.3	150.8	194.9	132	0.01	140.8	159.233	14080	4.14876e-05	15923.3	0.00103112
AT1G26380	Berberine bridge enzyme-like 3	0.01	0.01	0.01	96.9	160.4	163.4	138.4	184	156.9	0.01	140.233	159.767	14023.3	0.00294562	15976.7	0.000270655
AT5G22380	NAC-domain protein 90	0.01	0.01	0.01	166.9	137.7	115.9	172	140.4	167.1	0.01	140.167	159.833	14016.7	0.000688944	15983.3	8.33729e-05
AT2G44240	NEP-interacting protein	0.01	0.01	0.01	132.1	144	144.2	169.1	153.9	156.6	0.01	140.1	159.867	14010	3.96813e-06	15986.7	4.39009e-06
AT4G25000	Alpha-amylase 1	0.01	0.01	0.01	144.8	120.3	153.4	130.1	180.2	171.2	0.01	139.5	160.5	13950	0.000148184	16050	0.00048137
AT1G55910	Zinc transporter 11	0.01	0.01	0.01	140.6	134.3	142.9	173.7	131.1	177.4	0.01	139.267	160.733	13926.7	6.95044e-07	16073.3	0.000414002
AT3G51980	ARM repeat superfamily protein	0.01	0.01	0.01	146.5	135.9	134.1	155.8	195	132.8	0.01	138.833	161.2	13883.3	3.59897e-06	16120	0.000889498
AT4G09750	NAD(P)-binding Rossmann-fold superfamily protein	0.01	0.01	0.01	141.3	138.3	130.1	226.8	131.1	132.4	0.01	136.567	163.433	13656.7	2.15746e-06	16343.3	0.00670885
AT1G65650	Ubiquitin carboxyl-terminal hydrolase	0.01	0.01	0.01	225.4	84.9	98	120.2	278.2	93.4	0.01	136.1	163.933	13610	0.0385132	16393.3	0.0467166
AT3G23670	Kinesin-like protein KIN-12B	0.01	0.01	0.01	208.1	64.2	135.3	97.5	199.9	195	0.01	135.867	164.133	13586.7	0.0307776	16413.3	0.00791958
AT3G01150	PTB1	0.01	0.01	0.01	136.5	136.8	132.5	131.7	188.5	174	0.01	135.267	164.733	13526.7	6.61177e-08	16473.3	0.000640512
AT5G64260	Protein EXORDIUM-like 2	0.01	0.01	0.01	139.6	138.4	125.2	169.2	176	151.6	0.01	134.4	165.6	13440	8.26462e-06	16560	2.20089e-05
AT2G17760	Aspartyl protease family protein 1	0.01	0.01	0.01	159.5	153.3	88.7	177.6	172.2	148.7	0.01	133.833	166.167	13383.3	0.00409941	16616.7	4.78446e-05
AT5G61210	SNP33	0.01	0.01	0.01	129.1	128.6	135.8	167.2	160.2	179.1	0.01	131.167	168.833	13116.7	5.87358e-07	16883.3	6.79308e-06
AT4G36090	ALKBH9C, ATALKBH9C	0.01	0.01	0.01	169.7	112.1	104.6	177.9	181.4	154.2	0.01	128.8	171.167	12880	0.00331622	17116.7	3.66351e-05
AT2G39420	Alpha/beta-Hydrolases superfamily protein	0.01	0.01	0.01	125.8	132	128	167.5	116.2	230.4	0.01	128.6	171.367	12860	2.37694e-07	17136.7	0.00656575
AT1G02360	Chitinase family protein	0.01	0.01	0.01	139.1	151.3	83.7	153.6	214.5	157.7	0.01	124.7	175.267	12470	0.00389532	17526.7	0.000874085
AT1G69295	PLASMODESMATA CALLOSE-BINDING PROTEIN 4	0.01	0.01	0.01	131	95.7	146.2	178.4	167.5	181.2	0.01	124.3	175.7	12430	0.00114576	17570	1.91329e-06
AT4G10960	UDP-glucose 4-epimerase 5	0.01	0.01	0.01	104.4	113.4	150.8	173.8	185.5	172.1	0.01	122.867	177.133	12286.7	0.000983379	17713.3	1.9115e-06
AT4G10330	Glycine-rich protein	0.01	0.01	0.01	151.8	80.7	132.4	166.8	220.9	147.4	0.01	121.633	178.367	12163.3	0.00458802	17836.7	0.00125674
AT5G45380	DUR3	0.01	0.01	0.01	135.4	98.2	126.1	163.9	164.6	211.8	0.01	119.9	180.1	11990	0.000428152	18010	0.000342253
AT1G65790	Receptor-like serine/threonine-protein kinase SD1-7	0.01	0.01	0.01	202.6	78.5	76.3	83.5	257.2	201.9	0.01	119.133	180.867	11913.3	0.0462057	18086.7	0.0242301
AT5G60210	ROP interactive partner 5	0.01	0.01	0.01	160.5	98.8	97.3	192.9	143.9	206.6	0.01	118.867	181.133	11886.7	0.0046566	18113.3	0.000680598
AT1G65040	ERAD-associated E3 ubiquitin-protein ligase HRD1B	0.01	0.01	0.01	153.6	75.9	123.5	191.3	177.5	178.1	0.01	117.667	182.3	11766.7	0.00650856	18230	2.22572e-06
AT4G37430	CYP91A2	0.01	0.01	0.01	127.4	126.4	99.1	146.9	242.1	158.1	0.01	117.633	182.367	11763.3	0.000222299	18236.7	0.00372027
AT1G14870	PCR2	0.01	0.01	0.01	122.3	82.5	132.1	179.4	183.4	200.2	0.01	112.3	187.667	11230	0.00177517	18766.7	7.9161e-06
AT2G26400	Acireductone dioxygenase 3	0.01	0.01	0.01	97.6	148.8	90.3	210	197.2	156.1	0.01	112.233	187.767	11223.3	0.0036592	18776.7	0.000321156
AT1G73260	Kunitz trypsin inhibitor 1	0.01	0.01	0.01	118.3	102.8	111.5	205.3	182.8	179.2	0.01	110.867	189.1	11086.7	1.59104e-05	18910	2.06166e-05
AT4G01130	GDSL esterase/lipase At4g01130	0.01	0.01	0.01	113.4	81.9	123.9	153.5	298.8	128.6	0.01	106.4	193.633	10640	0.001084	19363.3	0.0218044
AT1G04280	P-loop containing nucleoside triphosphate hydrolases superfamily protein	0.01	0.01	0.01	86.9	108.9	108.5	234.2	163.1	198.3	0.01	101.433	198.533	10143.3	0.000152911	19853.3	0.000639318
AT5G11920	Beta-fructofuranosidase, Insoluble isoenzyme CWINV6	0.6	0.01	0.01	148.4	139.3	143.5	167.9	165.1	135.3	0.206667	143.733	156.1	695.484	6.82031e-07	755.323	0.000116857
AT4G18253	Receptor Serine/Threonine kinase-like protein	0.01	0.01	8.6	140.5	146	130.3	156.6	174.1	144	2.87333	138.933	158.233	48.3527	1.49266e-05	55.0696	7.16277e-05
AT1G09932	Phosphoglycerate mutase family protein	8.3	0.01	0.01	110.1	109	131.4	195.6	180.7	165	2.77333	116.833	180.433	42.1274	0.000126995	65.0601	4.34281e-05
AT3G13080	MRP3	0.01	0.01	10.9	163.8	156.8	127.9	129.1	134.4	177.2	3.64	149.5	146.9	41.0714	0.000228015	40.3571	0.00079127
AT5G43910	PfkB-like carbohydrate kinase family protein	0.01	11	0.01	150.9	135.9	135.1	155.1	144.6	167.4	3.67333	140.633	155.7	38.2849	2.66658e-05	42.3866	3.56896e-05
AT5G18470	Curculin-like (Mannose-binding) lectin family protein	2.4	5.5	3.9	146.8	126.8	138.8	159.3	166.1	150.4	3.93333	137.467	158.6	34.9492	2.22752e-05	40.322	4.80187e-06
AT1G67550	Urease	0.01	0.01	14.2	157.1	113.8	162.1	139.4	149.5	164	4.74	144.333	150.967	30.4501	0.00096164	31.8495	6.90031e-05
AT4G10500	Protein DMR6-LIKE OXYGENASE 1	5.8	5	0.01	144.6	86.7	92.2	183.1	206.6	175.9	3.60333	107.833	188.533	29.926	0.00492252	52.3219	4.012e-05
AT5G24530	Protein DOWNY MILDEW RESISTANCE 6	3.6	5.9	5	143.6	138.5	148.7	152.8	156.7	145.2	4.83333	143.6	151.567	29.7103	1.34097e-06	31.3586	1.8105e-06
AT1G30900	Vacuolar-sorting receptor 6	4.8	4.7	5.3	142.9	141	147.4	159.6	148.5	145.8	4.93333	143.767	151.3	29.1419	2.13192e-07	30.6689	4.14907e-06
AT1G09770	Cell division cycle 5-like protein	0.01	0.01	17.9	170.1	176.6	168.8	174.1	81.9	110.5	5.97333	171.833	122.167	28.7667	1.34423e-05	20.452	0.0140795
AT5G62560	U-box domain-containing protein 41	0.01	15.9	0.01	224.3	92.2	101	157.6	200.7	108.2	5.30667	139.167	155.5	26.2249	0.0356922	29.3028	0.00528254
AT3G09940	Monodehydroascorbate reductase 3	1.8	5.1	10	133.9	159.2	148.3	159.1	130.3	152.2	5.63333	147.133	147.2	26.1183	5.17027e-05	26.1302	9.5529e-05
AT1G68300	Adenine nucleotide alpha hydrolases-like superfamily protein	8.7	0.01	8.9	138.6	147	157.6	154.5	142.9	141.7	5.87	147.733	146.367	25.1675	2.20245e-05	24.9347	9.73148e-06
AT5G26340	STP13	4.6	8.2	2.8	106.2	126.5	140.4	194.1	140	177.3	5.2	124.367	170.467	23.9167	0.000290356	32.7821	0.000503607
AT5G38900	Thioredoxin superfamily protein	0.01	0.01	17.1	127.8	118	145.7	157.3	170.8	163.3	5.70667	130.5	163.8	22.868	0.00022893	28.7033	2.15807e-05
AT5G45490	Probable disease resistance protein At5g45490	0.01	0.01	20.5	200.7	111.2	129.7	158.1	154.6	125.2	6.84	147.2	145.967	21.5205	0.00753579	21.3402	0.000367258
AT3G28540	AAA-ATPase At3g28540	9.5	10.8	0.01	138.5	165.9	123	146.3	149.1	156.9	6.77	142.467	150.767	21.0438	0.000475187	22.2698	6.47978e-06
AT5G44390	Berberine bridge enzyme-like 25	0.01	18.6	0.01	78.6	136.7	151.6	155.2	174.2	184.9	6.20667	122.3	171.433	19.7046	0.0073732	27.6208	0.000101459
AT4G36750	Probable NAD(P)H dehydrogenase (quinone) FQR1-like 2	0.01	24.6	0.01	155.9	144	166	167.3	111.7	130.5	8.20667	155.3	136.5	18.9236	0.000143618	16.6328	0.00216648
AT2G29190	Pumilio homolog 2	12.7	12.7	0.01	152.2	169	157.7	147	124.9	123.8	8.47	159.633	131.9	18.8469	2.0355e-05	15.5726	0.000140743
AT2G43570	CHI	8	6.8	6.8	127.6	134.6	129	156.4	167.8	163.1	7.2	130.4	162.433	18.1111	5.82291e-07	22.5602	1.26944e-06
AT4G21810	Derlin-2.1	0.01	23.1	0.01	125	156.5	135.8	124.4	160.3	174.9	7.70667	139.1	153.2	18.0493	0.000398667	19.8789	0.000992193
AT2G14610	Pathogenesis-related protein 1	8.3	7.3	7.2	117.8	157.3	133	157.7	153	158.3	7.6	136.033	156.333	17.8991	0.000366953	20.5702	1.05244e-07
AT1G13750	ARABIDOPSIS THALIANA PURPLE ACID PHOSPHATASE 1	13.2	0.01	14	135.3	170.5	121.7	219.3	113.4	112.7	9.07	142.5	148.467	15.7111	0.000935947	16.369	0.0174829
AT3G48090	Protein EDS1	15.9	11.9	1.8	160.9	148.3	147.9	144.2	126.6	142.4	9.86667	152.367	137.733	15.4426	1.84513e-05	13.9595	5.25298e-05
AT1G13470	Protein of unknown function (DUF1262)	17.3	6.8	4.2	149.9	134.1	148.9	158	139.4	141.5	9.43333	144.3	146.3	15.2968	3.16952e-05	15.5088	4.30424e-05
AT1G28580	GDSL esterase/lipase At1g28580	29	0.01	0.01	156.3	124.1	161.4	155.3	151	122.8	9.67333	147.267	143.033	15.224	0.000816251	14.7864	0.000686611
AT3G20410	Calcium-dependent protein kinase 9	0.01	0.01	32.4	119	206	167.7	120.8	136.3	117.8	10.8067	164.233	124.967	15.1974	0.00498845	11.5638	0.000731943
AT4G04570	Cysteine-rich receptor-like protein kinase 40	16.5	0.01	12.4	138.4	134.8	141	147.5	157.6	151.8	9.63667	138.067	152.3	14.3272	1.68544e-05	15.8042	1.57292e-05
AT4G20110	VACUOLAR SORTING RECEPTOR 7	7.4	9.8	10.9	145.9	133.8	122.7	141.6	159.8	168.1	9.36667	134.133	156.5	14.3203	5.12636e-05	16.7082	4.87697e-05
AT1G09070	Protein SRC2 homolog	6.7	16.2	6.8	147.2	142.8	126.8	144.3	147.8	161.4	9.9	138.933	151.167	14.0337	4.96155e-05	15.2694	2.0509e-05
AT4G13510	Ammonium transporter	8.1	9.6	11.1	154.3	86.8	151.2	175.8	148.9	154.3	9.6	130.767	159.667	13.6215	0.0053179	16.6319	5.40144e-05
AT5G39050	Phenolic glucoside malonyltransferase 1	0.01	10.9	18	148.1	109.3	130.8	157.7	166.6	158.5	9.63667	129.4	160.933	13.4279	0.000639263	16.7001	1.42429e-05
AT3G57260	Beta-1,3-glucanase 2	9.9	10.5	10.3	139.3	131.1	140.6	156.6	163.3	138.4	10.2333	137	152.767	13.3876	1.82312e-06	14.9283	4.37743e-05
AT2G18660	EG45-like domain containing protein 2	10.6	10.6	9.9	128.2	142.4	138.7	146.7	155.6	157.3	10.3667	136.433	153.2	13.1608	7.75949e-06	14.7781	1.69346e-06
AT4G02330	Probable pectinesterase/pectinesterase inhibitor 41	0.01	18.6	14.4	148.3	136.6	136.9	146.9	154.4	143.9	11.0033	140.6	148.4	12.7779	4.51809e-05	13.4868	2.84851e-05
AT4G04860	Derlin-2.2	0.01	0.01	32.5	207.4	114.1	89.2	85.5	189.9	181.4	10.84	136.9	152.267	12.6292	0.028428	14.0467	0.0158659
AT1G75040	Pathogenesis-related protein 5	11.8	10	9.6	129	137.1	129.9	152.3	157.8	162.6	10.4667	132	157.567	12.6115	1.35403e-06	15.0541	1.10806e-06
AT5G62390	BAG family molecular chaperone regulator 7	33.6	0.01	0.01	124	143.6	150.5	129.4	145.6	173.3	11.2067	139.367	149.433	12.436	0.000732239	13.3343	0.00124979
AT2G33580	Protein LYK5	14.4	0.01	16.3	141.4	78.8	159.6	155	165.3	169.2	10.2367	126.6	163.167	12.3673	0.00963576	15.9394	2.13422e-05
AT2G26560	Patatin-like protein 2	22.8	4.9	6.9	147.4	153.4	124.1	140	159.7	140.8	11.5333	141.633	146.833	12.2803	0.00025117	12.7312	9.42111e-05
AT4G23140	Receptor-like protein kinase	10.2	10.9	14.7	158.3	154.7	124.2	132.3	149.9	144.8	11.9333	145.733	142.333	12.2123	0.000253571	11.9274	1.75985e-05
AT5G55050	GDSL esterase/lipase At5g55050	18.2	0.01	14.3	167.5	78.2	149.3	167.9	186.4	118.3	10.8367	131.667	157.533	12.1501	0.0121916	14.5371	0.00223651
AT5G01210	HXXXD-type acyl-transferase family protein;(source:Araport11)	36.2	0.01	0.01	141.3	149.8	144.9	148.5	135.7	143.6	12.0733	145.333	142.6	12.0375	0.000413412	11.8112	0.000494153
AT1G80930	Ribosomal protein L29 family protein;(source:Araport11)	15.3	0.01	14.2	154.9	71.6	124.4	170	148.4	201.2	9.83667	116.967	173.2	11.8909	0.0124931	17.6076	0.00053081
AT4G24190	Endoplasmin homolog	12.4	13	12.2	154.4	144	133.9	143	140.8	146.2	12.5333	144.1	143.333	11.4973	2.43147e-05	11.4362	1.29587e-07
AT1G11310	MLO-like protein 2	10.2	11.7	15.2	133.6	156.5	131.9	144.9	135.3	160.6	12.3667	140.667	146.933	11.3747	9.14448e-05	11.8814	5.73542e-05
AT1G08050	T6D22.13	43.3	0.01	0.01	101.7	223.3	159	131.6	117.8	123.2	14.44	161.333	124.2	11.1727	0.0180155	8.60111	0.00184555
AT5G15400	Probable ubiquitin conjugation factor E4	15.1	13.2	10	150.3	134.7	142.7	145.7	142.2	146.1	12.7667	142.567	144.667	11.1671	1.06052e-05	11.3316	2.78198e-07
AT2G28190	Superoxide dismutase	23.5	14.9	16.4	195.9	213.9	196.9	90.8	64.7	83.1	18.2667	202.233	79.5333	11.0712	8.79688e-06	4.35401	0.00170293
AT5G46230	ABA responsive SVB family gene.	0.01	0.01	35	145.1	99.8	130	171.6	153.2	165.3	11.6733	124.967	163.367	10.7053	0.00306114	13.9949	0.000294919
AT2G30140	UDP-glycosyltransferase 87A2	9.3	15.2	13.5	143	120.4	136.3	152.4	164.4	145.4	12.6667	133.233	154.067	10.5184	6.39772e-05	12.1632	1.70075e-05
AT1G08830	Superoxide dismutase	11.4	19.5	19.9	180.6	157.2	195.6	96	118.5	101.3	16.9333	177.8	105.267	10.5	0.000152086	6.21654	0.000272482
AT5G57580	Calmodulin-binding protein 60 B	20.9	21.2	0.01	155.1	151.5	134.3	136.1	131.5	149.5	14.0367	146.967	139.033	10.4702	0.000151771	9.90501	0.00014595
AT3G51730	Saposin B domain-containing protein;(source:Araport11)	36.2	0.01	0.01	115.2	136.6	126.1	189.9	163.7	132.2	12.0733	125.967	161.933	10.4335	0.00109752	13.4125	0.00189178
AT2G32680	Receptor like protein 23	15.5	11.1	13.6	127.4	136.8	152.8	156.1	158.1	128.4	13.4	139	147.533	10.3731	7.5415e-05	11.01	0.000156504
AT4G14600	Bet1-like protein At4g14600	21.7	19.9	0.01	151.1	129.4	147.1	140.1	145.7	144.9	13.87	142.533	143.567	10.2764	0.000181511	10.3509	5.47992e-05
AT2G33630	NAD(P)-binding Rossmann-fold superfamily protein	47.6	0.01	0.01	119.5	171.5	192.4	111.6	170	87.3	15.8733	161.133	122.967	10.1512	0.0056607	7.74675	0.0214873
AT5G06830	CDK5RAP3-like protein	9.7	20	26.8	186.2	198.6	184.8	100	95.9	77.9	18.8333	189.867	91.2667	10.0814	1.34026e-05	4.84602	0.00100019
AT1G69720	Heme oxygenase 3, Chloroplastic	0.01	45	0.01	163.1	118.5	171.3	143.8	159	99.3	15.0067	150.967	134.033	10.06	0.00361686	8.93159	0.0070069
AT5G03160	DnaJ protein P58IPK homolog	17.4	21.4	0.01	125.8	145.5	118.1	139	199.2	133.7	12.9367	129.8	157.3	10.0335	0.00036705	12.1592	0.00279372
AT1G14880	Protein PLANT CADMIUM RESISTANCE 1	9.8	13.8	15.9	136.3	124.6	135.2	150.7	157.7	156.1	13.1667	132.033	154.833	10.0278	8.73361e-06	11.7595	8.77654e-07
AT3G54670	Structural maintenance of chromosomes protein 1	40.4	0.01	0.01	150	123.2	111.6	153.5	173.6	147.8	13.4733	128.267	158.3	9.52004	0.0028671	11.7491	0.000743698
AT1G65540	LETM1-like protein	17.5	10	19.9	164	156.1	122.8	148.5	134.4	126.7	15.8	147.633	136.533	9.34388	0.000527851	8.64135	6.80074e-05
AT3G52430	Lipase-like PAD4	13.1	11.4	19.2	138.7	135.4	133.9	159.4	142.7	146.2	14.5667	136	149.433	9.33638	1.59574e-06	10.2586	1.77468e-05
AT1G74210	GDPD5	12.3	0.01	33.3	153.1	139.3	130.9	146	154.4	130.5	15.2033	141.1	143.633	9.28086	0.000419598	9.44749	0.000428724
AT3G22330	DEAD-box ATP-dependent RNA helicase 53, Mitochondrial	14.4	16.6	16.4	138.7	127.7	156.3	138.3	154.2	137.5	15.8	140.9	143.333	8.91772	0.000116104	9.07173	2.02547e-05
AT1G66680	Protein-lysine N-methyltransferase At1g66680	0.01	50.2	0.01	157.9	121.9	166.8	137.3	126.1	139.9	16.74	148.867	134.433	8.89287	0.00364162	8.03067	0.0024167
AT1G08450	Calreticulin-3	18.4	11.2	17.4	128.6	143.9	144.6	142.6	137.4	156	15.6667	139.033	145.333	8.87447	2.66887e-05	9.2766	2.67741e-05
AT3G26830	Bifunctional dihydrocamalexate synthase/camalexin synthase	16.6	12.7	11.2	140.5	89.4	123.8	196.3	131.4	178	13.5	117.9	168.567	8.73333	0.00231277	12.4864	0.00132473
AT4G39680	SAP domain-containing protein	35.1	9.2	3.2	139.9	161	113	179.2	92.2	167.2	15.8333	137.967	146.2	8.71368	0.00198496	9.23368	0.0107675
AT5G23680	Sterile alpha motif (SAM) domain-containing protein;(source:Araport11)	46.1	0.01	0.01	145	124	131.7	156.7	140.2	156.4	15.3733	133.567	151.1	8.6882	0.00202997	9.82871	0.00113699
AT1G45145	Thioredoxin H5	15.7	14.2	14	131.9	127.8	120.8	163.4	159.3	152.8	14.6333	126.833	158.5	8.66743	4.38183e-06	10.8314	1.34393e-06
AT4G12290	Amine oxidase	26.9	17.2	4.9	154	118.2	140.4	155.9	172.4	110.1	16.3333	137.533	146.133	8.42041	0.000580545	8.94694	0.00274422
AT2G43620	Endochitinase At2g43620	27.5	27.4	0.01	153.9	152.1	149.3	133	130.7	126	18.3033	151.767	129.9	8.29175	0.000133782	7.09707	0.000285374
AT3G52400	Syntaxin-122	9.3	18.9	20.6	128.5	141.4	133.5	149.5	143.2	155.2	16.2667	134.467	149.3	8.26639	2.12767e-05	9.17828	1.12864e-05
AT5G47690	Binding protein	14.7	15.5	16.7	156.4	102.7	126.6	167.8	150.7	148.9	15.6333	128.567	155.8	8.22388	0.00190612	9.96588	2.05752e-05
AT2G34810	Berberine bridge enzyme-like 16	0.01	0.01	51.2	173.2	92.8	148.5	129.3	189.2	115.8	17.0733	138.167	144.767	8.09254	0.0144046	8.47911	0.0107003
AT5G58640	Selenoprotein, Rdx type;(source:Araport11)	49.1	0.01	0.01	126.8	111	156.1	181.2	151.8	124	16.3733	131.3	152.333	8.01914	0.00545397	9.30375	0.00426409
AT1G22400	UDP-glycosyltransferase 85A1	20.7	9.9	23.6	134.6	153.4	143.5	143.7	129.1	141.6	18.0667	143.833	138.133	7.96125	5.16277e-05	7.64576	4.12716e-05
AT1G23900	AP-1 complex subunit gamma-1	21.9	0.01	30.2	147.4	123	137.8	138.1	163.6	137.8	17.37	136.067	146.5	7.83343	0.000491317	8.43408	0.000482907
AT1G21630	Calcium-binding EF hand family protein	15.1	25	18.1	154.1	146.3	154.7	139.8	132.8	114.1	19.4	151.7	128.9	7.81959	4.92748e-06	6.64433	0.000182866
AT1G10522	Protein PLASTID REDOX INSENSITIVE 2, Chloroplastic	0.01	0.01	59.8	103.8	192.6	169.3	87.1	145.5	142	19.94	155.233	124.867	7.78502	0.015195	6.26212	0.0187918
AT4G08850	MDIS1-interacting receptor like kinase 2	23	20	14.6	145.5	140.2	157.4	146.5	151.6	101.1	19.2	147.7	133.067	7.69271	2.21125e-05	6.93056	0.00217771
AT4G38550	Arabidopsis phospholipase-like protein (PEARLI 4) family	14.1	20.2	22.3	155.6	138.2	138.9	145.5	128.4	136.7	18.8667	144.233	136.867	7.64488	3.52205e-05	7.25442	2.82297e-05
AT1G28110	Serine carboxypeptidase-like 45	18.8	20.6	15.6	151.2	130.5	129.8	164.8	138.2	130.4	18.3333	137.167	144.467	7.48182	7.76359e-05	7.88	0.000276847
AT5G44650	Ycf3-interacting protein 1, Chloroplastic	19.1	0.01	31.7	148.8	120.2	109.6	156.7	98.2	215.6	16.9367	126.2	156.833	7.45129	0.00183918	9.25999	0.016355
AT1G10580	Transducin/WD40 repeat-like superfamily protein;(source:Araport11)	56.4	0.01	0.01	167.5	113.8	138.1	160.8	119.4	144.1	18.8067	139.8	141.433	7.43353	0.0076898	7.52038	0.00534403
AT5G52540	Keratin-associated protein, Putative (DUF819)	17.9	26	11	158.3	118.8	130.3	183.7	110.1	143.9	18.3	135.8	145.9	7.42077	0.000714865	7.97268	0.00418502
AT5G52810	Protein SAR DEFICIENT 4	0.01	23.7	26.7	136.5	124.7	111	153.4	194.8	129.2	16.8033	124.067	159.133	7.38346	0.000665232	9.47034	0.00244302
AT2G38290	Ammonium transporter 2	0.01	62.3	0.01	122.2	188.7	146.5	124.8	130.7	124.9	20.7733	152.467	126.8	7.33954	0.00979681	6.10398	0.00706067
AT5G01590	Protein TIC 56, Chloroplastic	50	4.3	2.5	126.9	155	134.5	140.3	138.3	148.2	18.9333	138.8	142.267	7.33099	0.00246159	7.51408	0.00146497
AT3G04720	Hevein-like preproprotein	21.5	17	13.1	135.9	104.9	133.3	153	180.5	140.9	17.2	124.7	158.133	7.25	0.000462079	9.1938	0.000297263
AT3G23390	60S ribosomal protein L36a	19.7	14.2	17.1	123.9	131.4	109.5	176.2	152.4	155.7	17	121.6	161.433	7.15294	9.36982e-05	9.49608	4.5447e-05
AT3G45860	Cysteine-rich receptor-like protein kinase	20.1	18.5	19.7	143.8	143.2	129.2	125.6	147	153.1	19.4333	138.733	141.9	7.13894	1.54779e-05	7.30189	0.000125857
AT4G18950	BLUE LIGHT-DEPENDENT H+-ATPASE	0.01	0.01	42.7	61.5	113.7	129.5	218.9	103.4	230.2	14.24	101.567	184.167	7.13249	0.0250296	12.9331	0.0167169
AT1G08370	MRNA-decapping enzyme-like protein	17.7	12.1	24.7	94.6	152	140.4	168	173	117.5	18.1667	129	152.833	7.10092	0.00345715	8.41284	0.0017415
AT3G22600	Glycosylphosphatidylinositol (GPI)-anchored LTPg protein	21.3	14.4	15.9	121.4	130.2	113.3	150	166.8	166.8	17.2	121.633	161.2	7.07171	3.94438e-05	9.37209	1.7631e-05
AT2G38860	DJ-1 protein homolog E	19.9	10.8	22.2	155.4	93.7	123.4	156.3	167.3	150.9	17.6333	124.167	158.167	7.04159	0.00420938	8.96975	1.90476e-05
AT4G32180	Pantothenate kinase 2	0.01	0.01	65.4	184.4	128.7	147.2	133.2	120.9	120.2	21.8067	153.433	124.767	7.03607	0.00847494	5.72149	0.00975238
AT3G43810	Calmodulin 7	20.1	21.6	20	151.1	150.1	127.1	140.2	123.5	146.4	20.5667	142.767	136.7	6.94165	9.97097e-05	6.64668	7.12959e-05
AT1G33960	P-loop containing nucleoside triphosphate hydrolases superfamily protein	20.1	24	7	119.6	75.8	158.4	138.6	175.6	180.8	17.0333	117.933	165	6.92368	0.0144457	9.68689	0.000485075
AT1G66410	Calmodulin 4	20.2	21.4	19.9	152.6	146.5	125.7	139.9	125.7	148.1	20.5	141.6	137.9	6.90732	0.000119777	6.72683	5.72668e-05
AT1G18630	GR-RBP6	0.01	60.9	0.01	132.8	140	147.4	161.3	125.2	132.4	20.3067	140.067	139.633	6.89757	0.00445809	6.87623	0.0066725
AT2G03150	Protein SHORT ROOT IN SALT MEDIUM 1	0.01	0.01	60.3	126	165.2	124.6	145.4	130	148.4	20.1067	138.6	141.267	6.89324	0.00795084	7.02586	0.00439434
AT1G16900	Dol-P-Man:Man(6)GlcNAc(2)-PP-Dol alpha-1,2-mannosyltransferase	0.01	0.01	62.4	186.1	117.7	124.6	139	121.5	148.9	20.8067	142.8	136.467	6.86318	0.015415	6.5588	0.006562
AT2G39780	Ribonuclease 2	0.01	57.6	0.01	110.7	162.4	121.3	159.2	154.8	134.1	19.2067	131.467	149.367	6.84485	0.0106658	7.77681	0.00326621
AT1G15790	Mediator of RNA polymerase II transcription subunit 15a-like protein	17.5	17.9	21.5	136.8	110.8	135.5	146.7	175.8	137.4	18.9667	127.7	153.3	6.73286	0.000220574	8.0826	0.000321484
AT5G39950	Thioredoxin H2	0.01	28.5	32	167.8	112.1	127.1	153	178.9	100.7	20.17	135.667	144.2	6.72616	0.00405641	7.14923	0.00784337
AT2G18690	Expressed protein	28	16.8	20.9	118.8	159.9	160.9	131.9	127	135.9	21.9	146.533	131.6	6.69102	0.00094184	6.00913	1.23196e-05
AT5G56730	Insulinase (Peptidase family M16) protein	16.8	22.9	20.4	150.4	140.9	108.2	139	145.5	156	20.0333	133.167	146.833	6.64725	0.000932838	7.32945	1.75583e-05
AT5G05470	Eukaryotic translation initiation factor 2 subunit alpha	0.01	0.01	70.1	141.7	158.6	164.9	137.3	72.7	154.6	23.3733	155.067	121.533	6.63434	0.00567608	5.19966	0.04531
AT3G07300	NagB/RpiA/CoA transferase-like superfamily protein;(source:Araport11)	19.9	0.01	42.7	180	85.1	146.1	149.3	136.1	140.9	20.87	137.067	142.1	6.56764	0.0187036	6.80882	0.000719225
AT5G04885	Glycosyl hydrolase family protein	22.3	21.2	16.9	112	157.4	123.1	153.2	148.5	145.5	20.1333	130.833	149.067	6.49834	0.0012971	7.40397	1.29517e-06
AT3G57090	Mitochondrial fission 1 protein A	0.01	39.8	17.1	159.9	117.2	90.4	156.1	146.6	172.8	18.97	122.5	158.5	6.45756	0.0112855	8.3553	0.000544081
AT4G24520	NADPH--cytochrome P450 reductase	0.01	0.01	65.4	154.4	134.4	131.1	154	129	131.8	21.8067	139.967	138.267	6.41853	0.00678258	6.34057	0.0073715
AT5G25040	Major facilitator superfamily protein	36.6	0.01	29.1	140	147.5	126.2	146.8	133.4	140.4	21.9033	137.9	140.2	6.29585	0.000817795	6.40085	0.000558505
AT2G45220	Probable pectinesterase/pectinesterase inhibitor 17	10	27.3	18	117	106.9	123.3	168.8	160.4	168.2	18.4333	115.733	165.8	6.27848	0.000147951	8.99458	1.31484e-05
AT1G21170	Exocyst complex component SEC5	33.1	32.1	0.01	129.4	139.9	139.8	124.1	148.2	153.5	21.7367	136.367	141.933	6.27358	0.000552351	6.52967	0.00105039
AT5G53350	CLPX	0.01	30.7	31	123.8	124.1	137.5	145.1	141.9	166	20.57	128.467	151	6.24534	0.000655812	7.34079	0.00051604
AT5G03350	Lectin-like protein	22.3	21.3	21.6	133.2	129.2	140.7	144.3	150.9	136.4	21.7333	134.367	143.867	6.18252	4.85738e-06	6.61963	8.33985e-06
AT1G20575	Dolichol-phosphate mannosyltransferase subunit 1	15.2	28.2	18.1	160.8	90.9	125.6	213.9	153.1	94.2	20.5	125.767	153.733	6.13496	0.0068858	7.49919	0.0186058
AT1G02920	Glutathione S-transferase F7	19.3	22.7	20	134.7	114.2	128.4	154.9	159.1	146.7	20.6667	125.767	153.567	6.08548	6.87918e-05	7.43065	3.92946e-06
AT3G19930	STP4	35.1	51.4	0.01	125.7	236.9	161.6	110.5	75.5	103.2	28.8367	174.733	96.4	6.05942	0.0155902	3.34297	0.0218626
AT4G26780	GrpE protein homolog 2, Mitochondrial	67.8	0.01	0.01	137	140	131.5	138.8	138	146.9	22.6067	136.167	141.233	6.0233	0.00751533	6.24742	0.00647745
AT4G03120	U1 small nuclear ribonucleoprotein C	0.01	0.01	65.6	160.1	83.9	151	155.1	159	125.3	21.8733	131.667	146.467	6.01951	0.027792	6.69613	0.00686764
AT3G21140	Pyridoxamine 5'-phosphate oxidase family protein	69.4	0.01	0.01	132.3	123.7	161.1	149.5	153.5	110.6	23.14	139.033	137.867	6.00835	0.0108119	5.95794	0.0129594
AT1G02930	Glutathione S-transferase F6	19.9	22.5	20.9	134.8	115.9	127.8	155.2	157.3	145.7	21.1	126.167	152.733	5.97946	4.64669e-05	7.23855	3.5211e-06
AT5G03490	UDP-glycosyltransferase 89A2	58.6	0.01	0.01	94.9	130.3	124.7	162	139.8	189.7	19.54	116.633	163.833	5.96895	0.0123208	8.38451	0.00402398
AT1G21380	TOM1-like protein 3	0.01	0.01	51.8	133.6	76	99.4	163.3	166.2	209.8	17.2733	103	179.767	5.96295	0.023448	10.4072	0.0020818
AT3G01290	HIR2	23.7	19	22.3	132.6	129.4	125.4	148.7	152.3	146.6	21.6667	129.133	149.2	5.96	1.76705e-06	6.88615	5.02418e-07
AT2G13560	NAD-dependent malic enzyme 1, Mitochondrial	26.1	23	24.3	150.4	147.8	136.7	140.4	117.9	133.5	24.4667	144.967	130.6	5.92507	9.61139e-06	5.33787	9.36593e-05
AT1G54030	Inactive GDSL esterase/lipase-like protein 25	63.5	0.01	0.01	142.1	94.7	137.3	177.8	160.1	124.5	21.1733	124.7	154.133	5.88948	0.0163286	7.2796	0.00723713
AT2G47130	Short-chain dehydrogenase reductase 3a	17.6	20.8	31.2	117.8	161.4	129.9	153.7	131.2	136.3	23.2	136.367	140.4	5.87787	0.00114852	6.05172	0.000123383
AT2G41250	Haloacid dehalogenase-like hydrolase (HAD) superfamily protein	33.7	34	0.01	146.3	126.8	121.4	160.3	159.8	117.7	22.57	131.5	145.933	5.82632	0.0013108	6.46581	0.00240765
AT4G00290	Mechanosensitive ion channel protein 1, Mitochondrial	0.01	33.3	50.2	172	137.3	177.1	116.4	81.1	132.7	27.8367	162.133	110.067	5.82445	0.00225557	3.95402	0.01785
AT3G19010	2-oxoglutarate (2OG) and Fe(II)-dependent oxygenase superfamily protein	14.1	30.5	25	149.1	125.3	130.9	153.6	138	133.5	23.2	135.1	141.7	5.82328	0.00020604	6.10776	0.00010759
AT1G09210	Calreticulin-2	25.1	22.5	23.1	146.9	142.1	121.2	137.1	141.3	140.7	23.5667	136.733	139.7	5.80198	0.000139937	5.92786	1.80065e-07
AT2G23810	TET8	28.2	17.7	19.8	131.5	118.6	131	148.6	152.6	152.1	21.9	127.033	151.1	5.80061	3.8107e-05	6.89954	3.02127e-06
AT1G78920	Pyrophosphate-energized membrane proton pump 2	6.8	45.1	35.6	139.8	187	172.4	78.9	145.1	89.2	29.1667	166.4	104.4	5.70514	0.00161936	3.57943	0.0331563
AT2G17790	Vacuolar protein sorting-associated protein 35A	26.7	18.9	20.3	128.8	81.6	164.7	133.6	169.7	155.8	21.9667	125.033	153.033	5.69196	0.0130319	6.96662	0.000262927
AT4G21450	PapD-like superfamily protein	0.01	0.01	69.5	140.6	145.5	108.4	139.4	133	163.7	23.1733	131.5	145.367	5.67463	0.0139299	6.27301	0.00809201
AT2G38530	Non-specific lipid-transfer protein	0.01	63	0.01	103.3	92.9	158.3	144.3	178.9	159.3	21.0067	118.167	160.833	5.6252	0.0291713	7.6563	0.00385786
AT3G22060	Cysteine-rich repeat secretory protein 38	31.3	20.4	22	127.9	139.3	141.3	135.4	139.7	142.5	24.5667	136.167	139.2	5.54274	3.19561e-05	5.66621	8.61701e-06
AT2G41490	GPT	0.01	67.2	0.01	128.8	135.8	102.6	165.3	154.5	145.8	22.4067	122.4	155.2	5.46266	0.0152271	6.92651	0.00453642
AT4G30270	Xyloglucan endotransglucosylase/hydrolase protein 24	8	26.9	37.8	138.6	116.8	131	158.8	165.6	116.5	24.2333	128.8	146.967	5.31499	0.000636318	6.06465	0.00224952
AT1G56340	Calreticulin-1	21.8	28.5	26.1	139.2	142.2	124.3	134.7	136.3	147	25.4667	135.233	139.333	5.31021	4.82006e-05	5.4712	1.24263e-05
AT5G06320	NHL3	23.2	26.1	24.2	135.1	119.1	133	147.8	148.9	142.6	24.5	129.067	146.433	5.26803	3.32019e-05	5.97687	5.48002e-07
AT5G55450	Bifunctional inhibitor/lipid-transfer protein/seed storage 2S albumin superfamily protein	23.7	21.7	28	128.4	111.4	142.7	154.9	158.4	130.7	24.4667	127.5	148	5.21117	0.000367454	6.04905	0.000156545
AT4G03560	CALCIUM CHANNEL 1	19.3	25.4	29.5	161.7	95.2	128.9	149.3	144	146.8	24.7333	128.6	146.7	5.19946	0.00589709	5.93127	3.33873e-06
AT1G03750	Switch 2	0.01	0.01	82.9	172.9	114.8	142.9	149.4	117.7	119.3	27.64	143.533	128.8	5.19296	0.0230562	4.65991	0.0265309
AT5G53130	Cyclic nucleotide-gated ion channel 1	79.6	0.01	0.01	92.7	177.2	143.3	132.8	90.4	183.9	26.54	137.733	135.7	5.18965	0.0370706	5.11304	0.0449152
AT1G27770	Chloroplast envelope Ca2+-ATPase	34.1	39.3	8.5	152.6	144.2	127.2	124.9	137.9	131.4	27.3	141.333	131.4	5.17705	0.000706921	4.81319	0.000525711
AT3G03470	Cytochrome P450 89A9	48.8	18.5	11	143.9	140.2	120.4	126.6	154.1	136.6	26.1	134.833	139.1	5.16603	0.00135125	5.3295	0.001306
AT5G59610	Chaperone DnaJ-domain superfamily protein	0.01	39.1	46	135.5	123.7	178.6	144.4	147	85.7	28.37	145.933	125.7	5.14393	0.00589755	4.43074	0.0167469
AT2G26440	Probable pectinesterase/pectinesterase inhibitor 12	41.8	30.8	0.01	137.6	111.8	123.4	172.3	141.7	140.7	24.2033	124.267	151.567	5.13428	0.00234989	6.26222	0.00143007
AT2G04450	Nudix hydrolase 6	30.4	23.2	25.3	147.9	128	128.7	148.6	139.9	127.9	26.3	134.867	138.8	5.12801	9.32225e-05	5.27757	6.03863e-05
AT1G18210	Probable calcium-binding protein CML27	20.6	30	25.2	141	116.8	123.2	145.4	150.9	146.7	25.2667	127	147.667	5.02639	0.00019268	5.84433	2.72482e-06
AT1G09080	Probable mediator of RNA polymerase II transcription subunit 37b	26.5	27.3	28.1	145.1	134.7	128.7	138.8	129.3	141.4	27.3	136.167	136.5	4.98779	2.26244e-05	5	7.90124e-06
AT4G27740	Protein yippee-like	23.3	27.3	26.8	125.7	128.5	129.8	146.8	149.6	142.1	25.8	128	146.167	4.96124	5.09511e-07	5.66537	1.15687e-06
AT3G13790	Beta-fructofuranosidase, Insoluble isoenzyme CWINV1	26.6	28.3	19.3	131.3	119	117.7	158.7	145.1	154.1	24.7333	122.667	152.633	4.95957	4.46236e-05	6.17116	1.23398e-05
AT5G07340	Calreticulin family protein	31.6	35.7	15.6	124.7	149.5	135.1	130.6	129	148.2	27.6333	136.433	135.933	4.93727	0.000324935	4.91918	0.000237879
AT5G45510	Probable disease resistance protein At5g45510	27.5	29.8	25.1	116.1	148.2	140.4	118	148.3	146.7	27.4667	134.9	137.667	4.91141	0.000387248	5.01214	0.000376102
AT4G01700	Chitinase family protein;(source:Araport11)	28.9	25.1	26.7	138	125.2	133.1	143.6	142.4	136.9	26.9	132.1	140.967	4.91078	1.10932e-05	5.2404	1.05663e-06
AT2G44290	Protein YLS3	23.7	28.2	24	127.5	114.8	130.1	143.5	150.1	158.1	25.3	124.133	150.567	4.90646	3.69762e-05	5.95125	9.59531e-06
AT3G53980	Bifunctional inhibitor/lipid-transfer protein/seed storage 2S albumin superfamily	33.1	34.8	28.8	155.6	174.5	143.6	120.1	99.5	109.9	32.2333	157.9	109.833	4.89866	0.0001642	3.40745	0.000235771
AT1G66880	Protein kinase superfamily protein	21.4	27.3	25.5	106.4	135.1	118.8	161.6	141.8	162.1	24.7333	120.1	155.167	4.8558	0.000358059	6.27358	4.63661e-05
AT3G15640	Cytochrome c oxidase subunit 5b-1, Mitochondrial	17.2	30.6	42.2	142.5	169.7	123.2	128.6	124.1	121.9	30	145.133	124.867	4.83778	0.00166976	4.16222	0.000223458
AT5G61790	Calnexin 1	29.7	32.7	22.6	125.9	147.1	138.1	131.2	127.7	145	28.3333	137.033	134.633	4.83647	9.13296e-05	4.75176	6.24654e-05
AT5G53370	Pectin methylesterase PCR fragment F	31.7	24.7	27.5	116.4	176.5	110	148.9	111.3	153	27.9667	134.3	137.733	4.80215	0.00750479	4.92491	0.00121831
AT3G59020	Importin beta-like SAD2 homolog	33.1	31.4	27.1	137.6	157.2	142.7	129.7	109	132.3	30.5333	145.833	123.667	4.7762	4.72428e-05	4.05022	0.000252662
AT1G31550	GDSL esterase/lipase At1g31550	78.3	0.01	0.01	111.1	150	111.3	113	150.2	186.1	26.1067	124.133	149.767	4.75485	0.0281574	5.73672	0.0211192
AT3G11910	UBP13	29.2	31	30.1	160.7	135.9	132.1	101.2	142.8	137	30.1	142.9	127	4.74751	0.000231389	4.21927	0.00174011
AT3G16630	Kinesin-like protein	89.8	0.01	0.01	154.3	140.3	130.3	113.1	138.4	133.8	29.94	141.633	128.433	4.73057	0.0220654	4.28969	0.0333776
AT2G17720	Prolyl 4-hydroxylase 5	28.5	29.9	27.1	100.3	143.7	159.8	142.6	103.3	164.8	28.5	134.6	136.9	4.72281	0.00396656	4.80351	0.00382947
AT4G05020	NAD(P)H dehydrogenase B2	25.4	27.9	30.6	127.6	133.8	131.1	141.7	139.1	142.9	27.9667	130.833	141.233	4.67819	1.60108e-06	5.05006	4.48864e-07
AT3G51450	Protein STRICTOSIDINE SYNTHASE-LIKE 7	33.1	36.8	29.5	146.5	148.7	167.6	154.9	94.3	88.6	33.1333	154.267	112.6	4.65594	6.62112e-05	3.39839	0.020339
AT3G48530	SNF1-related protein kinase regulatory subunit gamma-1	0.01	37.2	49	135	156.5	109.7	132.5	166	114.2	28.7367	133.733	137.567	4.65375	0.00632129	4.78715	0.00678124
AT5G24810	ABC1 family protein	25.4	25.8	34.2	142.7	98	156.6	163.5	133.5	120.5	28.4667	132.433	139.167	4.65222	0.00438046	4.88876	0.00105924
AT1G71100	Probable ribose-5-phosphate isomerase 1	20.9	21.4	38.9	126.1	106.8	144.1	152.5	130.3	158.9	27.0667	125.667	147.233	4.64286	0.00130918	5.43966	0.000331915
AT3G57240	Probable glucan endo-1,3-beta-glucosidase BG3	23	28.4	34.5	136.1	124.2	137	145.5	137.6	133.7	28.6333	132.433	138.933	4.62515	3.99662e-05	4.85215	2.13271e-05
AT5G06600	Ubiquitin carboxyl-terminal hydrolase 12	25.4	33.8	31.3	164.2	129.8	124	113.3	148.9	129.5	30.1667	139.333	130.567	4.61878	0.00103415	4.32818	0.000690062
AT5G25120	Cytochrome P450 71B11	31.7	34.4	34.7	157.2	171.4	132.2	104.8	113.3	120.2	33.6	153.6	112.767	4.57143	0.000476197	3.35615	6.43076e-05
AT2G02930	Glutathione S-transferase F3	26.1	27.1	29.7	129.1	122.8	122.8	142.7	156.7	143	27.6333	124.9	147.467	4.5199	2.06499e-06	5.33655	1.45417e-05
AT1G21250	Wall-associated receptor kinase 1	30.4	28.4	28.6	130.9	133.4	127.8	140.7	137.3	142.6	29.1333	130.7	140.2	4.48627	5.15876e-07	4.81236	3.10372e-07
AT3G51430	Protein STRICTOSIDINE SYNTHASE-LIKE 5	20.5	29.8	27.4	156	62.4	127.4	176.4	161.1	139	25.9	115.267	158.833	4.45045	0.0325622	6.13256	0.000289342
AT5G64000	SAL2 phosphatase	0.01	43.8	48.3	144.4	127.9	136.3	136.9	123.9	138.5	30.7033	136.2	133.1	4.436	0.00281866	4.33503	0.00311867
AT4G05000	Vacuolar protein sorting-associated protein 28 homolog	22.8	22.5	40.2	169	111.6	98.4	160.3	158.4	116.9	28.5	126.333	145.2	4.43275	0.0120769	5.09474	0.00159501
AT4G35310	CPK5	25.4	31.6	32.4	122.8	137.1	135.5	143.2	138.4	133.6	29.8	131.8	138.4	4.42282	3.5068e-05	4.6443	6.77099e-06
AT5G25265	Hydroxyproline O-arabinosyltransferase 1	55.2	32.2	13.7	211.8	122.2	110	120.2	114.1	120.8	33.7	148	118.367	4.39169	0.0289499	3.51236	0.0022591
AT1G30400	ABC transporter C family member 1	35.4	18.2	34.6	134.1	119.6	133.6	134.1	136.3	154.1	29.4	129.1	141.5	4.39116	0.00017082	4.81293	0.000187122
AT3G47380	Pectinesterase inhibitor 11	29.3	35.2	28.9	130.4	132.5	146.1	115.6	126	155.8	31.1333	136.333	132.467	4.37901	3.87423e-05	4.25482	0.00115383
AT4G23220	Cysteine-rich receptor-like protein kinase 14	31.9	30.7	28.8	126.7	148.8	124.5	122	136.6	150.1	30.4667	133.333	136.233	4.37637	0.000192094	4.47155	0.000204779
AT5G28740	Tetratricopeptide repeat (TPR)-like superfamily protein	14.8	50.3	29	71.5	162.8	177.1	154	66.6	174.1	31.3667	137.133	131.567	4.37194	0.0379273	4.19447	0.044195
AT1G06530	Peroxisomal and mitochondrial division factor 2	31	31.9	33	134.3	150.8	132.7	124.6	128.3	133.4	31.9667	139.267	128.767	4.35662	5.07212e-05	4.02815	3.18371e-06
AT5G62740	HIR4	31.3	27.7	27.9	130.5	121	126.7	142.5	152.6	139.7	28.9667	126.067	144.933	4.35213	5.41514e-06	5.00345	9.18962e-06
AT1G04980	Protein disulfide-isomerase like 2-2	34.1	33.8	30.3	143.5	151.4	132	110.1	121.9	142.7	32.7333	142.3	124.9	4.34725	4.50855e-05	3.81568	0.000659853
AT2G31880	Leucine-rich repeat receptor-like serine/threonine/tyrosine-protein kinase SOBIR1	31.6	28.1	32.9	115.4	135.3	149.8	135.5	131.6	139.7	30.8667	133.5	135.6	4.32505	0.000522817	4.39309	2.81046e-06
AT3G13560	Glucan endo-1,3-beta-glucosidase 4	24.1	34.4	29.9	133.2	129.4	117.7	144.2	142.7	144.3	29.4667	126.767	143.733	4.30204	6.15215e-05	4.87783	2.9364e-06
AT1G20760	Calcium-binding EF hand family protein	18.3	36.1	32.5	186.7	78.1	107.1	173.6	146	121.6	28.9667	123.967	147.067	4.27963	0.0447371	5.0771	0.00178454
AT3G11010	Receptor-like protein 34	40.2	0.01	38.8	102.5	90.6	144.9	150.2	171.1	161.8	26.3367	112.667	161.033	4.27794	0.0149444	6.11442	0.000745264
AT3G06670	Binding protein	19.3	36.7	47.8	148.4	166.3	129	101.7	125.9	124.9	34.6	147.9	117.5	4.27457	0.00113249	3.39595	0.0019363
AT4G31880	Transcriptional regulator	44.8	27.5	30	119.4	187.2	129.6	169.6	106.2	85.7	34.1	145.4	120.5	4.26393	0.00693986	3.53372	0.0286818
AT4G22305	SUPPRESSOR OF AVRBST-ELICITED RESISTANCE 1	27.1	32.3	32	126.3	135.3	127.5	126.6	160.1	132.8	30.4667	129.7	139.833	4.25711	7.1662e-06	4.58972	0.000467122
AT1G64350	Protein SEH1	69.2	21.8	0.01	132.6	155.5	97.6	118.4	201.3	103.6	30.3367	128.567	141.1	4.238	0.0206328	4.65114	0.0390011
AT5G16880	TOM1-like protein 1	34	32.8	31.9	160.6	126.7	126.5	125.5	130.3	131.6	32.9	137.933	129.133	4.1925	0.00075809	3.92503	1.01336e-06
AT2G04160	Subtilisin-like protease SBT5.3	0.01	55.2	49.4	183.4	98.8	154.5	141.9	70.4	146.4	34.87	145.567	119.567	4.17455	0.021894	3.42893	0.0486323
AT2G27100	SE	37.1	33.2	31.7	136.5	132.3	156.1	127.2	110.3	135.7	34	141.633	124.4	4.16569	0.000137616	3.65882	0.000291495
AT2G01540	Protein C2-DOMAIN ABA-RELATED 10	26	27.9	36.9	120.4	140.1	117	145	129.7	156.9	30.2667	125.833	143.867	4.15749	0.000274093	4.7533	0.000186334
AT3G49120	Peroxidase 34	29.5	30.8	29	119.1	127.4	123.9	142.9	154.4	142.8	29.7667	123.467	146.7	4.14782	2.85999e-06	4.92833	7.27441e-06
AT4G21180	DnaJ protein ERDJ2B	23.9	46.4	36.7	125.8	177	140.4	122.6	115.7	111.6	35.6667	147.733	116.633	4.14206	0.00248955	3.27009	0.000368566
AT1G48320	DHNAT1	18.9	36	30.6	71	144.7	136.8	161.6	143.1	157.2	28.5	117.5	153.967	4.12281	0.0204073	5.40234	7.57529e-05
AT5G37720	THO complex subunit 4D	33.7	29.6	28.9	132.2	126.3	120.7	137.9	150.1	140.5	30.7333	126.4	142.833	4.1128	1.24825e-05	4.64751	9.65143e-06
AT3G56820	RmlC-type cupin;(source:Araport11)	0.01	0.01	96.3	148.9	140.9	105.3	130.9	153.9	123.8	32.1067	131.7	136.2	4.10195	0.0457731	4.24211	0.035508
AT1G35580	Alkaline/neutral invertase CINV1	28.1	47.6	24.9	138.6	137.6	135.9	123.4	123.6	140.3	33.5333	137.367	129.1	4.09642	0.000129838	3.8499	0.000452629
AT3G42790	AL3	32.1	43.4	27.9	135.5	169.9	116.3	141.8	118.5	114.6	34.4667	140.567	124.967	4.07834	0.00290631	3.62573	0.000726254
AT1G10130	Calcium-transporting ATPase 3, Endoplasmic reticulum-type	39.8	59.6	9.9	153.4	147.7	142	125.3	118.8	103.4	36.4333	147.7	115.833	4.05398	0.00168233	3.17932	0.00742057
AT5G49570	Transglutaminase	31.9	32	41.7	120.7	160.8	142.4	127.5	117.7	125.4	35.2	141.3	123.533	4.0142	0.000913812	3.50947	3.66242e-05
AT1G51660	MKK4	101.9	0.01	0.01	133.3	151.4	124.4	139.8	123.9	125.2	33.9733	136.367	129.633	4.01393	0.0425756	3.81574	0.0495456
AT1G20696	High mobility group B3	35.5	61.8	0.01	140.2	122.7	127.4	135.6	124.2	152.7	32.4367	130.1	137.5	4.01089	0.00635592	4.23903	0.00598047
AT4G23150	Cysteine-rich receptor-like protein kinase.	35.8	32.6	32.8	132.4	145.4	127.9	118.4	131.7	142.9	33.7333	135.233	131	4.00889	4.53932e-05	3.8834	0.000169655
AT1G71880	Sucrose transport protein SUC1	35.5	33.6	27.8	135	122.2	131.2	151.9	135.4	127.4	32.3	129.467	138.233	4.00826	2.59394e-05	4.27967	0.000151721
AT3G50930	Protein HYPER-SENSITIVITY-RELATED 4	29.3	40	28.7	148	119	123.9	140	134	137.1	32.6667	130.3	137.033	3.98878	0.000544726	4.1949	1.35899e-05
AT3G07770	Heat shock protein 90-6, Mitochondrial	30.7	37.2	32.7	142.8	139.9	118.2	125.8	134	138.7	33.5333	133.633	132.833	3.98509	0.000234281	3.96123	1.95402e-05
AT5G37600	Glutamine synthetase cytosolic isozyme 1-1	30.8	34.8	32.3	142.4	119.6	125.9	140.4	136.7	137.2	32.6333	129.3	138.1	3.96221	0.00015036	4.23187	3.54114e-07
AT3G07690	6-phosphogluconate dehydrogenase family protein	37.4	0.01	66.3	145.1	110.2	153.3	154.4	127.7	105.5	34.57	136.2	129.2	3.93983	0.0120418	3.73734	0.016532
AT3G54540	ABC transporter F family member 4	75.7	0.01	31.4	141	150.2	128	122.5	131.7	119.6	35.7033	139.733	124.6	3.91373	0.010444	3.48987	0.0162081
AT5G48380	Probably inactive leucine-rich repeat receptor-like protein kinase At5g48380	36.2	29.3	38.8	119.9	142.1	146.2	129.6	125.4	132.5	34.7667	136.067	129.167	3.91371	0.000303686	3.71524	1.12937e-05
AT4G16190	Probable cysteine protease RD19C	55.3	41.9	0.01	140.8	106.9	132.1	153.1	123	146.9	32.4033	126.6	141	3.90701	0.00847226	4.3514	0.00464708
AT2G34585	Transmembrane protein	34.5	66.4	0.01	120.1	149.9	123.5	166.5	94.6	144.5	33.6367	131.167	135.2	3.89951	0.0102894	4.01942	0.0238642
AT1G33610	Leucine-rich repeat (LRR) family protein	35.3	31.6	35.3	113.5	156.5	128.3	136.8	130.1	132.5	34.0667	132.767	133.133	3.89726	0.00146571	3.90802	1.78464e-06
AT1G55210	Dirigent protein 20	40.5	30.9	33.1	131.6	143.7	130.9	136.2	124.6	128.5	34.8333	135.4	129.767	3.88708	3.80797e-05	3.72536	2.92483e-05
AT3G54960	PDIL1-3	37	31	36.7	131.3	135	133	128.9	134.2	133	34.9	133.1	132.033	3.81375	1.57766e-06	3.78319	2.73506e-06
AT4G25550	Pre-mRNA cleavage factor Im 25 kDa subunit 2	24.8	41.1	32.2	169.6	93.6	110.7	140.1	152.8	135	32.7	124.633	142.633	3.81142	0.0173544	4.36188	0.000100763
AT4G39090	RD19A	48.9	31.2	16.6	103.9	128.8	132.6	148	149	141	32.2333	121.767	146	3.77766	0.00230944	4.52947	0.000298852
AT1G21270	Wall-associated receptor kinase 2	31.9	32.9	36.6	130.2	130.3	121.8	139.2	143.6	133.5	33.8	127.433	138.767	3.77022	7.71275e-06	4.10552	5.50872e-06
AT1G21240	Wall-associated receptor kinase 3	28.7	34.2	34.3	116.9	125.2	123.1	143.4	148.6	145.6	32.4	121.733	145.867	3.7572	8.6689e-06	4.50206	1.17031e-06
AT3G14840	Probable leucine-rich repeat receptor-like serine/threonine-protein kinase At3g14840	36.1	32.7	37.4	119.1	137.7	141.7	130.8	131.7	133	35.4	132.833	131.833	3.75235	0.000163596	3.72411	3.89411e-07
AT1G77510	Protein disulfide isomerase-like 1-2	37.4	33.7	32.2	135.7	124.5	127.4	136.9	135.4	136.8	34.4333	129.2	136.367	3.75218	1.37239e-05	3.96031	3.815e-07
AT1G71697	Probable choline kinase 1	38.3	34.6	25.6	137.4	106	125.8	113.5	177.1	141.7	32.8333	123.067	144.1	3.74822	0.000807631	4.38883	0.00406729
AT5G43060	Probable cysteine protease RD21B	42.2	33.9	29.5	128.1	133.5	132.7	123.9	125.1	151	35.2	131.433	133.333	3.7339	1.9266e-05	3.78788	0.000514514
AT3G16000	MAR-binding filament-like protein 1	38.3	33.3	36.2	134.2	132.9	135.2	127.8	129.5	132.8	35.9333	134.1	130.033	3.73191	4.17558e-07	3.61874	1.38139e-06
AT3G26210	Cytochrome P450 71B23	21.9	40.8	41.2	144.5	120.9	121.2	146.2	142.1	121.4	34.6333	128.867	136.567	3.72089	0.000729721	3.94321	0.00051633
AT1G11330	G-type lectin S-receptor-like serine/threonine-protein kinase At1g11330	41.1	36.2	34.9	121.8	142	153	111.1	120.9	139	37.4	138.933	123.667	3.7148	0.000404615	3.3066	0.000503912
AT3G45640	MPK3	44.5	29.1	30.2	136.9	126.7	121.3	149.1	130.2	132.1	34.6	128.3	137.133	3.70809	0.000155882	3.96339	0.000192573
AT1G31130	F28K20.6 protein	26.9	40.5	39.5	129.2	133	133.6	147.4	129	120.9	35.6333	131.933	132.433	3.70253	3.04482e-05	3.71656	0.000419773
AT4G08770	Peroxidase 37	32.6	33.3	29.4	115.1	114.3	122.2	151.2	153	149	31.7667	117.2	151.067	3.6894	6.70744e-06	4.75551	2.28437e-07
AT3G26420	Glycine-rich RNA-binding protein RZ1A	26	39.5	39.8	175.5	105.3	106.9	144.1	145.1	117.7	35.1	129.233	135.633	3.68186	0.0162395	3.8642	0.000563349
AT3G07570	Cytochrome b561 and DOMON domain-containing protein At3g07570	28	36.6	43	140.1	128	126.8	136.1	129.2	132.2	35.8667	131.633	132.5	3.67007	9.47065e-05	3.69424	3.5423e-05
AT4G23190	Cysteine-rich receptor-like protein kinase 11	37.8	34.9	32.3	130.4	135.6	117.5	115.2	139	157.2	35	127.833	137.133	3.65238	7.81016e-05	3.9181	0.00113583
AT1G02170	MCP1b	43.2	40.5	43	125	163.1	173.8	85	93.8	132.5	42.2333	153.967	103.767	3.64562	0.00166389	2.45699	0.0135842
AT3G62600	DnaJ protein ERDJ3B	40.2	20.7	45.1	151	112.9	121.2	150.6	120.6	137.6	35.3333	128.367	136.267	3.63302	0.00249613	3.8566	0.000912176
AT2G41100	Calmodulin-like protein 12	38.3	33.3	33.2	124.4	125.3	128.6	138.8	143.1	135	34.9333	126.1	138.967	3.60973	1.725e-06	3.97805	3.51826e-06
AT2G36850	Callose synthase 10	34.6	34.7	38.7	147.9	111.1	127.9	141.2	132.5	131.3	36	128.967	135	3.58241	0.000973602	3.75	8.27218e-06
AT4G29900	Calcium-transporting ATPase 10, Plasma membrane-type	50.3	46	17.8	152.7	164.7	90.5	119.7	115.2	143.2	38.0333	135.967	126.033	3.57493	0.017639	3.31376	0.00277282
AT3G46100	Histidine--tRNA ligase, Chloroplastic/mitochondrial	27.9	39.2	40.9	136.1	107.5	141.6	108.2	138.5	160.1	36	128.4	135.6	3.56667	0.00123039	3.76667	0.0030849
AT4G04320	Malonyl-CoA decarboxylase family protein	46.4	30.5	32.1	111.3	129.9	146.9	125.5	144.1	133.3	36.3333	129.367	134.3	3.56055	0.00125028	3.69633	0.000187224
AT5G23890	GPI-anchored adhesin-like protein	36.4	37	36.3	133.4	129.3	127.8	140	123.2	136.7	36.5667	130.167	133.3	3.55971	6.33079e-07	3.6454	4.70772e-05
AT4G23170	Putative cysteine-rich receptor-like protein kinase 9	38.4	33	35.7	127.5	117.2	134.7	136.8	156	120.7	35.7	126.467	137.833	3.54248	6.8808e-05	3.86088	0.000585439
AT3G24350	Syntaxin of plants 32	16.7	51	43.6	160.2	114.7	118.4	155	124.5	116.1	37.1	131.1	131.867	3.53369	0.00632764	3.55436	0.00384856
AT2G39810	HOS1	27.2	43.5	38.5	150.4	122.5	112.3	135.8	134.3	135.5	36.4	128.4	135.2	3.52747	0.00174306	3.71429	3.40885e-05
AT5G48540	Cysteine-rich repeat secretory protein 55	36.4	36.2	34.4	130.6	113	133.5	131.8	138.4	145.8	35.6667	125.7	138.667	3.5243	0.000151519	3.88785	1.48102e-05
AT2G22500	Mitochondrial uncoupling protein 5	49.5	25.7	31.6	135.4	129.5	111.1	137.8	139.9	139.5	35.6	125.333	139.067	3.5206	0.000933031	3.90637	0.000135119
AT1G12780	Bifunctional UDP-glucose 4-epimerase and UDP-xylose 4-epimerase 1	41.4	41.8	33.8	141.1	123.6	146.1	140.6	118.5	113	39	136.933	124.033	3.51111	0.000178641	3.18034	0.000649213
AT3G49140	Pentatricopeptide repeat (PPR) superfamily protein	25	45.9	48.8	154	129.1	134.7	150.8	66.5	145.2	39.9	139.267	120.833	3.49039	0.000730367	3.0284	0.0456024
AT4G11850	Phospholipase D gamma 1	36.9	42	41.8	157.9	95.8	165.9	122	111	126.7	40.2333	139.867	119.9	3.47639	0.010951	2.98012	8.6623e-05
AT4G34150	Calcium-dependent lipid-binding (CaLB domain) family protein	34.4	36.3	38.3	129.5	117.4	131.1	139.4	136.3	137.4	36.3333	126	137.7	3.46789	3.64145e-05	3.78991	2.48162e-07
AT3G21790	Glycosyltransferase	0.01	57.9	45.4	125	97.8	135.2	140.9	159.4	138.4	34.4367	119.333	146.233	3.4653	0.0151532	4.24644	0.0040063
AT3G24090	GFAT	41.2	22.1	56.3	124.4	152.7	136.4	147.8	108	111	39.8667	137.833	122.267	3.45736	0.00159016	3.06689	0.00701152
AT1G21750	Protein disulfide isomerase-like 1-1	38.2	37.3	36.7	134.8	127.2	125.7	138.6	127.6	133.8	37.4	129.233	133.333	3.45544	5.5329e-06	3.56506	7.49972e-06
AT5G20660	24 kDa vacuolar protein-like	44.5	9.3	69.5	152.1	135.1	138.8	138.1	78.8	133.8	41.1	142	116.9	3.45499	0.00518552	2.84428	0.0428198
AT1G11260	STP1	42.3	44.2	37.5	116.5	183.5	126.6	134.2	105.6	109.6	41.3333	142.2	116.467	3.44032	0.00855619	2.81774	0.00120433
AT5G51830	Probable fructokinase-7	37.3	36.6	34.6	147.2	105	120.6	141.9	162.7	114.2	36.1667	124.267	139.6	3.43594	0.00203941	3.85991	0.00182415
AT4G19880	Glutathione S-transferase family protein	41.2	32	35.8	116.5	125	132.7	137	142	137.9	36.3333	124.733	138.967	3.43303	8.06921e-05	3.82477	4.84316e-06
AT3G55260	Beta-hexosaminidase	55.5	29.1	31.8	125.8	158.7	111.8	136.7	108.1	142.3	38.8	132.1	129.033	3.40464	0.0045438	3.3256	0.00261169
AT1G69730	Wall-associated receptor kinase-like 9	37.8	38.2	32.2	115.9	127.9	123.1	139.7	142.5	142.7	36.0667	122.3	141.633	3.39094	2.70821e-05	3.92699	1.05917e-06
AT3G12740	ALA-interacting subunit 1	41.6	42.8	26.4	101.3	141.4	132.6	145.1	132.9	135.9	36.9333	125.1	137.967	3.38718	0.00265907	3.73556	9.57563e-05
AT1G05270	TraB family protein;(source:Araport11)	48.9	37.3	29.9	164	94	134	136.7	138	117.2	38.7	130.667	130.633	3.3764	0.0119123	3.37554	0.000455382
AT1G14650	Probable splicing factor 3A subunit 1	19.1	50.5	41.5	143.6	115.4	115.7	180.6	84.2	149.3	37.0333	124.9	138.033	3.37264	0.00265497	3.72727	0.0278042
AT4G02520	Glutathione S-transferase F2	34.1	37	38.3	123.6	123.4	121	137.3	147.2	138.1	36.4667	122.667	140.867	3.3638	5.43645e-07	3.86289	6.77402e-06
AT4G27320	Universal stress protein PHOS34	38.9	50.2	36	108.4	174.5	137.3	132.8	88.6	133.2	41.7	140.067	118.2	3.35891	0.00741315	2.83453	0.00770244
AT2G04030	HSP90.5	36.9	48	44.4	161.9	150.8	121.5	106.9	113	116.7	43.1	144.733	112.2	3.35808	0.00123948	2.60325	9.11316e-05
AT1G79380	E3 ubiquitin-protein ligase RGLG4	43.1	36.6	27.8	128.3	120.7	111.8	142.6	135.4	153.8	35.8333	120.267	143.933	3.35628	0.000203975	4.01674	9.97898e-05
AT4G39230	Isoflavone reductase homolog PCBER1	43.6	42.7	33.7	130.7	131	140.7	114.1	122.3	141.2	40	134.133	125.867	3.35333	3.24801e-05	3.14667	0.000571488
AT3G55070	Protein MAEA homolog	55	63.1	0.01	140.7	117.8	136.2	137.9	132.7	116.7	39.37	131.567	129.1	3.3418	0.011818	3.27915	0.0125476
AT2G40600	Appr-1-p processing enzyme family protein	54.8	33.1	32	124.5	141	135.1	118.2	138.7	122.6	39.9667	133.533	126.5	3.34112	0.000453839	3.16514	0.000870087
AT3G48310	Cytochrome P450 71A22	0.01	38.4	46.9	127.2	69	88.4	174.5	230.3	125.3	28.4367	94.8667	176.7	3.33607	0.0412026	6.21381	0.0115603
AT1G77180	SNW/SKI-interacting protein	20.8	47	53	123.6	144.5	131.2	109.7	128.6	141.6	40.2667	133.1	126.633	3.30546	0.00133109	3.14487	0.00310452
AT1G52780	Protein of unknown function (DUF2921)	43.9	38.3	36.2	140.9	105.8	144.5	145.6	124.8	119.9	39.4667	130.4	130.1	3.30405	0.00192919	3.29645	0.000382148
AT1G06060	LisH and RanBPM domains containing protein;(source:Araport11)	29.6	42.1	43.1	147.7	104.4	126.7	169.5	132.1	104.7	38.2667	126.267	135.433	3.29965	0.00265603	3.5392	0.00727774
AT3G09840	CDC48A	40.1	40.1	38.2	138.3	126.5	125.8	134	125.3	131.8	39.4667	130.2	130.367	3.29899	2.47797e-05	3.30321	4.55734e-06
AT5G18100	Superoxide dismutase	37.6	44.8	49.3	147.7	129.5	156.1	103.8	117.4	113.8	43.9	144.433	111.667	3.29005	0.000300418	2.54366	0.000216689
AT4G27500	Proton pump-interactor 1	43.9	32.9	38.3	126.5	126.4	124.2	135.9	132.1	139.9	38.3667	125.7	135.967	3.27628	1.15856e-05	3.54387	1.50281e-05
AT3G07720	Galactose oxidase/kelch repeat superfamily protein;(source:Araport11)	37.3	41.6	39.3	123.5	124.5	138.9	129.6	128.4	136.9	39.4	128.967	131.633	3.27327	6.30758e-05	3.34095	6.08768e-06
AT1G80070	SUS2	42.8	28.4	44.4	110.6	131.1	136.2	140.3	129.7	136.6	38.5333	125.967	135.533	3.26903	0.000722857	3.5173	8.34552e-05
AT2G01650	Plant UBX domain-containing protein 2	38.8	24	58.1	138	124.2	132.2	123	135.7	126.1	40.3	131.467	128.267	3.2622	0.00102335	3.1828	0.00114579
AT1G65220	ARM repeat superfamily protein	52.8	37	40.7	127.5	157.7	140.3	91.1	118.1	134.7	43.5	141.833	114.633	3.26054	0.000592303	2.63525	0.00633404
AT4G37640	CALCIUM ATPASE 2	42.9	32.9	43.4	118.5	135	133.5	138.2	129.5	126	39.7333	129	131.233	3.24664	0.000142288	3.30285	5.18246e-05
AT5G20350	Protein S-acyltransferase 24	34.9	36.3	45.6	184.6	87.8	106.8	136.4	172.3	95.2	38.9333	126.4	134.633	3.24658	0.0426046	3.45805	0.0131747
AT4G23650	CPK3	42.3	39.4	31.6	133	114	119.9	137.2	145.5	137.2	37.7667	122.3	139.967	3.23831	0.000196896	3.70609	1.73494e-05
AT2G43850	Integrin-linked protein kinase 1	43.1	27.9	54.2	131	152.4	121.6	121.6	101.5	146.7	41.7333	135	123.267	3.23482	0.00142263	2.95367	0.0057409
AT2G45070	Protein transport protein Sec61 subunit beta	61.2	35.4	18.1	159.5	91	119.7	135.3	139.3	140.5	38.2333	123.4	138.367	3.22755	0.0222111	3.61901	0.00136617
AT1G05010	1-aminocyclopropane-1-carboxylate oxidase 4	38.1	37.4	39.5	122.3	120.9	125.7	141.8	139.4	135	38.3333	122.967	138.733	3.20783	6.78962e-07	3.61913	1.11189e-06
AT5G54940	Translation initiation factor SUI1 family protein;(source:Araport11)	41.8	24.6	51.8	122.3	126	129.9	135.4	137.9	130.4	39.4	126.067	134.567	3.19966	0.00046222	3.4154	0.000321536
AT1G02880	Thiamine pyrophosphokinase	23	58.4	38.7	160.6	96.1	126.6	144	135.2	117.4	40.0333	127.767	132.2	3.19151	0.0145285	3.30225	0.00202275
AT3G28450	Inactive LRR receptor-like serine/threonine-protein kinase BIR2	46.4	38.9	39.2	139.7	93	163.5	132.5	108.2	138.8	41.5	132.067	126.5	3.18233	0.0122191	3.04819	0.000915
AT1G50170	Sirohydrochlorin ferrochelatase, Chloroplastic	33.2	31.5	50.4	149.6	94	121.8	129.4	185	105.3	38.3667	121.8	139.9	3.17463	0.00824656	3.64639	0.0140509
AT5G12890	Glycosyltransferase (Fragment)	41.1	45.7	33.4	96.6	136.2	148.5	135	121.5	141.9	40.0667	127.1	132.8	3.17221	0.00562451	3.31448	0.000185854
AT5G03340	Cell division control protein 48 homolog E	41.1	41.2	39.4	139.6	122.8	122.4	135.1	126.9	131.4	40.5667	128.267	131.133	3.16187	0.000103962	3.23254	3.15495e-06
AT3G13330	PA200	23.4	43.4	51.2	119.5	113.5	138.9	141.1	120.4	148.6	39.3333	123.967	136.7	3.15169	0.00168962	3.47542	0.00118328
AT3G29250	Short-chain dehydrogenase reductase 4	39.5	55.8	32.7	99.2	177.5	124.7	143	105	122.7	42.6667	133.8	123.567	3.13594	0.0192899	2.89609	0.00333945
AT1G55020	Linoleate 9S-lipoxygenase 1	59.7	38.2	37.2	141.7	150.9	129.8	138.7	109.2	94.6	45.0333	140.8	114.167	3.12657	0.000555519	2.53516	0.00974183
AT4G24800	ECIP1	47	43	46.9	137.8	160.3	129.9	106.6	107.1	121.4	45.6333	142.667	111.7	3.12637	0.000457423	2.44777	0.000193694
AT1G64710	Alcohol dehydrogenase-like 4	35	49.1	30.6	152	98.1	108.1	149.4	153.4	124.2	38.2333	119.4	142.333	3.12293	0.00968758	3.72276	0.000626949
AT1G59710	Actin cross-linking protein (DUF569)	9	49.9	64.8	113.8	100.8	170.5	104.1	147.9	139.2	41.2333	128.367	130.4	3.11318	0.032543	3.16249	0.0140441
AT1G48920	Nucleolin 1	54.2	45.4	35.3	128.2	159.6	130.9	117.1	106.6	122.6	44.9667	139.567	115.433	3.10378	0.00116505	2.56709	0.000610864
AT5G55230	Microtubule-associated proteins 65-1	26.8	44.3	57.6	140.1	133.3	125	129.9	119.4	123.5	42.9	132.8	124.267	3.09557	0.000824899	2.89666	0.000990945
AT3G43800	Glutathione S-transferase U27	59.1	45.4	22.7	156.5	107.4	129.8	139.7	100	139.5	42.4	131.233	126.4	3.09513	0.00742437	2.98113	0.00771067
AT2G30880	SWAP70	0.01	46.8	82.5	131.1	130.5	138.2	126.8	130	114.1	43.1033	133.267	123.633	3.09179	0.0198623	2.8683	0.0298194
AT4G22330	Nuclear and endoplasmic reticulum localized Acyl-CoA independent ceramide synthase	57.6	0.01	67.6	123.4	131	129.9	130.4	148.8	111.3	41.7367	128.1	130.167	3.06924	0.0151646	3.11876	0.0202239
AT1G74020	Protein STRICTOSIDINE SYNTHASE-LIKE 12	35.6	49.9	34	133.3	109.5	123.1	142.6	135.8	136.3	39.8333	121.967	138.233	3.06192	0.000655917	3.47029	5.76843e-05
AT5G10760	Aspartyl protease AED1	39.2	40.1	41.3	123.4	128.2	117.2	137.7	136	136.8	40.2	122.933	136.833	3.05804	1.39965e-05	3.40381	2.56859e-08
AT4G33360	NAD(P)-binding Rossmann-fold superfamily protein	52.8	40.4	36.6	127.7	136.3	132.8	125.3	132.9	115.3	43.2667	132.267	124.5	3.05701	8.4816e-05	2.8775	0.000326433
ATCG00140	ATP synthase subunit c, Chloroplastic	20.8	27.2	54.7	101.6	101.3	110.8	153	160.9	169.7	34.2333	104.567	161.2	3.05453	0.00292545	4.70886	0.000377859
AT5G19750	Peroxisomal membrane 22 kDa (Mpv17/PMP22) family protein	83.8	0.01	44.7	111.4	140.8	140.1	137.4	122.6	119.1	42.8367	130.767	126.367	3.05268	0.0279761	2.94996	0.0282592
AT3G25230	Peptidylprolyl isomerase	43	41.4	40.8	128	121	132	125.9	126.6	141.3	41.7333	127	131.267	3.04313	1.3024e-05	3.14537	6.00906e-05
AT1G61250	Secretory carrier-associated membrane protein 3	41.7	41.9	42.7	108.4	136.9	138.3	140.8	108.9	140.3	42.1	127.867	130	3.03721	0.000919981	3.08789	0.00113621
AT3G25780	Allene oxide cyclase 3, Chloroplastic	48.9	37	36.6	131.3	122.9	117.5	139	121.8	144.9	40.8333	123.9	135.233	3.03429	0.000128259	3.31184	0.000297865
AT4G01610	Cathepsin B-like protease 3	33.3	42.2	37.9	112.1	106.2	125.4	142.2	156	144.5	37.8	114.567	147.567	3.03086	0.000249615	3.90388	2.51239e-05
AT1G54090	Exocyst subunit Exo70 family protein	29.1	39.5	49.3	87.6	154.8	114.8	100.2	133.2	191.5	39.3	119.067	141.633	3.02969	0.017304	3.6039	0.0200234
AT1G69840	Hypersensitive-induced response protein 2	44.3	40.6	37.3	128.4	114	126.5	130.4	145.3	133.1	40.7333	122.967	136.267	3.01882	7.68219e-05	3.34534	4.45457e-05
AT5G18480	Inositol phosphorylceramide glucuronosyltransferase 1	32.2	42.4	46.3	120.2	141	102.9	152.9	133	129	40.3	121.367	138.3	3.01158	0.00234313	3.43176	0.000323562
AT5G62720	Integral membrane HPP family protein. Putative nitrate transporter.	67.8	26	27.8	134	115.4	116.4	141.6	143.1	127.8	40.5333	121.933	137.5	3.00822	0.00548626	3.39227	0.00259099
AT5G60640	Protein disulfide-isomerase	35.7	50.2	42.4	133.8	126.2	125.6	132.7	124.7	128.7	42.7667	128.533	128.7	3.00546	6.52062e-05	3.00935	5.64665e-05
AT5G14930	Senescence-associated carboxylesterase 101	21.4	56.5	47.4	163.2	108.6	104.2	119.9	152.1	126.7	41.7667	125.333	132.9	3.0008	0.018274	3.18196	0.00316929
AT3G53500	RSZ32	40.5	43.8	47.6	122.3	156.8	116.7	138.2	102.9	131.3	43.9667	131.933	124.133	3.00076	0.00228366	2.82335	0.00188087
AT4G28470	26S proteasome non-ATPase regulatory subunit 2 homolog B	41.3	43.3	45.4	145.3	130.4	112.3	130.1	118.4	133.6	43.3333	129.333	127.367	2.98462	0.000863952	2.93923	5.9757e-05
AT1G12360	SNARE-interacting protein KEULE	40.3	35.1	57.4	113.5	162.6	120	116.3	130.1	124.7	44.2667	132.033	123.7	2.98268	0.00641856	2.79443	0.000534697
AT1G16670	Cold-responsive protein kinase 1	48.7	42.9	41.4	105.7	138.5	152.4	119.5	117.9	132.9	44.3333	132.2	123.433	2.98195	0.00330935	2.78421	0.000113171
AT1G55450	S-adenosyl-L-methionine-dependent methyltransferases superfamily protein	37	47.8	43.2	128.5	125.6	127.3	130.8	129.5	130.3	42.6667	127.133	130.2	2.97969	1.28661e-05	3.05156	1e-05
AT4G23620	Ribosomal protein L25/Gln-tRNA synthetase, Anti-codon-binding domain-containing protein	53.8	36.3	40.3	125.5	140.5	122.1	120.1	114.9	146.5	43.4667	129.367	127.167	2.97623	0.000375837	2.92561	0.0016699
AT4G34230	Cinnamyl alcohol dehydrogenase 5	43.6	41.4	35.8	110.7	121.2	127.5	135.6	146.5	137.8	40.2667	119.8	139.967	2.97517	0.000125702	3.47599	1.62833e-05
AT4G36210	Protein of unknown function (DUF726)	52.6	32	45.7	114.5	146.2	126.5	130	132.9	119.7	43.4333	129.067	127.533	2.9716	0.00149225	2.9363	0.000317058
AT4G01395	Conserved oligomeric Golgi complex subunit 4	61.4	69.6	0.01	123.8	139.8	125.3	133.9	120.3	126.1	43.67	129.633	126.767	2.96848	0.0188861	2.90283	0.020388
AT5G58030	Trafficking protein particle complex subunit	62.8	58.3	0.01	117.4	139.5	102.3	146.2	143.7	129.7	40.37	119.733	139.867	2.9659	0.0257773	3.46462	0.00884682
AT2G17840	Protein EARLY-RESPONSIVE TO DEHYDRATION 7, Chloroplastic	51.1	39.7	41.6	151.3	148.2	92.6	132	132.2	111.2	44.1333	130.7	125.133	2.96148	0.0111301	2.83535	0.00048757
AT3G42170	DAYSLEEPER	25.3	59.5	47.2	155.1	109.8	125.5	153.3	116	108.2	44	130.133	125.833	2.95758	0.00660258	2.85985	0.00880762
AT3G11820	SYR1	43.9	42.5	36.6	120	125.1	116.7	139.1	134	142.1	41	120.6	138.4	2.94146	1.77901e-05	3.37561	7.42599e-06
AT5G16370	Probable acyl-activating enzyme 5, Peroxisomal	49.8	42.8	39.3	116.3	132.2	139.3	125.2	130.7	124.3	43.9667	129.267	126.733	2.94011	0.000335093	2.88249	2.30971e-05
AT5G47070	Probable serine/threonine-protein kinase PBL19	49.4	43.5	42	105	138.8	152.4	118.6	117.5	132.8	44.9667	132.067	122.967	2.93699	0.00364691	2.73462	0.000135486
AT2G03980	GDSL esterase/lipase At2g03980	47.5	37.8	43	109.9	144.9	120.8	163.1	99.9	133.2	42.7667	125.2	132.067	2.92751	0.00153486	3.08807	0.00842657
AT5G04920	Vacuolar protein sorting-associated protein 36	48.8	52.9	36.5	167.7	128.5	107.4	112.9	105.6	139.7	46.0667	134.533	119.4	2.92041	0.00850159	2.5919	0.00308044
AT1G09560	Germin-like protein subfamily 2 member 1	49.8	33.6	35.6	112.5	116.7	117.9	138.6	149.2	146.1	39.6667	115.7	144.633	2.91681	0.000142954	3.64622	6.2358e-05
AT5G65110	Acyl-coenzyme A oxidase	43.7	46.5	44.1	170.9	120.5	98.8	135	128.8	111.7	44.7667	130.067	125.167	2.90544	0.0162535	2.79598	0.00033201
AT2G45140	Vesicle-associated protein 1-2	38.3	41.4	38.6	128.2	93.3	120.5	137.5	127.1	174.9	39.4333	114	146.5	2.89096	0.00217639	3.71513	0.00181565
AT5G52840	Probable NADH dehydrogenase	38.8	48.4	48.9	146.2	129.5	117.5	119.1	131.4	120.2	45.3667	131.067	123.567	2.88905	0.000663885	2.72373	0.000107399
AT2G20580	26S proteasome non-ATPase regulatory subunit 2 homolog	41.5	44.9	49.5	153.4	135	103.5	129.3	108.5	134.4	45.3	130.633	124.067	2.88374	0.00443837	2.73878	0.000673295
AT3G54150	Embryonic abundant protein-like	39.6	50.5	39.6	115	132.5	126.4	143	123.8	129.6	43.2333	124.633	132.133	2.88281	0.000205036	3.05628	0.000191672
AT4G34480	Glucan endo-1,3-beta-glucosidase 7	44.4	40.7	45	138.1	118.4	118.2	149.7	131.3	114.1	43.3667	124.9	131.7	2.88009	0.000267216	3.03689	0.00104063
AT5G53330	Proline-rich cell wall protein-like	72	30.5	31.3	123	103	158.7	126.5	106.3	148.8	44.6	128.233	127.2	2.87519	0.0171193	2.85202	0.0109035
AT5G51100	Superoxide dismutase	45.6	39.5	43.6	129.1	125.4	112.4	129	141.3	134.1	42.9	122.3	134.8	2.85082	0.000122045	3.14219	2.11418e-05
AT1G76040	Calcium-dependent protein kinase 29	41.1	43.8	41.1	107.2	118.5	132.8	144	127.9	143.6	42	119.5	138.5	2.84524	0.00048514	3.29762	5.66633e-05
AT3G45770	Enoyl-	14	57.4	59.8	135.4	112.6	124.6	145.9	124.5	125.7	43.7333	124.2	132.033	2.83994	0.00779252	3.01905	0.00578073
AT2G24180	Cytochrome P450 71B6	0.01	62.7	66	123.2	122	120.3	138.1	137.6	130	42.9033	121.833	135.233	2.83972	0.0213189	3.15205	0.0129587
AT4G22670	FAM10 family protein At4g22670	46.5	46.9	44.2	114.5	145	130.4	125.7	114.1	132.7	45.8667	129.967	124.167	2.83358	0.000683656	2.70712	0.000140243
AT4G12720	MutT/nudix family protein	47	40.5	41.6	124.7	124.2	116.3	134.7	136.9	134	43.0333	121.733	135.2	2.82881	2.02041e-05	3.14175	1.90679e-06
AT5G64370	Beta-ureidopropionase	61.2	25.7	47.4	134.9	117.8	126	138.9	134.2	113.8	44.7667	126.233	128.967	2.81981	0.00206312	2.88086	0.00283591
AT4G21160	ZAC	29.9	42.5	44.7	92.4	97.9	139.4	133.2	184.9	135.2	39.0333	109.9	151.1	2.81554	0.0103256	3.87105	0.00307179
AT4G26070	NMAPKK	44.3	55.4	39.5	117.2	134.2	140.2	126.3	117.4	125.5	46.4	130.533	123.067	2.81322	0.00054416	2.6523	0.000153621
AT5G12130	Thylakoid membrane protein TERC, Chloroplastic	40	54.9	41.5	145.3	110.5	126.1	132	117.7	132.1	45.4667	127.3	127.267	2.79985	0.00181799	2.79912	0.000263193
AT2G25110	Stromal cell-derived factor 2-like protein	51.6	52.1	30.4	125.1	131.2	118.3	128.8	128.2	134.2	44.7	124.867	130.4	2.79344	0.000574895	2.91723	0.000317857
AT3G51660	LS1-like protein	45.9	39.7	53.3	126.9	134.4	125.8	125.5	129.4	119.1	46.3	129.033	124.667	2.7869	6.48631e-05	2.69258	9.27613e-05
AT4G11840	Phospholipase D gamma 3	39.8	47.9	47.2	136.6	106.5	132.2	141.2	122	126.7	44.9667	125.1	129.967	2.78206	0.00118875	2.89029	0.000178201
AT1G53430	Probable LRR receptor-like serine/threonine-protein kinase At1g53430	49.7	41.6	46.8	102	140	141.1	123.6	124.4	130.7	46.0333	127.7	126.233	2.77408	0.00334496	2.74222	1.62864e-05
AT5G36230	ARM repeat superfamily protein	54.7	37.6	48.9	135.4	133.4	122.8	119.7	113.9	133.5	47.0667	130.533	122.367	2.77337	0.000195074	2.59986	0.000606901
AT3G58560	Carbon catabolite repressor protein 4 homolog 1	43.8	51	46.7	111	153.2	128.2	137.1	110.8	118.3	47.1667	130.8	122.067	2.77314	0.00254056	2.58799	0.00075933
AT4G29680	Alkaline-phosphatase-like family protein	54.9	36.7	40.1	118.8	99	146.9	135.2	151.1	117.3	43.9	121.567	134.533	2.76917	0.00658124	3.06454	0.00128837
AT5G47860	Gut esterase	10.6	37.3	81.6	142.3	88.5	126.4	160.7	127.2	125.2	43.1667	119.067	137.7	2.7583	0.0439626	3.18996	0.0162617
AT5G44730	Haloacid dehalogenase-like hydrolase (HAD) superfamily protein	36.2	50	48.4	147.1	98.3	123.4	121.1	152.7	123	44.8667	122.933	132.267	2.73997	0.00611428	2.94799	0.00141635
AT2G29080	ATP-dependent zinc metalloprotease FTSH 3, Mitochondrial	41.1	57.5	50.2	164.8	120.3	122.5	113.2	108.2	122.3	49.6	135.867	114.567	2.73925	0.00479882	2.30981	0.000495184
AT1G22360	UDP-glycosyltransferase 85A2	56.2	30.1	56.3	123.5	147.8	119.2	124.4	114	128.4	47.5333	130.167	122.267	2.73843	0.00268227	2.57223	0.00153677
AT2G38880	Nuclear factor Y, Subunit B1	52.8	44.6	53	147.1	133.7	129.4	120	109.3	110.1	50.1333	136.733	113.133	2.72739	0.000134421	2.25665	0.00014019
AT1G71040	Multicopper oxidase LPR2	0.01	72.5	68.4	128.9	127.8	126.8	126.5	119.5	129.6	46.97	127.833	125.2	2.7216	0.026332	2.66553	0.0299052
AT2G45060	Alanine-tRNA ligase	49.7	50.6	44.9	119.2	143.8	131.9	116.5	117.8	125.5	48.4	131.633	119.933	2.7197	0.000341087	2.47796	2.74219e-05
AT3G56150	Eukaryotic translation initiation factor 3 subunit C	52.4	37.3	48.8	101	151.2	124.1	125.3	133.3	126.6	46.1667	125.433	128.4	2.71697	0.00645698	2.78123	9.23263e-05
AT5G56030	Heat shock protein 81-2	49.6	46.3	46.3	120.1	134.8	131.2	117.6	121.7	132.6	47.4	128.7	123.967	2.71519	5.80807e-05	2.61533	7.69242e-05
AT4G23180	Cysteine-rich receptor-like protein kinase 10	42.7	44.7	48.5	115.5	133.4	119.9	114.9	132.1	148.4	45.3	122.933	131.8	2.71376	0.000162263	2.90949	0.000916529
AT1G76405	Outer envelope pore protein 21B, Chloroplastic	0.01	66.9	77.2	137.2	105.5	145.6	109.6	132.5	125.6	48.0367	129.433	122.567	2.69447	0.039814	2.55152	0.0413135
AT2G20930	Part of multi-protein complex,	32.6	53	42.9	138.1	94.1	113.1	151.3	135.3	139.7	42.8333	115.1	142.1	2.68716	0.006751	3.31751	0.000196286
AT2G41090	Calmodulin-like protein 10	43.1	47.3	54.6	136.5	131.4	121.1	109.3	126.9	129.9	48.3333	129.667	122.033	2.68276	0.000134338	2.52483	0.000527568
AT4G16950	Disease resistance protein RPP5	35.8	57.7	44.7	73.4	141.7	154.9	152.4	89.7	149.8	46.0667	123.333	130.633	2.67728	0.041276	2.83575	0.0169108
AT2G02560	Cullin-associated NEDD8-dissociated protein 1	49.1	40.8	54.8	120.8	132.5	133.9	120.5	122.8	124.7	48.2333	129.067	122.667	2.67588	0.000154884	2.54319	6.19535e-05
AT5G51570	Hypersensitive-induced response protein 4	36.3	47.2	51.4	115.2	120.2	125.5	131.7	139.5	133	44.9667	120.3	134.733	2.67532	0.000152414	2.99629	6.14648e-05
AT4G26570	Calcineurin B-like 3	0.01	74.5	59.6	134.6	106.3	117.4	143	131.2	133.4	44.7033	119.433	135.867	2.67169	0.0366457	3.0393	0.0167314
AT4G27270	Probable NAD(P)H dehydrogenase (quinone) FQR1-like 1	43.9	45.7	42.2	124.6	110.9	116.4	138	141.3	137	43.9333	117.3	138.767	2.66995	5.76877e-05	3.15857	5.43273e-07
AT4G00970	Cysteine-rich receptor-like protein kinase 41	61.3	38.3	37	105.5	132	127.2	129.3	134.2	135.2	45.5333	121.567	132.9	2.66984	0.00258049	2.91874	0.000419022
AT2G37710	L-type lectin-domain containing receptor kinase IV.1	53.3	51.3	38.3	122.6	134.6	123.2	122.6	129	125.2	47.6333	126.8	125.6	2.662	0.000204893	2.63681	0.000103207
AT5G64430	Octicosapeptide/Phox/Bem1p family protein	27.3	46.8	58.8	117.8	120.6	115.2	125.3	140.3	148.1	44.3	117.867	137.9	2.66065	0.00138762	3.11287	0.00118255
AT1G01560	Mitogen-activated protein kinase 11	39	48.6	53.3	118.2	128.8	126.9	126.8	132.9	125.3	46.9667	124.633	128.333	2.65366	0.000128529	2.73243	7.14306e-05
AT1G63460	Probable glutathione peroxidase 8	48.7	50.1	46.8	132	134.8	118.1	134.6	158	76.9	48.5333	128.3	123.167	2.64354	0.000109531	2.53777	0.0364163
AT1G29350	Kinase-related protein of unknown function (DUF1296)	48.8	48	36.9	143.7	70	139.2	145.2	117.4	150.9	44.5667	117.633	137.833	2.63949	0.0389952	3.09274	0.00107471
AT4G23630	Reticulon-like protein	40.2	46.4	51.3	134.1	122.5	107.1	128.8	133.8	135.7	45.9667	121.233	132.767	2.63742	0.000879558	2.88832	2.20883e-05
AT1G54320	ALA-interacting subunit 3	51.3	47.9	40	94.8	145.6	126.6	130.3	124.2	139.3	46.4	122.333	131.267	2.63649	0.00750037	2.82902	0.000104206
AT1G02420	Putative pentatricopeptide repeat-containing protein At1g02420	54.9	46.1	41.7	122.9	136.9	115.3	134	122.4	125.7	47.5667	125.033	127.367	2.62859	0.000475876	2.67765	0.000104616
AT5G19240	Uncharacterized GPI-anchored protein At5g19240	39.4	47.3	52.8	118	120	128.6	139.7	125.1	129.1	46.5	122.2	131.3	2.62796	0.000117125	2.82366	0.000130733
AT5G56000	Hsp81.4	52.1	47.2	47.1	119.2	135.1	130.3	117.1	120.2	131.7	48.8	128.2	123	2.62705	9.11357e-05	2.52049	9.70792e-05
AT4G02450	Co-chaperone protein p23-1	43.4	49.9	54	138	123	125.8	122	126.2	117.6	49.1	128.933	121.933	2.62593	0.000135097	2.48337	5.14564e-05
AT5G14240	Thioredoxin superfamily protein	42.9	50.1	46.1	117.4	109.6	137.9	125.8	125.4	144.8	46.3667	121.633	132	2.62329	0.000978699	2.84687	0.000219942
AT4G14400	Protein ACCELERATED CELL DEATH 6	22	63.4	52.3	92.8	117.6	150.8	136.6	132.3	132.2	45.9	120.4	133.7	2.62309	0.0233651	2.91285	0.00213631
AT5G27560	DUF1995 domain protein, Putative (DUF1995)	36.6	56.4	60.5	140.7	112	149.1	137.1	73.9	133.7	51.1667	133.933	114.9	2.61759	0.00352716	2.2456	0.0431462
AT3G60415	Phosphoglycerate mutase family protein;(source:Araport11)	51.2	44.5	45.8	116.8	125.3	127.8	132.5	135.1	120.9	47.1667	123.3	129.5	2.61413	4.10327e-05	2.74558	6.9062e-05
AT1G47550	Exocyst complex component sec3A	60	46.8	37	125.1	147.6	102.3	138.1	123.3	119.8	47.9333	125	127.067	2.60779	0.00629358	2.6509	0.000813659
AT3G10720	Probable pectinesterase/pectinesterase inhibitor 25	51.6	49.3	43.1	117.9	111.7	145.7	117.3	142.9	120.5	48	125.1	126.9	2.60625	0.00200681	2.64375	0.000730347
AT1G20220	Alba DNA/RNA-binding protein	53.7	39.3	56.1	134	113.5	139.9	112.2	121.9	129.4	49.7	129.133	121.167	2.59826	0.00114898	2.43796	0.000588552
AT5G41790	COP1-interactive protein 1	63.5	48.7	44.2	114.3	163	129	124.3	96	117	52.1333	135.433	112.433	2.59783	0.00586595	2.15665	0.00423684
AT4G23570	Phosphatase-related	46.2	53.4	46.2	118	139.3	121	118.7	127.4	129.9	48.6	126.1	125.333	2.59465	0.000394767	2.57888	5.06883e-05
AT3G21865	PEX22	45.4	62.3	32	142.4	96.7	123.3	138.5	131	128.5	46.5667	120.8	132.667	2.59413	0.00950357	2.84896	0.000746554
AT5G55280	Cell division protein FtsZ homolog 1, Chloroplastic	25.9	70.1	45.5	111.9	129	126	139	131.6	121.1	47.1667	122.3	130.567	2.59293	0.00557113	2.7682	0.00378201
AT1G30000	Alpha-mannosidase 3	48.6	40.6	56.9	115.1	125.3	137.7	114	133.9	127.9	48.7	126.033	125.267	2.58795	0.000657095	2.57221	0.000530025
AT5G28540	Mediator of RNA polymerase II transcription subunit 37a	47.1	48.9	50.6	133	128.1	118.2	131.1	119.7	123.1	48.8667	126.433	124.633	2.58731	6.46561e-05	2.55048	2.77686e-05
AT4G22310	Mitochondrial pyruvate carrier	33	57	50.4	158.5	107.9	96.5	125.5	147.7	123.6	46.8	120.967	132.267	2.58476	0.0218879	2.82621	0.00125748
AT1G45332	Elongation factor G-1, Mitochondrial	33.6	65.1	56.7	173.6	85.7	142.3	128.2	111.7	102.9	51.8	133.867	114.267	2.5843	0.0401008	2.20592	0.00646547
AT4G38600	E3 ubiquitin-protein ligase UPL3	57.6	44.3	40.6	125.8	124.6	117.8	126	118.8	144.6	47.5	122.733	129.8	2.58386	0.000194493	2.73263	0.000885049
AT2G12190	Cytochrome P450 superfamily protein	67.1	43.2	37.7	125.3	143.6	112.8	118.5	124	127.8	49.3333	127.233	123.433	2.57905	0.00358579	2.50203	0.00141108
AT1G03400	2-oxoglutarate (2OG) and Fe(II)-dependent oxygenase superfamily protein	38.3	51.9	54	131.9	107.3	132.3	125.5	129.7	129.2	48.0667	123.833	128.133	2.57628	0.00140552	2.66574	9.58545e-05
AT2G25830	Probable transcriptional regulatory protein At2g25830	49.1	57.7	50.4	164.7	121.8	116.7	78.7	119.9	141	52.4	134.4	113.2	2.56489	0.0060635	2.16031	0.0302575
AT5G42020	Heat shock protein 70 (Hsp 70) family protein	47.8	49.4	51	132.9	128.1	118.6	130.5	119.3	122.4	49.4	126.533	124.067	2.5614	5.68772e-05	2.51147	2.74082e-05
AT3G04480	Endoribonuclease	42.1	51.2	58.8	101.3	150.9	136.1	133.5	106.7	119.5	50.7	129.433	119.9	2.55293	0.00703988	2.36489	0.00161897
AT5G59870	Probable histone H2A.7	46	35.9	53.5	142.2	71.5	131.3	144.1	174.8	100.6	45.1333	115	139.833	2.54801	0.0363304	3.09823	0.0128382
AT2G31390	Probable fructokinase-1	49.2	52.1	41.7	120.9	118.5	124.1	130.5	139	124	47.6667	121.167	131.167	2.54196	3.0303e-05	2.75175	9.73229e-05
AT4G23460	Beta-adaptin-like protein C	47.3	51.2	48.7	135.6	116.7	121.5	127.2	127.5	124.2	49.0667	124.6	126.3	2.5394	0.000198673	2.57405	9.77681e-07
AT2G02390	Glutathione S-transferase zeta 1	53.9	44.3	43.7	118.5	125.8	115.2	137.6	132.4	128.7	47.3	119.833	132.9	2.53347	9.0737e-05	2.80973	3.4005e-05
AT2G37540	NAD(P)-binding Rossmann-fold superfamily protein	46.7	46.1	56.4	116.8	134.7	124.3	155.8	86.1	133.2	49.7333	125.267	125.033	2.51877	0.000255746	2.51408	0.0223547
AT2G47730	Glutathione S-transferase F8, Chloroplastic	48.8	47.2	50.6	121.7	124	122.4	126.1	131.6	127.5	48.8667	122.7	128.4	2.51091	4.1087e-07	2.62756	2.03141e-06
AT3G29075	Glycine-rich protein	49.2	44.4	39.5	110.2	113.4	110.3	145.8	134.1	153.1	44.3667	111.3	144.333	2.50864	2.3601e-05	3.25319	8.66437e-05
AT3G19770	VPS9A	28.6	62.9	64.2	154.9	116.8	118.7	149.6	119.9	84.6	51.9	130.133	118.033	2.50739	0.0100468	2.27425	0.0402899
AT2G03510	Expressed protein	52.4	50.9	44.8	128.3	122.6	120.2	130.9	127.8	122.2	49.3667	123.7	126.967	2.50574	2.41979e-05	2.57191	2.30573e-05
AT5G54500	Flavodoxin-like quinone reductase 1	41.2	49.8	53	131.1	109.8	119.9	138.1	122.7	134.5	48	120.267	131.767	2.50556	0.000521661	2.74514	0.000136786
AT1G71220	UDP-glucose:glycoprotein glucosyltransferases;transferases, Transferring hexosyl groups;transferases, Transferring glycosyl groups	53.8	50.3	51.1	115.3	128.8	144	122.6	115.6	118.4	51.7333	129.367	118.867	2.50064	0.000747078	2.29768	8.10617e-06
AT4G34180	Cyclase-like protein 1	54.2	38.2	51	113.5	127.3	116.9	131.4	132.6	134.8	47.8	119.233	132.933	2.49442	0.000369629	2.78103	6.91405e-05
AT1G76810	Eukaryotic translation initiation factor 2 (eIF-2) family protein	56.5	63.3	43.2	109.5	159.8	136.3	101.8	87.3	142.4	54.3333	135.2	110.5	2.48834	0.00671639	2.03374	0.0326874
AT5G50680	SUMO ACTIVATING ENZYME 1B	43.2	54.2	49.9	136.9	114.7	114.9	147.4	123.3	115.5	49.1	122.167	128.733	2.48812	0.000809816	2.62186	0.00140995
AT3G16530	Lectin-like protein At3g16530	53	45.6	43.4	122.9	110.7	119.5	132	137.8	135.2	47.3333	117.7	135	2.48662	0.000111385	2.85211	1.27194e-05
AT5G12290	DGS1	32.1	55.3	57.7	122.9	115	121.7	136.1	119.9	139.3	48.3667	119.867	131.767	2.47829	0.00110557	2.72433	0.00118838
AT5G55130	Adenylyltransferase and sulfurtransferase MOCS3	35.3	50.2	59.3	141.3	100.1	114.9	129.5	127.3	142.2	48.2667	118.767	133	2.46064	0.0071807	2.75552	0.000542472
AT5G04830	Nuclear transport factor 2 (NTF2) family protein	56.7	43.5	55.2	123.9	136.2	121.6	122.8	123.3	116.7	51.8	127.233	120.933	2.45624	0.000255434	2.33462	0.000122341
AT5G53430	Histone-lysine N-methyltransferase ATX5	30.5	49.4	49.9	120.6	66.5	131	171.7	171.6	108.8	43.2667	106.033	150.7	2.45069	0.0403151	3.48305	0.00801332
AT1G31070	GlcNAc1pUT1	29.7	62.7	57.9	115.2	124.6	127.6	117.8	128.8	135.6	50.1	122.467	127.4	2.44444	0.00271749	2.54291	0.00257275
AT5G48870	SAD1	18.3	62.9	60	131.5	95.7	117.9	130.9	139.5	143.3	47.0667	115.033	137.9	2.44405	0.0187659	2.92989	0.00363287
AT3G17810	PYD1	53.1	46.1	40.6	119.7	102.7	119.2	127.7	137.7	153.1	46.6	113.867	139.5	2.44349	0.000538901	2.99356	0.000350225
AT2G38810	Probable histone H2A variant 2	46.9	57	49.5	117.4	127.2	128.5	129.3	120.3	123.9	51.1333	124.367	124.5	2.4322	9.34045e-05	2.43481	5.20303e-05
AT2G04690	Pyridoxamine 5'-phosphate oxidase family protein	66.9	56	20.2	120.8	96.4	130.5	138.9	130.6	139.8	47.7	115.9	136.433	2.42977	0.0171703	2.86024	0.00352607
AT5G07830	Heparanase-like protein 1	51.3	56.9	48.2	109.6	140.1	130.2	122.6	118.8	122.2	52.1333	126.633	121.2	2.42903	0.00133727	2.32481	1.64176e-05
AT4G25900	Glucose-6-phosphate 1-epimerase	47.6	47	52.8	121.4	117.6	119	135.6	135.5	123.6	49.1333	119.333	131.567	2.42877	5.24558e-06	2.67775	4.72978e-05
AT2G29350	SAG13	29.2	54.5	52.8	113.9	103.7	113.9	143.4	152.5	136.1	45.5	110.5	144	2.42857	0.00182549	3.16484	0.000477156
AT5G54430	Adenine nucleotide alpha hydrolases-like superfamily protein	34.2	43.2	73.8	126.6	109.2	131.1	133.6	112.9	135.4	50.4	122.3	127.3	2.42659	0.00633749	2.52579	0.00534086
AT3G23570	Alpha/beta-Hydrolases superfamily protein	30.2	54.7	63.2	128.7	120.2	110.1	124.1	114.2	154.7	49.3667	119.667	131	2.42404	0.00335328	2.65361	0.00651621
AT5G36880	Acetyl-coenzyme A synthetase, Chloroplastic/glyoxysomal	47.3	54.3	55.1	125.5	124	128.8	124.5	127.4	113.2	52.2333	126.1	121.7	2.41417	1.32472e-05	2.32993	0.000154415
AT1G18660	Zinc finger (C3HC4-type RING finger) family protein	42.6	40.3	57.8	144.2	92.8	102	154.6	142.5	123.2	46.9	113	140.1	2.40938	0.0168702	2.98721	0.000944868
AT4G29810	MAP kinase kinase 2	49.2	51.9	55.4	114	134.2	128.4	128	113.1	125.7	52.1667	125.533	122.267	2.40639	0.000304535	2.34377	0.000146279
AT1G07830	Ribosomal protein L29 family protein;(source:Araport11)	31.9	65.3	49	133.1	91.6	126.4	148.4	118.9	135.5	48.7333	117.033	134.267	2.4015	0.0131729	2.75513	0.00266843
AT5G51120	Polyadenylate-binding protein 1	44.3	51.2	52.3	109.4	127.4	118	128.8	123.2	145.6	49.2667	118.267	132.533	2.40054	0.000280086	2.69012	0.000316049
AT4G11380	Beta-adaptin-like protein	47.8	55.5	52	135.2	116.8	120.5	123.3	129.3	119.5	51.7667	124.167	124.033	2.39858	0.000278329	2.39601	3.70853e-05
AT1G07040	Plant/protein	47.9	57.6	47	128.4	107.3	128.7	122.4	153.8	106.9	50.8333	121.467	127.7	2.38951	0.000846523	2.51213	0.00565261
AT4G16990	Disease resistance protein (TIR-NBS class), Putative	52.4	55.1	53.3	123.5	122.8	137.9	109.5	128.9	116.7	53.6	128.067	118.367	2.3893	0.000116923	2.20833	0.000346166
AT5G26860	Lon protease 1	54.6	53.6	47.9	122.8	123.8	125.3	129.2	111	131.8	52.0333	123.967	124	2.38245	5.3081e-06	2.38309	0.000468811
AT5G39740	RPL5B	43.2	53.1	57.4	149.4	100.2	114.8	123.6	125	133.3	51.2333	121.467	127.3	2.37085	0.00983693	2.48471	0.000125186
AT5G51700	Cysteine and histidine-rich domain-containing protein RAR1	35.8	65.9	52.8	153.5	78.2	133.6	122.5	125.3	132.5	51.5	121.767	126.767	2.3644	0.0437195	2.46149	0.00121993
AT3G50950	Disease resistance RPP13-like protein 4	54.4	60.2	46.4	102.1	142	136.5	112	126.3	120.1	53.6667	126.867	119.467	2.36398	0.00504568	2.22609	0.000334389
AT3G02740	Eukaryotic aspartyl protease family protein	67.9	10.8	82.6	131.9	105.5	143.8	114.5	132	111	53.7667	127.067	119.167	2.3633	0.0409965	2.21637	0.0457812
AT3G47800	Aldose 1-epimerase	48.5	53.8	50.9	125.1	115.4	120.7	134.2	116.3	135.1	51.0667	120.4	128.533	2.3577	2.66934e-05	2.51697	0.000252995
AT2G37970	SOUL heme-binding family protein	48.7	45.7	52.1	120.3	107.7	116.3	132.5	136.3	140.3	48.8333	114.767	136.367	2.35017	9.18732e-05	2.79249	7.31069e-06
AT4G17830	Peptidase M20/M25/M40 family protein	63.4	51.7	42.6	133.2	118	118.5	128	128	116.6	52.5667	123.233	124.2	2.34432	0.000829268	2.36271	0.000548674
AT5G52640	Heat shock protein 90-1	60	50.4	48.5	113.4	132	127	117.2	120.5	130.9	52.9667	124.133	122.867	2.34361	0.000419343	2.3197	0.000213114
AT1G72930	Toll/interleukin-1 receptor-like protein	51.6	53.6	52.1	132.1	112.4	123.6	122.2	125.6	126.8	52.4333	122.7	124.867	2.34011	0.000255041	2.38144	1.10903e-06
AT3G25070	RPM1 interacting protein 4	33.8	57.5	54.7	129.7	100.2	111.7	127.4	137.9	147.2	48.6667	113.867	137.5	2.33973	0.00460147	2.82534	0.000703162
AT5G42950	GYF domain-containing protein	58.6	52.1	39.3	156.3	79.9	114.6	119	139.9	140.3	50	116.933	133.067	2.33867	0.0425816	2.66133	0.000777299
AT4G21100	DNA damage-binding protein 1b	45.5	39.4	71.7	135	132.2	98.9	125.5	121.1	130.9	52.2	122.033	125.833	2.3378	0.0101925	2.4106	0.00202943
AT2G17120	LysM domain-containing GPI-anchored protein 2	58.3	47.1	48.7	120.1	118.8	121.3	131.2	128	126.5	51.3667	120.067	128.567	2.33744	4.30243e-05	2.50292	3.33033e-05
AT1G20510	4-coumarate--CoA ligase-like 5	44.9	55.6	54.4	122.6	119.4	119.9	133.1	119.7	130.5	51.6333	120.633	127.767	2.33635	4.02737e-05	2.4745	0.000138351
AT1G44920	T12C22.21 protein	51.4	47.5	57.8	166.6	101.7	97.7	101.9	154.9	120.5	52.2333	122	125.767	2.33567	0.0363443	2.40779	0.00965888
AT5G44070	Phytochelatin synthase gene	54.3	55.2	47.4	124.6	120	121.7	126.1	127.6	123.1	52.3	122.1	125.6	2.33461	1.55018e-05	2.40153	1.25877e-05
AT4G34450	Coatomer subunit gamma	53	52.9	53.9	129.6	120.3	122.7	126.5	121.3	119.6	53.2667	124.2	122.467	2.33166	1.45314e-05	2.29912	5.05504e-06
AT3G12640	RNA binding (RRM/RBD/RNP motifs) family protein	64.8	44.3	46.2	122	133.3	106.3	120.8	116.6	145.6	51.7667	120.533	127.667	2.3284	0.00252349	2.46619	0.00244517
AT1G62020	Coatomer subunit alpha	56.3	53.7	54	125.7	131.3	124.2	122.6	106.3	125.8	54.6667	127.067	118.233	2.32439	6.19007e-06	2.1628	0.000476992
AT5G54870	Inositol-1,4,5-trisphosphate 5-phosphatase	51.5	52.1	56.3	130.5	121.1	118.4	115.2	157.6	97.3	53.3	123.333	123.367	2.31395	6.04003e-05	2.31457	0.017469
AT2G17130	Isocitrate dehydrogenase	52.4	56.2	52.5	133.2	121	118.3	123.4	132.7	110.2	53.7	124.167	122.1	2.31223	0.000120303	2.27374	0.000502798
AT2G21390	Coatomer subunit alpha-2	54.5	52.3	56	124.4	131.6	120.3	131	104.8	125	54.2667	125.433	120.267	2.31143	3.34993e-05	2.21622	0.00117603
AT3G46510	U-box domain-containing protein 13	43.7	59.4	50.1	138.1	106.9	108.6	119.3	142.2	131.7	51.0667	117.867	131.067	2.30809	0.00384879	2.56658	0.000571827
AT4G36945	PLC-like phosphodiesterases superfamily protein	48.8	46.4	55.2	122.8	111.3	112.2	143	135.2	125.2	50.1333	115.433	134.467	2.30253	0.000134759	2.68218	0.000128553
AT1G69190	Folate synthesis bifunctional protein	51.9	47.2	60	101.8	118.6	145.8	115.4	119.5	139.6	53.0333	122.067	124.833	2.3017	0.00665319	2.35387	0.00100973
AT3G08510	Phosphoinositide phospholipase C	79.2	38.5	41.2	130.8	124.3	110.3	118.7	121.4	135.5	52.9667	121.8	125.2	2.29956	0.00891439	2.36375	0.00693212
AT3G57150	Encodes a putative pseudouridine synthase (NAP57).	70	53.9	42.2	101.1	154.3	126.4	120.1	110.7	121.3	55.3667	127.267	117.367	2.29862	0.0143256	2.11981	0.00207433
AT5G38990	Probable receptor-like protein kinase At5g38990	51.6	49.1	49.3	122.8	119.5	101.7	138.1	142.2	125.6	50	114.667	135.3	2.29333	0.00060884	2.706	7.23765e-05
AT4G01370	Mitogen-activated protein kinase 4	49.1	52.7	57.6	118.3	122.6	124.1	125.4	124.2	126	53.1333	121.667	125.2	2.28984	2.21811e-05	2.35634	8.89051e-06
AT1G72680	Cinnamyl-alcohol dehydrogenase;(source:Araport11)	46	53.1	52.2	121.6	102.6	122	138.2	143.5	120.8	50.4333	115.4	134.167	2.28817	0.00066246	2.66028	0.000314202
AT5G20950	Glycosyl hydrolase family protein	49.8	54.4	54.3	124.3	115.6	122	133	121.3	125.3	52.8333	120.633	126.533	2.28328	2.30826e-05	2.39495	3.96791e-05
AT1G11910	Aspartic proteinase A1	50.2	47.8	58.3	117.1	118.5	121.2	131.2	135.5	120.3	52.1	118.933	129	2.28279	3.93533e-05	2.47601	0.000154793
AT5G19620	Outer envelope protein 80, Chloroplastic	55.5	50.6	53.7	131.9	126.5	106.2	127.3	122.1	126.3	53.2667	121.533	125.233	2.2816	0.00101205	2.35106	4.67574e-06
AT5G18170	Glutamate dehydrogenase	55.2	52.2	54	113.9	125.4	128.3	127.2	120	123.9	53.8	122.533	123.7	2.27757	0.00010554	2.29926	6.46648e-06
AT4G08230	Glycine-rich protein	53.5	58.1	27.5	120.9	80.9	114.9	157.3	124.8	162.1	46.3667	105.567	148.067	2.27678	0.0195113	3.19339	0.00253211
AT4G34950	Major facilitator superfamily protein	59.7	59.7	48	112	145.7	122.9	128.6	111.7	111.6	55.8	126.867	117.3	2.2736	0.00263685	2.10215	0.000859135
AT3G09810	Isocitrate dehydrogenase	56.3	51.8	47	127.1	102.3	123.1	129.1	137	126.3	51.7	117.5	130.8	2.27273	0.00127418	2.52998	4.59361e-05
AT1G18260	ERAD-associated E3 ubiquitin-protein ligase component HRD3A	77.1	36.5	50.4	109.4	137.2	125	133.1	106	125.4	54.6667	123.867	121.5	2.26585	0.00856075	2.22256	0.00968923
AT4G39640	Glutathione hydrolase 1	42.8	57.3	49.9	120.7	96.9	122.2	141.3	138.3	130.5	50	113.267	136.7	2.26533	0.00234473	2.734	8.05564e-05
AT2G42790	Citrate synthase	24.4	68.2	70.9	112.8	121.5	136	125.6	123.6	117.1	54.5	123.433	122.1	2.26483	0.0139993	2.24037	0.0114926
AT2G15860	BAT2 domain protein	57	76.2	35.3	114.5	133.4	133.7	95.1	108	146.7	56.1667	127.2	116.6	2.26469	0.006104	2.07596	0.0362074
AT5G16510	Glycosyltransferase (Fragment)	51.2	53.6	65.3	136.3	115.3	133.5	108.9	122.8	113	56.7	128.367	114.9	2.26396	0.000815896	2.02646	0.000631366
AT1G02090	COP9 signalosome complex subunit 7	60.8	47.7	54.2	120.2	120	128.1	135.1	109.7	124.1	54.2333	122.767	122.967	2.26368	0.000121036	2.26736	0.00114451
AT3G25520	Ribosomal protein L5 t	47.9	54.9	58.1	146.8	101.8	115.6	120.1	124	130.8	53.6333	121.4	124.967	2.26352	0.00767432	2.33002	8.03066e-05
AT2G33040	ATP synthase subunit gamma, Mitochondrial	51.4	53.9	55.2	138.2	108.9	115.1	126.2	138.1	113	53.5	120.733	125.767	2.2567	0.00170507	2.35078	0.000595076
AT4G20830	Berberine bridge enzyme-like 19	55.4	54.1	53.7	112.9	131.3	123.7	130.6	116.7	121.6	54.4	122.633	122.967	2.25429	0.000219836	2.26042	7.50983e-05
AT3G60600	Vesicle-associated protein 1-1	68.4	35.9	57.8	130.5	112.9	120.9	127	126.4	120.3	54.0333	121.433	124.567	2.24738	0.00340293	2.30537	0.00197915
AT1G80460	Glycerol kinase	50	55.5	54.4	117.6	118.3	123.2	121.1	133.5	126.4	53.3	119.7	127	2.24578	1.07453e-05	2.38274	4.93421e-05
AT1G22510	E3 ubiquitin-protein ligase RNF170-like protein (DUF 1232)	37.2	56.4	72.7	104.3	137.9	131	121.3	111.8	127.6	55.4333	124.4	120.233	2.24414	0.0089274	2.16897	0.00449256
AT1G48210	Protein kinase superfamily protein	60.1	53.8	54.5	121.6	131.6	124.2	127.1	118.8	108.3	56.1333	125.8	118.067	2.24109	4.19524e-05	2.10333	0.000433747
AT2G18770	P-loop containing nucleoside triphosphate hydrolases superfamily protein	52	65.5	46.3	129	122.1	115.7	102.7	128.2	138.6	54.6	122.267	123.167	2.23932	0.000594994	2.2558	0.00476678
AT2G33410	Putative RNA-binding protein	51.1	58.5	61.5	136.7	136	108.4	106.7	124.8	116.2	57.0333	127.033	115.9	2.22735	0.00204612	2.03214	0.000633763
AT3G51000	Alpha/beta-Hydrolases superfamily protein;(source:Araport11)	55.4	54.2	55.9	114.6	134.3	119.2	120.7	122.4	123.3	55.1667	122.7	122.133	2.22417	0.000348404	2.2139	2.08031e-07
AT5G25250	Flotillin-like protein 1	59.3	49.9	53.7	116.8	124.9	120.5	128.5	119.5	126.8	54.3	120.733	124.933	2.22345	5.05434e-05	2.3008	5.36905e-05
AT2G04400	Indole-3-glycerol phosphate synthase, Chloroplastic	37.6	56.2	71.1	105.3	159.1	101.5	126.3	129.6	113.3	54.9667	121.967	123.067	2.21892	0.0330665	2.23893	0.00333786
AT4G15530	Pyruvate, Phosphate dikinase 1, Chloroplastic	55.2	50.7	55	120.6	119.6	116.6	129.2	126.2	126.9	53.6333	118.933	127.433	2.21753	4.25007e-06	2.37601	1.78436e-06
AT2G40290	Eukaryotic translation initiation factor 2 subunit alpha homolog	56.5	54.4	57.6	133.5	125.8	114	119.9	114.1	124.2	56.1667	124.433	119.4	2.21543	0.00028776	2.12582	3.29543e-05
AT3G59010	Pectinesterase	30.9	70.2	63.4	133.1	126.7	104.2	126.3	125.4	119.8	54.8333	121.333	123.833	2.21277	0.0112933	2.25836	0.00495477
AT3G15356	Lectin-like protein LEC	57.2	57.4	44.5	125.2	112.9	113.8	121.2	138.8	129	53.0333	117.3	129.667	2.21182	0.000382521	2.445	0.000322509
AT3G47000	Glycosyl hydrolase family protein;(source:Araport11)	56.9	46.7	53.6	97.3	115.4	134.8	143.6	115.2	136.6	52.4	115.833	131.8	2.21056	0.00484891	2.51527	0.000932782
AT5G49760	Leucine rich receptor kinase. Encodes a receptor of extracellular reactive oxygen species.	64.8	49.3	51.8	122.7	128	115.6	123.2	118.6	125.9	55.3	122.1	122.567	2.20796	0.000370111	2.2164	0.000214816
AT4G00570	NAD-dependent malic enzyme 2, Mitochondrial	57.2	51.5	53.7	130.8	106.3	121.4	129.2	129.6	120.3	54.1333	119.5	126.367	2.20751	0.00087255	2.33436	3.10954e-05
AT1G79990	Coatomer subunit beta'	56	62.5	51.6	99.7	150.4	124.8	119.6	108	127.5	56.7	124.967	118.367	2.204	0.0103479	2.0876	0.000683824
AT1G33680	KH domain-containing protein	45.5	81.7	38.8	142	100.5	123.2	153.2	108.5	106.8	55.3333	121.9	122.833	2.20301	0.0206074	2.21988	0.0288235
AT4G05390	Ferredoxin--NADP reductase, Root isozyme 1, Chloroplastic	53.3	51.2	49.6	140.5	74.1	124.3	125.8	138.1	143.2	51.3667	112.967	135.7	2.19922	0.0370246	2.64179	8.94455e-05
AT1G06130	GLX2-4	48.4	46.8	69.3	126.3	107.2	128.1	119.8	124.9	129.2	54.8333	120.533	124.633	2.19818	0.00263688	2.27295	0.00083756
AT2G35940	BEL1-like homeodomain protein 1	42.5	55	67.9	123	144	96.1	118.2	127.8	125.4	55.1333	121.033	123.8	2.19528	0.0136718	2.24547	0.00095496
AT4G11260	SGT1B	52.3	60.3	53.6	124.2	119.4	120.7	128.1	115.5	125.9	55.4	121.433	123.167	2.19194	2.09443e-05	2.22323	0.000124499
AT5G03630	Monodehydroascorbate reductase 2	53.6	57	54.4	115.3	122.2	123.7	126.1	122.7	125	55	120.4	124.6	2.18909	1.943e-05	2.26545	1.07848e-06
AT5G39730	AIG2-like protein B	25.6	66.8	68	140.2	90.9	118.8	127.4	135.4	127	53.4667	116.633	129.933	2.18142	0.0339758	2.43017	0.00575474
AT5G08380	Alpha-galactosidase 1	39.9	71.4	40.4	120.8	91.3	118.8	144.4	143.4	129.6	50.5667	110.3	139.133	2.18128	0.0133358	2.75148	0.00150948
AT4G20850	Tripeptidyl Peptidase II	58.2	55.4	53	123.9	116.4	122.9	121.5	125.6	123.2	55.5333	121.067	123.433	2.18007	1.94828e-05	2.22269	3.78641e-06
AT2G47470	UNE5	59.3	54.2	53.3	121.1	126.1	116	125.9	120.5	123.6	55.6	121.067	123.333	2.17746	4.61033e-05	2.21823	9.9644e-06
AT5G58100	Membrane protein involved in pollen nexine and sexine development.	42.3	67.1	56.8	120.8	111.8	127.9	120.8	120.3	132.2	55.4	120.167	124.433	2.16907	0.00164285	2.24609	0.00107768
AT3G10380	SEC8	63.4	56.8	48.2	148	108.8	108.2	130.9	122.8	112.9	56.1333	121.667	122.2	2.16746	0.00917035	2.17696	0.000633977
AT3G24503	Aldehyde dehydrogenase family 2 member C4	53.1	53.8	58.3	122.6	112.3	121.8	128.7	126	123.4	55.0667	118.9	126.033	2.1592	6.53576e-05	2.28874	5.86455e-06
AT5G35080	OS9	52.9	61.7	41.8	129.9	94.7	112.6	152.2	116.2	138.1	52.1333	112.4	135.5	2.15601	0.00669788	2.5991	0.0022212
AT3G47810	Vacuolar protein sorting-associated protein 29	38.8	65.4	58.8	128.4	102.2	120.6	143.8	100.4	141.6	54.3333	117.067	128.6	2.1546	0.00490474	2.36687	0.0101985
AT1G72330	Alanine aminotransferase 2	55.2	58	51.2	125.1	115.8	113.3	127.5	130.9	123.2	54.8	118.067	127.2	2.1545	0.000102577	2.32117	1.6938e-05
AT4G14710	1,2-dihydroxy-3-keto-5-methylthiopentene dioxygenase	43.3	56.8	62.2	109.9	119.1	118.2	118.8	130.6	141	54.1	115.733	130.133	2.13925	0.000625984	2.40542	0.0008746
AT3G63080	Probable glutathione peroxidase 5	50.1	67.6	55.4	93.2	133.9	142.3	104.5	129.4	123.6	57.7	123.133	119.167	2.13403	0.0150513	2.06528	0.00253985
AT1G06290	Acyl-coenzyme A oxidase 3, Peroxisomal	51	55.6	59.9	122.1	113.7	119	129.5	127.1	121.9	55.5	118.267	126.167	2.13093	6.02538e-05	2.27327	3.20678e-05
AT1G53645	Transmembrane protein;(source:Araport11)	53	62.6	53.8	139.3	108.7	112.7	127.2	107.6	135.1	56.4667	120.233	123.3	2.12928	0.00319942	2.18359	0.00156717
AT2G28450	Zinc finger CCCH domain-containing protein 24	56.2	55.2	54.8	117.2	109.9	126.6	138.1	106.4	135.5	55.4	117.9	126.667	2.12816	0.000209351	2.2864	0.002183
AT5G03290	Isocitrate dehydrogenase	62.3	51.5	50.1	118.8	102.4	127.6	124.7	137.6	124.9	54.6333	116.267	129.067	2.12813	0.00177939	2.36242	0.00020547
AT2G39970	Peroxisomal nicotinamide adenine dinucleotide carrier	63.6	69.1	42.7	119.3	123.7	129.5	129.4	117.1	105.6	58.4667	124.167	117.367	2.12372	0.00155417	2.00741	0.0050958
AT4G01870	TolB protein-related	41.8	64.8	61.8	135	103.2	119.1	131.2	116.4	126.7	56.1333	119.1	124.767	2.12173	0.0057234	2.22268	0.00124617
AT1G53210	Sodium/calcium exchanger NCL	41.9	49	59.1	110	102.2	105.7	150.7	142.7	138.6	50	105.967	144	2.11933	0.000516646	2.88	0.000105226
AT5G23390	Polygalacturonase inhibitor (DUF639);(source:Araport11)	56	64.8	48.7	105.3	94	159	117.5	103.7	150.8	56.5	119.433	124	2.11386	0.0377523	2.19469	0.0101741
AT3G08530	Clathrin heavy chain 2	55.5	57.9	58.2	116.3	123.9	122	117.4	127.6	121.3	57.2	120.733	122.1	2.11072	1.28859e-05	2.13462	3.0447e-05
AT4G33910	Probable prolyl 4-hydroxylase 9	82.7	25.3	61.9	103.3	119.1	135.9	132.3	143.3	96.2	56.6333	119.433	123.933	2.10889	0.0309514	2.18835	0.0376763
AT4G35230	Serine/threonine-protein kinase BSK1	58.5	55.9	51.7	113.6	107.8	128.6	132	126.4	125.6	55.3667	116.667	128	2.10716	0.00070738	2.31186	1.35833e-05
AT3G45310	Thiol protease aleurain-like	52.7	57.1	54.8	116.1	118.4	112.1	121.8	130	137	54.8667	115.533	129.6	2.10571	1.09838e-05	2.36209	8.20253e-05
AT5G20920	Eukaryotic translation initiation factor 2 subunit beta	52.9	60.4	62.6	120.5	133	116.5	125	112.5	116.5	58.6333	123.333	118	2.10347	0.000360687	2.01251	0.000228474
AT4G04720	Calcium-dependent protein kinase 21	43.3	72.3	46.8	113.2	110.1	116.8	125.3	132.8	139.4	54.1333	113.367	132.5	2.09421	0.00316867	2.44766	0.00143504
AT1G48620	HIGH MOBILITY GROUP A5, HON5	46.1	64.4	64	133.7	116.6	115	128.8	94.4	137.1	58.1667	121.767	120.1	2.09341	0.00170504	2.06476	0.0126278
AT3G56310	Alpha-galactosidase 3	52.7	56.3	57.7	124.8	109.8	112.9	126.1	134	125.7	55.5667	115.833	128.6	2.08458	0.000233114	2.31434	1.88926e-05
AT5G08040	Mitochondrial import receptor subunit TOM5-like protein	65.7	46.1	65.2	125.4	115.3	127.8	130.2	114.7	109.7	59	122.833	118.2	2.08192	0.0010468	2.00339	0.00268359
AT4G21580	Zinc-binding dehydrogenase family protein	53.2	57.6	60.5	119.8	115.6	120.5	125	121.4	126.4	57.1	118.633	124.267	2.07764	1.93718e-05	2.1763	1.31861e-05
AT2G43790	Mitogen-activated protein kinase	53.3	59	55.8	117.1	113.4	118.6	133.8	128.2	120.9	56.0333	116.367	127.633	2.07674	1.17091e-05	2.27781	6.20807e-05
AT1G79280	Nuclear pore anchor	54.8	56.5	53.1	97.6	102.2	141.6	140.2	104.1	150	54.8	113.8	131.433	2.07664	0.0135321	2.39842	0.00540792
AT2G20190	CLIP-associated protein	51.9	67.6	52.3	137.9	104.5	114.2	92.5	149	130.2	57.2667	118.867	123.9	2.07567	0.00530329	2.16356	0.0186151
AT5G14030	Translocon-associated protein subunit beta	55.9	60.2	57.3	125.3	113.4	120.7	122.6	128.8	115.7	57.8	119.8	122.367	2.07266	7.34359e-05	2.11707	8.52919e-05
AT3G13990	Dentin sialophosphoprotein, Putative (DUF1296);(source:Araport11)	51	57.8	53.1	115.3	109.1	111	132.9	124.6	145.2	53.9667	111.8	134.233	2.07165	2.89762e-05	2.48734	0.000220366
AT3G60440	Phosphoglycerate mutase family protein	61.2	49.8	59.3	111.4	118	122.4	125.8	136.4	115.6	56.7667	117.267	125.933	2.06577	0.000220619	2.21844	0.000576921
AT5G64570	Beta-D-xylosidase 4	63.4	68.6	42.7	105.3	146.3	109.2	129.6	112.9	122	58.2333	120.267	121.5	2.06525	0.0153293	2.08643	0.00240721
AT1G59870	ABC transporter G family member 36	59.4	56.6	59.9	116.7	129.7	116.8	123.2	115.8	121.9	58.6333	121.067	120.3	2.06481	0.000148062	2.05173	1.60709e-05
AT1G27330	Ribosome associated membrane protein RAMP4;(source:Araport11)	53.8	56.1	64.8	104.8	142.9	112.6	116.1	124.1	124.8	58.2333	120.1	121.667	2.06239	0.00690662	2.0893	0.000129789
AT4G26910	Dihydrolipoyllysine-residue succinyltransferase component of 2-oxoglutarate dehydrogenase complex 2, Mitochondrial	58.2	55.2	61.6	122.8	119.5	118.3	130.3	118.4	115.8	58.3333	120.2	121.5	2.06057	1.10921e-05	2.08286	0.000197557
AT5G19860	Transmembrane protein	50.4	60.9	60.9	122.1	107.7	124.8	130.2	118.2	124.9	57.4	118.2	124.433	2.05923	0.000667908	2.16783	0.000169379
AT1G34220	Regulator of Vps4 activity in the MVB pathway protein	45.7	43.1	71.4	114	88.8	126.6	131.6	142.9	135.9	53.4	109.8	136.8	2.05618	0.0169779	2.5618	0.000971349
AT1G62390	Protein CLMP1	53.7	61	60.4	142.6	113.1	103.1	101.4	127.7	137.1	58.3667	119.6	122.067	2.04911	0.00714689	2.09138	0.00432812
AT1G06220	110 kDa U5 small nuclear ribonucleoprotein component CLO	68.5	63.3	39.8	115.3	122.4	113.1	121.6	141.1	114.9	57.2	116.933	125.867	2.04429	0.00297731	2.20047	0.00436807
AT5G36890	Beta-glucosidase 42	59.1	65.9	48.2	137.9	94.3	121.1	114.2	147.2	112.1	57.7333	117.767	124.5	2.03984	0.0118646	2.15647	0.00588702
AT2G26740	Soluble epoxide hydrolase	54.7	53.9	59.9	96.9	113.2	133	135.8	140.4	112.1	56.1667	114.367	129.433	2.0362	0.00537147	2.30445	0.00122179
AT3G03060	P-loop containing nucleoside triphosphate hydrolases superfamily protein	57.5	52.7	41.8	120	92	97.5	160.2	124	154.4	50.6667	103.167	146.2	2.03618	0.00573709	2.88553	0.0014132
AT1G73430	Sec34-like family protein	45.7	55.3	71.6	132	111.2	107.9	125.4	123.6	127.3	57.5333	117.033	125.433	2.03418	0.00508576	2.18019	0.000883278
AT5G56940	30S ribosomal protein S16-2, Chloroplastic/mitochondrial	38.8	77	56.8	130.6	101.3	118.4	128.2	114	135	57.5333	116.767	125.733	2.02955	0.0131235	2.1854	0.00572441
AT4G31180	Aspartate--tRNA ligase 2, Cytoplasmic	62.7	54.7	60.4	119.2	126.8	114.5	116.8	122.1	122.8	59.2667	120.167	120.567	2.02756	0.000144382	2.03431	3.57087e-05
AT3G15980	Coatomer subunit beta'	61.3	59.5	54	100.6	135.7	116.7	121.9	105.5	144.8	58.2667	117.667	124.067	2.01945	0.00461334	2.12929	0.00477409
AT3G15180	ARM repeat superfamily protein	45.2	74.4	50.9	107.3	117.7	118.7	122.6	134	129.1	56.8333	114.567	128.567	2.01584	0.00392503	2.26217	0.00166571
AT2G34040	Apoptosis inhibitory protein 5 (API5)	61.4	57.5	55.5	130.7	127.8	92.4	120.7	128	126	58.1333	116.967	124.9	2.01204	0.00909074	2.14851	1.79011e-05
AT3G23820	UDP-glucuronate 4-epimerase 6	164.6	135.3	152	65.9	108.7	50.7	74.3	63.9	84.6	150.633	75.1	74.2667	0.498562	0.0174182	0.493029	0.00181728
AT4G33580	Beta carbonic anhydrase 5	203.2	157.7	168.5	65.7	102.7	92.6	109.7	0.01	0.01	176.467	87	36.5733	0.493011	0.00708658	0.207253	0.0231265
AT5G04440	Galactose-binding-like domain protein	195.9	130.9	140.3	69.8	65.3	95.1	83.1	57.8	61.7	155.7	76.7333	67.5333	0.492828	0.0239976	0.43374	0.015438
AT5G44410	Berberine bridge enzyme-like 27	157.9	147.9	172.5	73	91.4	71.2	60.6	61.2	64.3	159.433	78.5333	62.0333	0.492578	0.00109739	0.389086	0.000176055
AT3G61430	PIP1A	162.2	160.6	129.3	72	69.9	80	78.8	70.9	76.3	150.7	73.9667	75.3333	0.490821	0.00233097	0.499889	0.00234374
AT2G45960	Plasma membrane intrinsic protein 1B	152.9	154.7	145.4	75.3	68.4	77.6	77.1	74.6	74	151	73.7667	75.2333	0.488521	4.111e-05	0.498234	1.46307e-05
AT1G62180	5'-adenylylsulfate reductase 2, Chloroplastic	152.9	168.7	155.5	75.9	77.2	79.1	67.4	60.1	63.3	159.033	77.4	63.6	0.48669	8.09959e-05	0.399916	5.71009e-05
AT3G51240	Naringenin,2-oxoglutarate 3-dioxygenase	153.1	157.9	182.7	105	86.5	48.1	45.1	75.4	46	164.567	79.8667	55.5	0.485315	0.011388	0.337249	0.00128791
AT3G15480	Plant-specific protein that promotes trafficking of CSCs to the plasma membrane	149.2	175.6	155.2	76.6	76.9	76.5	87.3	0.01	102.7	160	76.6667	63.3367	0.479167	0.000477633	0.395854	0.0426857
AT2G32500	Stress responsive alpha-beta barrel domain protein;(source:Araport11)	118.2	164.2	175.1	66.1	106.1	46.1	70.6	68.6	85.1	152.5	72.7667	74.7667	0.477158	0.0324402	0.490273	0.0129267
AT1G01620	TMP-B	167.1	162.9	132.5	68.4	71.2	79.8	75.8	69.4	72.9	154.167	73.1333	72.7	0.474378	0.00208861	0.471568	0.00180811
AT5G65840	Thioredoxin superfamily protein	174.7	139	142.8	67.1	74.3	74.4	75	76.9	75.8	152.167	71.9333	75.9	0.472727	0.00227429	0.498795	0.0025402
AT1G36280	Adenylosuccinate lyase	167.3	166.4	159.8	76.2	77	79.4	57.8	55.5	60.6	164.5	77.5333	57.9667	0.471327	4.42593e-06	0.352381	2.79545e-06
AT5G66600	Putative uncharacterized protein	114.6	187.2	163.1	65.7	90.8	62.6	64	70.9	81	154.967	73.0333	71.9667	0.471284	0.0239985	0.464401	0.0193041
AT5G65730	Xyloglucan endotransglucosylase/hydrolase	156.3	160	157.2	63.5	85.7	72.5	62.1	75.6	67.1	157.833	73.9	68.2667	0.468215	0.000212782	0.432524	2.58551e-05
AT5G60540	PDX2	151.1	159	153.4	69.8	80.8	66.2	67.8	65.6	86.5	154.5	72.2667	73.3	0.467745	7.86857e-05	0.474434	0.000321468
AT1G75680	Endoglucanase 10	155.4	163.5	156.4	75	58.3	88.9	67.7	68.3	66.6	158.433	74.0667	67.5333	0.467494	0.000787092	0.426257	3.98106e-06
AT2G37170	Plasma membrane intrinsic protein 2	170	153.2	147.4	64.6	74.7	80.1	68.2	68.4	73.3	156.867	73.1333	69.9667	0.466213	0.000508127	0.446026	0.000239212
AT4G18440	Adenylosuccinate lyase	165	164.8	157.5	73.1	76.1	73.9	64.8	59.9	64.8	162.433	74.3667	63.1667	0.457829	4.71037e-06	0.388877	4.70909e-06
AT4G21990	5'-adenylylsulfate reductase 3, Chloroplastic	180.6	165.5	154.6	65.6	76.8	75.8	64.1	60	57	166.9	72.7333	60.3667	0.43579	0.000351341	0.361694	0.0001676
AT3G45970	Expansin-like A1	189.4	146.5	171.6	58.8	80.6	81.3	46.5	61.1	64.2	169.167	73.5667	57.2667	0.434877	0.00272079	0.338522	0.0011855
AT2G35860	FLA16	167	158.7	186.8	76.3	71.9	71.6	53.9	48.5	65.3	170.833	73.2667	55.9	0.428878	0.00032468	0.32722	0.000289898
AT5G06130	Protein ORANGE-LIKE, Chloroplastic	177.9	192.2	190.6	53.9	134.2	43.6	39.6	38.4	29.6	186.9	77.2333	35.8667	0.413233	0.0193939	0.191903	1.05631e-05
AT3G53420	PIP2A	175.3	168.7	159	62	79	65.2	65.8	60.9	64.2	167.667	68.7333	63.6333	0.40994	0.000149081	0.379523	3.02605e-05
AT5G42650	Allene oxide synthase, Chloroplastic	165.3	157.4	158.2	69.2	59.7	67.5	75.8	74.7	72.3	160.3	65.4667	74.2667	0.408401	1.61975e-05	0.463298	5.91115e-06
AT4G37800	Probable xyloglucan endotransglucosylase/hydrolase protein 7	169.8	160.5	169.9	63.1	69.8	65.6	58.6	74.3	68.4	166.733	66.1667	67.1	0.396841	1.06518e-05	0.402439	5.61417e-05
AT2G22240	Inositol-3-phosphate synthase isozyme 2	171.6	165.2	183.2	51.1	95.7	56.6	39.2	40.3	97.2	173.333	67.8	58.9	0.391154	0.00214864	0.339808	0.00450435
AT1G32900	Granule-bound starch synthase 1, Chloroplastic/amyloplastic	172	162.6	176.5	69.5	64.1	64.9	65.8	62.3	62.3	170.367	66.1667	63.4667	0.388378	1.93168e-05	0.37253	1.49418e-05
AT1G07440	Tropinone reductase homolog At1g07440	179.3	170.6	153.7	67.6	59.8	67.6	79.7	60.5	61.2	167.867	65	67.1333	0.387212	0.000206036	0.399921	0.000504793
AT1G22530	Patellin-2	178.4	171.2	168.5	65.7	70.4	59.2	62.1	65.7	58.9	172.7	65.1	62.2333	0.376954	1.64441e-05	0.360355	6.34079e-06
AT2G07050	Cycloartenol synthase	169.6	181.1	180.4	75.5	74.4	49.8	65.5	54	49.7	177.033	66.5667	56.4	0.376012	0.000273206	0.318584	3.63157e-05
AT5G15970	KIN2	179.1	167.9	158.4	65.8	63.1	60.2	67.1	65.9	72.5	168.467	63.0333	68.5	0.374159	6.99867e-05	0.406609	9.31903e-05
AT3G50270	Anthranilate N-hydroxycinnamoyl/benzoyltransferase-like protein	243.9	168.6	184.4	20.7	102.7	97	31.3	27.3	24.1	198.967	73.4667	27.5667	0.369241	0.02303	0.138549	0.00173774
AT1G72150	Patellin-1	178	178.8	165.2	61.8	65.1	62.8	60.5	63.5	64.3	174	63.2333	62.7667	0.36341	1.63535e-05	0.360728	1.66899e-05
AT4G23670	Polyketide cyclase	166.1	168.8	156.3	57.8	57.8	61.7	75.2	78.8	77.6	163.733	59.1	77.2	0.360953	1.28669e-05	0.471498	2.54916e-05
AT5G13050	5-formyltetrahydrofolate cyclo-ligase, Mitochondrial	169.2	175.6	173.9	61.8	114.1	0.01	79.2	61	65.2	172.9	58.6367	68.4667	0.339136	0.0258284	0.39599	5.69011e-05
AT5G15960	Stress-induced protein KIN1	174	177.2	174.4	59.3	65.7	51.6	61.7	63.3	72.7	175.2	58.8667	65.9	0.335997	1.00918e-05	0.376142	6.82484e-06
AT5G44520	NagB/RpiA/CoA transferase-like superfamily protein	219.8	184.7	166.7	54.2	78.3	47.3	53.7	46.5	48.9	190.4	59.9333	49.7	0.314776	0.00200664	0.261029	0.000864975
AT1G49660	Probable carboxylesterase 5	161.4	239.4	158	26.3	61.8	85.2	88.8	49.1	29.9	186.267	57.7667	55.9333	0.310129	0.0153021	0.300286	0.0147794
AT5G52310	Low-temperature-induced 78 kDa protein	190.2	169.6	191.1	85.8	52.8	27.1	31.7	64.6	87.1	183.633	55.2333	61.1333	0.300781	0.00221001	0.33291	0.00221658
AT3G10940	Phosphoglucan phosphatase LSF2, Chloroplastic	181.5	164.4	210	67.9	39.6	48.5	44.7	74.7	68.7	185.3	52	62.7	0.280626	0.00105677	0.33837	0.00161603
AT5G48790	LOW PSII ACCUMULATION protein (DUF1995);(source:Araport11)	201.5	201.9	189.7	44.3	70.7	51.1	72.1	0.01	68.7	197.7	55.3667	46.9367	0.280054	8.8126e-05	0.237414	0.00319056
AT5G61130	PLASMODESMATA CALLOSE-BINDING PROTEIN 1	174.2	196.8	212.2	36.8	49.2	73.8	48.2	49.5	59.2	194.4	53.2667	52.3	0.274005	0.00080523	0.269033	0.00025226
AT1G78020	FCS-Like Zinc finger 6	277.5	175.2	191.4	0.01	86.6	70.7	98.6	0.01	0.01	214.7	52.4367	32.8733	0.244232	0.0172909	0.153113	0.0164103
AT1G30690	Patellin-4	208.1	163.3	186.4	0.01	129.6	0.01	79	17.2	116.3	185.933	43.2067	70.8333	0.232377	0.0340122	0.380961	0.0220532
AT4G12980	Cytochrome b561 and DOMON domain-containing protein At4g12980	196.3	210.4	202	34.3	64.2	39.4	81.4	26.2	45.9	202.9	45.9667	51.1667	0.226548	0.000100236	0.252177	0.000806514
AT4G20410	Gamma-soluble NSF attachment protein	223.4	217.5	184	38.8	55	45.3	45.7	43.9	46.4	208.3	46.3667	45.3333	0.222596	0.000249144	0.217635	0.00018701
AT1G76020	Thioredoxin superfamily protein;(source:Araport11)	269.5	206.7	264	0.01	159.7	0.01	0.01	0.01	0.01	246.733	53.24	0.01	0.21578	0.0272496	4.05296e-05	0.000251992
AT4G09350	NAD(P)H-quinone oxidoreductase subunit T, Chloroplastic	217.7	306.4	223.8	0.01	152.1	0.01	0.01	0.01	0.01	249.3	50.7067	0.01	0.203396	0.0269853	4.01123e-05	0.000954696
AT4G04330	Chaperonin-like RBCX protein 1, Chloroplastic	233.4	217.3	221.3	0.01	0.01	136.1	0.01	91.9	0.01	224	45.3733	30.64	0.20256	0.0173137	0.136786	0.00337028
AT3G12610	DRT100	213.9	213.3	169.1	0.01	119.9	0.01	0.01	68.5	115.3	198.767	39.9733	61.27	0.201107	0.0203834	0.308251	0.0198601
AT1G64970	Tocopherol O-methyltransferase, Chloroplastic	229.4	245.2	181	0.01	112	0.01	0.01	0.01	132.5	218.533	37.34	44.1733	0.170866	0.0125357	0.202135	0.0224106
AT2G45180	DISEASE RELATED NONSPECIﬁC LIPID TRANSFER PROTEIN 1, DRN1	249.6	187.2	241.3	35.1	31.5	32.9	38.8	40.5	43.2	226.033	33.1667	40.8333	0.146734	0.00059722	0.180652	0.00070042
AT4G23600	Cystine lyase CORI3	221.9	230.9	246.4	27.4	36.7	36.2	34.1	36.5	29.9	233.067	33.4333	33.5	0.14345	1.36053e-05	0.143736	1.13029e-05
AT2G36870	Probable xyloglucan endotransglucosylase/hydrolase protein 32	206.5	190	208.8	0.01	34.4	50.4	24.5	99.3	86.2	201.767	28.27	70	0.140112	0.000410566	0.346935	0.0052106
AT1G35220	FAM91 carboxy-terminus protein;(source:Araport11)	228.5	221.9	272.1	28.9	30.6	28.6	34.2	26.1	29.1	240.833	29.3667	29.8	0.121938	0.0001785	0.123737	0.000187416
AT2G42530	Protein COLD-REGULATED 15B, Chloroplastic	251.3	239.5	222.9	26.4	26.7	26.3	35.8	34.2	36.8	237.9	26.4667	35.6	0.111251	1.369e-05	0.149643	1.6588e-05
AT1G66520	Formyl transferase, Putative	260.9	222.7	258.1	81.8	0.01	0.01	0.01	76.6	0.01	247.233	27.2733	25.54	0.110314	0.00182029	0.103303	0.00144076
AT5G59250	D-xylose-proton symporter-like 3, Chloroplastic	220.1	192.8	169.9	0.01	0.01	63.3	55.4	47.2	151.4	194.267	21.1067	84.6667	0.108648	0.00249378	0.435827	0.0397116
AT1G03310	ISA2	262.1	281.6	273.1	0.01	0.01	83.1	0.01	0.01	0.01	272.267	27.7067	0.01	0.101763	0.000981628	3.67287e-05	1.10539e-06
AT2G42540	Protein COLD-REGULATED 15A, Chloroplastic	265.2	259.7	232.5	19.1	21.9	20	26.3	27.8	27.5	252.467	20.3333	27.2	0.0805387	2.15905e-05	0.107737	2.4106e-05
AT1G27030	Hypothetical protein;(source:Araport11)	221	290.5	267.6	0.01	0.01	0.01	120.9	0.01	0.01	259.7	0.01	40.3067	3.8506e-05	0.00022141	0.155205	0.00830847
AT2G38750	Annexin D4	276.3	329.2	294.5	0.01	0.01	0.01	0.01	0.01	0.01	300	0.01	0.01	3.33333e-05	4.21889e-05	3.33333e-05	4.21889e-05
AT5G05860	Glycosyltransferase (Fragment)	338.7	280.1	281.2	0.01	0.01	0.01	0.01	0.01	0.01	300	0.01	0.01	3.33333e-05	0.000101095	3.33333e-05	0.000101095
AT5G06770	Zinc finger CCCH domain-containing protein 52	176.9	299.4	423.7	0.01	0.01	0.01	0.01	0.01	0.01	300	0.01	0.01	3.33333e-05	0.0135792	3.33333e-05	0.0135792
AT5G17790	Zinc finger protein VAR3, Chloroplastic	242.1	353.8	304.1	0.01	0.01	0.01	0.01	0.01	0.01	300	0.01	0.01	3.33333e-05	0.000748543	3.33333e-05	0.000748543
AT1G20190	Expansin-A11	256.9	311	332.2	0.01	0.01	0.01	0.01	0.01	0.01	300.033	0.01	0.01	3.33296e-05	0.000180276	3.33296e-05	0.000180276
AT1G43710	Serine decarboxylase	372.5	221	306.6	0.01	0.01	0.01	0.01	0.01	0.01	300.033	0.01	0.01	3.33296e-05	0.00238909	3.33296e-05	0.00238909

## Sheet: Table S2
SI Appendix Table S2 Comparison of differentially expressed proteins and N-hydroxy pipeoclic acid (NHP)-responsive genes.
ID	Annotation	Gene category
AT5G64120	Peroxidase	NHP+
AT3G20250	Pumilio 5	NHP+
AT4G29520	Nucleophosmin	NHP+
AT3G51330	Eukaryotic aspartyl protease family protein	NHP+
AT5G45500	RNI-like superfamily protein	NHP+
AT3G16460	Jacalin-related lectin 34	NHP+
AT5G62630	HIPL2 protein	NHP+
AT5G25440	Protein kinase superfamily protein	NHP+
AT2G15390	Probable fucosyltransferase 4	NHP+
AT5G54860	Probable folate-biopterin transporter 4	NHP+
AT2G25520	Probable sugar phosphate/phosphate translocator At2g25520	NHP+
AT2G03120	Homologous to Signal Peptide Peptidases	NHP+
AT5G40780	Lysine histidine transporter 1	NHP+
AT3G25010	Receptor like protein 41	NHP+
AT4G13920	Receptor-like protein 50	NHP+
AT1G34750	Probable protein phosphatase 2C 10	NHP+
AT5G42830	HXXXD-type acyl-transferase family protein	NHP+
AT4G28570	Long-chain-alcohol oxidase FAO4B	NHP+
AT2G41410	Probable calcium-binding protein CML35	NHP+
AT3G26170	Putative cytochrome P450	NHP+
AT1G26380	Berberine bridge enzyme-like 3	NHP+
AT5G22380	NAC-domain protein 90	NHP+
AT4G25000	Alpha-amylase 1	NHP+
AT1G55910	Zinc transporter 11	NHP+
AT3G51980	ARM repeat superfamily protein	NHP+
AT2G17760	Aspartyl protease family protein 1	NHP+
AT5G61210	SNP33	NHP+
AT4G36090	ALKBH9C, ATALKBH9C	NHP+
AT2G39420	Alpha/beta-Hydrolases superfamily protein	NHP+
AT1G02360	Chitinase family protein	NHP+
AT4G10960	UDP-glucose 4-epimerase 5	NHP+
AT5G45380	DUR3	NHP+
AT1G65790	Receptor-like serine/threonine-protein kinase SD1-7	NHP+
AT1G65040	ERAD-associated E3 ubiquitin-protein ligase HRD1B	NHP+
AT1G14870	PCR2	NHP+
AT2G26400	Acireductone dioxygenase 3	NHP+
AT1G04280	P-loop containing nucleoside triphosphate hydrolases superfamily protein	NHP+
AT5G11920	Beta-fructofuranosidase, Insoluble isoenzyme CWINV6	NHP+
AT4G18253	Receptor Serine/Threonine kinase-like protein	NHP+
AT1G09932	Phosphoglycerate mutase family protein	NHP+
AT3G13080	MRP3	NHP+
AT5G43910	PfkB-like carbohydrate kinase family protein	NHP+
AT5G18470	Curculin-like (Mannose-binding) lectin family protein	NHP+
AT1G67550	Urease	NHP+
AT4G10500	Protein DMR6-LIKE OXYGENASE 1	NHP+
AT5G24530	Protein DOWNY MILDEW RESISTANCE 6	NHP+
AT1G30900	Vacuolar-sorting receptor 6	NHP+
AT3G09940	Monodehydroascorbate reductase 3	NHP+
AT5G26340	STP13	NHP+
AT5G38900	Thioredoxin superfamily protein	NHP+
AT5G45490	Probable disease resistance protein At5g45490	NHP+
AT3G28540	AAA-ATPase At3g28540	NHP+
AT5G44390	Berberine bridge enzyme-like 25	NHP+
AT2G43570	CHI	NHP+
AT4G21810	Derlin-2.1	NHP+
AT2G14610	Pathogenesis-related protein 1	NHP+
AT1G13750	ARABIDOPSIS THALIANA PURPLE ACID PHOSPHATASE 1	NHP+
AT3G48090	Protein EDS1	NHP+
AT1G13470	Protein of unknown function (DUF1262)	NHP+
AT3G20410	Calcium-dependent protein kinase 9	NHP+
AT4G04570	Cysteine-rich receptor-like protein kinase 40	NHP+
AT4G20110	VACUOLAR SORTING RECEPTOR 7	NHP+
AT1G09070	Protein SRC2 homolog	NHP+
AT4G13510	Ammonium transporter	NHP+
AT5G39050	Phenolic glucoside malonyltransferase 1	NHP+
AT3G57260	Beta-1,3-glucanase 2	NHP+
AT2G18660	EG45-like domain containing protein 2	NHP+
AT1G75040	Pathogenesis-related protein 5	NHP+
AT2G33580	Protein LYK5	NHP+
AT2G26560	Patatin-like protein 2	NHP+
AT4G23140	Receptor-like protein kinase	NHP+
AT4G24190	Endoplasmin homolog	NHP+
AT1G11310	MLO-like protein 2	NHP+
AT1G08050	T6D22.13	NHP+
AT5G46230	ABA responsive SVB family gene.	NHP+
AT2G30140	UDP-glycosyltransferase 87A2	NHP+
AT5G57580	Calmodulin-binding protein 60 B	NHP+
AT2G32680	Receptor like protein 23	NHP+
AT2G33630	NAD(P)-binding Rossmann-fold superfamily protein	NHP+
AT1G69720	Heme oxygenase 3, Chloroplastic	NHP+
AT5G03160	DnaJ protein P58IPK homolog	NHP+
AT1G14880	Protein PLANT CADMIUM RESISTANCE 1	NHP+
AT1G65540	LETM1-like protein	NHP+
AT3G52430	Lipase-like PAD4	NHP+
AT1G74210	GDPD5	NHP+
AT1G08450	Calreticulin-3	NHP+
AT3G26830	Bifunctional dihydrocamalexate synthase/camalexin synthase	NHP+
AT1G45145	Thioredoxin H5	NHP+
AT4G12290	Amine oxidase	NHP+
AT2G43620	Endochitinase At2g43620	NHP+
AT3G52400	Syntaxin-122	NHP+
AT1G22400	UDP-glycosyltransferase 85A1	NHP+
AT4G08850	MDIS1-interacting receptor like kinase 2	NHP+
AT4G38550	Arabidopsis phospholipase-like protein (PEARLI 4) family	NHP+
AT1G28110	Serine carboxypeptidase-like 45	NHP+
AT5G52540	Keratin-associated protein, Putative (DUF819)	NHP+
AT5G52810	Protein SAR DEFICIENT 4	NHP+
AT2G38290	Ammonium transporter 2	NHP+
AT3G04720	Hevein-like preproprotein	NHP+
AT3G45860	Cysteine-rich receptor-like protein kinase	NHP+
AT4G18950	BLUE LIGHT-DEPENDENT H+-ATPASE	NHP+
AT3G22600	Glycosylphosphatidylinositol (GPI)-anchored LTPg protein	NHP+
AT2G38860	DJ-1 protein homolog E	NHP+
AT1G33960	P-loop containing nucleoside triphosphate hydrolases superfamily protein	NHP+
AT1G15790	Mediator of RNA polymerase II transcription subunit 15a-like protein	NHP+
AT5G39950	Thioredoxin H2	NHP+
AT2G18690	Expressed protein	NHP+
AT5G25040	Major facilitator superfamily protein	NHP+
AT5G03350	Lectin-like protein	NHP+
AT1G02920	Glutathione S-transferase F7	NHP+
AT3G19930	STP4	NHP+
AT1G02930	Glutathione S-transferase F6	NHP+
AT1G21380	TOM1-like protein 3	NHP+
AT3G01290	HIR2	NHP+
AT2G47130	Short-chain dehydrogenase reductase 3a	NHP+
AT4G00290	Mechanosensitive ion channel protein 1, Mitochondrial	NHP+
AT3G19010	2-oxoglutarate (2OG) and Fe(II)-dependent oxygenase superfamily protein	NHP+
AT1G09210	Calreticulin-2	NHP+
AT2G23810	TET8	NHP+
AT1G78920	Pyrophosphate-energized membrane proton pump 2	NHP+
AT2G17790	Vacuolar protein sorting-associated protein 35A	NHP+
AT4G21450	PapD-like superfamily protein	NHP+
AT3G22060	Cysteine-rich repeat secretory protein 38	NHP+
AT2G41490	GPT	NHP+
AT1G56340	Calreticulin-1	NHP+
AT5G06320	NHL3	NHP+
AT5G55450	Bifunctional inhibitor/lipid-transfer protein/seed storage 2S albumin superfamily protein	NHP+
AT1G27770	Chloroplast envelope Ca2+-ATPase	NHP+
AT2G26440	Probable pectinesterase/pectinesterase inhibitor 12	NHP+
AT2G04450	Nudix hydrolase 6	NHP+
AT1G18210	Probable calcium-binding protein CML27	NHP+
AT1G09080	Probable mediator of RNA polymerase II transcription subunit 37b	NHP+
AT4G27740	Protein yippee-like	NHP+
AT3G13790	Beta-fructofuranosidase, Insoluble isoenzyme CWINV1	NHP+
AT5G07340	Calreticulin family protein	NHP+
AT5G45510	Probable disease resistance protein At5g45510	NHP+
AT4G01700	Chitinase family protein;(source:Araport11)	NHP+
AT2G44290	Protein YLS3	NHP+
AT1G66880	Protein kinase superfamily protein	NHP+
AT5G61790	Calnexin 1	NHP+
AT5G53370	Pectin methylesterase PCR fragment F	NHP+
AT3G59020	Importin beta-like SAD2 homolog	NHP+
AT1G31550	GDSL esterase/lipase At1g31550	NHP+
AT2G17720	Prolyl 4-hydroxylase 5	NHP+
AT4G05020	NAD(P)H dehydrogenase B2	NHP+
AT3G51450	Protein STRICTOSIDINE SYNTHASE-LIKE 7	NHP+
AT5G24810	ABC1 family protein	NHP+
AT1G71100	Probable ribose-5-phosphate isomerase 1	NHP+
AT3G57240	Probable glucan endo-1,3-beta-glucosidase BG3	NHP+
AT1G21250	Wall-associated receptor kinase 1	NHP+
AT3G51430	Protein STRICTOSIDINE SYNTHASE-LIKE 5	NHP+
AT5G64000	SAL2 phosphatase	NHP+
AT4G35310	CPK5	NHP+
AT5G25265	Hydroxyproline O-arabinosyltransferase 1	NHP+
AT3G47380	Pectinesterase inhibitor 11	NHP+
AT4G23220	Cysteine-rich receptor-like protein kinase 14	NHP+
AT1G04980	Protein disulfide-isomerase like 2-2	NHP+
AT2G31880	Leucine-rich repeat receptor-like serine/threonine/tyrosine-protein kinase SOBIR1	NHP+
AT3G13560	Glucan endo-1,3-beta-glucosidase 4	NHP+
AT3G11010	Receptor-like protein 34	NHP+
AT4G22305	SUPPRESSOR OF AVRBST-ELICITED RESISTANCE 1	NHP+
AT5G16880	TOM1-like protein 1	NHP+
AT2G01540	Protein C2-DOMAIN ABA-RELATED 10	NHP+
AT3G49120	Peroxidase 34	NHP+
AT4G21180	DnaJ protein ERDJ2B	NHP+
AT1G35580	Alkaline/neutral invertase CINV1	NHP+
AT3G42790	AL3	NHP+
AT5G49570	Transglutaminase	NHP+
AT1G51660	MKK4	NHP+
AT4G23150	Cysteine-rich receptor-like protein kinase.	NHP+
AT1G71880	Sucrose transport protein SUC1	NHP+
AT3G50930	Protein HYPER-SENSITIVITY-RELATED 4	NHP+
AT5G37600	Glutamine synthetase cytosolic isozyme 1-1	NHP+
AT3G07690	6-phosphogluconate dehydrogenase family protein	NHP+
AT5G48380	Probably inactive leucine-rich repeat receptor-like protein kinase At5g48380	NHP+
AT1G33610	Leucine-rich repeat (LRR) family protein	NHP+
AT1G55210	Dirigent protein 20	NHP+
AT3G54960	PDIL1-3	NHP+
AT1G21270	Wall-associated receptor kinase 2	NHP+
AT1G21240	Wall-associated receptor kinase 3	NHP+
AT3G14840	Probable leucine-rich repeat receptor-like serine/threonine-protein kinase At3g14840	NHP+
AT1G77510	Protein disulfide isomerase-like 1-2	NHP+
AT3G26210	Cytochrome P450 71B23	NHP+
AT1G11330	G-type lectin S-receptor-like serine/threonine-protein kinase At1g11330	NHP+
AT3G45640	MPK3	NHP+
AT1G31130	F28K20.6 protein	NHP+
AT4G08770	Peroxidase 37	NHP+
AT3G07570	Cytochrome b561 and DOMON domain-containing protein At3g07570	NHP+
AT4G23190	Cysteine-rich receptor-like protein kinase 11	NHP+
AT3G62600	DnaJ protein ERDJ3B	NHP+
AT2G41100	Calmodulin-like protein 12	NHP+
AT4G29900	Calcium-transporting ATPase 10, Plasma membrane-type	NHP+
AT4G23170	Putative cysteine-rich receptor-like protein kinase 9	NHP+
AT5G48540	Cysteine-rich repeat secretory protein 55	NHP+
AT2G22500	Mitochondrial uncoupling protein 5	NHP+
AT4G11850	Phospholipase D gamma 1	NHP+
AT4G34150	Calcium-dependent lipid-binding (CaLB domain) family protein	NHP+
AT3G24090	GFAT	NHP+
AT1G21750	Protein disulfide isomerase-like 1-1	NHP+
AT5G51830	Probable fructokinase-7	NHP+
AT4G19880	Glutathione S-transferase family protein	NHP+
AT3G55260	Beta-hexosaminidase	NHP+
AT1G69730	Wall-associated receptor kinase-like 9	NHP+
AT3G12740	ALA-interacting subunit 1	NHP+
AT4G02520	Glutathione S-transferase F2	NHP+
AT1G79380	E3 ubiquitin-protein ligase RGLG4	NHP+
AT2G40600	Appr-1-p processing enzyme family protein	NHP+
AT1G52780	Protein of unknown function (DUF2921)	NHP+
AT3G09840	CDC48A	NHP+
AT3G07720	Galactose oxidase/kelch repeat superfamily protein;(source:Araport11)	NHP+
AT2G01650	Plant UBX domain-containing protein 2	NHP+
AT4G37640	CALCIUM ATPASE 2	NHP+
AT4G23650	CPK3	NHP+
AT2G43850	Integrin-linked protein kinase 1	NHP+
AT2G45070	Protein transport protein Sec61 subunit beta	NHP+
AT1G02880	Thiamine pyrophosphokinase	NHP+
AT3G28450	Inactive LRR receptor-like serine/threonine-protein kinase BIR2	NHP+
AT5G12890	Glycosyltransferase (Fragment)	NHP+
AT3G13330	PA200	NHP+
AT3G29250	Short-chain dehydrogenase reductase 4	NHP+
AT1G64710	Alcohol dehydrogenase-like 4	NHP+
AT1G59710	Actin cross-linking protein (DUF569)	NHP+
AT5G10760	Aspartyl protease AED1	NHP+
AT4G33360	NAD(P)-binding Rossmann-fold superfamily protein	NHP+
AT5G19750	Peroxisomal membrane 22 kDa (Mpv17/PMP22) family protein	NHP+
AT1G61250	Secretory carrier-associated membrane protein 3	NHP+
AT3G25780	Allene oxide cyclase 3, Chloroplastic	NHP+
AT4G01610	Cathepsin B-like protease 3	NHP+
AT1G69840	Hypersensitive-induced response protein 2	NHP+
AT5G18480	Inositol phosphorylceramide glucuronosyltransferase 1	NHP+
AT5G14930	Senescence-associated carboxylesterase 101	NHP+
AT1G16670	Cold-responsive protein kinase 1	NHP+
AT1G55450	S-adenosyl-L-methionine-dependent methyltransferases superfamily protein	NHP+
AT4G36210	Protein of unknown function (DUF726)	NHP+
AT2G17840	Protein EARLY-RESPONSIVE TO DEHYDRATION 7, Chloroplastic	NHP+
AT3G11820	SYR1	NHP+
AT5G16370	Probable acyl-activating enzyme 5, Peroxisomal	NHP+
AT5G47070	Probable serine/threonine-protein kinase PBL19	NHP+
AT5G04920	Vacuolar protein sorting-associated protein 36	NHP+
AT1G09560	Germin-like protein subfamily 2 member 1	NHP+
AT3G54150	Embryonic abundant protein-like	NHP+
AT4G34480	Glucan endo-1,3-beta-glucosidase 7	NHP+
AT5G53330	Proline-rich cell wall protein-like	NHP+
AT1G76040	Calcium-dependent protein kinase 29	NHP+
AT4G22670	FAM10 family protein At4g22670	NHP+
AT4G12720	MutT/nudix family protein	NHP+
AT5G64370	Beta-ureidopropionase	NHP+
AT4G26070	NMAPKK	NHP+
AT2G25110	Stromal cell-derived factor 2-like protein	NHP+
AT3G51660	LS1-like protein	NHP+
AT4G11840	Phospholipase D gamma 3	NHP+
AT1G71040	Multicopper oxidase LPR2	NHP+
AT5G56030	Heat shock protein 81-2	NHP+
AT4G23180	Cysteine-rich receptor-like protein kinase 10	NHP+
AT2G41090	Calmodulin-like protein 10	NHP+
AT4G00970	Cysteine-rich receptor-like protein kinase 41	NHP+
AT2G37710	L-type lectin-domain containing receptor kinase IV.1	NHP+
AT1G01560	Mitogen-activated protein kinase 11	NHP+
AT1G63460	Probable glutathione peroxidase 8	NHP+
AT1G54320	ALA-interacting subunit 3	NHP+
AT5G19240	Uncharacterized GPI-anchored protein At5g19240	NHP+
AT4G14400	Protein ACCELERATED CELL DEATH 6	NHP+
AT3G60415	Phosphoglycerate mutase family protein;(source:Araport11)	NHP+
AT4G23570	Phosphatase-related	NHP+
AT1G30000	Alpha-mannosidase 3	NHP+
AT5G28540	Mediator of RNA polymerase II transcription subunit 37a	NHP+
AT1G03400	2-oxoglutarate (2OG) and Fe(II)-dependent oxygenase superfamily protein	NHP+
AT5G42020	Heat shock protein 70 (Hsp 70) family protein	NHP+
AT3G04480	Endoribonuclease	NHP+
AT4G23460	Beta-adaptin-like protein C	NHP+
AT2G02390	Glutathione S-transferase zeta 1	NHP+
AT2G37540	NAD(P)-binding Rossmann-fold superfamily protein	NHP+
AT2G47730	Glutathione S-transferase F8, Chloroplastic	NHP+
AT3G29075	Glycine-rich protein	NHP+
AT2G03510	Expressed protein	NHP+
AT5G54500	Flavodoxin-like quinone reductase 1	NHP+
AT1G71220	UDP-glucose:glycoprotein glucosyltransferases;transferases, Transferring hexosyl groups;transferases, Transferring glycosyl groups	NHP+
AT3G16530	Lectin-like protein At3g16530	NHP+
AT5G55130	Adenylyltransferase and sulfurtransferase MOCS3	NHP+
AT2G04690	Pyridoxamine 5'-phosphate oxidase family protein	NHP+
AT4G25900	Glucose-6-phosphate 1-epimerase	NHP+
AT2G29350	SAG13	NHP+
AT4G29810	MAP kinase kinase 2	NHP+
AT3G50950	Disease resistance RPP13-like protein 4	NHP+
AT2G37970	SOUL heme-binding family protein	NHP+
AT4G17830	Peptidase M20/M25/M40 family protein	NHP+
AT5G52640	Heat shock protein 90-1	NHP+
AT1G72930	Toll/interleukin-1 receptor-like protein	NHP+
AT3G25070	RPM1 interacting protein 4	NHP+
AT2G17120	LysM domain-containing GPI-anchored protein 2	NHP+
AT1G20510	4-coumarate--CoA ligase-like 5	NHP+
AT5G44070	Phytochelatin synthase gene	NHP+
AT2G17130	Isocitrate dehydrogenase	NHP+
AT3G46510	U-box domain-containing protein 13	NHP+
AT4G36945	PLC-like phosphodiesterases superfamily protein	NHP+
AT5G38990	Probable receptor-like protein kinase At5g38990	NHP+
AT4G01370	Mitogen-activated protein kinase 4	NHP+
AT1G72680	Cinnamyl-alcohol dehydrogenase;(source:Araport11)	NHP+
AT5G18170	Glutamate dehydrogenase	NHP+
AT4G08230	Glycine-rich protein	NHP+
AT3G09810	Isocitrate dehydrogenase	NHP+
AT1G18260	ERAD-associated E3 ubiquitin-protein ligase component HRD3A	NHP+
AT2G15860	BAT2 domain protein	NHP+
AT4G20830	Berberine bridge enzyme-like 19	NHP+
AT1G80460	Glycerol kinase	NHP+
AT1G22510	E3 ubiquitin-protein ligase RNF170-like protein (DUF 1232)	NHP+
AT1G48210	Protein kinase superfamily protein	NHP+
AT3G51000	Alpha/beta-Hydrolases superfamily protein;(source:Araport11)	NHP+
AT5G25250	Flotillin-like protein 1	NHP+
AT3G15356	Lectin-like protein LEC	NHP+
AT5G49760	Leucine rich receptor kinase. Encodes a receptor of extracellular reactive oxygen species.	NHP+
AT4G00570	NAD-dependent malic enzyme 2, Mitochondrial	NHP+
AT4G11260	SGT1B	NHP+
AT5G03630	Monodehydroascorbate reductase 2	NHP+
AT5G08380	Alpha-galactosidase 1	NHP+
AT2G47470	UNE5	NHP+
AT5G35080	OS9	NHP+
AT1G72330	Alanine aminotransferase 2	NHP+
AT3G63080	Probable glutathione peroxidase 5	NHP+
AT4G01870	TolB protein-related	NHP+
AT4G35230	Serine/threonine-protein kinase BSK1	NHP+
AT3G45310	Thiol protease aleurain-like	NHP+
AT3G56310	Alpha-galactosidase 3	NHP+
AT3G60440	Phosphoglycerate mutase family protein	NHP+
AT1G59870	ABC transporter G family member 36	NHP+
AT1G27330	Ribosome associated membrane protein RAMP4;(source:Araport11)	NHP+
AT4G26910	Dihydrolipoyllysine-residue succinyltransferase component of 2-oxoglutarate dehydrogenase complex 2, Mitochondrial	NHP+
AT4G31180	Aspartate--tRNA ligase 2, Cytoplasmic	NHP+
AT3G15980	Coatomer subunit beta'	NHP+
AT5G62720	Integral membrane HPP family protein. Putative nitrate transporter.	NHP-
AT1G31070	GlcNAc1pUT1	NHP-
AT3G23820	UDP-glucuronate 4-epimerase 6	NHP-
AT3G61430	PIP1A	NHP-
AT1G62180	5'-adenylylsulfate reductase 2, Chloroplastic	NHP-
AT3G51240	Naringenin,2-oxoglutarate 3-dioxygenase	NHP-
AT1G01620	TMP-B	NHP-
AT1G75680	Endoglucanase 10	NHP-
AT2G37170	Plasma membrane intrinsic protein 2	NHP-
AT2G35860	FLA16	NHP-
AT3G53420	PIP2A	NHP-
AT2G22240	Inositol-3-phosphate synthase isozyme 2	NHP-
AT1G07440	Tropinone reductase homolog At1g07440	NHP-
AT3G10940	Phosphoglucan phosphatase LSF2, Chloroplastic	NHP-
AT1G78020	FCS-Like Zinc finger 6	NHP-
AT4G12980	Cytochrome b561 and DOMON domain-containing protein At4g12980	NHP-
AT1G76020	Thioredoxin superfamily protein;(source:Araport11)	NHP-
AT3G12610	DRT100	NHP-
AT2G36870	Probable xyloglucan endotransglucosylase/hydrolase protein 32	NHP-
AT2G42530	Protein COLD-REGULATED 15B, Chloroplastic	NHP-
AT2G42540	Protein COLD-REGULATED 15A, Chloroplastic	NHP-
AT1G27030	Hypothetical protein;(source:Araport11)	NHP-
AT5G05860	Glycosyltransferase (Fragment)	NHP-
NHP+: NHP-induced genes
NHP-: NHP-repressed genes

## Sheet: Table S3
SI Appendix Table S3 Comparison of differentially expressed proteins and systemic acquired resistance (SAR)-responsive genes.
ID	Annotation	Gene category
AT1G01620	TMP-B	SAR-
AT1G03310	ISA2	SAR-
AT1G07440	Tropinone reductase homolog At1g07440	SAR-
AT1G20190	Expansin-A11	SAR-
AT1G22530	Patellin-2	SAR-
AT1G30690	Patellin-4	SAR-
AT1G31070	GlcNAc1pUT1	SAR-
AT1G32900	Granule-bound starch synthase 1, Chloroplastic/amyloplastic	SAR-
AT1G44920	T12C22.21 protein	SAR-
AT1G49660	Probable carboxylesterase 5	SAR-
AT1G62180	5'-adenylylsulfate reductase 2, Chloroplastic	SAR-
AT1G69295	PLASMODESMATA CALLOSE-BINDING PROTEIN 4	SAR-
AT1G72150	Patellin-1	SAR-
AT1G75680	Endoglucanase 10	SAR-
AT1G76020	Thioredoxin superfamily protein;(source:Araport11)	SAR-
AT1G78020	FCS-Like Zinc finger 6	SAR-
AT2G03980	GDSL esterase/lipase At2g03980	SAR-
AT2G04030	HSP90.5	SAR-
AT2G20190	CLIP-associated protein	SAR-
AT2G22240	Inositol-3-phosphate synthase isozyme 2	SAR-
AT2G25830	Probable transcriptional regulatory protein At2g25830	SAR-
AT2G28450	Zinc finger CCCH domain-containing protein 24	SAR-
AT2G32500	Stress responsive alpha-beta barrel domain protein;(source:Araport11)	SAR-
AT2G35860	FLA16	SAR-
AT2G36870	Probable xyloglucan endotransglucosylase/hydrolase protein 32	SAR-
AT2G37170	Plasma membrane intrinsic protein 2	SAR-
AT2G38750	Annexin D4	SAR-
AT2G42530	Protein COLD-REGULATED 15B, Chloroplastic	SAR-
AT2G42540	Protein COLD-REGULATED 15A, Chloroplastic	SAR-
AT2G45180	DISEASE RELATED NONSPECIﬁC LIPID TRANSFER PROTEIN 1, DRN1	SAR-
AT2G45960	Plasma membrane intrinsic protein 1B	SAR-
AT3G10720	Probable pectinesterase/pectinesterase inhibitor 25	SAR-
AT3G10940	Phosphoglucan phosphatase LSF2, Chloroplastic	SAR-
AT3G12610	DRT100	SAR-
AT3G16000	MAR-binding filament-like protein 1	SAR-
AT3G23820	UDP-glucuronate 4-epimerase 6	SAR-
AT3G45970	Expansin-like A1	SAR-
AT3G49140	Pentatricopeptide repeat (PPR) superfamily protein	SAR-
AT3G50270	Anthranilate N-hydroxycinnamoyl/benzoyltransferase-like protein	SAR-
AT3G51240	Naringenin,2-oxoglutarate 3-dioxygenase	SAR-
AT3G53420	PIP2A	SAR-
AT3G57780	Nucleolar-like protein	SAR-
AT3G61430	PIP1A	SAR-
AT4G09350	NAD(P)H-quinone oxidoreductase subunit T, Chloroplastic	SAR-
AT4G12980	Cytochrome b561 and DOMON domain-containing protein At4g12980	SAR-
AT4G18440	Adenylosuccinate lyase	SAR-
AT4G21990	5'-adenylylsulfate reductase 3, Chloroplastic	SAR-
AT4G23670	Polyketide cyclase	SAR-
AT4G33580	Beta carbonic anhydrase 5	SAR-
AT4G37800	Probable xyloglucan endotransglucosylase/hydrolase protein 7	SAR-
AT5G01590	Protein TIC 56, Chloroplastic	SAR-
AT5G04440	Galactose-binding-like domain protein	SAR-
AT5G06770	Zinc finger CCCH domain-containing protein 52	SAR-
AT5G13050	5-formyltetrahydrofolate cyclo-ligase, Mitochondrial	SAR-
AT5G15970	KIN2	SAR-
AT5G17790	Zinc finger protein VAR3, Chloroplastic	SAR-
AT5G18100	Superoxide dismutase	SAR-
AT5G19620	Outer envelope protein 80, Chloroplastic	SAR-
AT5G27560	DUF1995 domain protein, Putative (DUF1995)	SAR-
AT5G42650	Allene oxide synthase, Chloroplastic	SAR-
AT5G44410	Berberine bridge enzyme-like 27	SAR-
AT5G44520	NagB/RpiA/CoA transferase-like superfamily protein	SAR-
AT5G44650	Ycf3-interacting protein 1, Chloroplastic	SAR-
AT5G48790	LOW PSII ACCUMULATION protein (DUF1995);(source:Araport11)	SAR-
AT5G55230	Microtubule-associated proteins 65-1	SAR-
AT5G59250	D-xylose-proton symporter-like 3, Chloroplastic	SAR-
AT5G60540	PDX2	SAR-
AT5G61130	PLASMODESMATA CALLOSE-BINDING PROTEIN 1	SAR-
AT5G65730	Xyloglucan endotransglucosylase/hydrolase	SAR-
AT5G65840	Thioredoxin superfamily protein	SAR-
AT1G01560	Mitogen-activated protein kinase 11	SAR+
AT1G02170	MCP1b	SAR+
AT1G02360	Chitinase family protein	SAR+
AT1G02880	Thiamine pyrophosphokinase	SAR+
AT1G02920	Glutathione S-transferase F7	SAR+
AT1G02930	Glutathione S-transferase F6	SAR+
AT1G03400	2-oxoglutarate (2OG) and Fe(II)-dependent oxygenase superfamily protein	SAR+
AT1G04280	P-loop containing nucleoside triphosphate hydrolases superfamily protein	SAR+
AT1G04980	Protein disulfide-isomerase like 2-2	SAR+
AT1G05010	1-aminocyclopropane-1-carboxylate oxidase 4	SAR+
AT1G06130	GLX2-4	SAR+
AT1G06290	Acyl-coenzyme A oxidase 3, Peroxisomal	SAR+
AT1G08050	T6D22.13	SAR+
AT1G08450	Calreticulin-3	SAR+
AT1G09070	Protein SRC2 homolog	SAR+
AT1G09080	Probable mediator of RNA polymerase II transcription subunit 37b	SAR+
AT1G09210	Calreticulin-2	SAR+
AT1G09560	Germin-like protein subfamily 2 member 1	SAR+
AT1G09932	Phosphoglycerate mutase family protein	SAR+
AT1G10130	Calcium-transporting ATPase 3, Endoplasmic reticulum-type	SAR+
AT1G11310	MLO-like protein 2	SAR+
AT1G11330	G-type lectin S-receptor-like serine/threonine-protein kinase At1g11330	SAR+
AT1G12360	SNARE-interacting protein KEULE	SAR+
AT1G13470	Protein of unknown function (DUF1262)	SAR+
AT1G13750	ARABIDOPSIS THALIANA PURPLE ACID PHOSPHATASE 1	SAR+
AT1G14870	PCR2	SAR+
AT1G14880	Protein PLANT CADMIUM RESISTANCE 1	SAR+
AT1G15790	Mediator of RNA polymerase II transcription subunit 15a-like protein	SAR+
AT1G16670	Cold-responsive protein kinase 1	SAR+
AT1G16900	Dol-P-Man:Man(6)GlcNAc(2)-PP-Dol alpha-1,2-mannosyltransferase	SAR+
AT1G18210	Probable calcium-binding protein CML27	SAR+
AT1G18260	ERAD-associated E3 ubiquitin-protein ligase component HRD3A	SAR+
AT1G18630	GR-RBP6	SAR+
AT1G20510	4-coumarate--CoA ligase-like 5	SAR+
AT1G20575	Dolichol-phosphate mannosyltransferase subunit 1	SAR+
AT1G21240	Wall-associated receptor kinase 3	SAR+
AT1G21250	Wall-associated receptor kinase 1	SAR+
AT1G21270	Wall-associated receptor kinase 2	SAR+
AT1G21380	TOM1-like protein 3	SAR+
AT1G21750	Protein disulfide isomerase-like 1-1	SAR+
AT1G22400	UDP-glycosyltransferase 85A1	SAR+
AT1G22510	E3 ubiquitin-protein ligase RNF170-like protein (DUF 1232)	SAR+
AT1G23900	AP-1 complex subunit gamma-1	SAR+
AT1G26380	Berberine bridge enzyme-like 3	SAR+
AT1G27330	Ribosome associated membrane protein RAMP4;(source:Araport11)	SAR+
AT1G27770	Chloroplast envelope Ca2+-ATPase	SAR+
AT1G29350	Kinase-related protein of unknown function (DUF1296)	SAR+
AT1G30000	Alpha-mannosidase 3	SAR+
AT1G30900	Vacuolar-sorting receptor 6	SAR+
AT1G31130	F28K20.6 protein	SAR+
AT1G31550	GDSL esterase/lipase At1g31550	SAR+
AT1G33610	Leucine-rich repeat (LRR) family protein	SAR+
AT1G33960	P-loop containing nucleoside triphosphate hydrolases superfamily protein	SAR+
AT1G34750	Probable protein phosphatase 2C 10	SAR+
AT1G35580	Alkaline/neutral invertase CINV1	SAR+
AT1G45145	Thioredoxin H5	SAR+
AT1G45332	Elongation factor G-1, Mitochondrial	SAR+
AT1G47550	Exocyst complex component sec3A	SAR+
AT1G48210	Protein kinase superfamily protein	SAR+
AT1G48320	DHNAT1	SAR+
AT1G51660	MKK4	SAR+
AT1G52780	Protein of unknown function (DUF2921)	SAR+
AT1G54090	Exocyst subunit Exo70 family protein	SAR+
AT1G54320	ALA-interacting subunit 3	SAR+
AT1G55210	Dirigent protein 20	SAR+
AT1G55450	S-adenosyl-L-methionine-dependent methyltransferases superfamily protein	SAR+
AT1G55910	Zinc transporter 11	SAR+
AT1G56340	Calreticulin-1	SAR+
AT1G59710	Actin cross-linking protein (DUF569)	SAR+
AT1G59870	ABC transporter G family member 36	SAR+
AT1G61250	Secretory carrier-associated membrane protein 3	SAR+
AT1G63460	Probable glutathione peroxidase 8	SAR+
AT1G64710	Alcohol dehydrogenase-like 4	SAR+
AT1G65040	ERAD-associated E3 ubiquitin-protein ligase HRD1B	SAR+
AT1G65540	LETM1-like protein	SAR+
AT1G65790	Receptor-like serine/threonine-protein kinase SD1-7	SAR+
AT1G66410	Calmodulin 4	SAR+
AT1G66680	Protein-lysine N-methyltransferase At1g66680	SAR+
AT1G66880	Protein kinase superfamily protein	SAR+
AT1G67550	Urease	SAR+
AT1G68300	Adenine nucleotide alpha hydrolases-like superfamily protein	SAR+
AT1G69720	Heme oxygenase 3, Chloroplastic	SAR+
AT1G69840	Hypersensitive-induced response protein 2	SAR+
AT1G71040	Multicopper oxidase LPR2	SAR+
AT1G71100	Probable ribose-5-phosphate isomerase 1	SAR+
AT1G71220	UDP-glucose:glycoprotein glucosyltransferases;transferases, Transferring hexosyl groups;transferases, Transferring glycosyl groups	SAR+
AT1G71697	Probable choline kinase 1	SAR+
AT1G71880	Sucrose transport protein SUC1	SAR+
AT1G72330	Alanine aminotransferase 2	SAR+
AT1G72680	Cinnamyl-alcohol dehydrogenase;(source:Araport11)	SAR+
AT1G72930	Toll/interleukin-1 receptor-like protein	SAR+
AT1G74210	GDPD5	SAR+
AT1G75040	Pathogenesis-related protein 5	SAR+
AT1G76040	Calcium-dependent protein kinase 29	SAR+
AT1G77510	Protein disulfide isomerase-like 1-2	SAR+
AT1G78920	Pyrophosphate-energized membrane proton pump 2	SAR+
AT1G79380	E3 ubiquitin-protein ligase RGLG4	SAR+
AT1G80460	Glycerol kinase	SAR+
AT2G01540	Protein C2-DOMAIN ABA-RELATED 10	SAR+
AT2G01650	Plant UBX domain-containing protein 2	SAR+
AT2G02390	Glutathione S-transferase zeta 1	SAR+
AT2G02930	Glutathione S-transferase F3	SAR+
AT2G03120	Homologous to Signal Peptide Peptidases	SAR+
AT2G03510	Expressed protein	SAR+
AT2G04400	Indole-3-glycerol phosphate synthase, Chloroplastic	SAR+
AT2G04450	Nudix hydrolase 6	SAR+
AT2G04550	Protein-tyrosine-phosphatase IBR5	SAR+
AT2G13560	NAD-dependent malic enzyme 1, Mitochondrial	SAR+
AT2G14610	Pathogenesis-related protein 1	SAR+
AT2G15390	Probable fucosyltransferase 4	SAR+
AT2G15860	BAT2 domain protein	SAR+
AT2G17120	LysM domain-containing GPI-anchored protein 2	SAR+
AT2G17130	Isocitrate dehydrogenase	SAR+
AT2G17720	Prolyl 4-hydroxylase 5	SAR+
AT2G17760	Aspartyl protease family protein 1	SAR+
AT2G17790	Vacuolar protein sorting-associated protein 35A	SAR+
AT2G17840	Protein EARLY-RESPONSIVE TO DEHYDRATION 7, Chloroplastic	SAR+
AT2G18660	EG45-like domain containing protein 2	SAR+
AT2G18690	Expressed protein	SAR+
AT2G21390	Coatomer subunit alpha-2	SAR+
AT2G22300	Calmodulin-binding transcription activator 3	SAR+
AT2G22500	Mitochondrial uncoupling protein 5	SAR+
AT2G23810	TET8	SAR+
AT2G24180	Cytochrome P450 71B6	SAR+
AT2G25110	Stromal cell-derived factor 2-like protein	SAR+
AT2G25520	Probable sugar phosphate/phosphate translocator At2g25520	SAR+
AT2G26400	Acireductone dioxygenase 3	SAR+
AT2G26440	Probable pectinesterase/pectinesterase inhibitor 12	SAR+
AT2G26560	Patatin-like protein 2	SAR+
AT2G29080	ATP-dependent zinc metalloprotease FTSH 3, Mitochondrial	SAR+
AT2G29350	SAG13	SAR+
AT2G30140	UDP-glycosyltransferase 87A2	SAR+
AT2G30880	SWAP70	SAR+
AT2G31390	Probable fructokinase-1	SAR+
AT2G31880	Leucine-rich repeat receptor-like serine/threonine/tyrosine-protein kinase SOBIR1	SAR+
AT2G32680	Receptor like protein 23	SAR+
AT2G33580	Protein LYK5	SAR+
AT2G33630	NAD(P)-binding Rossmann-fold superfamily protein	SAR+
AT2G34040	Apoptosis inhibitory protein 5 (API5)	SAR+
AT2G36850	Callose synthase 10	SAR+
AT2G37710	L-type lectin-domain containing receptor kinase IV.1	SAR+
AT2G37970	SOUL heme-binding family protein	SAR+
AT2G38290	Ammonium transporter 2	SAR+
AT2G38860	DJ-1 protein homolog E	SAR+
AT2G39970	Peroxisomal nicotinamide adenine dinucleotide carrier	SAR+
AT2G40600	Appr-1-p processing enzyme family protein	SAR+
AT2G41090	Calmodulin-like protein 10	SAR+
AT2G41100	Calmodulin-like protein 12	SAR+
AT2G41410	Probable calcium-binding protein CML35	SAR+
AT2G41490	GPT	SAR+
AT2G42790	Citrate synthase	SAR+
AT2G43570	CHI	SAR+
AT2G43790	Mitogen-activated protein kinase	SAR+
AT2G43850	Integrin-linked protein kinase 1	SAR+
AT2G44290	Protein YLS3	SAR+
AT2G45070	Protein transport protein Sec61 subunit beta	SAR+
AT2G45140	Vesicle-associated protein 1-2	SAR+
AT2G45220	Probable pectinesterase/pectinesterase inhibitor 17	SAR+
AT2G47130	Short-chain dehydrogenase reductase 3a	SAR+
AT2G47470	UNE5	SAR+
AT2G47730	Glutathione S-transferase F8, Chloroplastic	SAR+
AT3G01290	HIR2	SAR+
AT3G02740	Eukaryotic aspartyl protease family protein	SAR+
AT3G03060	P-loop containing nucleoside triphosphate hydrolases superfamily protein	SAR+
AT3G03470	Cytochrome P450 89A9	SAR+
AT3G04480	Endoribonuclease	SAR+
AT3G04720	Hevein-like preproprotein	SAR+
AT3G07570	Cytochrome b561 and DOMON domain-containing protein At3g07570	SAR+
AT3G07720	Galactose oxidase/kelch repeat superfamily protein;(source:Araport11)	SAR+
AT3G08530	Clathrin heavy chain 2	SAR+
AT3G09810	Isocitrate dehydrogenase	SAR+
AT3G09840	CDC48A	SAR+
AT3G09940	Monodehydroascorbate reductase 3	SAR+
AT3G10380	SEC8	SAR+
AT3G11010	Receptor-like protein 34	SAR+
AT3G11820	SYR1	SAR+
AT3G11910	UBP13	SAR+
AT3G12740	ALA-interacting subunit 1	SAR+
AT3G13080	MRP3	SAR+
AT3G13330	PA200	SAR+
AT3G13560	Glucan endo-1,3-beta-glucosidase 4	SAR+
AT3G13790	Beta-fructofuranosidase, Insoluble isoenzyme CWINV1	SAR+
AT3G13990	Dentin sialophosphoprotein, Putative (DUF1296);(source:Araport11)	SAR+
AT3G14840	Probable leucine-rich repeat receptor-like serine/threonine-protein kinase At3g14840	SAR+
AT3G15180	ARM repeat superfamily protein	SAR+
AT3G15356	Lectin-like protein LEC	SAR+
AT3G15980	Coatomer subunit beta'	SAR+
AT3G16530	Lectin-like protein At3g16530	SAR+
AT3G17810	PYD1	SAR+
AT3G19010	2-oxoglutarate (2OG) and Fe(II)-dependent oxygenase superfamily protein	SAR+
AT3G19930	STP4	SAR+
AT3G20250	Pumilio 5	SAR+
AT3G20410	Calcium-dependent protein kinase 9	SAR+
AT3G21140	Pyridoxamine 5'-phosphate oxidase family protein	SAR+
AT3G22060	Cysteine-rich repeat secretory protein 38	SAR+
AT3G22600	Glycosylphosphatidylinositol (GPI)-anchored LTPg protein	SAR+
AT3G24090	GFAT	SAR+
AT3G24350	Syntaxin of plants 32	SAR+
AT3G24503	Aldehyde dehydrogenase family 2 member C4	SAR+
AT3G25010	Receptor like protein 41	SAR+
AT3G25070	RPM1 interacting protein 4	SAR+
AT3G25780	Allene oxide cyclase 3, Chloroplastic	SAR+
AT3G26170	Putative cytochrome P450	SAR+
AT3G26210	Cytochrome P450 71B23	SAR+
AT3G26830	Bifunctional dihydrocamalexate synthase/camalexin synthase	SAR+
AT3G28450	Inactive LRR receptor-like serine/threonine-protein kinase BIR2	SAR+
AT3G28540	AAA-ATPase At3g28540	SAR+
AT3G29075	Glycine-rich protein	SAR+
AT3G42790	AL3	SAR+
AT3G43810	Calmodulin 7	SAR+
AT3G45640	MPK3	SAR+
AT3G45860	Cysteine-rich receptor-like protein kinase	SAR+
AT3G46510	U-box domain-containing protein 13	SAR+
AT3G47380	Pectinesterase inhibitor 11	SAR+
AT3G47800	Aldose 1-epimerase	SAR+
AT3G47810	Vacuolar protein sorting-associated protein 29	SAR+
AT3G48090	Protein EDS1	SAR+
AT3G49120	Peroxidase 34	SAR+
AT3G50930	Protein HYPER-SENSITIVITY-RELATED 4	SAR+
AT3G50950	Disease resistance RPP13-like protein 4	SAR+
AT3G51000	Alpha/beta-Hydrolases superfamily protein;(source:Araport11)	SAR+
AT3G51330	Eukaryotic aspartyl protease family protein	SAR+
AT3G51430	Protein STRICTOSIDINE SYNTHASE-LIKE 5	SAR+
AT3G51450	Protein STRICTOSIDINE SYNTHASE-LIKE 7	SAR+
AT3G51660	LS1-like protein	SAR+
AT3G51980	ARM repeat superfamily protein	SAR+
AT3G52400	Syntaxin-122	SAR+
AT3G52430	Lipase-like PAD4	SAR+
AT3G54150	Embryonic abundant protein-like	SAR+
AT3G54960	PDIL1-3	SAR+
AT3G55260	Beta-hexosaminidase	SAR+
AT3G56310	Alpha-galactosidase 3	SAR+
AT3G57090	Mitochondrial fission 1 protein A	SAR+
AT3G57240	Probable glucan endo-1,3-beta-glucosidase BG3	SAR+
AT3G57260	Beta-1,3-glucanase 2	SAR+
AT3G59020	Importin beta-like SAD2 homolog	SAR+
AT3G62600	DnaJ protein ERDJ3B	SAR+
AT3G63080	Probable glutathione peroxidase 5	SAR+
AT4G00290	Mechanosensitive ion channel protein 1, Mitochondrial	SAR+
AT4G00570	NAD-dependent malic enzyme 2, Mitochondrial	SAR+
AT4G00970	Cysteine-rich receptor-like protein kinase 41	SAR+
AT4G01370	Mitogen-activated protein kinase 4	SAR+
AT4G01610	Cathepsin B-like protease 3	SAR+
AT4G01700	Chitinase family protein;(source:Araport11)	SAR+
AT4G01870	TolB protein-related	SAR+
AT4G02330	Probable pectinesterase/pectinesterase inhibitor 41	SAR+
AT4G02520	Glutathione S-transferase F2	SAR+
AT4G04570	Cysteine-rich receptor-like protein kinase 40	SAR+
AT4G04720	Calcium-dependent protein kinase 21	SAR+
AT4G05000	Vacuolar protein sorting-associated protein 28 homolog	SAR+
AT4G05020	NAD(P)H dehydrogenase B2	SAR+
AT4G08230	Glycine-rich protein	SAR+
AT4G08770	Peroxidase 37	SAR+
AT4G08850	MDIS1-interacting receptor like kinase 2	SAR+
AT4G09750	NAD(P)-binding Rossmann-fold superfamily protein	SAR+
AT4G10500	Protein DMR6-LIKE OXYGENASE 1	SAR+
AT4G10960	UDP-glucose 4-epimerase 5	SAR+
AT4G11260	SGT1B	SAR+
AT4G11380	Beta-adaptin-like protein	SAR+
AT4G11840	Phospholipase D gamma 3	SAR+
AT4G11850	Phospholipase D gamma 1	SAR+
AT4G12290	Amine oxidase	SAR+
AT4G12720	MutT/nudix family protein	SAR+
AT4G13510	Ammonium transporter	SAR+
AT4G13920	Receptor-like protein 50	SAR+
AT4G14400	Protein ACCELERATED CELL DEATH 6	SAR+
AT4G15610	CASP-like protein 1D1	SAR+
AT4G16950	Disease resistance protein RPP5	SAR+
AT4G17830	Peptidase M20/M25/M40 family protein	SAR+
AT4G18950	BLUE LIGHT-DEPENDENT H+-ATPASE	SAR+
AT4G19880	Glutathione S-transferase family protein	SAR+
AT4G20110	VACUOLAR SORTING RECEPTOR 7	SAR+
AT4G20830	Berberine bridge enzyme-like 19	SAR+
AT4G21160	ZAC	SAR+
AT4G21180	DnaJ protein ERDJ2B	SAR+
AT4G21450	PapD-like superfamily protein	SAR+
AT4G21580	Zinc-binding dehydrogenase family protein	SAR+
AT4G21810	Derlin-2.1	SAR+
AT4G22305	SUPPRESSOR OF AVRBST-ELICITED RESISTANCE 1	SAR+
AT4G22670	FAM10 family protein At4g22670	SAR+
AT4G23140	Receptor-like protein kinase	SAR+
AT4G23150	Cysteine-rich receptor-like protein kinase.	SAR+
AT4G23170	Putative cysteine-rich receptor-like protein kinase 9	SAR+
AT4G23180	Cysteine-rich receptor-like protein kinase 10	SAR+
AT4G23190	Cysteine-rich receptor-like protein kinase 11	SAR+
AT4G23220	Cysteine-rich receptor-like protein kinase 14	SAR+
AT4G23460	Beta-adaptin-like protein C	SAR+
AT4G23570	Phosphatase-related	SAR+
AT4G23650	CPK3	SAR+
AT4G24190	Endoplasmin homolog	SAR+
AT4G25900	Glucose-6-phosphate 1-epimerase	SAR+
AT4G26070	NMAPKK	SAR+
AT4G26910	Dihydrolipoyllysine-residue succinyltransferase component of 2-oxoglutarate dehydrogenase complex 2, Mitochondrial	SAR+
AT4G27320	Universal stress protein PHOS34	SAR+
AT4G27500	Proton pump-interactor 1	SAR+
AT4G27740	Protein yippee-like	SAR+
AT4G28570	Long-chain-alcohol oxidase FAO4B	SAR+
AT4G29520	Nucleophosmin	SAR+
AT4G29810	MAP kinase kinase 2	SAR+
AT4G29900	Calcium-transporting ATPase 10, Plasma membrane-type	SAR+
AT4G31180	Aspartate--tRNA ligase 2, Cytoplasmic	SAR+
AT4G32180	Pantothenate kinase 2	SAR+
AT4G33360	NAD(P)-binding Rossmann-fold superfamily protein	SAR+
AT4G33910	Probable prolyl 4-hydroxylase 9	SAR+
AT4G34150	Calcium-dependent lipid-binding (CaLB domain) family protein	SAR+
AT4G34180	Cyclase-like protein 1	SAR+
AT4G34230	Cinnamyl alcohol dehydrogenase 5	SAR+
AT4G34450	Coatomer subunit gamma	SAR+
AT4G34480	Glucan endo-1,3-beta-glucosidase 7	SAR+
AT4G35230	Serine/threonine-protein kinase BSK1	SAR+
AT4G35310	CPK5	SAR+
AT4G36090	ALKBH9C, ATALKBH9C	SAR+
AT4G36210	Protein of unknown function (DUF726)	SAR+
AT4G36750	Probable NAD(P)H dehydrogenase (quinone) FQR1-like 2	SAR+
AT4G36945	PLC-like phosphodiesterases superfamily protein	SAR+
AT4G37640	CALCIUM ATPASE 2	SAR+
AT4G38550	Arabidopsis phospholipase-like protein (PEARLI 4) family	SAR+
AT4G39230	Isoflavone reductase homolog PCBER1	SAR+
AT4G39640	Glutathione hydrolase 1	SAR+
AT5G03160	DnaJ protein P58IPK homolog	SAR+
AT5G03290	Isocitrate dehydrogenase	SAR+
AT5G03340	Cell division control protein 48 homolog E	SAR+
AT5G03350	Lectin-like protein	SAR+
AT5G03490	UDP-glycosyltransferase 89A2	SAR+
AT5G03630	Monodehydroascorbate reductase 2	SAR+
AT5G04920	Vacuolar protein sorting-associated protein 36	SAR+
AT5G06320	NHL3	SAR+
AT5G06600	Ubiquitin carboxyl-terminal hydrolase 12	SAR+
AT5G07340	Calreticulin family protein	SAR+
AT5G07830	Heparanase-like protein 1	SAR+
AT5G08380	Alpha-galactosidase 1	SAR+
AT5G10760	Aspartyl protease AED1	SAR+
AT5G11920	Beta-fructofuranosidase, Insoluble isoenzyme CWINV6	SAR+
AT5G12290	DGS1	SAR+
AT5G12890	Glycosyltransferase (Fragment)	SAR+
AT5G14030	Translocon-associated protein subunit beta	SAR+
AT5G14930	Senescence-associated carboxylesterase 101	SAR+
AT5G15400	Probable ubiquitin conjugation factor E4	SAR+
AT5G16370	Probable acyl-activating enzyme 5, Peroxisomal	SAR+
AT5G16510	Glycosyltransferase (Fragment)	SAR+
AT5G16880	TOM1-like protein 1	SAR+
AT5G18470	Curculin-like (Mannose-binding) lectin family protein	SAR+
AT5G18480	Inositol phosphorylceramide glucuronosyltransferase 1	SAR+
AT5G19240	Uncharacterized GPI-anchored protein At5g19240	SAR+
AT5G19860	Transmembrane protein	SAR+
AT5G20660	24 kDa vacuolar protein-like	SAR+
AT5G22380	NAC-domain protein 90	SAR+
AT5G24530	Protein DOWNY MILDEW RESISTANCE 6	SAR+
AT5G24810	ABC1 family protein	SAR+
AT5G25250	Flotillin-like protein 1	SAR+
AT5G25265	Hydroxyproline O-arabinosyltransferase 1	SAR+
AT5G25440	Protein kinase superfamily protein	SAR+
AT5G26340	STP13	SAR+
AT5G26860	Lon protease 1	SAR+
AT5G28540	Mediator of RNA polymerase II transcription subunit 37a	SAR+
AT5G35080	OS9	SAR+
AT5G36880	Acetyl-coenzyme A synthetase, Chloroplastic/glyoxysomal	SAR+
AT5G37600	Glutamine synthetase cytosolic isozyme 1-1	SAR+
AT5G37720	THO complex subunit 4D	SAR+
AT5G38900	Thioredoxin superfamily protein	SAR+
AT5G38990	Probable receptor-like protein kinase At5g38990	SAR+
AT5G39050	Phenolic glucoside malonyltransferase 1	SAR+
AT5G39730	AIG2-like protein B	SAR+
AT5G39950	Thioredoxin H2	SAR+
AT5G40780	Lysine histidine transporter 1	SAR+
AT5G42020	Heat shock protein 70 (Hsp 70) family protein	SAR+
AT5G42830	HXXXD-type acyl-transferase family protein	SAR+
AT5G43910	PfkB-like carbohydrate kinase family protein	SAR+
AT5G44070	Phytochelatin synthase gene	SAR+
AT5G44390	Berberine bridge enzyme-like 25	SAR+
AT5G45380	DUR3	SAR+
AT5G45500	RNI-like superfamily protein	SAR+
AT5G45510	Probable disease resistance protein At5g45510	SAR+
AT5G46230	ABA responsive SVB family gene.	SAR+
AT5G47070	Probable serine/threonine-protein kinase PBL19	SAR+
AT5G47860	Gut esterase	SAR+
AT5G48380	Probably inactive leucine-rich repeat receptor-like protein kinase At5g48380	SAR+
AT5G48540	Cysteine-rich repeat secretory protein 55	SAR+
AT5G49570	Transglutaminase	SAR+
AT5G49760	Leucine rich receptor kinase. Encodes a receptor of extracellular reactive oxygen species.	SAR+
AT5G51570	Hypersensitive-induced response protein 4	SAR+
AT5G51830	Probable fructokinase-7	SAR+
AT5G52540	Keratin-associated protein, Putative (DUF819)	SAR+
AT5G52640	Heat shock protein 90-1	SAR+
AT5G52810	Protein SAR DEFICIENT 4	SAR+
AT5G53130	Cyclic nucleotide-gated ion channel 1	SAR+
AT5G53330	Proline-rich cell wall protein-like	SAR+
AT5G54430	Adenine nucleotide alpha hydrolases-like superfamily protein	SAR+
AT5G54500	Flavodoxin-like quinone reductase 1	SAR+
AT5G54860	Probable folate-biopterin transporter 4	SAR+
AT5G54940	Translation initiation factor SUI1 family protein;(source:Araport11)	SAR+
AT5G55130	Adenylyltransferase and sulfurtransferase MOCS3	SAR+
AT5G55450	Bifunctional inhibitor/lipid-transfer protein/seed storage 2S albumin superfamily protein	SAR+
AT5G56000	Hsp81.4	SAR+
AT5G56730	Insulinase (Peptidase family M16) protein	SAR+
AT5G57580	Calmodulin-binding protein 60 B	SAR+
AT5G58430	Exocyst complex component EXO70B1	SAR+
AT5G61210	SNP33	SAR+
AT5G61790	Calnexin 1	SAR+
AT5G62560	U-box domain-containing protein 41	SAR+
AT5G62740	HIR4	SAR+
AT5G64000	SAL2 phosphatase	SAR+
AT5G64120	Peroxidase	SAR+
AT5G64260	Protein EXORDIUM-like 2	SAR+
AT5G64370	Beta-ureidopropionase	SAR+
AT5G65110	Acyl-coenzyme A oxidase	SAR+
AT5G66600	Putative uncharacterized protein	SAR+
SAR+: SAR-induced genes
SAR-: SAR-repressed genes

## Sheet: Table S4
SI Appendix Table S4 Differentially expressed gene (DEGs) in the mutant of nac90-2 plants, compared to Wild-type.
ID	Annotation	nac90-2/WT log2 (FC)	P Value
AT5G57130	SMXL5 [Source:UniProtKB/TrEMBL;Acc:A0A178UNM9]	14.0093	5.02022e-06
AT2G46210	Delta(8)-fatty-acid desaturase 2 [Source:UniProtKB/Swiss-Prot;Acc:Q3EBF7]	13.5265	8.49647e-05
AT1G34120	Type I inositol polyphosphate 5-phosphatase 1 [Source:UniProtKB/Swiss-Prot;Acc:Q84MA2]	13.3804	0.00015613
AT4G12430	Probable trehalose-phosphate phosphatase F [Source:UniProtKB/Swiss-Prot;Acc:Q9SU39]	13.2698	0.000458387
AT5G18070	Phosphoacetylglucosamine mutase [Source:UniProtKB/Swiss-Prot;Acc:P57750]	13.1995	0.000389872
AT4G02400	U3 ribonucleoprotein (Utp) family protein [Source:UniProtKB/TrEMBL;Acc:F4JHI1]	13.1362	0.000579098
AT4G18430	Ras-related protein RABA1e [Source:UniProtKB/Swiss-Prot;Acc:O49513]	13.119	0.0027121
AT2G43140	Basic helix-loop-helix (BHLH) DNA-binding superfamily protein [Source:UniProtKB/TrEMBL;Acc:F4IQ66]	13.0634	0.00110567
AT3G51110	Tetratricopeptide repeat (TPR)-like superfamily protein [Source:UniProtKB/TrEMBL;Acc:F4J390]	12.9501	0.000898132
AT5G03260	Laccase-11 [Source:UniProtKB/Swiss-Prot;Acc:Q8VZA1]	12.9231	0.00124836
AT5G43790	Pentatricopeptide repeat-containing protein At5g43790 [Source:UniProtKB/Swiss-Prot;Acc:Q9FG85]	12.9206	0.00245161
AT2G02930	Glutathione S-transferase F3 [Source:UniProtKB/Swiss-Prot;Acc:Q9SLM6]	12.8396	0.0111299
AT3G54250	Diphosphomevalonate decarboxylase MVD2, peroxisomal [Source:UniProtKB/Swiss-Prot;Acc:F4JCU3]	12.8084	0.00254908
AT5G01340	Mitochondrial succinate-fumarate transporter 1 [Source:UniProtKB/Swiss-Prot;Acc:Q9M038]	12.7902	0.00165327
AT5G60040	DNA-directed RNA polymerase subunit [Source:UniProtKB/TrEMBL;Acc:F4JXF8]	12.7482	0.00269725
AT1G77620	p-loop containing nucleoside triphosphate hydrolases superfamily protein [Source:UniProtKB/TrEMBL;Acc:Q9CAP6]	12.7207	0.00216248
AT3G62690		12.7085	0.00405452
AT4G04745	At4g04745 [Source:UniProtKB/TrEMBL;Acc:Q6NL28]	12.6536	0.018663
AT5G49680	Protein KINKY POLLEN [Source:UniProtKB/Swiss-Prot;Acc:Q6IMT0]	12.6454	0.00286222
AT5G01640	PRA1 family protein [Source:UniProtKB/TrEMBL;Acc:A0A178UH31]	12.6454	0.00376041
AT5G15710	F-box/kelch-repeat protein At5g15710 [Source:UniProtKB/Swiss-Prot;Acc:Q9LFV5]	12.6142	0.00405811
AT4G23230	Cysteine-rich receptor-like protein kinase 15 [Source:UniProtKB/Swiss-Prot;Acc:Q8W4G6]	12.5762	0.00852148
AT1G29820	Magnesium transporter CorA-like family protein [Source:UniProtKB/TrEMBL;Acc:F4I348]	12.5643	0.00486626
AT3G26490	BTB/POZ domain-containing protein At3g26490 [Source:UniProtKB/Swiss-Prot;Acc:Q9LIM6]	12.5571	0.00417199
AT5G08350	GEM-like protein 4 [Source:UniProtKB/Swiss-Prot;Acc:Q9FTA0]	12.5555	0.00438728
AT4G22270	Transmembrane protein, putative (DUF3537) [Source:UniProtKB/TrEMBL;Acc:Q94AL2]	12.5167	0.00770919
AT2G45800	LIM domain-containing protein PLIM2a [Source:UniProtKB/Swiss-Prot;Acc:O80839]	12.5068	0.0262236
AT4G15990	Uncharacterized protein AT4g15990 [Source:UniProtKB/TrEMBL;Acc:O23448]	12.4589	0.00712246
AT5G53110	RING/U-box superfamily protein [Source:UniProtKB/TrEMBL;Acc:F4KJ04]	12.4426	0.0091181
AT4G24320	Ubiquitin carboxyl-terminal hydrolase family protein [Source:UniProtKB/TrEMBL;Acc:Q9STW2]	12.4383	0.0286747
AT3G22070	Proline-rich family protein [Source:UniProtKB/TrEMBL;Acc:Q9LRJ8]	12.4278	0.00890657
AT3G14395	At3g14395 [Source:UniProtKB/TrEMBL;Acc:Q8L923]	12.3835	0.0360894
AT2G34960	CAT5 [Source:UniProtKB/TrEMBL;Acc:A0A178VPZ9]	12.3799	0.0115233
AT4G30640	Putative F-box/LRR-repeat protein 19 [Source:UniProtKB/Swiss-Prot;Acc:Q9M096]	12.3544	0.0138626
AT4G30180	Transcription factor bHLH146 [Source:UniProtKB/Swiss-Prot;Acc:Q9SUM5]	12.3443	0.013201
AT1G24090	RNase H domain-containing protein [Source:UniProtKB/TrEMBL;Acc:F4I7R5]	12.3078	0.0237582
AT2G23150	Metal transporter Nramp3 [Source:UniProtKB/Swiss-Prot;Acc:Q9SNV9]	12.2944	0.0137062
AT5G50390	Pentatricopeptide repeat-containing protein At5g50390, chloroplastic [Source:UniProtKB/Swiss-Prot;Acc:Q9FK33]	12.2477	0.0110464
AT1G30730	Berberine bridge enzyme-like 11 [Source:UniProtKB/Swiss-Prot;Acc:Q9SA88]	12.2458	0.03726
AT1G17270	O-fucosyltransferase 5 [Source:UniProtKB/Swiss-Prot;Acc:Q84WU0]	12.2418	0.0171616
AT3G25510	Disease resistance protein (TIR-NBS-LRR class) family protein [Source:UniProtKB/TrEMBL;Acc:F4J910]	12.2368	0.0246575
AT4G33160	F-box family protein [Source:TAIR;Acc:AT4G33160]	12.2178	0.013094
AT5G61412	Putative uncharacterized protein [Source:UniProtKB/TrEMBL;Acc:Q9FLJ3]	12.2157	0.0426687
AT1G09995	At1g09995 [Source:UniProtKB/TrEMBL;Acc:Q29QC1]	12.1861	0.0180297
AT4G04940	Putative WD-repeat membrane protein [Source:UniProtKB/TrEMBL;Acc:Q93YS7]	12.1851	0.0177778
AT3G57680	Carboxyl-terminal-processing peptidase 3, chloroplastic [Source:UniProtKB/Swiss-Prot;Acc:F4J3G5]	12.184	0.0465791
AT5G38565	Probable FBD-associated F-box protein At5g38565 [Source:UniProtKB/Swiss-Prot;Acc:Q3E8L3]	12.1778	0.0295158
AT1G49832	#N/A	12.1664	0.0375961
AT2G29090	Abscisic acid 8'-hydroxylase 2 [Source:UniProtKB/Swiss-Prot;Acc:O81077]	12.1464	0.0276884
AT2G46290	Eukaryotic translation initiation factor 3 subunit I [Source:UniProtKB/TrEMBL;Acc:A0A178VR74]	12.141	0.0246596
AT2G37555	#N/A	12.1239	0.0486001
AT3G20420	Ribonuclease 3-like protein 2 [Source:UniProtKB/Swiss-Prot;Acc:Q9LTQ0]	12.0901	0.0242798
AT4G05520	EH domain-containing protein 2 [Source:UniProtKB/Swiss-Prot;Acc:B3LF48]	12.0802	0.0278161
AT2G26870	Non-specific phospholipase C2 [Source:UniProtKB/Swiss-Prot;Acc:O81020]	12.0735	0.0240413
AT4G13820	Disease resistance like protein [Source:UniProtKB/TrEMBL;Acc:Q8RXQ6]	12.0464	0.0302528
AT2G29760	Pentatricopeptide repeat-containing protein At2g29760, chloroplastic [Source:UniProtKB/Swiss-Prot;Acc:O82380]	12.0396	0.0192391
AT1G59560		12.0327	0.0338872
AT1G70650	Ran BP2/NZF zinc finger-like superfamily protein [Source:UniProtKB/TrEMBL;Acc:F4I6V2]	12.0247	0.02489
AT3G25440	Uncharacterized CRM domain-containing protein At3g25440, chloroplastic [Source:UniProtKB/Swiss-Prot;Acc:Q67XL4]	11.9884	0.030164
AT5G13290	Inactive leucine-rich repeat receptor-like protein kinase CORYNE [Source:UniProtKB/Swiss-Prot;Acc:Q9LYU7]	11.9778	0.0344245
AT5G21900	At5g21900 [Source:UniProtKB/TrEMBL;Acc:Q9C597]	11.9452	0.0280401
AT4G29560	Fanconi anemia group E protein FANCE protein [Source:UniProtKB/TrEMBL;Acc:Q9SU89]	11.893	0.0304847
AT1G31173	#N/A	11.8803	0.0329068
AT3G12070	Geranylgeranyl transferase type-2 subunit beta 2 [Source:UniProtKB/Swiss-Prot;Acc:Q9LHL5]	11.8778	0.0332445
AT1G51170	Serine/threonine-protein kinase UCN [Source:UniProtKB/Swiss-Prot;Acc:Q9SYB9]	11.8688	0.0412945
AT2G27790	RNA-binding (RRM/RBD/RNP motifs) family protein [Source:UniProtKB/TrEMBL;Acc:F4IGS5]	11.8324	0.0427991
AT3G21530	DNAse I-like superfamily protein [Source:UniProtKB/TrEMBL;Acc:Q9LVF3]	11.8297	0.0455125
AT4G12680	Expressed protein [Source:UniProtKB/TrEMBL;Acc:Q45GJ7]	11.8071	0.0355049
AT1G28530	Deneddylase [Source:UniProtKB/TrEMBL;Acc:Q84TH8]	11.7676	0.0376894
AT5G40570	Surfeit locus protein 2 (SURF2) [Source:UniProtKB/TrEMBL;Acc:A8MRG2]	11.6662	0.0466325
AT2G02140	Defensin-like protein 10 [Source:UniProtKB/Swiss-Prot;Acc:Q9ZUL8]	6.8622	0.00600779
AT5G52640	Heat shock protein 90-1 [Source:UniProtKB/Swiss-Prot;Acc:P27323]	6.5104	0.00869455
AT2G38760	Annexin [Source:UniProtKB/TrEMBL;Acc:A0A178W040]	6.4501	0.00247948
AT5G55400	Fimbrin-3 [Source:UniProtKB/Swiss-Prot;Acc:Q9FJ70]	6.4263	0.00240689
AT1G65484	unknown protein; FUNCTIONS IN: molecular_function unknown; INVOLVED IN: biological_process unknown; LOCATED IN: endomembrane system; Has 30201 Blast hits to 17322 proteins in 780 species: Archae - 12; Bacteria - 1396; Metazoa - 17338; Fungi - 3422; /.../ - 5037; Viruses - 0; Other Eukaryotes - 2996 (source: NCBI BLink). [Source:TAIR;Acc:AT1G65484]	6.4054	0.00311033
AT3G19270	CYP707A4 [Source:UniProtKB/TrEMBL;Acc:A0A178VA28]	6.3906	0.00330998
AT5G26880	AGL26 [Source:UniProtKB/TrEMBL;Acc:A0A178UI04]	6.3883	0.00198688
AT5G60285	#N/A	6.232	0.00753178
AT3G61160	Protein kinase superfamily protein [Source:UniProtKB/TrEMBL;Acc:F4JE58]	6.1819	0.0073853
AT3G16740	F-box/kelch-repeat protein At3g16740 [Source:UniProtKB/Swiss-Prot;Acc:Q9LUQ9]	6.0855	9.1183e-05
AT4G28180	At4g28180 [Source:UniProtKB/TrEMBL;Acc:Q9M0I9]	6.0494	0.0053013
AT1G54217	Ribosomal protein L18ae family [Source:UniProtKB/TrEMBL;Acc:F4HV88]	6.0386	0.0180775
AT3G63530	BB2 [Source:UniProtKB/TrEMBL;Acc:A0A178VG02]	6.0127	0.0315976
AT3G03810	Protein EMBRYO SAC DEVELOPMENT ARREST 30 [Source:UniProtKB/Swiss-Prot;Acc:F4J2C8]	6.0077	0.00581961
AT1G72950	Disease resistance protein (TIR-NBS class) [Source:UniProtKB/TrEMBL;Acc:Q9SSN1]	5.9701	0.00844378
AT5G47960	SMG1 [Source:UniProtKB/TrEMBL;Acc:A0A178UQI5]	5.9228	0.037918
AT1G71180	Probable 3-hydroxyisobutyrate dehydrogenase-like 3, mitochondrial [Source:UniProtKB/Swiss-Prot;Acc:Q949M8]	5.895	0.00181083
AT4G05130	Equilibrative nucleotide transporter 4 [Source:UniProtKB/Swiss-Prot;Acc:Q9M0Y2]	5.8847	0.0316021
AT5G52410	CONTAINS InterPro DOMAIN/s: S-layer homology domain (InterPro:IPR001119); BEST Arabidopsis thaliana protein match is: unknown protein (TAIR:AT5G23890.1); Has 30201 Blast hits to 17322 proteins in 780 species: Archae - 12; Bacteria - 1396; Metazoa - /.../ Fungi - 3422; Plants - 5037; Viruses - 0; Other Eukaryotes - 2996 (source: NCBI BLink). [Source:TAIR;Acc:AT5G52410]	5.853	0.0161294
AT3G12530	DNA replication complex GINS protein PSF2 [Source:UniProtKB/Swiss-Prot;Acc:Q9C7A8]	5.853	0.030892
AT4G23000	Calcineurin-like metallo-phosphoesterase superfamily protein [Source:TAIR;Acc:AT4G23000]	5.8346	0.0169929
AT3G03060	P-loop containing nucleoside triphosphate hydrolases superfamily protein [Source:UniProtKB/TrEMBL;Acc:Q0WVF7]	5.7918	0.0299232
AT3G47360	11-beta-hydroxysteroid dehydrogenase-like 3 [Source:UniProtKB/Swiss-Prot;Acc:Q9STY7]	5.7693	0.0122704
AT3G15720	Probable polygalacturonase At3g15720 [Source:UniProtKB/Swiss-Prot;Acc:Q9LW07]	5.7686	0.0156867
AT2G26310	FAP2 [Source:UniProtKB/TrEMBL;Acc:A0A178VYJ7]	5.754	0.0199703
AT1G10770	At1g10770 [Source:UniProtKB/TrEMBL;Acc:Q9SAC5]	5.7465	0.0303215
AT1G67120	ATPases;nucleotide binding;ATP binding;nucleoside-triphosphatases;transcription factor binding [Source:TAIR;Acc:AT1G67120]	5.7437	0.000887516
AT5G44280	RING 1A [Source:UniProtKB/TrEMBL;Acc:F4K8U4]	5.7379	0.029226
AT1G16780	Pyrophosphate-energized membrane proton pump 3 [Source:UniProtKB/Swiss-Prot;Acc:Q9FWR2]	5.7076	0.0107995
AT4G27370	P-loop containing nucleoside triphosphate hydrolases superfamily protein [Source:TAIR;Acc:AT4G27370]	5.7014	0.0313069
AT3G48440	Zinc finger CCCH domain-containing protein 43 [Source:UniProtKB/Swiss-Prot;Acc:Q9STM4]	5.6986	0.0216971
AT2G24230	Probable LRR receptor-like serine/threonine-protein kinase At2g24230 [Source:UniProtKB/Swiss-Prot;Acc:C0LGK9]	5.6753	0.0256941
AT5G10710	Centromere protein O [Source:UniProtKB/TrEMBL;Acc:Q8GUP4]	5.6706	0.0014964
AT5G41160	purine permease 12 [Source:TAIR;Acc:AT5G41160]	5.6488	0.0446334
AT3G25940	DNA-directed RNA polymerase subunit [Source:UniProtKB/TrEMBL;Acc:Q9LU97]	5.6065	0.000884617
AT2G23470	Protein root UVB sensitive 4 [Source:UniProtKB/Swiss-Prot;Acc:Q67YT8]	5.5581	0.0192984
AT2G40110	Protein yippee-like [Source:UniProtKB/TrEMBL;Acc:Q8LE51]	5.5394	0.00359614
AT2G35190	Novel plant SNARE 11 [Source:UniProtKB/Swiss-Prot;Acc:Q944A9]	5.5371	0.0333053
AT3G14940	Phosphoenolpyruvate carboxylase 3 [Source:UniProtKB/Swiss-Prot;Acc:Q84VW9]	5.534	0.0327043
AT3G44320	Nitrilase 3 [Source:UniProtKB/Swiss-Prot;Acc:P46010]	5.5316	0.0188291
AT3G30380	Alpha/beta-Hydrolases superfamily protein [Source:UniProtKB/TrEMBL;Acc:Q9LI62]	5.5277	0.00325439
AT4G24530	O-fucosyltransferase 31 [Source:UniProtKB/Swiss-Prot;Acc:Q7Y030]	5.5189	0.00326758
AT1G51860	Probable LRR receptor-like serine/threonine-protein kinase At1g51860 [Source:UniProtKB/Swiss-Prot;Acc:C0LGG4]	5.5146	0.000195799
AT2G44700	F-box/kelch-repeat protein At2g44700 [Source:UniProtKB/Swiss-Prot;Acc:Q84RE1]	5.4983	0.0386044
AT2G32200	unknown protein; BEST Arabidopsis thaliana protein match is: unknown protein (TAIR:AT2G32210.1); Has 131 Blast hits to 131 proteins in 14 species: Archae - 0; Bacteria - 0; Metazoa - 0; Fungi - 1; Plants - 130; Viruses - 0; Other Eukaryotes - 0 (sou /.../CBI BLink). [Source:TAIR;Acc:AT2G32200]	5.4897	0.0442898
AT1G07300	josephin protein-related [Source:TAIR;Acc:AT1G07300]	5.4444	0.0231017
AT2G36370	BTB/POZ domain-containing protein FBL11 [Source:UniProtKB/Swiss-Prot;Acc:Q8S8F2]	5.4368	0.0281644
AT3G27550	RNA-binding CRS1 / YhbY (CRM) domain protein [Source:UniProtKB/TrEMBL;Acc:A0A1I9LTS8]	5.4352	0.0463792
AT5G50450	F-box protein At5g50450 [Source:UniProtKB/Swiss-Prot;Acc:Q9FK27]	5.4301	0.00576008
AT2G14620	Probable xyloglucan endotransglucosylase/hydrolase protein 10 [Source:UniProtKB/Swiss-Prot;Acc:Q9ZVK1]	5.4002	0.00522694
AT5G58210	AT5G58210 protein [Source:UniProtKB/TrEMBL;Acc:Q8GWS7]	5.3972	0.028152
AT2G44798	#N/A	5.3828	0.00223101
AT3G53860	INO80 complex subunit D-like protein [Source:UniProtKB/TrEMBL;Acc:Q9M340]	5.3444	0.0278776
AT5G26680	Flap endonuclease 1 [Source:UniProtKB/TrEMBL;Acc:F4K191]	5.3126	0.0428129
AT2G41905	At2g41905 [Source:UniProtKB/TrEMBL;Acc:Q3EBI2]	5.3088	0.000145584
AT1G26380	Berberine bridge enzyme-like 3 [Source:UniProtKB/Swiss-Prot;Acc:Q9FZC4]	5.2826	0.0029564
AT2G30942	Protein of unknown function (DUF3317) [Source:TAIR;Acc:AT2G30942]	5.2796	0.00473274
AT3G44350	NAC domain containing protein 61 [Source:UniProtKB/TrEMBL;Acc:B3H506]	5.2641	0.0334477
AT3G53650	Histone H2B.8 [Source:UniProtKB/Swiss-Prot;Acc:Q9LFF6]	5.2603	0.0107516
AT1G67530	RING-type E3 ubiquitin transferase [Source:UniProtKB/TrEMBL;Acc:A0A178W7M9]	5.2596	0.000524454
AT1G55610	Serine/threonine-protein kinase BRI1-like 1 [Source:UniProtKB/Swiss-Prot;Acc:Q9ZWC8]	5.2429	0.00964278
AT2G46780	At2g46780 [Source:UniProtKB/TrEMBL;Acc:Q501B0]	5.2414	0.0440072
AT1G08180	Cyclin-dependent protein kinase inhibitor SMR2 [Source:UniProtKB/Swiss-Prot;Acc:Q9SGE2]	5.2178	0.00491249
AT5G03990	FK506-binding-like protein [Source:UniProtKB/TrEMBL;Acc:Q93XY4]	5.2142	0.00520989
AT1G26420	Berberine bridge enzyme-like 7 [Source:UniProtKB/Swiss-Prot;Acc:Q9FZC8]	5.205	0.0111827
AT1G44130	Eukaryotic aspartyl protease family protein [Source:UniProtKB/TrEMBL;Acc:Q9C6Y5]	5.2004	0.00657528
AT3G48600	SWIB complex BAF60b domain-containing protein [Source:UniProtKB/TrEMBL;Acc:F4JF32]	5.1693	0.0206004
AT2G19390	Expressed protein [Source:UniProtKB/TrEMBL;Acc:O64572]	5.1643	0.000674505
AT5G01215	#N/A	5.1387	0.0481669
AT4G13030	P-loop containing nucleoside triphosphate hydrolases superfamily protein [Source:TAIR;Acc:AT4G13030]	5.1133	0.00827233
AT1G20350	Mitochondrial import inner membrane translocase subunit TIM17-1 [Source:UniProtKB/Swiss-Prot;Acc:Q9LN27]	5.1133	0.01432
AT4G22710	Cytochrome P450 - like protein [Source:UniProtKB/TrEMBL;Acc:O49652]	5.1109	0.0180478
AT2G39980	At2g39980/T28M21.14 [Source:UniProtKB/TrEMBL;Acc:O04201]	5.0816	0.0134164
AT4G21890	At4g21890 [Source:UniProtKB/TrEMBL;Acc:O49712]	5.0805	0.0339432
AT3G26320	Cytochrome P450 71B36 [Source:UniProtKB/Swiss-Prot;Acc:Q9LIP4]	5.038	0.00192726
AT1G67980	Putative caffeoyl-CoA O-methyltransferase At1g67980 [Source:UniProtKB/Swiss-Prot;Acc:Q9C9W3]	5.0343	0.0264572
AT1G65510	unknown protein; FUNCTIONS IN: molecular_function unknown; INVOLVED IN: N-terminal protein myristoylation; LOCATED IN: endomembrane system; EXPRESSED IN: 9 plant structures; EXPRESSED DURING: LP.06 six leaves visible, LP.04 four leaves visible, 4 an /.../, petal differentiation and expansion stage, LP.08 eight leaves visible; BEST Arabidopsis thaliana protein match is: unknown protein (TAIR:AT1G6…	5.0145	0.00831998
AT3G53320	At3g53320 [Source:UniProtKB/TrEMBL;Acc:Q9LFI5]	5.0111	0.025227
AT1G55080	Mediator of RNA polymerase II transcription subunit 9 [Source:UniProtKB/Swiss-Prot;Acc:Q8RWA2]	4.9973	0.00443478
AT3G07525	ATG10 [Source:UniProtKB/TrEMBL;Acc:A0A178V865]	4.9904	0.00313319
AT3G20015	Protein ASPARTIC PROTEASE IN GUARD CELL 2 [Source:UniProtKB/Swiss-Prot;Acc:Q9LHE3]	4.969	0.00625848
AT3G15750	Essential protein Yae1, N-terminal [Source:UniProtKB/TrEMBL;Acc:Q9LW04]	4.9492	0.00907086
AT3G22980	Ribosomal protein S5/Elongation factor G/III/V family protein [Source:UniProtKB/TrEMBL;Acc:F4J2T9]	4.943	0.00205275
AT5G42140	Regulator of chromosome condensation (RCC1) family with FYVE zinc finger domain [Source:TAIR;Acc:AT5G42140]	4.9199	0.0159959
AT5G26980	Syntaxin-41 [Source:UniProtKB/Swiss-Prot;Acc:O65359]	4.9194	0.000432151
AT1G71210	Pentatricopeptide repeat-containing protein At1g71210, mitochondrial [Source:UniProtKB/Swiss-Prot;Acc:Q8GZA6]	4.8931	0.00607361
AT2G29580	Zinc finger CCCH domain-containing protein 25 [Source:UniProtKB/Swiss-Prot;Acc:Q9ZW36]	4.8828	0.00234443
AT3G25110	Oleoyl-acyl carrier protein thioesterase 1, chloroplastic [Source:UniProtKB/Swiss-Prot;Acc:Q42561]	4.8658	0.0193493
AT5G40230	WAT1-related protein At5g40230 [Source:UniProtKB/Swiss-Prot;Acc:F4KHA8]	4.8606	0.00746755
AT2G19870	tRNA/rRNA methyltransferase (SpoU) family protein [Source:UniProtKB/TrEMBL;Acc:Q8W497]	4.8505	0.000954689
AT3G24900	Receptor like protein 39 [Source:UniProtKB/TrEMBL;Acc:A0A1I9LR86]	4.848	0.0191706
AT4G36680	Pentatricopeptide repeat-containing protein At4g36680, mitochondrial [Source:UniProtKB/Swiss-Prot;Acc:Q9M065]	4.7549	0.0235271
AT1G05000	Phosphotyrosine protein phosphatases superfamily protein [Source:UniProtKB/TrEMBL;Acc:F4I780]	4.748	0.0254989
AT3G13050	Organic cation/carnitine transporter 7 [Source:UniProtKB/Swiss-Prot;Acc:Q940M4]	4.7405	0.00167006
AT4G39364	#N/A	4.7239	0.038314
AT5G65200	U-box domain-containing protein 38 [Source:UniProtKB/Swiss-Prot;Acc:Q9FJP6]	4.7154	0.0316472
AT2G20100	basic helix-loop-helix (bHLH) DNA-binding superfamily protein [Source:TAIR;Acc:AT2G20100]	4.6949	0.0173542
AT5G66640	DA1-related protein 3 [Source:TAIR;Acc:AT5G66640]	4.6842	0.00306957
AT2G05260	Alpha/beta-Hydrolases superfamily protein [Source:UniProtKB/TrEMBL;Acc:Q9SJ35]	4.6809	0.00337232
AT2G13810	EDTS5 [Source:UniProtKB/TrEMBL;Acc:A0A178VQ02]	4.6716	0.00588801
AT3G13620	PUT4 [Source:UniProtKB/TrEMBL;Acc:A0A178VLM5]	4.6519	0.00841841
AT1G55020	Linoleate 9S-lipoxygenase 1 [Source:UniProtKB/Swiss-Prot;Acc:Q06327]	4.6505	0.0125003
AT3G21520	Protein DMP1 [Source:UniProtKB/Swiss-Prot;Acc:Q9LVF4]	4.6439	0.0408329
AT1G11210	At1g11210/T28P6_5 [Source:UniProtKB/TrEMBL;Acc:Q9SXA7]	4.6412	0.0295017
AT3G48290	Cytochrome P450, family 71, subfamily A, polypeptide 24 [Source:UniProtKB/TrEMBL;Acc:F4JDX0]	4.6158	0.0300092
AT4G23310	Putative cysteine-rich receptor-like protein kinase 23 [Source:UniProtKB/Swiss-Prot;Acc:O65482]	4.6037	0.00877903
AT4G21520	Transducin/WD40 repeat-like superfamily protein [Source:UniProtKB/TrEMBL;Acc:Q8H1R6]	4.5979	0.025682
AT1G12290	Probable disease resistance protein At1g12290 [Source:UniProtKB/Swiss-Prot;Acc:P60839]	4.5957	0.00717086
AT1G73260	Kunitz trypsin inhibitor 1 [Source:UniProtKB/Swiss-Prot;Acc:Q8RXD5]	4.5679	0.000186862
AT1G77550	At1g77550 [Source:UniProtKB/TrEMBL;Acc:Q6IDC7]	4.5586	0.00306482
AT1G53035	unknown protein; FUNCTIONS IN: molecular_function unknown; INVOLVED IN: biological_process unknown; LOCATED IN: endomembrane system; EXPRESSED IN: 23 plant structures; EXPRESSED DURING: 13 growth stages; BEST Arabidopsis thaliana protein match is: u /.../ protein (TAIR:AT3G15358.1); Has 49 Blast hits to 49 proteins in 9 species: Archae - 0; Bacteria - 0; Metazoa - 0; Fungi - 0; Plants - 49; Virus…	4.5566	0.00321114
AT3G29670	Phenolic glucoside malonyltransferase 2 [Source:UniProtKB/Swiss-Prot;Acc:Q9LRQ8]	4.5458	0.00358361
AT4G15570	Probable helicase MAGATAMA 3 [Source:UniProtKB/Swiss-Prot;Acc:B6SFA4]	4.5373	0.0145696
AT2G02980	Pentatricopeptide repeat-containing protein At2g02980, chloroplastic [Source:UniProtKB/Swiss-Prot;Acc:Q8LK93]	4.5149	0.0331496
AT1G68400	Probable leucine-rich repeat receptor-like protein kinase At1g68400 [Source:UniProtKB/Swiss-Prot;Acc:Q9M9C5]	4.49	0.0401011
AT2G43000	Transcription factor JUNGBRUNNEN 1 [Source:UniProtKB/Swiss-Prot;Acc:Q9SK55]	4.4725	0.0365663
AT5G44572	Transmembrane protein [Source:UniProtKB/TrEMBL;Acc:Q0WML3]	4.4708	1.87443e-05
AT5G09290	3'(2'),5'-bisphosphate nucleotidase-like protein [Source:UniProtKB/TrEMBL;Acc:Q0WTK9]	4.4661	6.34555e-05
AT4G26810	At4g26810 [Source:UniProtKB/TrEMBL;Acc:Q9SZ21]	4.4509	0.0163361
AT2G44380	At2g44380 [Source:UniProtKB/TrEMBL;Acc:O64872]	4.4443	0.0315776
AT2G17700	Serine/threonine-protein kinase STY8 [Source:UniProtKB/Swiss-Prot;Acc:O22558]	4.4361	0.000563816
AT1G21390	Emb2170 [Source:UniProtKB/TrEMBL;Acc:A0A178W1S8]	4.4301	0.0154817
AT4G06410	#N/A	4.4226	0.0443239
AT3G53810	L-type lectin-domain containing receptor kinase IV.2 [Source:UniProtKB/Swiss-Prot;Acc:Q9M345]	4.4076	0.0121166
AT4G39670	ACD11 homolog protein [Source:UniProtKB/Swiss-Prot;Acc:Q8L7U7]	4.3779	0.0264555
AT3G48040	ROP10 [Source:UniProtKB/TrEMBL;Acc:A0A178VHB5]	4.3679	0.000467204
AT1G34180	NAC domain containing protein 16 [Source:TAIR;Acc:AT1G34180]	4.3643	0.00685176
AT2G44240	At2g44240/F4I1.5 [Source:UniProtKB/TrEMBL;Acc:O64859]	4.3447	0.00197419
AT1G19980	Cytomatrix protein-like protein [Source:UniProtKB/TrEMBL;Acc:Q84JE5]	4.3313	0.0159648
AT4G21400	Cysteine-rich receptor-like protein kinase 28 [Source:UniProtKB/Swiss-Prot;Acc:O65405]	4.311	0.0027858
AT5G41580	E4 SUMO-protein ligase PIAL2 [Source:UniProtKB/Swiss-Prot;Acc:F4JYG0]	4.3106	0.0187521
AT3G18260	Reticulon-like protein B9 [Source:UniProtKB/Swiss-Prot;Acc:Q9LJQ5]	4.2949	0.0047125
AT3G46090	ZAT7 [Source:UniProtKB/TrEMBL;Acc:A0A178VI57]	4.284	1.22733e-05
AT5G61600	Ethylene-responsive transcription factor ERF104 [Source:UniProtKB/Swiss-Prot;Acc:Q9FKG1]	4.2824	0.004357
AT3G15518	Putative uncharacterized protein [Source:UniProtKB/TrEMBL;Acc:Q8GYA5]	4.2819	0.0155168
AT2G43590	Endochitinase At2g43590 [Source:UniProtKB/Swiss-Prot;Acc:O24658]	4.2804	0.0262353
AT2G27180	Expressed protein [Source:UniProtKB/TrEMBL;Acc:Q9SHT0]	4.2683	0.0208511
AT1G17590	Uncharacterized protein At1g17590 (Fragment) [Source:UniProtKB/TrEMBL;Acc:C0SUW0]	4.2471	0.0303921
AT2G29110	Glutamate receptor [Source:UniProtKB/TrEMBL;Acc:A0A178VW76]	4.2417	0.00242196
AT1G12530	Putative uncharacterized protein [Source:UniProtKB/TrEMBL;Acc:Q5Q0H6]	4.2318	0.00681958
AT2G30150	UDP-Glycosyltransferase superfamily protein [Source:TAIR;Acc:AT2G30150]	4.1898	0.00180927
AT1G03260	At1g03260 [Source:UniProtKB/TrEMBL;Acc:Q6NMJ6]	4.1892	0.00628529
AT1G17690	U3 small nucleolar RNA-associated protein [Source:UniProtKB/TrEMBL;Acc:Q8H1E7]	4.1812	0.00919807
AT5G38250	LEAF RUST 10 DISEASE-RESISTANCE LOCUS RECEPTOR-LIKE PROTEIN KINASE-like 2.3 [Source:UniProtKB/Swiss-Prot;Acc:F4KA51]	4.1794	0.00805883
AT3G25870	unknown protein; BEST Arabidopsis thaliana protein match is: unknown protein (TAIR:AT1G13360.1); Has 50 Blast hits to 50 proteins in 12 species: Archae - 0; Bacteria - 0; Metazoa - 0; Fungi - 0; Plants - 50; Viruses - 0; Other Eukaryotes - 0 (source /.../ BLink). [Source:TAIR;Acc:AT3G25870]	4.1681	0.00433423
AT1G12790	Protein PARTING DANCERS [Source:UniProtKB/Swiss-Prot;Acc:F4IDW9]	4.161	0.0275063
AT1G26200	TRAM, LAG1 and CLN8 (TLC) lipid-sensing domain containing protein [Source:TAIR;Acc:AT1G26200]	4.1604	0.0172152
AT2G39280	Ypt/Rab-GAP domain of gyp1p superfamily protein [Source:UniProtKB/TrEMBL;Acc:F4IUX9]	4.1423	0.00055044
AT1G76950	PH, RCC1 and FYVE domains-containing protein 1 [Source:UniProtKB/Swiss-Prot;Acc:Q947D2]	4.1285	0.0410568
AT1G03960	Probable serine/threonine protein phosphatase 2A regulatory subunit B''epsilon [Source:UniProtKB/Swiss-Prot;Acc:Q84JI6]	4.124	0.0183645
AT4G30360	Cyclic nucleotide and calmodulin-regulated ion channel-like protein [Source:UniProtKB/TrEMBL;Acc:Q0WUI2]	4.0987	0.000935131
AT5G46520	Disease resistance protein (TIR-NBS-LRR class) family [Source:TAIR;Acc:AT5G46520]	4.093	0.0129934
AT2G32140	Transmembrane receptor [Source:UniProtKB/TrEMBL;Acc:F4ISS7]	4.0882	3.65033e-05
AT1G05785	Got1/Sft2-like vescicle transport protein family [Source:TAIR;Acc:AT1G05785]	4.0804	0.0193716
AT1G76120	tRNA pseudouridine synthase [Source:UniProtKB/TrEMBL;Acc:Q9SGS1]	4.0554	0.0272789
AT3G03440	ARM repeat superfamily protein [Source:UniProtKB/TrEMBL;Acc:F4J139]	4.0522	0.0194525
AT3G49730	Pentatricopeptide repeat-containing protein At3g49730 [Source:UniProtKB/Swiss-Prot;Acc:P0C8A0]	4.048	0.0400789
AT2G30080	ZIP6 [Source:UniProtKB/TrEMBL;Acc:A0A178VN05]	4.0367	0.0356499
AT5G15700	DNA-directed RNA polymerase [Source:UniProtKB/TrEMBL;Acc:F4KB75]	4.0248	0.0133777
AT2G34940	VSR5 [Source:UniProtKB/TrEMBL;Acc:A0A384KPH5]	4.0231	0.0222943
AT3G54150	Embryonic abundant protein-like [Source:UniProtKB/TrEMBL;Acc:Q9M389]	4.0142	0.00730107
AT3G10120	At3g10120 [Source:UniProtKB/TrEMBL;Acc:Q8GY70]	4.0028	0.0441888
AT5G22020	At5g22020 [Source:UniProtKB/TrEMBL;Acc:Q9C586]	3.9988	0.00142294
AT1G14230	Probable apyrase 4 [Source:UniProtKB/Swiss-Prot;Acc:Q8H1D8]	3.9971	0.000169547
AT5G22520	At5g22520 [Source:UniProtKB/TrEMBL;Acc:Q9FK87]	3.991	0.0399724
AT2G40080	Protein EARLY FLOWERING 4 [Source:UniProtKB/Swiss-Prot;Acc:O04211]	3.9823	0.00428767
AT3G18160	Peroxin 3-1 [Source:UniProtKB/TrEMBL;Acc:F4J7K3]	3.9797	0.0309586
AT2G42870	Transcription factor PAR1 [Source:UniProtKB/Swiss-Prot;Acc:Q9SJH0]	3.9757	0.0133573
AT2G46150	Late embryogenesis abundant (LEA) hydroxyproline-rich glycoprotein family [Source:UniProtKB/TrEMBL;Acc:O82354]	3.9725	0.0305906
AT5G02550	At5g02550 [Source:UniProtKB/TrEMBL;Acc:Q9LZ47]	3.9458	0.0368432
AT3G07080	At3g07080 [Source:UniProtKB/TrEMBL;Acc:Q9SFT8]	3.9432	0.0362546
AT3G07540	Formin-like protein 10 [Source:UniProtKB/Swiss-Prot;Acc:Q9SRR2]	3.9386	0.0177942
AT2G03150	Protein SHORT ROOT IN SALT MEDIUM 1 [Source:UniProtKB/Swiss-Prot;Acc:F4IS91]	3.9224	0.00579934
AT2G20585	Nuclear fusion defective 6 [Source:UniProtKB/TrEMBL;Acc:A0A1P8B0U7]	3.9182	0.0143769
AT5G61570	Protein kinase superfamily protein [Source:UniProtKB/TrEMBL;Acc:F4K3J7]	3.9063	0.0350758
AT1G69520	S-adenosyl-L-methionine-dependent methyltransferases superfamily protein [Source:TAIR;Acc:AT1G69520]	3.8975	0.0309344
AT3G05670	F18C1.6 protein [Source:UniProtKB/TrEMBL;Acc:Q9M9X2]	3.8934	0.00583092
AT4G17500	Ethylene-responsive transcription factor 1A [Source:UniProtKB/Swiss-Prot;Acc:O80337]	3.8811	0.000189992
AT4G17250	AT4g17250/dl4660w [Source:UniProtKB/TrEMBL;Acc:Q93ZA8]	3.8692	0.00449159
AT1G02470	Polyketide cyclase/dehydrase and lipid transport superfamily protein [Source:UniProtKB/TrEMBL;Acc:F4HXI8]	3.8595	0.0232411
AT1G24530	F21J9.19 [Source:UniProtKB/TrEMBL;Acc:Q9FYL1]	3.848	0.00755802
AT1G73875	Carbon catabolite repressor protein 4 homolog 5 [Source:UniProtKB/Swiss-Prot;Acc:Q0WKY2]	3.8475	0.0116358
AT1G01680	U-box domain-containing protein 54 [Source:UniProtKB/Swiss-Prot;Acc:Q9LQ92]	3.8467	0.000717396
AT5G51465		3.8436	0.000841634
AT2G18680	unknown protein; FUNCTIONS IN: molecular_function unknown; INVOLVED IN: biological_process unknown; LOCATED IN: endomembrane system; EXPRESSED IN: male gametophyte, pollen tube; EXPRESSED DURING: L mature pollen stage, M germinated pollen stage; BES /.../idopsis thaliana protein match is: unknown protein (TAIR:AT2G18690.1); Has 30201 Blast hits to 17322 proteins in 780 species: Archae - 12; Bacte…	3.8288	0.0125948
AT1G12850	At1g12850/F13K23_8 [Source:UniProtKB/TrEMBL;Acc:Q94BZ6]	3.825	0.000896425
AT1G67000	LEAF RUST 10 DISEASE-RESISTANCE LOCUS RECEPTOR-LIKE PROTEIN KINASE-like 2.8 [Source:UniProtKB/Swiss-Prot;Acc:Q3ECH2]	3.819	0.00510767
AT5G54880	AT5g54880/MBG8_15 [Source:UniProtKB/TrEMBL;Acc:Q9FFU2]	3.8165	0.0284825
AT5G25150	Transcription initiation factor TFIID subunit 5 [Source:UniProtKB/Swiss-Prot;Acc:Q6S7B0]	3.8056	0.00461312
AT3G49850	Telomere repeat-binding factor 3 [Source:UniProtKB/Swiss-Prot;Acc:Q9M2X3]	3.8012	0.0215395
AT2G27200	GTPase LSG1-1 [Source:UniProtKB/Swiss-Prot;Acc:Q9SHS8]	3.8002	0.0327881
AT3G07520	Glutamate receptor 1.4 [Source:UniProtKB/Swiss-Prot;Acc:Q8LGN1]	3.7931	0.0402712
AT1G09900	Pentatricopeptide repeat-containing protein At1g09900 [Source:UniProtKB/Swiss-Prot;Acc:Q3EDF8]	3.7885	0.038555
AT4G02330	Probable pectinesterase/pectinesterase inhibitor 41 [Source:UniProtKB/Swiss-Prot;Acc:Q8RXK7]	3.7883	0.0137533
AT2G40030	DNA-directed RNA polymerase V subunit 1 [Source:UniProtKB/Swiss-Prot;Acc:Q5D869]	3.7713	0.0292782
AT1G32350	AOX1D [Source:UniProtKB/TrEMBL;Acc:A0A384LFI3]	3.7574	0.0305023
AT1G49180	Serine/threonine-protein kinase ATG1t [Source:UniProtKB/Swiss-Prot;Acc:F4I1N8]	3.7467	0.00823852
AT3G07040	Disease resistance protein RPM1 [Source:UniProtKB/Swiss-Prot;Acc:Q39214]	3.7345	0.0287823
AT2G30920	Ubiquinone biosynthesis O-methyltransferase, mitochondrial [Source:UniProtKB/Swiss-Prot;Acc:O49354]	3.7329	0.00592395
AT1G64670	alpha/beta-Hydrolases superfamily protein [Source:TAIR;Acc:AT1G64670]	3.7201	0.0269557
AT3G52040	2,3-bisphosphoglycerate-dependent phosphoglycerate mutase [Source:UniProtKB/TrEMBL;Acc:Q9SV00]	3.7179	0.0072627
AT5G57480	AAA-ATPase At5g57480 [Source:UniProtKB/Swiss-Prot;Acc:Q9FKM3]	3.7013	0.0114417
AT2G48110	Mediator of RNA polymerase II transcription subunit 33B [Source:UniProtKB/Swiss-Prot;Acc:F4IN69]	3.6988	0.00469364
AT1G68990	DNA-directed RNA polymerase [Source:UniProtKB/TrEMBL;Acc:F4I0I3]	3.6982	0.0249429
AT5G18780	FBD-associated F-box protein At5g18780 [Source:UniProtKB/Swiss-Prot;Acc:Q56YH2]	3.6956	0.0109176
AT5G04520	3-oxoacyl-[acyl-carrier-protein] synthase-like protein [Source:UniProtKB/TrEMBL;Acc:Q9LZ73]	3.6925	0.0309846
AT5G48240	unknown protein; FUNCTIONS IN: molecular_function unknown; INVOLVED IN: biological_process unknown; LOCATED IN: nucleolus; EXPRESSED IN: cultured cell; CONTAINS InterPro DOMAIN/s: Protein of unknown function DUF1665 (InterPro:IPR012459); Has 402 Bla /.../s to 382 proteins in 162 species: Archae - 0; Bacteria - 4; Metazoa - 139; Fungi - 111; Plants - 54; Viruses - 1; Other Eukaryotes - 93 (source:…	3.692	0.0119592
AT2G47160	HCO3-transporter family [Source:UniProtKB/TrEMBL;Acc:A8MS82]	3.6897	0.0194746
AT1G56060	unknown protein; BEST Arabidopsis thaliana protein match is: unknown protein (TAIR:AT2G32210.1); Has 180 Blast hits to 180 proteins in 22 species: Archae - 0; Bacteria - 0; Metazoa - 0; Fungi - 10; Plants - 170; Viruses - 0; Other Eukaryotes - 0 (so /.../NCBI BLink). [Source:TAIR;Acc:AT1G56060]	3.6746	0.00502013
AT5G47100	Calcineurin B-like protein 9 [Source:UniProtKB/Swiss-Prot;Acc:Q9LTB8]	3.6555	0.0364321
AT4G30370	RING-H2 finger protein ATL14 [Source:UniProtKB/Swiss-Prot;Acc:Q9M0C3]	3.6298	0.0426011
AT5G62290	Chloride conductance regulatory protein ICln [Source:UniProtKB/Swiss-Prot;Acc:Q9LVA7]	3.6297	0.000969644
AT1G35210	Uncharacterized protein T32G9.25 [Source:UniProtKB/TrEMBL;Acc:Q9C6F2]	3.6279	0.0175684
AT1G58420	At1g58420 [Source:UniProtKB/TrEMBL;Acc:Q9C647]	3.6146	0.015749
AT1G51965	ABA Overly-Sensitive 5 [Source:TAIR;Acc:AT1G51965]	3.6009	0.0326655
AT3G58690	Protein kinase superfamily protein [Source:UniProtKB/TrEMBL;Acc:F4J5Y7]	3.5995	0.020624
AT5G45140	DNA-directed RNA polymerase III subunit 2 [Source:UniProtKB/Swiss-Prot;Acc:F4KD38]	3.5879	0.0339961
AT4G29420	F-box/LRR-repeat protein At4g29420 [Source:UniProtKB/Swiss-Prot;Acc:Q9M0E1]	3.582	0.0396428
AT3G29180	AT3G29180 protein [Source:UniProtKB/TrEMBL;Acc:Q9LI95]	3.5783	0.0117351
AT4G21903	Protein DETOXIFICATION [Source:UniProtKB/TrEMBL;Acc:F4JKB8]	3.5753	0.0113331
AT3G53030	Ser/arg-rich protein kinase 4 [Source:UniProtKB/TrEMBL;Acc:F4J982]	3.5744	0.00494891
AT1G25280	Tubby-like F-box protein 10 [Source:UniProtKB/Swiss-Prot;Acc:Q9FRH7]	3.5682	0.000728438
AT1G77220	Protein LAZ1 homolog 1 [Source:UniProtKB/Swiss-Prot;Acc:Q94CA0]	3.5594	0.0256793
AT5G12260	AT5g12260/MXC9_22 [Source:UniProtKB/TrEMBL;Acc:Q9FMN8]	3.5486	0.0352143
AT5G13565		3.5479	0.00945189
AT3G22160	VQ motif-containing protein 22 [Source:UniProtKB/Swiss-Prot;Acc:Q9LIE6]	3.5256	2.30939e-05
AT5G11920	Beta-fructofuranosidase, insoluble isoenzyme CWINV6 [Source:UniProtKB/Swiss-Prot;Acc:Q8W4S6]	3.4861	4.84173e-05
AT5G54300	Cotton fiber expressed protein 1-like protein [Source:UniProtKB/TrEMBL;Acc:Q9FL70]	3.4737	0.00867682
AT1G14170	F7A19.25 protein [Source:UniProtKB/TrEMBL;Acc:Q9XI71]	3.4649	0.00491696
AT1G56550	UDP-D-xylose:L-fucose alpha-1,3-D-xylosyltransferase 3 [Source:UniProtKB/Swiss-Prot;Acc:Q9FXA7]	3.4547	0.0224639
AT3G54740	Uncharacterized protein T5N23_100 [Source:UniProtKB/TrEMBL;Acc:Q9M1S6]	3.4517	0.0191062
AT2G06510	Replication protein A 70 kDa DNA-binding subunit A [Source:UniProtKB/Swiss-Prot;Acc:Q9SKI4]	3.444	0.0475839
AT4G26190	Haloacid dehalogenase-like hydrolase (HAD) superfamily protein [Source:UniProtKB/TrEMBL;Acc:F4JU71]	3.4418	0.00313761
AT1G28190	F3H9.15 protein [Source:UniProtKB/TrEMBL;Acc:Q9FZ93]	3.4412	0.0107478
AT2G22100	UBP1-associated proteins 1B [Source:UniProtKB/Swiss-Prot;Acc:Q9SHZ5]	3.4277	0.0323634
AT2G04660	APC2 [Source:UniProtKB/TrEMBL;Acc:A0A178VYA9]	3.4252	0.0294711
AT1G29785	#N/A	3.4196	0.00275876
AT2G45720	ARM repeat superfamily protein [Source:UniProtKB/TrEMBL;Acc:O64651]	3.4109	0.0256212
AT1G52800	2-oxoglutarate (2OG) and Fe(II)-dependent oxygenase superfamily protein [Source:UniProtKB/TrEMBL;Acc:Q9C938]	3.3984	0.0236357
AT1G13970	Beta-hexosaminidase (DUF1336) [Source:UniProtKB/TrEMBL;Acc:Q9XI89]	3.3884	0.0392069
AT4G34412	At4g34412 [Source:UniProtKB/TrEMBL;Acc:Q6NMZ4]	3.3875	0.00882555
AT3G29035	NAC domain-containing protein 59 [Source:UniProtKB/Swiss-Prot;Acc:Q9LJW3]	3.3861	0.0371591
AT2G22475	GLABRA2 expression modulator [Source:UniProtKB/Swiss-Prot;Acc:Q8S8F8]	3.3783	0.0309586
AT2G32400	Glutamate receptor 3.7 [Source:UniProtKB/Swiss-Prot;Acc:Q9SDQ4]	3.3731	0.0211793
AT1G72060	Serine-type endopeptidase inhibitor [Source:UniProtKB/TrEMBL;Acc:Q9C7G9]	3.3705	0.00832833
AT5G59680	Probable LRR receptor-like serine/threonine-protein kinase At5g59680 [Source:UniProtKB/Swiss-Prot;Acc:Q9FN93]	3.3531	0.0377495
AT1G14900	HMG-Y-related protein A [Source:UniProtKB/Swiss-Prot;Acc:Q43386]	3.3505	0.0473486
AT2G32295	EXS (ERD1/XPR1/SYG1) family protein [Source:UniProtKB/TrEMBL;Acc:F4ISV2]	3.3352	0.0485671
AT5G45020	AT5g45020/K21C13_21 [Source:UniProtKB/TrEMBL;Acc:Q9FL95]	3.3344	0.0340847
AT1G60080	3'-5'-exoribonuclease family protein [Source:UniProtKB/TrEMBL;Acc:Q9ZUI4]	3.3261	0.0346102
AT1G65483	Putative uncharacterized protein [Source:UniProtKB/TrEMBL;Acc:Q1G3X9]	3.3178	0.00235831
AT5G14530	Protein ANTHESIS POMOTING FACTOR 1 [Source:UniProtKB/Swiss-Prot;Acc:Q9LYK6]	3.3151	0.00687051
AT1G05810	RAB GTPase homolog A5E [Source:TAIR;Acc:AT1G05810]	3.3149	0.0141642
AT2G18850	At2g18850 [Source:UniProtKB/TrEMBL;Acc:Q5PNU0]	3.3137	0.0292738
AT2G28360	SIT4 phosphatase-associated family protein [Source:UniProtKB/TrEMBL;Acc:F4IIN7]	3.3122	0.00735579
AT1G02405	At1g02405 [Source:UniProtKB/TrEMBL;Acc:Q6NMD9]	3.3027	0.0492967
AT1G69360	Plant protein of unknown function (DUF863) [Source:TAIR;Acc:AT1G69360]	3.2915	0.00145094
AT2G30020	PP2C-type phosphatase AP2C1 [Source:UniProtKB/TrEMBL;Acc:F6LPR5]	3.2904	0.0357743
AT5G26920	Calmodulin-binding protein 60 G [Source:UniProtKB/Swiss-Prot;Acc:F4K2R6]	3.2863	6.89595e-08
AT5G12350	Regulator of chromosome condensation (RCC1) family with FYVE zinc finger domain-containing protein [Source:UniProtKB/TrEMBL;Acc:F4K0X5]	3.2785	0.0122736
AT5G51260	Acid phosphatase [Source:UniProtKB/TrEMBL;Acc:Q9LU48]	3.2709	0.0498179
AT3G15460	Ribosome biogenesis protein BRX1 homolog 1 [Source:UniProtKB/Swiss-Prot;Acc:Q9LE16]	3.2664	0.0247301
AT5G44010	unknown protein; Has 28 Blast hits to 26 proteins in 11 species: Archae - 0; Bacteria - 0; Metazoa - 0; Fungi - 0; Plants - 28; Viruses - 0; Other Eukaryotes - 0 (source: NCBI BLink). [Source:TAIR;Acc:AT5G44010]	3.2547	0.0468631
AT5G60960	PNM1 [Source:UniProtKB/TrEMBL;Acc:A0A178U8V9]	3.2331	0.00279856
AT2G30770	Indoleacetaldoxime dehydratase [Source:UniProtKB/Swiss-Prot;Acc:O49342]	3.2208	0.00166606
AT5G27420	E3 ubiquitin-protein ligase ATL31 [Source:UniProtKB/Swiss-Prot;Acc:Q8LGA5]	3.2181	0.00136299
AT5G48330	Putative regulator of chromosome condensation (Cell cycle regulatory protein) [Source:UniProtKB/TrEMBL;Acc:Q8GYL6]	3.2029	0.0291587
AT1G16690	Enhancer of polycomb-like protein [Source:UniProtKB/TrEMBL;Acc:A0A178W458]	3.1988	0.0310819
AT1G66090	Disease resistance protein (TIR-NBS class) [Source:UniProtKB/TrEMBL;Acc:Q9C515]	3.1874	0.021562
AT4G20780	Calcium-binding protein CML42 [Source:UniProtKB/Swiss-Prot;Acc:Q9SVG9]	3.1829	0.00357713
AT3G08990	Protein yippee-like At3g08990 [Source:UniProtKB/Swiss-Prot;Acc:Q9SR97]	3.1812	0.0213125
AT1G63670	Uncharacterized protein F24D7.14 [Source:UniProtKB/TrEMBL;Acc:Q9CAD2]	3.1809	0.00990906
AT5G64150	At5g64156 [Source:UniProtKB/TrEMBL;Acc:Q9FMI5]	3.178	0.011318
AT5G23240	Chaperone protein dnaJ C76, chloroplastic [Source:UniProtKB/Swiss-Prot;Acc:Q9FMX6]	3.1774	7.28643e-05
AT5G50915	Transcription factor bHLH137 [Source:UniProtKB/Swiss-Prot;Acc:Q93W88]	3.1637	0.0480881
AT2G27660	Cysteine/Histidine-rich C1 domain family protein [Source:UniProtKB/TrEMBL;Acc:Q9ZUW8]	3.1453	0.0242191
AT4G12770	Auxilin-related protein 2 [Source:UniProtKB/Swiss-Prot;Acc:Q0WQ57]	3.144	0.0135915
AT3G22190	IQD5 [Source:UniProtKB/TrEMBL;Acc:A0A384K8F3]	3.1111	0.0208168
AT5G33290	Glycosyltransferase (Fragment) [Source:UniProtKB/TrEMBL;Acc:W8PUC9]	3.1066	0.0084049
AT5G15860	Isoprenylcysteine alpha-carbonyl methylesterase ICME [Source:UniProtKB/Swiss-Prot;Acc:Q94AS5]	3.104	0.0326642
AT5G46260	Disease resistance protein (TIR-NBS-LRR class) family [Source:UniProtKB/TrEMBL;Acc:Q9FL35]	3.1017	0.0171668
AT1G18390	Protein kinase superfamily protein [Source:TAIR;Acc:AT1G18390]	3.1004	0.01537
AT2G17110	Protein of unknown function (DUF630 and DUF632) [Source:TAIR;Acc:AT2G17110]	3.0988	0.0380131
AT1G03730	At1g03730 [Source:UniProtKB/TrEMBL;Acc:Q1ECK0]	3.0984	0.00544271
AT3G01080	WRKY DNA-binding protein 58 [Source:UniProtKB/TrEMBL;Acc:A0A1I9LLS8]	3.0949	0.0274295
AT3G51860	Vacuolar cation/proton exchanger [Source:UniProtKB/TrEMBL;Acc:A0A1I9LSS9]	3.0946	5.88908e-14
AT3G25010	Receptor like protein 41 [Source:UniProtKB/TrEMBL;Acc:A0A1I9LTP5]	3.0936	2.23096e-07
AT1G66920	LEAF RUST 10 DISEASE-RESISTANCE LOCUS RECEPTOR-LIKE PROTEIN KINASE-like 2.4 [Source:UniProtKB/Swiss-Prot;Acc:F4HQ22]	3.0877	0.00423804
AT1G53230	TCP3 [Source:UniProtKB/TrEMBL;Acc:A0A178WDV9]	3.0873	0.00216888
AT1G80120	Protein LURP-one-related 5 [Source:UniProtKB/Swiss-Prot;Acc:Q9SSC7]	3.0824	0.0412406
AT3G11420	At3g11420 [Source:UniProtKB/TrEMBL;Acc:Q9CAY4]	3.0815	0.0221092
AT4G16900	Disease resistance protein (TIR-NBS-LRR class) family [Source:UniProtKB/TrEMBL;Acc:F4JNB2]	3.0813	0.0264811
AT5G54490		3.0812	0.0184595
AT5G54080	Homogentisate 1,2-dioxygenase [Source:UniProtKB/Swiss-Prot;Acc:Q9ZRA2]	3.066	0.0130942
AT5G20630	Germin-like protein subfamily 3 member 3 [Source:UniProtKB/Swiss-Prot;Acc:P94072]	3.0632	0.000507157
AT4G22350	Ubiquitin C-terminal hydrolases superfamily protein [Source:UniProtKB/TrEMBL;Acc:F4JL64]	3.0614	0.00934699
AT5G08610	PDE340 [Source:UniProtKB/TrEMBL;Acc:A0A178UFQ6]	3.0481	0.0453014
AT4G26600	S-adenosyl-L-methionine-dependent methyltransferases superfamily protein [Source:TAIR;Acc:AT4G26600]	3.0471	0.0224662
AT2G12550	At2g12550 [Source:UniProtKB/TrEMBL;Acc:Q500V3]	3.0438	0.00726926
AT2G41240	BHLH100 [Source:UniProtKB/TrEMBL;Acc:A0A384LFW4]	3.0422	0.024948
AT1G51890	Leucine-rich repeat protein kinase family protein [Source:TAIR;Acc:AT1G51890]	3.0384	0.035699
AT5G61250	GUS1 [Source:UniProtKB/TrEMBL;Acc:A0A384LHC0]	3.0347	0.0261172
AT4G31920	Two-component response regulator ARR10 [Source:UniProtKB/Swiss-Prot;Acc:O49397]	3.0338	0.0144685
AT5G59560	Protein SENSITIVITY TO RED LIGHT REDUCED 1 [Source:UniProtKB/Swiss-Prot;Acc:Q8GWZ6]	3.0243	0.0412335
AT2G27840	Histone deacetylase HDT4 [Source:UniProtKB/Swiss-Prot;Acc:Q9M4T3]	3.0154	0.013269
AT2G22840		3.0065	0.0210377
AT5G24200	alpha/beta-Hydrolases superfamily protein [Source:TAIR;Acc:AT5G24200]	3.0052	9.23617e-05
AT3G24090	GFAT [Source:UniProtKB/TrEMBL;Acc:A0A384L621]	2.9885	0.0366845
AT2G01330	Actin-interacting protein 1-1 [Source:UniProtKB/Swiss-Prot;Acc:Q9ZU34]	2.9869	0.0343681
AT5G27710	At5g27710 [Source:UniProtKB/TrEMBL;Acc:Q6NM16]	2.9836	0.0447866
AT3G22460	O-acetylserine (thiol) lyase (OAS-TL) isoform A2 [Source:TAIR;Acc:AT3G22460]	2.9812	0.0334288
AT1G02816	F22D16.19 protein [Source:UniProtKB/TrEMBL;Acc:Q9SRX5]	2.9807	0.0457211
AT4G27860	vacuolar iron transporter (VIT) family protein [Source:TAIR;Acc:AT4G27860]	2.9807	0.0174981
AT4G33540	Metallo-beta-lactamase family protein [Source:UniProtKB/TrEMBL;Acc:Q8RWE1]	2.9722	0.0021896
AT1G08050	T6D22.13 [Source:UniProtKB/TrEMBL;Acc:Q9LN03]	2.9719	0.00154231
AT3G08630	Protein RETICULATA-RELATED 2, chloroplastic [Source:UniProtKB/Swiss-Prot;Acc:Q9C9Z3]	2.9707	0.0274311
AT1G66960	Terpenoid cyclases family protein [Source:TAIR;Acc:AT1G66960]	2.9696	0.0289372
AT5G40240	WAT1-related protein [Source:UniProtKB/TrEMBL;Acc:F4KHA9]	2.9605	0.00251699
AT5G19310	Probable ATP-dependent DNA helicase CHR23 [Source:UniProtKB/Swiss-Prot;Acc:F4K128]	2.9567	0.0277664
AT4G39830	At4g39830 [Source:UniProtKB/TrEMBL;Acc:O65670]	2.953	0.0262757
AT5G49220	Uncharacterized protein At5g49220 [Source:UniProtKB/TrEMBL;Acc:Q8VZK6]	2.9498	0.0270983
AT2G25000	Probable WRKY transcription factor 60 [Source:UniProtKB/Swiss-Prot;Acc:Q9SK33]	2.9484	0.00224122
AT3G53350	ROP interactive partner 4 [Source:UniProtKB/TrEMBL;Acc:A0A1I9LNX3]	2.9475	0.0431633
AT5G35910	Protein RRP6-like 2 [Source:UniProtKB/Swiss-Prot;Acc:A9LLI7]	2.9363	0.0169292
AT1G10170	NF-X-like 1 [Source:TAIR;Acc:AT1G10170]	2.9338	0.00576436
AT2G05755	At2g05755 [Source:UniProtKB/TrEMBL;Acc:Q8S8A2]	2.9321	0.0495112
AT3G21230	4-coumarate--CoA ligase 4 [Source:UniProtKB/Swiss-Prot;Acc:Q9LU36]	2.9287	0.0098319
AT1G61870	Pentatricopeptide repeat-containing protein At1g61870, mitochondrial [Source:UniProtKB/Swiss-Prot;Acc:Q8LE47]	2.9224	0.0222274
AT3G19990	E3 ubiquitin-protein ligase [Source:UniProtKB/TrEMBL;Acc:Q9LHE6]	2.9194	0.0116967
AT3G28510	AAA-ATPase At3g28510 [Source:UniProtKB/Swiss-Prot;Acc:Q9LH84]	2.9174	3.73491e-05
AT3G50770	Probable calcium-binding protein CML41 [Source:UniProtKB/Swiss-Prot;Acc:Q8L3R2]	2.9167	6.04046e-08
AT2G14610	Pathogenesis-related protein 1 [Source:UniProtKB/Swiss-Prot;Acc:P33154]	2.9057	2.39887e-10
AT5G47180	Vesicle-associated protein 2-1 [Source:UniProtKB/Swiss-Prot;Acc:Q9LVU1]	2.9016	0.0031894
AT5G37740	Calcium-dependent lipid-binding (CaLB domain) family protein [Source:UniProtKB/TrEMBL;Acc:F4K8L6]	2.901	0.032
AT1G65690	NDR1/HIN1-like protein 6 [Source:UniProtKB/Swiss-Prot;Acc:Q8LD98]	2.8919	0.00533982
AT3G61198	#N/A	2.8908	0.00857874
AT3G47060	ATP-dependent zinc metalloprotease FTSH 7, chloroplastic [Source:UniProtKB/Swiss-Prot;Acc:Q9SD67]	2.8858	0.00930479
AT3G23830	GRP4 [Source:UniProtKB/TrEMBL;Acc:A0A178VD35]	2.8826	0.00504943
AT1G31860	Histidine biosynthesis bifunctional protein hisIE, chloroplastic [Source:UniProtKB/Swiss-Prot;Acc:O82768]	2.8815	0.0293833
AT2G19540	Putative WD-40 repeat protein [Source:UniProtKB/TrEMBL;Acc:Q9ZUN8]	2.8694	0.0118248
AT5G27460	Pentatricopeptide repeat-containing protein At5g27460 [Source:UniProtKB/Swiss-Prot;Acc:Q3E911]	2.8633	0.028732
AT5G41360	XPB2 [Source:UniProtKB/TrEMBL;Acc:A0A178UFA0]	2.8572	0.0367864
AT2G29200	Pumilio homolog 1 [Source:UniProtKB/Swiss-Prot;Acc:Q9ZW07]	2.8549	0.0435051
AT4G23150		2.8525	0.028677
AT1G74360	Probable LRR receptor-like serine/threonine-protein kinase At1g74360 [Source:UniProtKB/Swiss-Prot;Acc:C0LGJ1]	2.8516	0.0372993
AT1G55460	KIN17-like protein [Source:UniProtKB/Swiss-Prot;Acc:Q9ZVU5]	2.8433	0.00303563
AT5G38900	Thioredoxin superfamily protein [Source:TAIR;Acc:AT5G38900]	2.8429	0.00298443
AT1G24140	Metalloendoproteinase 3-MMP [Source:UniProtKB/Swiss-Prot;Acc:Q5XF51]	2.839	0.00656346
AT3G44480	Disease resistance protein (TIR-NBS-LRR class) family [Source:UniProtKB/TrEMBL;Acc:A0A1I9LP82]	2.8384	0.000671886
AT4G23910	At4g23910 [Source:UniProtKB/TrEMBL;Acc:Q9T0A6]	2.8279	0.00913836
AT2G31280	conserved peptide upstream open reading frame 7 [Source:TAIR;Acc:AT2G31280]	2.8132	0.0287974
AT1G78280	F-box protein At1g78280 [Source:UniProtKB/Swiss-Prot;Acc:Q9M9E8]	2.805	0.0133855
AT4G27900	CCT motif family protein [Source:UniProtKB/TrEMBL;Acc:Q9SUE8]	2.8022	0.0097053
AT2G33490	Uncharacterized protein At2g33490 [Source:UniProtKB/Swiss-Prot;Acc:O22799]	2.7972	0.0230895
AT3G01830	Probable calcium-binding protein CML40 [Source:UniProtKB/Swiss-Prot;Acc:Q9SGI8]	2.7929	0.0115253
AT5G11240	At5g11240 [Source:UniProtKB/TrEMBL;Acc:B5X503]	2.7834	0.0217211
AT5G15770	Glucosamine 6-phosphate N-acetyltransferase [Source:UniProtKB/Swiss-Prot;Acc:Q9LFU9]	2.7829	0.0101393
AT2G34930	Disease resistance family protein / LRR family protein [Source:UniProtKB/TrEMBL;Acc:O64757]	2.7701	0.0380768
AT3G13560	Glucan endo-1,3-beta-glucosidase 4 [Source:UniProtKB/Swiss-Prot;Acc:Q94CD8]	2.7671	0.0352922
AT1G62200	Major facilitator superfamily protein [Source:TAIR;Acc:AT1G62200]	2.757	0.0304284
AT3G01670	Sieve element occlusion protein [Source:UniProtKB/TrEMBL;Acc:A0A1I9LMF2]	2.7569	0.0172421
AT1G28960	NUDX15 [Source:UniProtKB/TrEMBL;Acc:A0A178WAX9]	2.7565	0.0129524
AT5G16170	At5g16170 [Source:UniProtKB/TrEMBL;Acc:Q4V3A2]	2.7546	0.0144834
AT5G50200	High-affinity nitrate transporter 3.1 [Source:UniProtKB/Swiss-Prot;Acc:Q9FGS5]	2.7395	0.0103917
AT1G18570	Transcription factor MYB51 [Source:UniProtKB/Swiss-Prot;Acc:O49782]	2.7387	0.00027456
AT3G21080	ABC transporter-like protein [Source:UniProtKB/TrEMBL;Acc:Q9LJC4]	2.7372	0.0383236
AT1G24350	Acid phosphatase/vanadium-dependent haloperoxidase-related protein [Source:UniProtKB/TrEMBL;Acc:F4I989]	2.7355	0.00108721
AT1G75170	Sec14p-like phosphatidylinositol transfer family protein [Source:UniProtKB/TrEMBL;Acc:Q9FRK8]	2.7159	0.00778097
AT5G58350	Probable serine/threonine-protein kinase WNK4 [Source:UniProtKB/Swiss-Prot;Acc:Q9LVL5]	2.7145	0.00514025
AT5G20230	SAG14 [Source:UniProtKB/TrEMBL;Acc:A0A178UM84]	2.7129	8.96565e-05
AT5G27970	ARM repeat superfamily protein [Source:UniProtKB/TrEMBL;Acc:F4K5S0]	2.7106	0.00160794
AT4G13050	Oleoyl-acyl carrier protein thioesterase 2, chloroplastic [Source:UniProtKB/Swiss-Prot;Acc:Q9SV64]	2.6988	0.0223797
AT4G30890	Ubiquitin carboxyl-terminal hydrolase 24 [Source:UniProtKB/Swiss-Prot;Acc:Q9FPS3]	2.6902	0.000839863
AT3G10440	SHUGOSHIN 1 [Source:UniProtKB/Swiss-Prot;Acc:F4J3S1]	2.6895	0.0279756
AT1G77920	Transcription factor TGA7 [Source:UniProtKB/Swiss-Prot;Acc:Q93ZE2]	2.6893	0.011071
AT2G27150	Abscisic-aldehyde oxidase [Source:UniProtKB/Swiss-Prot;Acc:Q7G9P4]	2.6885	0.0183379
AT3G13080	MRP3 [Source:UniProtKB/TrEMBL;Acc:A0A178VHA7]	2.6884	0.0150609
AT5G08450	Zinc finger CCCH domain protein [Source:UniProtKB/TrEMBL;Acc:Q8RWV9]	2.6882	0.00806026
AT4G04490	Cysteine-rich receptor-like protein kinase 36 [Source:UniProtKB/Swiss-Prot;Acc:Q9XEC6]	2.6819	0.0238878
AT5G44750	DNA repair protein REV1 [Source:UniProtKB/Swiss-Prot;Acc:A3EWL3]	2.6771	0.0414566
AT2G17970	RNA demethylase ALKBH9B [Source:UniProtKB/Swiss-Prot;Acc:Q9SL49]	2.6767	0.0307239
AT3G28890	Receptor-like protein 43 [Source:UniProtKB/Swiss-Prot;Acc:Q9LJW7]	2.6728	0.0114727
AT5G16950	AT5g16950/F2K13_100 [Source:UniProtKB/TrEMBL;Acc:Q9LFK6]	2.6689	0.045178
AT1G11870	Serine--tRNA ligase, chloroplastic/mitochondrial [Source:UniProtKB/Swiss-Prot;Acc:Q8RWT8]	2.6684	0.0397275
AT5G08240	At5g08240 [Source:UniProtKB/TrEMBL;Acc:Q9LEY3]	2.6658	0.0180484
AT5G55060	Rab3 GTPase-activating protein catalytic subunit [Source:UniProtKB/TrEMBL;Acc:Q683D2]	2.6581	0.0495469
AT1G50570	At1g50570 [Source:UniProtKB/TrEMBL;Acc:Q9LPS7]	2.6546	0.00185155
AT1G27020	Plant/protein [Source:UniProtKB/TrEMBL;Acc:O04551]	2.6536	0.00627599
AT5G08230	Protein HUA2-LIKE 1 [Source:UniProtKB/Swiss-Prot;Acc:Q9LEY4]	2.6476	0.0355466
AT1G09870	At1g09870/F21M12_26 [Source:UniProtKB/TrEMBL;Acc:Q941B2]	2.6429	0.0408727
AT4G35140	Transducin/WD40 repeat-like superfamily protein [Source:TAIR;Acc:AT4G35140]	2.6415	0.0222074
AT1G64170	Cation/H(+) antiporter 16 [Source:UniProtKB/Swiss-Prot;Acc:Q1HDT3]	2.6398	0.0060884
AT3G04490	Exportin-4 protein [Source:UniProtKB/TrEMBL;Acc:A0A1I9LPW2]	2.6342	0.00964922
AT4G14548	#N/A	2.629	0.0357932
AT2G21188	#N/A	2.6281	0.00791564
AT5G39670	Probable calcium-binding protein CML46 [Source:UniProtKB/Swiss-Prot;Acc:Q93Z27]	2.627	0.000906898
AT1G17450	B-block binding subunit of TFIIIC [Source:UniProtKB/TrEMBL;Acc:F4I7J9]	2.6266	0.0185471
AT5G41970	Metal-dependent protein hydrolase [Source:UniProtKB/TrEMBL;Acc:F4K000]	2.6261	0.00645637
AT1G56120	Leucine-rich repeat transmembrane protein kinase [Source:UniProtKB/TrEMBL;Acc:F4I3K0]	2.625	0.000162496
AT4G34680	GATA transcription factor [Source:UniProtKB/TrEMBL;Acc:B9DGI2]	2.6246	0.0141442
AT3G10610	40S ribosomal protein S17-3 [Source:UniProtKB/Swiss-Prot;Acc:Q9SQZ1]	2.6197	0.000663599
AT1G12750	RHOMBOID-like protein 6, mitochondrial [Source:UniProtKB/Swiss-Prot;Acc:Q8VZ48]	2.6121	0.0198641
AT2G36220	At2g36220/F2H17.17 [Source:UniProtKB/TrEMBL;Acc:Q9SJN3]	2.6045	0.0386783
AT2G43980	Inositol 1,3,4-trisphosphate 5/6-kinase 4 [Source:UniProtKB/Swiss-Prot;Acc:O80568]	2.6004	0.0304727
AT2G45220	Probable pectinesterase/pectinesterase inhibitor 17 [Source:UniProtKB/Swiss-Prot;Acc:O22149]	2.5971	0.024703
AT3G59410	Protein kinase family protein [Source:UniProtKB/TrEMBL;Acc:F4J8A5]	2.5952	0.00847755
AT4G16690	Probable pheophorbidase [Source:UniProtKB/Swiss-Prot;Acc:O23512]	2.5941	0.0413257
AT5G62360	Plant invertase/pectin methylesterase inhibitor superfamily protein [Source:UniProtKB/TrEMBL;Acc:Q9LVA3]	2.5895	0.0122468
AT3G60640	Autophagy-related protein 8g [Source:UniProtKB/Swiss-Prot;Acc:Q9LZZ9]	2.586	0.0120176
AT5G43860	Chlorophyllase-2, chloroplastic [Source:UniProtKB/Swiss-Prot;Acc:Q9M7I7]	2.584	0.011938
AT5G19875	At5g19875 [Source:UniProtKB/TrEMBL;Acc:Q8L9M7]	2.5831	0.00455458
AT3G03980	NADPH-dependent aldehyde reductase-like protein, chloroplastic [Source:UniProtKB/Swiss-Prot;Acc:Q9SQR4]	2.5828	0.0418938
AT1G07240	UDP-glycosyltransferase 71C5 [Source:UniProtKB/Swiss-Prot;Acc:Q9FE68]	2.5757	0.0309076
AT3G11230	Protein yippee-like [Source:UniProtKB/TrEMBL;Acc:A8MQA7]	2.574	0.0131647
AT4G15180	Histone-lysine N-methyltransferase ATXR3 [Source:UniProtKB/Swiss-Prot;Acc:O23372]	2.5736	0.0246928
AT4G37430	CYP91A2 [Source:UniProtKB/TrEMBL;Acc:A0A178UXA9]	2.5715	0.00950233
AT1G44820	At1g44820 [Source:UniProtKB/TrEMBL;Acc:Q9LPE9]	2.5702	0.00912958
AT3G21060		2.5663	0.0326624
AT2G46400	Probable WRKY transcription factor 46 [Source:UniProtKB/Swiss-Prot;Acc:Q9SKD9]	2.5638	0.00437338
AT5G19660	S1P [Source:UniProtKB/TrEMBL;Acc:A0A178UNR0]	2.5617	0.0251247
AT1G61420	S-locus lectin protein kinase family protein [Source:TAIR;Acc:AT1G61420]	2.5608	0.0441038
AT3G10980	PLAC8 family protein [Source:UniProtKB/TrEMBL;Acc:Q8W4N1]	2.556	0.038136
AT2G27920	Serine carboxypeptidase-like 51 [Source:UniProtKB/Swiss-Prot;Acc:Q67Y83]	2.5537	0.023526
AT3G21140	Pyridoxamine 5'-phosphate oxidase family protein [Source:UniProtKB/TrEMBL;Acc:Q8L637]	2.5532	0.039348
AT4G08900	Arginase 1, mitochondrial [Source:UniProtKB/Swiss-Prot;Acc:P46637]	2.5522	0.0167033
AT1G13870	Protein KTI12 homolog [Source:UniProtKB/Swiss-Prot;Acc:Q9LMH0]	2.5437	0.0437328
AT1G01020	ARV1 family protein [Source:UniProtKB/TrEMBL;Acc:Q5MK24]	2.5389	0.0281566
AT4G13110	BSD domain-containing protein [Source:UniProtKB/TrEMBL;Acc:F4JS91]	2.5346	0.0129656
AT1G08600	CHR20 [Source:UniProtKB/TrEMBL;Acc:A0A178VZQ9]	2.5343	0.0457445
AT2G30600	BTB/POZ domain-containing protein [Source:UniProtKB/TrEMBL;Acc:F4INV5]	2.5316	0.00220761
AT3G07800	Thymidine kinase a [Source:UniProtKB/Swiss-Prot;Acc:Q9S750]	2.5291	0.00935346
AT5G59820	Zinc finger protein ZAT12 [Source:UniProtKB/Swiss-Prot;Acc:Q42410]	2.5245	0.00541432
AT5G52660	Protein REVEILLE 6 [Source:UniProtKB/Swiss-Prot;Acc:Q8H0W3]	2.5229	0.0311421
AT4G09550		2.5181	0.0173871
AT5G42400	SET domain protein 25 [Source:TAIR;Acc:AT5G42400]	2.5081	0.0485779
AT2G40095	Alpha/beta hydrolase related protein [Source:UniProtKB/TrEMBL;Acc:Q8GZ10]	2.5063	0.0297278
AT2G24592	#N/A	2.5062	0.0147717
AT5G40490	RNA-binding (RRM/RBD/RNP motifs) family protein [Source:UniProtKB/TrEMBL;Acc:Q9FM47]	2.4977	0.0161971
AT5G65575	#N/A	2.4957	0.0181838
AT3G06980	DEAD-box ATP-dependent RNA helicase 50 [Source:UniProtKB/Swiss-Prot;Acc:Q8GUG7]	2.4886	0.00517769
AT1G67920	At1g67920 [Source:UniProtKB/TrEMBL;Acc:Q9C9V8]	2.4857	0.0150326
AT5G07100	Probable WRKY transcription factor 26 [Source:UniProtKB/Swiss-Prot;Acc:Q9C5T3]	2.4832	0.0447029
AT1G50360	Myosin-3 [Source:UniProtKB/Swiss-Prot;Acc:F4I507]	2.4813	0.0301474
AT3G12810	Protein PHOTOPERIOD-INDEPENDENT EARLY FLOWERING 1 [Source:UniProtKB/Swiss-Prot;Acc:Q7X9V2]	2.4808	0.0387277
AT5G67340	U-box domain-containing protein 2 [Source:UniProtKB/Swiss-Prot;Acc:Q5XEZ8]	2.4801	0.0168306
AT5G55260	protein phosphatase X 2 [Source:TAIR;Acc:AT5G55260]	2.4764	0.0421508
AT4G00090	AT4g00090/F6N15_8 [Source:UniProtKB/TrEMBL;Acc:Q93ZN5]	2.474	0.0369804
AT5G47220	ERF2 [Source:UniProtKB/TrEMBL;Acc:A0A178UCP3]	2.4727	0.0184863
AT2G16365	F-box protein At2g16365 [Source:UniProtKB/Swiss-Prot;Acc:Q84V03]	2.4722	0.0245566
AT5G25930	Kinase family with leucine-rich repeat domain-containing protein [Source:UniProtKB/TrEMBL;Acc:Q9XGZ2]	2.4704	0.018119
AT4G23210	Cysteine-rich receptor-like protein kinase 13 [Source:UniProtKB/Swiss-Prot;Acc:Q0PW40]	2.4649	0.0370655
AT1G74590	Glutathione S-transferase U10 [Source:UniProtKB/Swiss-Prot;Acc:Q9CA57]	2.4642	0.0258073
AT5G09310	Probable gamma-secretase subunit PEN-2 [Source:UniProtKB/Swiss-Prot;Acc:Q9FY84]	2.4622	0.0157452
AT5G19680	Protein phosphatase 1 regulatory inhibitor subunit PPP1R7 homolog [Source:UniProtKB/Swiss-Prot;Acc:Q84WJ9]	2.4593	0.00830027
AT2G17710	At2g17710/T17A5.17 [Source:UniProtKB/TrEMBL;Acc:Q8W1E8]	2.4517	0.0122482
AT1G55090	Glutamine-dependent NAD(+) synthetase [Source:UniProtKB/Swiss-Prot;Acc:Q9C723]	2.4468	0.022624
AT5G20960	Indole-3-acetaldehyde oxidase [Source:UniProtKB/Swiss-Prot;Acc:Q7G193]	2.4459	0.0339527
AT2G39360	Probable receptor-like protein kinase At2g39360 [Source:UniProtKB/Swiss-Prot;Acc:O80623]	2.4428	0.0116543
AT4G25690	AT4G25690 protein [Source:UniProtKB/TrEMBL;Acc:Q9SZZ7]	2.435	0.0149495
AT4G18580	At4g18580 [Source:UniProtKB/TrEMBL;Acc:Q8LBN4]	2.4312	0.0245239
AT5G63280	C2H2-like zinc finger protein [Source:UniProtKB/TrEMBL;Acc:Q8VZP2]	2.4184	0.0313605
AT5G25250	Flotillin-like protein 1 [Source:UniProtKB/Swiss-Prot;Acc:Q501E6]	2.4153	0.000222731
AT5G56750	Protein NDL1 [Source:UniProtKB/Swiss-Prot;Acc:Q9FJT7]	2.4116	0.048911
AT4G39030	Protein DETOXIFICATION 47, chloroplastic [Source:UniProtKB/Swiss-Prot;Acc:Q945F0]	2.4105	0.00514255
AT2G16405	At2g16405 [Source:UniProtKB/TrEMBL;Acc:Q0V845]	2.4077	0.0488104
AT3G28100	WAT1-related protein At3g28100 [Source:UniProtKB/Swiss-Prot;Acc:Q9LRS5]	2.4048	0.027594
AT1G08820	VAP27-2 [Source:UniProtKB/TrEMBL;Acc:A0A178WBB7]	2.4023	0.00441242
AT2G29120	Glutamate receptor 2.7 [Source:UniProtKB/Swiss-Prot;Acc:Q8LGN0]	2.4022	0.00698701
AT3G56930	Probable protein S-acyltransferase 4 [Source:UniProtKB/Swiss-Prot;Acc:Q9M1K5]	2.3993	0.0209418
AT1G66725	#N/A	2.3965	0.0304954
AT1G15790	unknown protein; BEST Arabidopsis thaliana protein match is: unknown protein (TAIR:AT1G15780.1); Has 170 Blast hits to 94 proteins in 14 species: Archae - 0; Bacteria - 0; Metazoa - 0; Fungi - 0; Plants - 170; Viruses - 0; Other Eukaryotes - 0 (sour /.../BI BLink). [Source:TAIR;Acc:AT1G15790]	2.3948	0.0069129
AT2G38050	Steroid 5-alpha-reductase DET2 [Source:UniProtKB/Swiss-Prot;Acc:Q38944]	2.3907	0.0230945
AT1G49580		2.3877	0.0301212
AT2G30424	MYB-like transcription factor TCL2 [Source:UniProtKB/Swiss-Prot;Acc:B3H4X8]	2.3864	0.023563
AT3G09940	Monodehydroascorbate reductase 3 [Source:UniProtKB/Swiss-Prot;Acc:Q9SR59]	2.3839	0.0314894
AT5G58720	SMR domain-containing protein At5g58720 [Source:UniProtKB/Swiss-Prot;Acc:O65573]	2.372	0.0127666
AT5G55930	Oligopeptide transporter 1 [Source:UniProtKB/Swiss-Prot;Acc:Q9FG72]	2.3671	0.0145028
AT4G10500	Protein DMR6-LIKE OXYGENASE 1 [Source:UniProtKB/Swiss-Prot;Acc:Q9ZSA8]	2.3661	0.030761
AT2G39920	Uncharacterized protein At2g39920 [Source:UniProtKB/Swiss-Prot;Acc:O04195]	2.3594	0.011564
AT2G29350	SAG13 [Source:UniProtKB/TrEMBL;Acc:A0A178VTS8]	2.352	0.00263631
AT5G15730	Calcium/calmodulin-regulated receptor-like kinase 2 [Source:UniProtKB/Swiss-Prot;Acc:Q9LFV3]	2.3497	0.0440405
AT1G05300	Zinc transporter 5 [Source:UniProtKB/Swiss-Prot;Acc:O23039]	2.3469	0.0432503
AT5G64360	AT5G64360 protein [Source:UniProtKB/TrEMBL;Acc:Q9FMF3]	2.3461	0.0444975
AT2G04450	Nudix hydrolase 6 [Source:UniProtKB/Swiss-Prot;Acc:Q9SJC4]	2.3358	0.00757439
AT5G46050	Protein NRT1/ PTR FAMILY 5.2 [Source:UniProtKB/Swiss-Prot;Acc:Q9FNL7]	2.3352	0.022026
AT2G37585	Beta-glucuronosyltransferase GlcAT14C [Source:UniProtKB/Swiss-Prot;Acc:Q8S8P3]	2.3335	0.0298762
AT4G23140		2.3307	0.00589728
AT5G06910	Chaperone protein dnaJ 6 [Source:UniProtKB/Swiss-Prot;Acc:Q9FL54]	2.3155	0.0145642
AT4G39160	Homeodomain-like superfamily protein [Source:UniProtKB/TrEMBL;Acc:F4JVA4]	2.3154	0.0377885
AT4G27750	ISI1 [Source:UniProtKB/TrEMBL;Acc:A0A178URL9]	2.3137	0.0311685
AT4G24660	homeobox protein 22 [Source:TAIR;Acc:AT4G24660]	2.3095	0.0274791
AT3G16720	RING-H2 finger protein ATL2 [Source:UniProtKB/Swiss-Prot;Acc:Q8L9T5]	2.3073	0.00578447
AT5G13300	ADP-ribosylation factor GTPase-activating protein AGD3 [Source:UniProtKB/Swiss-Prot;Acc:Q5W7F2]	2.2977	0.0216397
AT1G33960	P-loop containing nucleoside triphosphate hydrolases superfamily protein [Source:TAIR;Acc:AT1G33960]	2.2929	0.00212672
AT4G01720	Probable WRKY transcription factor 47 [Source:UniProtKB/Swiss-Prot;Acc:Q9ZSI7]	2.2917	0.0208035
AT2G43410	Flowering time control protein FPA [Source:UniProtKB/Swiss-Prot;Acc:Q8LPQ9]	2.2893	0.0407994
AT2G22090	RNA-binding (RRM/RBD/RNP motifs) family protein [Source:UniProtKB/TrEMBL;Acc:F4IIL5]	2.288	0.0222609
AT1G21240	Wall-associated receptor kinase 3 [Source:UniProtKB/Swiss-Prot;Acc:Q9LMN8]	2.2867	0.0450054
AT4G17830	Peptidase M20/M25/M40 family protein [Source:UniProtKB/TrEMBL;Acc:F4JPZ7]	2.2776	0.000251072
AT3G25600	Probable calcium-binding protein CML16 [Source:UniProtKB/Swiss-Prot;Acc:Q9LI84]	2.2766	0.00858232
AT4G23330	BEST Arabidopsis thaliana protein match is: eukaryotic translation initiation factor 3A (TAIR:AT4G11420.1); Has 63 Blast hits to 55 proteins in 14 species: Archae - 0; Bacteria - 0; Metazoa - 1; Fungi - 0; Plants - 62; Viruses - 0; Other Eukaryotes /.../ource: NCBI BLink). [Source:TAIR;Acc:AT4G23330]	2.2682	0.0349892
AT3G19670	Pre-mRNA-processing protein 40B [Source:UniProtKB/Swiss-Prot;Acc:F4JCC1]	2.2676	0.02282
AT4G17670	FCS-Like Zinc finger 2 [Source:UniProtKB/Swiss-Prot;Acc:Q8VZM9]	2.2667	0.000631602
AT5G14950	Alpha-mannosidase 2 [Source:UniProtKB/Swiss-Prot;Acc:Q9LFR0]	2.2646	0.0139964
AT1G01990	At1g01990 [Source:UniProtKB/TrEMBL;Acc:Q9LPC2]	2.2582	0.012
AT3G12830	Auxin-responsive protein SAUR72 [Source:UniProtKB/Swiss-Prot;Acc:Q9LTV3]	2.2519	0.006293
AT3G53120	Vacuolar protein-sorting-associated protein 37 homolog 1 [Source:UniProtKB/Swiss-Prot;Acc:Q9SCP9]	2.2516	0.0415217
AT1G20640	Protein NLP4 [Source:UniProtKB/Swiss-Prot;Acc:Q9LE38]	2.2488	0.0216236
AT4G35480	RHA3B [Source:UniProtKB/TrEMBL;Acc:A0A178UXS9]	2.2478	0.047613
AT5G27120	Probable nucleolar protein 5-1 [Source:UniProtKB/Swiss-Prot;Acc:O04658]	2.2431	0.0450001
AT5G52760	Heavy metal-associated isoprenylated plant protein 14 [Source:UniProtKB/Swiss-Prot;Acc:Q9LTE1]	2.2421	0.00772483
AT4G12290	Amine oxidase [Source:UniProtKB/TrEMBL;Acc:Q8L742]	2.2421	0.00989459
AT3G54030	BSK6 [Source:UniProtKB/TrEMBL;Acc:A0A178VAE8]	2.2352	0.0241275
AT3G44600	Peptidyl-prolyl cis-trans isomerase CYP71 [Source:UniProtKB/Swiss-Prot;Acc:Q8W4D0]	2.2338	0.0269875
AT4G21540	SPHK1 [Source:UniProtKB/TrEMBL;Acc:A0A178V174]	2.2213	0.0339474
AT5G46450	Disease resistance protein (TIR-NBS-LRR class) family [Source:UniProtKB/TrEMBL;Acc:Q9FHG0]	2.2196	0.0201797
AT2G15390	Probable fucosyltransferase 4 [Source:UniProtKB/Swiss-Prot;Acc:Q9SJP2]	2.2182	0.0113889
AT2G24580	Probable sarcosine oxidase [Source:UniProtKB/Swiss-Prot;Acc:Q9SJA7]	2.2113	0.0233441
AT2G27310	F-box protein At2g27310 [Source:UniProtKB/Swiss-Prot;Acc:Q9XIN8]	2.2113	0.0149884
AT5G47860	AT5g47860/MCA23_20 [Source:UniProtKB/TrEMBL;Acc:Q9FIJ5]	2.2073	0.0020686
AT4G29900	Calcium-transporting ATPase 10, plasma membrane-type [Source:UniProtKB/Swiss-Prot;Acc:Q9SZR1]	2.2066	0.0004586
AT5G26710	Glutamate--tRNA ligase, cytoplasmic [Source:UniProtKB/Swiss-Prot;Acc:O82462]	2.2015	0.0141745
AT1G16260	Wall-associated receptor kinase-like 8 [Source:UniProtKB/Swiss-Prot;Acc:Q9SA25]	2.2	0.0497451
AT1G52380	Nuclear pore complex protein NUP50A [Source:UniProtKB/Swiss-Prot;Acc:Q9C829]	2.1966	0.012902
AT2G31350	Hydroxyacylglutathione hydrolase 2, mitochondrial [Source:UniProtKB/Swiss-Prot;Acc:Q9SID3]	2.1964	0.0132619
AT5G13470	At5g13470 [Source:UniProtKB/TrEMBL;Acc:Q9LYQ9]	2.1955	0.0454011
AT2G30250	Probable WRKY transcription factor 25 [Source:UniProtKB/Swiss-Prot;Acc:O22921]	2.1915	0.0114685
AT2G24050	Eukaryotic translation initiation factor isoform 4G-2 [Source:UniProtKB/Swiss-Prot;Acc:O82233]	2.1758	0.0466036
AT4G22190	Serine/arginine repetitive matrix-like protein [Source:UniProtKB/TrEMBL;Acc:Q8L4C5]	2.1758	0.00590663
AT4G18253	Receptor Serine/Threonine kinase-like protein [Source:UniProtKB/TrEMBL;Acc:A0A1P8B6P8]	2.1748	0.0152184
AT1G05840	Eukaryotic aspartyl protease family protein [Source:UniProtKB/TrEMBL;Acc:F4IAD5]	2.1716	0.0450784
AT1G51800	LRR receptor-like serine/threonine-protein kinase IOS1 [Source:UniProtKB/Swiss-Prot;Acc:Q9C8I6]	2.169	0.0499475
AT5G38830	Cysteine--tRNA ligase 2, cytoplasmic [Source:UniProtKB/Swiss-Prot;Acc:B3LFA4]	2.1676	0.0326814
AT5G57550	Probable xyloglucan endotransglucosylase/hydrolase protein 25 [Source:UniProtKB/Swiss-Prot;Acc:Q38907]	2.1644	0.0312569
AT2G32650	At2g32650 [Source:UniProtKB/TrEMBL;Acc:O48852]	2.1612	0.0198866
AT3G47490	HNH endonuclease [Source:UniProtKB/TrEMBL;Acc:A0A1I9LRA7]	2.1594	0.00818865
AT1G59590	At1g59590 [Source:UniProtKB/TrEMBL;Acc:Q9SLT9]	2.155	0.0476896
AT1G11175	#N/A	2.1289	0.0424484
AT4G08350	Putative transcription elongation factor SPT5 homolog 1 [Source:UniProtKB/Swiss-Prot;Acc:Q9STN3]	2.1249	0.0291884
AT2G25970	F17H15.1/F17H15.1 [Source:UniProtKB/TrEMBL;Acc:O82762]	2.1233	0.00109043
AT5G11040	Trafficking protein particle complex II-specific subunit 120 homolog [Source:UniProtKB/Swiss-Prot;Acc:Q9FY61]	2.1111	0.0437374
AT2G43570	CHI [Source:UniProtKB/TrEMBL;Acc:A0A178W3M3]	2.1075	0.000446554
AT2G32950	FUS1 [Source:UniProtKB/TrEMBL;Acc:A0A178VXE2]	2.1055	0.0241468
AT5G37600	Glutamine synthetase cytosolic isozyme 1-1 [Source:UniProtKB/Swiss-Prot;Acc:Q56WN1]	2.1027	0.000112747
AT2G42790	Citrate synthase [Source:UniProtKB/TrEMBL;Acc:Q0WUX6]	2.1019	0.0078519
AT3G27310	Plant UBX domain-containing protein 1 [Source:UniProtKB/Swiss-Prot;Acc:Q9LK22]	2.0955	0.0385492
AT1G30330	Auxin response factor 6 [Source:UniProtKB/Swiss-Prot;Acc:Q9ZTX8]	2.0948	0.0399023
AT1G62390	Protein CLMP1 [Source:UniProtKB/Swiss-Prot;Acc:O48802]	2.0935	0.0118226
AT3G47340	DIN6 [Source:UniProtKB/TrEMBL;Acc:A0A178VBT4]	2.0885	0.046516
AT3G50210	2-oxoglutarate (2OG) and Fe(II)-dependent oxygenase superfamily protein [Source:UniProtKB/TrEMBL;Acc:A0A178VCK6]	2.0883	0.0326655
AT5G14540	AT5G14540 protein [Source:UniProtKB/TrEMBL;Acc:B9DHK3]	2.0736	0.048479
AT4G10710	FACT complex subunit SPT16 [Source:UniProtKB/Swiss-Prot;Acc:O82491]	2.0703	0.0182283
AT3G51450	Protein STRICTOSIDINE SYNTHASE-LIKE 7 [Source:UniProtKB/Swiss-Prot;Acc:Q9SD04]	2.0675	0.0123225
AT4G00040	Type III polyketide synthase C [Source:UniProtKB/Swiss-Prot;Acc:O81305]	2.0674	0.0317824
AT5G23660	Bidirectional sugar transporter SWEET12 [Source:UniProtKB/Swiss-Prot;Acc:O82587]	2.0673	0.0379906
AT5G12480	CPK7 [Source:UniProtKB/TrEMBL;Acc:A0A178UIX4]	2.0668	0.0218185
AT2G15042	Leucine-rich repeat (LRR) family protein [Source:TAIR;Acc:AT2G15042]	2.0629	0.0124312
AT3G51850	CPK13 [Source:UniProtKB/TrEMBL;Acc:A0A178VEY4]	2.0608	0.0169181
AT5G57580	Calmodulin-binding protein 60 B [Source:UniProtKB/Swiss-Prot;Acc:Q9FKL6]	2.0572	0.00532155
AT2G45540	BEACH domain-containing protein C2 [Source:UniProtKB/Swiss-Prot;Acc:F4IG73]	2.0537	0.0288498
AT1G04120	MRP5 [Source:UniProtKB/TrEMBL;Acc:A0A178WGC2]	2.0458	0.00768485
AT4G13640	Homeodomain-like superfamily protein [Source:TAIR;Acc:AT4G13640]	2.0424	0.0110015
AT3G53180	Nodulin/glutamine synthase-like protein [Source:UniProtKB/TrEMBL;Acc:F4J9A0]	2.0394	0.0405012
AT2G37130	Peroxidase 21 [Source:UniProtKB/Swiss-Prot;Acc:Q42580]	2.0267	0.0406733
AT1G68890	Protein PHYLLO, chloroplastic [Source:UniProtKB/Swiss-Prot;Acc:Q15KI9]	2.0179	0.0451437
AT5G43010	26S proteasome regulatory subunit 10B homolog A [Source:UniProtKB/Swiss-Prot;Acc:Q9SEI3]	2.0163	0.0150646
AT1G21310	Extensin-3 [Source:UniProtKB/Swiss-Prot;Acc:Q9FS16]	2.0159	0.00170961
AT5G26240	Chloride channel protein CLC-d [Source:UniProtKB/Swiss-Prot;Acc:P92943]	2.0151	0.0426439
AT5G62900	Basic-leucine zipper transcription factor K [Source:UniProtKB/TrEMBL;Acc:Q9FM06]	2.015	0.0200612
AT1G03850	Glutaredoxin family protein [Source:TAIR;Acc:AT1G03850]	2.0125	0.0440633
AT2G46230	At2g46230/T3F17.12 [Source:UniProtKB/TrEMBL;Acc:O82346]	2.0111	0.04878
AT5G40780	Lysine histidine transporter 1 [Source:UniProtKB/Swiss-Prot;Acc:Q9FKS8]	2.0074	0.000373568
AT4G33200	myosin, putative [Source:TAIR;Acc:AT4G33200]	2.0043	0.0207387
AT2G47960	At2g47960/T9J23.10 [Source:UniProtKB/TrEMBL;Acc:O82263]	2.0005	0.0380441
AT1G22400	UDP-glycosyltransferase 85A1 [Source:UniProtKB/Swiss-Prot;Acc:Q9SK82]	2.0002	0.0281598
AT1G51610	Metal tolerance protein C4 [Source:UniProtKB/Swiss-Prot;Acc:Q8H1G3]	1.9994	0.0265315
AT1G58030		1.9944	0.0171991
AT1G19250	Probable flavin-containing monooxygenase 1 [Source:UniProtKB/Swiss-Prot;Acc:Q9LMA1]	1.9866	0.0463702
AT2G44065	Expressed protein [Source:UniProtKB/TrEMBL;Acc:Q8VZU4]	1.9865	0.0126604
AT1G43910	AAA-ATPase At1g43910 [Source:UniProtKB/Swiss-Prot;Acc:Q9LP11]	1.9837	0.0488358
AT5G39030	Probable receptor-like protein kinase At5g39030 [Source:UniProtKB/Swiss-Prot;Acc:Q9FID5]	1.9818	0.0195649
AT1G19020	CDP-diacylglycerol-glycerol-3-phosphate 3-phosphatidyltransferase [Source:UniProtKB/TrEMBL;Acc:Q8VYY6]	1.9758	0.0178403
AT5G05950	At5g05950 [Source:UniProtKB/TrEMBL;Acc:Q9FI91]	1.973	0.0491056
AT3G22600	AT3g22600/F16J14_17 [Source:UniProtKB/TrEMBL;Acc:Q9LJ86]	1.9707	0.0165555
AT3G47480	Probable calcium-binding protein CML47 [Source:UniProtKB/Swiss-Prot;Acc:Q9SN89]	1.9704	0.000677358
AT1G51710	Ubiquitin carboxyl-terminal hydrolase 6 [Source:UniProtKB/Swiss-Prot;Acc:Q949Y0]	1.9698	0.0108543
AT1G18800	NRP2 [Source:UniProtKB/TrEMBL;Acc:A0A178W8U0]	1.9672	0.0281718
AT5G51300	Splicing factor-like protein 1 [Source:UniProtKB/Swiss-Prot;Acc:Q9LU44]	1.9569	0.0468326
AT5G66320	GATA transcription factor 5 [Source:UniProtKB/Swiss-Prot;Acc:Q9FH57]	1.9452	0.0241255
AT3G15536	#N/A	1.9359	0.019463
AT2G32680	Receptor like protein 23 [Source:UniProtKB/Swiss-Prot;Acc:O48849]	1.9318	0.00223449
AT3G52430	Lipase-like PAD4 [Source:UniProtKB/Swiss-Prot;Acc:Q9S745]	1.9314	0.00336335
AT5G58100	unknown protein; INVOLVED IN: pollen exine formation; EXPRESSED IN: 19 plant structures; EXPRESSED DURING: 8 growth stages; BEST Arabidopsis thaliana protein match is: unknown protein (TAIR:AT3G28720.1); Has 35333 Blast hits to 34131 proteins in 244 /.../ies: Archae - 798; Bacteria - 22429; Metazoa - 974; Fungi - 991; Plants - 531; Viruses - 0; Other Eukaryotes - 9610 (source: NCBI BLink). [Sourc…	1.9243	0.0247388
AT4G16240	Glycine-rich protein homolog [Source:UniProtKB/TrEMBL;Acc:O23471]	1.9238	0.022394
AT3G13950	AT3G13950 protein [Source:UniProtKB/TrEMBL;Acc:B9DG91]	1.9233	0.0388187
AT5G07440		1.9228	0.0424774
AT5G45750	RABA1c [Source:UniProtKB/TrEMBL;Acc:A0A178UDB2]	1.92	0.0221847
AT2G17130	Isocitrate dehydrogenase [NAD] regulatory subunit 2, mitochondrial [Source:UniProtKB/Swiss-Prot;Acc:P93032]	1.9182	0.00817102
AT4G31800	WRKY like transcription factor [Source:UniProtKB/TrEMBL;Acc:Q0WTZ3]	1.9018	0.0247352
AT3G02230	RGP1 [Source:UniProtKB/TrEMBL;Acc:A0A178VK37]	1.8979	0.0291505
AT5G66060	Probable prolyl 4-hydroxylase 10 [Source:UniProtKB/Swiss-Prot;Acc:F4JZ24]	1.8976	0.0352175
AT1G17720	Serine/threonine-protein phosphatase 2A 55 kDa regulatory subunit B [Source:UniProtKB/TrEMBL;Acc:Q0WW19]	1.8963	0.0126249
AT5G65210	Transcription factor TGA1 [Source:UniProtKB/Swiss-Prot;Acc:Q39237]	1.8957	0.0123965
AT2G21300	Kinesin-like protein KIN-7E [Source:UniProtKB/Swiss-Prot;Acc:F4IGL2]	1.8956	0.0264243
AT3G45770	Enoyl-[acyl-carrier-protein] reductase, mitochondrial [Source:UniProtKB/Swiss-Prot;Acc:Q8LCU7]	1.8945	0.0045834
AT1G02930	Glutathione S-transferase F6 [Source:UniProtKB/Swiss-Prot;Acc:P42760]	1.8881	0.00362324
AT3G18440	Aluminum-activated malate transporter 9 [Source:UniProtKB/Swiss-Prot;Acc:Q9LS46]	1.8853	0.0378341
AT4G14800	Proteasome subunit beta type [Source:UniProtKB/TrEMBL;Acc:F4JIF9]	1.8849	0.00284932
AT5G35370	G-type lectin S-receptor-like serine/threonine-protein kinase At5g35370 [Source:UniProtKB/Swiss-Prot;Acc:O65238]	1.8803	0.0265304
AT3G47420	Putative glycerol-3-phosphate transporter 1 [Source:UniProtKB/Swiss-Prot;Acc:Q9C5L3]	1.8603	0.0483452
AT1G14360	UDP-galactose/UDP-glucose transporter 3 [Source:UniProtKB/Swiss-Prot;Acc:Q9M9S6]	1.8592	0.00288842
AT4G14430	PEC12 [Source:UniProtKB/TrEMBL;Acc:A0A178UV55]	1.8553	0.000872051
AT1G25220	Anthranilate synthase beta subunit 1 [Source:UniProtKB/TrEMBL;Acc:F4IAW5]	1.8501	0.0121506
AT2G18690	Expressed protein [Source:UniProtKB/TrEMBL;Acc:Q9ZV49]	1.8465	0.00897771
AT4G14365	Putative E3 ubiquitin-protein ligase XBAT34 [Source:UniProtKB/Swiss-Prot;Acc:Q9FPH0]	1.845	0.0220314
AT1G15880	Golgi SNAP receptor complex member 1-1 [Source:UniProtKB/Swiss-Prot;Acc:Q9LMP7]	1.8327	0.0386377
AT3G16940	calmodulin binding;transcription regulators [Source:TAIR;Acc:AT3G16940]	1.8282	0.0214511
AT4G18010	Type I inositol polyphosphate 5-phosphatase 2 [Source:UniProtKB/Swiss-Prot;Acc:Q9FUR2]	1.8138	0.0450861
AT5G07830	Heparanase-like protein 1 [Source:UniProtKB/Swiss-Prot;Acc:Q9FF10]	1.8134	0.0410699
AT5G67300	MYBR1 [Source:UniProtKB/TrEMBL;Acc:A0A178UQ74]	1.8129	0.0162241
AT5G62070	IQD23 [Source:UniProtKB/TrEMBL;Acc:A0A178UJA3]	1.8127	0.0223722
AT3G14990	Protein DJ-1 homolog A [Source:UniProtKB/Swiss-Prot;Acc:Q9FPF0]	1.8067	0.0257381
AT1G09560	Germin-like protein subfamily 2 member 1 [Source:UniProtKB/Swiss-Prot;Acc:P94014]	1.8044	0.00495875
AT1G03950	Vacuolar protein sorting-associated protein 2 homolog 3 [Source:UniProtKB/Swiss-Prot;Acc:Q941D5]	1.8013	0.014092
AT2G23420	Nicotinate phosphoribosyltransferase 2 [Source:UniProtKB/Swiss-Prot;Acc:Q84WV8]	1.8002	0.0452033
AT4G33670	L-galactose dehydrogenase [Source:UniProtKB/Swiss-Prot;Acc:O81884]	1.7964	0.0162826
AT1G26830	CUL3A [Source:UniProtKB/TrEMBL;Acc:A0A178WM88]	1.7923	0.026814
AT5G42240	Serine carboxypeptidase-like 42 [Source:UniProtKB/Swiss-Prot;Acc:Q9FH05]	1.7826	0.0257394
AT3G28920	Zinc-finger homeodomain protein 9 [Source:UniProtKB/Swiss-Prot;Acc:Q9LHF0]	1.7791	0.00362785
AT3G26170	Putative cytochrome P450 [Source:UniProtKB/TrEMBL;Acc:Q541W8]	1.7684	0.0230174
AT4G11890	Protein kinase superfamily protein [Source:UniProtKB/TrEMBL;Acc:F4JPT7]	1.765	0.0125856
AT3G08760	ATSIK [Source:UniProtKB/TrEMBL;Acc:A0A384KX76]	1.7616	0.0317564
AT1G52200	Protein PLANT CADMIUM RESISTANCE 8 [Source:UniProtKB/Swiss-Prot;Acc:Q9M815]	1.7558	0.0336421
AT5G43190	F-box/kelch-repeat protein At5g43190 [Source:UniProtKB/Swiss-Prot;Acc:Q9FHS6]	1.7499	0.0409425
AT4G36648	#N/A	1.7495	0.0135092
AT1G01960	Brefeldin A-inhibited guanine nucleotide-exchange protein 3 [Source:UniProtKB/Swiss-Prot;Acc:Q9LPC5]	1.7456	0.0134602
AT4G21180	DnaJ protein ERDJ2B [Source:UniProtKB/Swiss-Prot;Acc:F4JIN3]	1.7403	0.0461734
AT5G46390	Carboxyl-terminal-processing peptidase 1, chloroplastic [Source:UniProtKB/Swiss-Prot;Acc:F4KHG6]	1.7367	0.0307712
AT3G47810	Vacuolar protein sorting-associated protein 29 [Source:UniProtKB/TrEMBL;Acc:A0A178V791]	1.7365	0.00355754
AT1G20630		1.7351	0.0366725
AT2G03510	Expressed protein [Source:UniProtKB/TrEMBL;Acc:Q9ZQ87]	1.732	0.0303067
AT1G65040	ERAD-associated E3 ubiquitin-protein ligase HRD1B [Source:UniProtKB/Swiss-Prot;Acc:Q6NPT7]	1.7221	0.0054579
AT2G14170	Methylmalonate-semialdehyde dehydrogenase [acylating], mitochondrial [Source:UniProtKB/Swiss-Prot;Acc:Q0WM29]	1.7191	0.0496872
AT3G52400	Syntaxin-122 [Source:UniProtKB/Swiss-Prot;Acc:Q9SVC2]	1.717	0.0127728
AT3G18290	Zinc finger protein BRUTUS [Source:UniProtKB/Swiss-Prot;Acc:Q8LPQ5]	1.7146	0.028917
AT3G10300	Calcium-binding EF-hand family protein [Source:UniProtKB/TrEMBL;Acc:A0A1I9LRS6]	1.7074	0.00696085
AT3G59310	Solute carrier family 35 protein (DUF914) [Source:UniProtKB/TrEMBL;Acc:F4J890]	1.7058	0.0304779
AT5G61210	SNP33 [Source:UniProtKB/TrEMBL;Acc:A0A178UGR9]	1.7058	0.0229956
AT3G57240	Probable glucan endo-1,3-beta-glucosidase BG3 [Source:UniProtKB/Swiss-Prot;Acc:F4J270]	1.6995	0.00958322
AT3G26210	Cytochrome P450 71B23 [Source:UniProtKB/Swiss-Prot;Acc:Q9LTM0]	1.6982	0.0435214
AT1G14685	BPC2 [Source:UniProtKB/TrEMBL;Acc:A0A178W364]	1.687	0.0371832
AT1G14880	Protein PLANT CADMIUM RESISTANCE 1 [Source:UniProtKB/Swiss-Prot;Acc:Q9LQU2]	1.6841	8.34483e-05
AT1G73805	Protein SAR DEFICIENT 1 [Source:UniProtKB/Swiss-Prot;Acc:Q9C9T2]	1.6827	0.0129343
AT3G05500	REF/SRPP-like protein At3g05500 [Source:UniProtKB/Swiss-Prot;Acc:Q9MA63]	1.6722	0.0240548
AT1G35230	Classical arabinogalactan protein 5 [Source:UniProtKB/Swiss-Prot;Acc:Q8LCE4]	1.6676	0.0269571
AT5G10380	E3 ubiquitin-protein ligase RING1 [Source:UniProtKB/Swiss-Prot;Acc:Q9LX93]	1.6612	0.00016118
AT3G28540	AAA-ATPase At3g28540 [Source:UniProtKB/Swiss-Prot;Acc:Q9LH82]	1.6533	0.00100033
AT1G71220	UDP-glucose:glycoprotein glucosyltransferases;transferases, transferring hexosyl groups;transferases, transferring glycosyl groups [Source:TAIR;Acc:AT1G71220]	1.6526	0.0472864
AT5G44568	Transmembrane protein [Source:UniProtKB/TrEMBL;Acc:Q570K8]	1.6513	0.00292211
AT1G52980	Nuclear/nucleolar GTPase 2 [Source:UniProtKB/Swiss-Prot;Acc:Q9C923]	1.648	0.0314935
AT2G40140	Zinc finger CCCH domain-containing protein 29 [Source:UniProtKB/Swiss-Prot;Acc:Q9XEE6]	1.6453	0.0357894
AT1G06530	Peroxisomal and mitochondrial division factor 2 [Source:UniProtKB/Swiss-Prot;Acc:Q9SHJ6]	1.6407	0.0268817
AT4G29160	Vacuolar protein sorting-associated protein 32 homolog 2 [Source:UniProtKB/Swiss-Prot;Acc:Q9SZE4]	1.6407	0.00593041
AT1G51160	At1g51160 [Source:UniProtKB/TrEMBL;Acc:Q9SYB8]	1.6399	0.0427016
AT1G15130	Vacuolar-sorting protein BRO1 [Source:UniProtKB/Swiss-Prot;Acc:F4HXZ1]	1.6373	0.0165561
AT3G07670	Putative ribulose-1,5-bisphosphate carboxylase/oxygenase small subunit N-methyltransferase I [Source:UniProtKB/TrEMBL;Acc:Q9S7D2]	1.6341	0.0328377
AT1G54270	eIF4A-2 [Source:UniProtKB/TrEMBL;Acc:A0A178W4U1]	1.6338	0.0264281
AT4G36870	BEL1-like homeodomain protein 2 [Source:UniProtKB/Swiss-Prot;Acc:Q9SW80]	1.6337	0.0428888
AT1G05180	NEDD8-activating enzyme E1 regulatory subunit [Source:UniProtKB/TrEMBL;Acc:A0A178WFT2]	1.632	0.0403967
AT3G49120	Peroxidase 34 [Source:UniProtKB/Swiss-Prot;Acc:Q9SMU8]	1.6281	0.00734197
AT5G42940	Probable E3 ubiquitin-protein ligase RHG1A [Source:UniProtKB/Swiss-Prot;Acc:Q9FMM4]	1.6265	0.0420693
AT5G06360	Ribosomal protein S8e family protein [Source:UniProtKB/TrEMBL;Acc:Q9FNH2]	1.6163	0.0309215
AT3G60690	AT3g60690/T4C21_100 [Source:UniProtKB/TrEMBL;Acc:Q9LZZ4]	1.6091	0.00182999
AT5G52310	Low-temperature-induced 78 kDa protein [Source:UniProtKB/Swiss-Prot;Acc:Q06738]	1.6068	0.0104657
AT1G02920	Glutathione S-transferase F7 [Source:UniProtKB/Swiss-Prot;Acc:Q9SRY5]	1.6055	0.00797531
AT4G16860	Disease resistance protein RPP4 [Source:UniProtKB/Swiss-Prot;Acc:F4JNA9]	1.6023	0.00288818
AT5G11560	Catalytics [Source:UniProtKB/TrEMBL;Acc:F4JXW9]	1.5967	0.0315259
AT4G17640	Casein kinase II subunit beta-2 [Source:UniProtKB/Swiss-Prot;Acc:P40229]	1.5898	0.0448027
AT2G26440	Probable pectinesterase/pectinesterase inhibitor 12 [Source:UniProtKB/Swiss-Prot;Acc:O48711]	1.5851	0.0100749
AT5G39760	Zinc-finger homeodomain protein 10 [Source:UniProtKB/Swiss-Prot;Acc:Q9FIW9]	1.5846	0.0302702
AT3G08650	Putative zinc transporter At3g08650 [Source:UniProtKB/Swiss-Prot;Acc:Q9C9Z1]	1.5826	0.031245
AT5G48380	Probably inactive leucine-rich repeat receptor-like protein kinase At5g48380 [Source:UniProtKB/Swiss-Prot;Acc:Q9ASS4]	1.5741	0.00968476
AT2G39990	Eukaryotic translation initiation factor 3 subunit F [Source:UniProtKB/Swiss-Prot;Acc:O04202]	1.5741	0.0369519
AT5G10760	Aspartyl protease AED1 [Source:UniProtKB/Swiss-Prot;Acc:Q9LEW3]	1.5599	9.33144e-05
AT5G66250	Kinectin-like protein [Source:UniProtKB/TrEMBL;Acc:F4JZ59]	1.5593	0.043669
AT3G62560	Putative Sar1 GTP binding protein [Source:UniProtKB/TrEMBL;Acc:Q8VYP7]	1.5574	0.00640029
AT5G51820	Phosphoglucomutase, chloroplastic [Source:UniProtKB/Swiss-Prot;Acc:Q9SCY0]	1.5512	0.0183051
AT1G18210	Probable calcium-binding protein CML27 [Source:UniProtKB/Swiss-Prot;Acc:Q9LE22]	1.5498	0.0453262
AT3G23280	Putative E3 ubiquitin-protein ligase XBAT35 [Source:UniProtKB/Swiss-Prot;Acc:Q4FE47]	1.548	0.00484985
AT1G13470	Protein of unknown function (DUF1262) [Source:TAIR;Acc:AT1G13470]	1.5475	0.00626901
AT5G08170	Agmatine deiminase [Source:UniProtKB/Swiss-Prot;Acc:Q8GWW7]	1.5369	0.0421202
AT1G53570	Mitogen-activated protein kinase kinase kinase 3 [Source:UniProtKB/Swiss-Prot;Acc:F4HRJ4]	1.5366	0.0234278
AT1G18740	At1g18740/F6A14_15 [Source:UniProtKB/TrEMBL;Acc:Q9M9U5]	1.5332	0.0336766
AT3G57260	Beta-1,3-glucanase 2 [Source:UniProtKB/TrEMBL;Acc:A0A1I9LMG6]	1.5316	0.00210574
AT1G43190	Polypyrimidine tract-binding protein homolog 3 [Source:UniProtKB/Swiss-Prot;Acc:Q6ICX4]	1.5248	0.0113164
AT4G04320	Malonyl-CoA decarboxylase family protein [Source:UniProtKB/TrEMBL;Acc:Q7Y1Z8]	1.5226	0.033464
AT1G76960	F22K20.6 protein [Source:UniProtKB/TrEMBL;Acc:O49282]	1.513	0.000209067
AT5G13020	EML3 [Source:UniProtKB/TrEMBL;Acc:A0A178UIH0]	1.4948	0.0384988
AT3G05200	E3 ubiquitin-protein ligase ATL6 [Source:UniProtKB/Swiss-Prot;Acc:Q8RXX9]	1.4932	0.0419204
AT4G27450	AT4g27450/F27G19_50 [Source:UniProtKB/TrEMBL;Acc:Q93V62]	1.4919	0.0498294
AT2G26560	Patatin-like protein 2 [Source:UniProtKB/Swiss-Prot;Acc:O48723]	1.4702	0.0417389
AT2G21660	Glycine-rich RNA-binding protein 7 [Source:UniProtKB/Swiss-Prot;Acc:Q03250]	1.4588	0.0354177
AT3G13810	indeterminate(ID)-domain 11 [Source:TAIR;Acc:AT3G13810]	1.4552	0.0353812
AT4G38630	RPN10 [Source:UniProtKB/TrEMBL;Acc:A0A178V4I4]	1.4485	0.011852
AT4G12720	MutT/nudix family protein [Source:UniProtKB/TrEMBL;Acc:F4JRE7]	1.4435	0.0447575
AT5G18310	AT5G18310 protein [Source:UniProtKB/TrEMBL;Acc:B9DGJ0]	1.4404	0.0485503
AT1G56340	Calreticulin-1 [Source:UniProtKB/Swiss-Prot;Acc:O04151]	1.4186	0.00274048
AT4G01610	Cathepsin B-like protease 3 [Source:UniProtKB/Swiss-Prot;Acc:Q94K85]	1.4132	0.00873805
AT4G29040	RPT2a [Source:UniProtKB/TrEMBL;Acc:A0A178V3V3]	1.4084	0.00707482
AT5G13710	Cycloartenol-C-24-methyltransferase [Source:UniProtKB/Swiss-Prot;Acc:Q9LM02]	1.3876	0.0473404
AT2G45170	Autophagy-related protein 8e [Source:UniProtKB/Swiss-Prot;Acc:Q8S926]	1.3777	0.042421
AT1G27770		1.3774	0.016469
AT1G71980	Receptor homology region, transmembrane domain- and RING domain-containing protein 2 [Source:UniProtKB/Swiss-Prot;Acc:Q8VZ14]	1.3725	0.0394537
AT5G59780	Transcription factor MYB59 [Source:UniProtKB/Swiss-Prot;Acc:Q4JL84]	1.3714	0.0222296
AT5G06320	NHL3 [Source:UniProtKB/TrEMBL;Acc:A0A178UB58]	1.3682	0.0149655
AT2G17040	NAC domain containing protein 36 [Source:UniProtKB/TrEMBL;Acc:F4IME8]	1.3681	0.0477467
AT2G41100	Calmodulin-like protein 12 [Source:UniProtKB/Swiss-Prot;Acc:P25071]	1.3551	0.004769
AT3G15000	Multiple organellar RNA editing factor 8, chloroplastic/mitochondrial [Source:UniProtKB/Swiss-Prot;Acc:Q9LKA5]	1.3464	0.0334439
AT1G13260	AP2/ERF and B3 domain-containing transcription factor RAV1 [Source:UniProtKB/Swiss-Prot;Acc:Q9ZWM9]	1.3427	0.0267371
AT5G38470	Ubiquitin receptor RAD23d [Source:UniProtKB/Swiss-Prot;Acc:Q84L30]	1.3421	0.0206533
AT4G24520	NADPH--cytochrome P450 reductase [Source:UniProtKB/TrEMBL;Acc:A0A178UWR2]	1.3412	0.0354649
AT5G26340	STP13 [Source:UniProtKB/TrEMBL;Acc:A0A178UHA7]	1.313	0.0216474
AT2G46600	Calcium-binding protein KIC [Source:UniProtKB/Swiss-Prot;Acc:Q9ZPX9]	1.303	0.00597098
AT4G18930	Cyclic phosphodiesterase [Source:UniProtKB/Swiss-Prot;Acc:O04147]	1.2931	0.0308657
AT5G42050	DCD (Development and Cell Death) domain protein [Source:UniProtKB/TrEMBL;Acc:Q8RXN8]	1.2884	0.0121108
AT2G44290	Protein YLS3 [Source:UniProtKB/Swiss-Prot;Acc:O64864]	1.2773	0.0196938
AT3G01290	HIR2 [Source:UniProtKB/TrEMBL;Acc:A0A178V7M0]	1.2709	0.0378484
AT3G62600	DnaJ protein ERDJ3B [Source:UniProtKB/Swiss-Prot;Acc:Q9LZK5]	1.2681	0.014947
AT1G20620		1.2593	0.0484818
AT5G20090	Mitochondrial pyruvate carrier [Source:UniProtKB/TrEMBL;Acc:A0A178UR79]	1.2581	0.0318125
AT1G50010		1.2448	0.0352624
AT2G39780	Ribonuclease 2 [Source:UniProtKB/Swiss-Prot;Acc:P42814]	1.2431	0.0430148
AT1G48920	Nucleolin 1 [Source:UniProtKB/Swiss-Prot;Acc:Q9FVQ1]	1.2322	0.0170775
AT4G23470	PLAC8 family protein [Source:UniProtKB/TrEMBL;Acc:Q8W458]	1.2217	0.0328945
AT1G21750	Protein disulfide isomerase-like 1-1 [Source:UniProtKB/Swiss-Prot;Acc:Q9XI01]	1.221	0.019169
AT2G05380	glycine-rich protein 3 short isoform [Source:TAIR;Acc:AT2G05380]	1.2029	0.00711988
AT2G16660	At2g16660/T24I21.7 [Source:UniProtKB/TrEMBL;Acc:Q9SLF1]	1.1938	0.0386564
AT5G52470	Probable mediator of RNA polymerase II transcription subunit 36b [Source:UniProtKB/Swiss-Prot;Acc:Q9FEF8]	1.1863	0.0311432
AT4G23850	Long chain acyl-CoA synthetase 4 [Source:UniProtKB/Swiss-Prot;Acc:Q9T0A0]	1.186	0.0189743
AT5G42020	Heat shock protein 70 (Hsp 70) family protein [Source:TAIR;Acc:AT5G42020]	1.1524	0.0256443
AT1G08450	Calreticulin-3 [Source:UniProtKB/Swiss-Prot;Acc:O04153]	1.1389	0.0110864
AT4G24190	Endoplasmin homolog [Source:UniProtKB/Swiss-Prot;Acc:Q9STX5]	1.1383	0.0204805
AT4G05070	AT4g05070 protein [Source:UniProtKB/TrEMBL;Acc:Q9S9T1]	1.1274	0.0406835
AT5G67600	Cysteine-rich and transmembrane domain-containing protein WIH1 [Source:UniProtKB/Swiss-Prot;Acc:Q9FJW3]	1.1222	0.046315
AT1G09210	Calreticulin-2 [Source:UniProtKB/Swiss-Prot;Acc:Q38858]	1.1211	0.0175545
AT5G28540	Mediator of RNA polymerase II transcription subunit 37a [Source:UniProtKB/Swiss-Prot;Acc:Q9LKR3]	1.0718	0.0248809
AT1G75950	SKP1-like protein 1A [Source:UniProtKB/Swiss-Prot;Acc:Q39255]	1.0606	0.0425464
AT4G02520	Glutathione S-transferase F2 [Source:UniProtKB/Swiss-Prot;Acc:P46422]	1.0337	0.0331027
AT2G33590	CRL1 [Source:UniProtKB/TrEMBL;Acc:A0A178VRE7]	-1.0001	0.0195489
AT5G16140	Chloroplastic group IIB intron splicing facilitator CRS2-B, chloroplastic [Source:UniProtKB/Swiss-Prot;Acc:Q9LF14]	-1.0005	0.0479839
AT3G47590	Alpha/beta-Hydrolases superfamily protein [Source:UniProtKB/TrEMBL;Acc:Q9SN79]	-1.0014	0.0445163
AT3G15480	AT3g15480/MJK13_14 [Source:UniProtKB/TrEMBL;Acc:Q9LDK1]	-1.0015	0.0352949
AT3G09820		-1.0069	0.00783516
AT5G18800	NADH dehydrogenase [ubiquinone] 1 alpha subcomplex subunit 8-B [Source:UniProtKB/Swiss-Prot;Acc:Q8LGE7]	-1.0125	0.0366028
AT1G18170	Peptidyl-prolyl cis-trans isomerase FKBP17-2, chloroplastic [Source:UniProtKB/Swiss-Prot;Acc:Q9LDY5]	-1.0149	0.00291103
AT5G03760	Glucomannan 4-beta-mannosyltransferase 9 [Source:UniProtKB/Swiss-Prot;Acc:Q9LZR3]	-1.0174	0.00135684
AT1G28540	At1g28540 [Source:UniProtKB/TrEMBL;Acc:Q9SHP5]	-1.02	0.0137544
AT1G06190	Rho termination factor [Source:TAIR;Acc:AT1G06190]	-1.0233	0.0142623
AT5G27660	DEG14 [Source:UniProtKB/TrEMBL;Acc:A0A178UPC0]	-1.0235	0.0135145
AT2G04550	Protein-tyrosine-phosphatase IBR5 [Source:UniProtKB/Swiss-Prot;Acc:Q84JU4]	-1.0242	0.0189539
AT3G01440	Photosynthetic NDH subunit of lumenal location 3, chloroplastic [Source:UniProtKB/Swiss-Prot;Acc:Q9SGH4]	-1.0258	0.0310302
ATCG00220	Photosystem II reaction center protein M [Source:UniProtKB/Swiss-Prot;Acc:P62109]	-1.0282	0.00184843
AT1G07660	Histone H4 [Source:UniProtKB/Swiss-Prot;Acc:P59259]	-1.0301	0.00791821
AT3G56630	Cytochrome P450, family 94, subfamily D, polypeptide 2 [Source:UniProtKB/TrEMBL;Acc:Q9LXX7]	-1.0309	0.024358
AT3G05900	Neurofilament protein-like protein [Source:UniProtKB/TrEMBL;Acc:F4J9K9]	-1.0323	0.030048
AT3G46630	DCL protein (DUF3223) [Source:UniProtKB/TrEMBL;Acc:Q9SNB5]	-1.042	0.0167177
AT5G51010	Rubredoxin-like superfamily protein [Source:UniProtKB/TrEMBL;Acc:Q9FI47]	-1.0436	0.00610163
AT1G72500	LOCATED IN: plasma membrane; EXPRESSED IN: 23 plant structures; EXPRESSED DURING: 13 growth stages; CONTAINS InterPro DOMAIN/s: von Willebrand factor, type A (InterPro:IPR002035); BEST Arabidopsis thaliana protein match is: inter-alpha-trypsin inhib /.../eavy chain-related (TAIR:AT1G19110.1); Has 1407 Blast hits to 1406 proteins in 307 species: Archae - 6; Bacteria - 522; Metazoa - 484; Fungi - 5…	-1.044	0.020028
AT4G37800	Probable xyloglucan endotransglucosylase/hydrolase protein 7 [Source:UniProtKB/Swiss-Prot;Acc:Q8LER3]	-1.0444	0.000344016
AT2G46910		-1.045	0.00818967
AT4G39800		-1.0451	0.00149771
AT4G33580	beta carbonic anhydrase 5 [Source:TAIR;Acc:AT4G33580]	-1.0469	0.00204133
AT3G08690	Ubiquitin-conjugating enzyme E2 11 [Source:UniProtKB/Swiss-Prot;Acc:P35134]	-1.0489	0.0269639
AT2G37860	Protein RETICULATA, chloroplastic [Source:UniProtKB/Swiss-Prot;Acc:B9DFK5]	-1.0496	0.0194007
AT3G53420	PIP2A [Source:UniProtKB/TrEMBL;Acc:A0A178V8P4]	-1.0508	0.000591659
AT5G23120	photosystem II stability/assembly factor, chloroplast (HCF136) [Source:TAIR;Acc:AT5G23120]	-1.0515	0.0174822
AT1G76920	SKP1-interacting partner 15 [Source:UniProtKB/Swiss-Prot;Acc:O49279]	-1.0536	0.0352828
AT3G07090	PPPDE putative thiol peptidase family protein [Source:UniProtKB/TrEMBL;Acc:Q9SFT9]	-1.0559	0.0172143
AT4G34760	Auxin-responsive protein SAUR50 [Source:UniProtKB/Swiss-Prot;Acc:O65695]	-1.0598	0.0203021
AT2G01755	unknown protein; FUNCTIONS IN: molecular_function unknown; INVOLVED IN: biological_process unknown; LOCATED IN: chloroplast; Has 120 Blast hits to 120 proteins in 52 species: Archae - 0; Bacteria - 80; Metazoa - 0; Fungi - 0; Plants - 24; Viruses - /.../er Eukaryotes - 16 (source: NCBI BLink). [Source:TAIR;Acc:AT2G01755]	-1.0598	0.026513
AT1G47395	At1g47390 [Source:UniProtKB/TrEMBL;Acc:Q8GUL3]	-1.0601	0.00254093
AT5G10745	At5g10745 [Source:UniProtKB/TrEMBL;Acc:Q8LCJ2]	-1.062	0.0498735
AT5G24120	RNA polymerase sigma factor sigE, chloroplastic/mitochondrial [Source:UniProtKB/Swiss-Prot;Acc:Q9ZNX9]	-1.0655	0.0491543
AT3G12200	NIMA-related kinase 7 [Source:UniProtKB/TrEMBL;Acc:F4J8P0]	-1.068	0.0405407
AT1G54920	unknown protein; FUNCTIONS IN: molecular_function unknown; INVOLVED IN: biological_process unknown; LOCATED IN: membrane; EXPRESSED IN: 23 plant structures; EXPRESSED DURING: 15 growth stages; Has 35333 Blast hits to 34131 proteins in 2444 species: /.../ - 798; Bacteria - 22429; Metazoa - 974; Fungi - 991; Plants - 531; Viruses - 0; Other Eukaryotes - 9610 (source: NCBI BLink). [Source:TAIR;Acc:A…	-1.0707	0.0298261
AT3G25410	Probable sodium/metabolite cotransporter BASS3, chloroplastic [Source:UniProtKB/Swiss-Prot;Acc:Q8RXE8]	-1.0722	0.0188684
AT1G50732	unknown protein. [Source:TAIR;Acc:AT1G50732]	-1.0746	0.0238256
AT5G56600	Profilin-5 [Source:UniProtKB/Swiss-Prot;Acc:Q9FE63]	-1.0768	0.00618705
AT3G23810	Adenosylhomocysteinase [Source:UniProtKB/TrEMBL;Acc:A0A178VEP9]	-1.0768	0.00143391
AT1G53840		-1.0781	0.0101017
AT3G03250	UTP--glucose-1-phosphate uridylyltransferase [Source:UniProtKB/TrEMBL;Acc:A0A1I9LT02]	-1.0799	0.000836721
AT1G03930	Casein kinase 1-like protein 9 [Source:UniProtKB/Swiss-Prot;Acc:Q9ZWB3]	-1.0816	0.0340751
AT1G73840	Hydroxyproline-rich glycoprotein family protein [Source:UniProtKB/TrEMBL;Acc:Q8VYM7]	-1.0919	0.0274559
AT1G68600	Aluminum-activated malate transporter 5 [Source:UniProtKB/Swiss-Prot;Acc:Q93Z29]	-1.0946	0.0185866
AT1G36310	tRNA (carboxymethyluridine(34)-5-O)-methyltransferase [Source:UniProtKB/Swiss-Prot;Acc:Q94A09]	-1.0949	0.0475744
AT2G04360	unknown protein; FUNCTIONS IN: molecular_function unknown; LOCATED IN: chloroplast; EXPRESSED IN: 22 plant structures; EXPRESSED DURING: 13 growth stages; Has 35333 Blast hits to 34131 proteins in 2444 species: Archae - 798; Bacteria - 22429; Metazo /.../4; Fungi - 991; Plants - 531; Viruses - 0; Other Eukaryotes - 9610 (source: NCBI BLink). [Source:TAIR;Acc:AT2G04360]	-1.0953	0.0227484
AT2G32380	At2g32380 [Source:UniProtKB/TrEMBL;Acc:Q9ZV66]	-1.0974	0.0457372
AT4G32190	Myosin heavy chain-related protein [Source:UniProtKB/TrEMBL;Acc:Q8H1E5]	-1.1016	0.0269572
AT4G28730	GrxC5 [Source:UniProtKB/TrEMBL;Acc:A0A178UXL4]	-1.1045	0.00972047
AT1G54490	XRN4 [Source:UniProtKB/TrEMBL;Acc:A0A384KRW9]	-1.1049	0.0394223
AT5G44520	NagB/RpiA/CoA transferase-like superfamily protein [Source:TAIR;Acc:AT5G44520]	-1.1063	0.0290108
AT4G26520	Aldolase superfamily protein [Source:TAIR;Acc:AT4G26520]	-1.1073	0.0144939
AT5G43850	1,2-dihydroxy-3-keto-5-methylthiopentene dioxygenase 4 [Source:UniProtKB/Swiss-Prot;Acc:Q8H185]	-1.1097	0.00479454
AT3G24500	MBF1C [Source:UniProtKB/TrEMBL;Acc:A0A178VDH9]	-1.1117	0.0343096
AT5G60840	Uncharacterized protein At5g60840/mae1_90 [Source:UniProtKB/TrEMBL;Acc:Q8GXK2]	-1.1122	0.0109922
AT3G25480	Rhodanese-like domain-containing protein 4A, chloroplastic [Source:UniProtKB/Swiss-Prot;Acc:Q56XR7]	-1.1129	0.0178694
AT4G35090		-1.1144	2.13332e-05
AT3G27050	AT3g27050/MOJ10_14 [Source:UniProtKB/TrEMBL;Acc:Q94JV2]	-1.1212	0.0060448
AT2G24765		-1.1274	0.00234209
AT1G18730	Photosynthetic NDH subunit of subcomplex B 4, chloroplastic [Source:UniProtKB/Swiss-Prot;Acc:Q8RXS1]	-1.1294	0.000742993
AT1G19730	Thioredoxin H4 [Source:UniProtKB/Swiss-Prot;Acc:Q39239]	-1.1333	0.0494854
AT3G12400	Ubiquitin-conjugating enzyme/RWD-like protein [Source:UniProtKB/TrEMBL;Acc:A0A1I9LRG3]	-1.1345	0.0124361
AT4G22750	Probable protein S-acyltransferase 13 [Source:UniProtKB/Swiss-Prot;Acc:Q94C49]	-1.1361	0.0497845
AT4G21750	ATML1 [Source:UniProtKB/TrEMBL;Acc:A0A178UZ61]	-1.1388	0.0184514
AT1G75210	Cytosolic IMP-GMP specific 5-nucleotidase, putative [Source:UniProtKB/TrEMBL;Acc:Q8RWN4]	-1.1417	0.0136224
AT4G24972	TPD1 [Source:UniProtKB/TrEMBL;Acc:A0A178V0R1]	-1.1424	0.0389398
AT4G14740	Auxin canalization protein (DUF828) [Source:UniProtKB/TrEMBL;Acc:Q8VY20]	-1.1425	0.0111002
AT1G79430	Myb family transcription factor APL [Source:UniProtKB/Swiss-Prot;Acc:Q9SAK5]	-1.1476	0.0296356
AT3G47070	Thylakoid soluble phosphoprotein [Source:UniProtKB/TrEMBL;Acc:Q9SD66]	-1.1508	0.000299886
AT4G30210	P450 reductase 2 [Source:TAIR;Acc:AT4G30210]	-1.1515	0.0196667
AT1G19960	Putative uncharacterized protein At1g19960 [Source:UniProtKB/TrEMBL;Acc:Q9LNS5]	-1.1555	0.000150559
AT5G24314	plastid transcriptionally active7 [Source:TAIR;Acc:AT5G24314]	-1.1622	0.0102912
AT3G06145	Putative RING zinc finger protein [Source:UniProtKB/TrEMBL;Acc:Q56XV3]	-1.1671	0.0383347
AT1G62250	F19K23.17 protein [Source:UniProtKB/TrEMBL;Acc:O04589]	-1.1674	0.0234948
AT5G20140	SOUL heme-binding family protein [Source:UniProtKB/TrEMBL;Acc:F4K452]	-1.1684	0.00661009
AT1G76680	12-oxophytodienoate reductase 1 [Source:UniProtKB/TrEMBL;Acc:F4I403]	-1.1703	0.00248879
AT4G17070	AT4g17070/dl4565c [Source:UniProtKB/TrEMBL;Acc:Q93ZN3]	-1.1832	0.0395371
AT5G47640	Nuclear transcription factor Y subunit B-2 [Source:UniProtKB/Swiss-Prot;Acc:Q9FGJ3]	-1.1836	0.00814721
AT1G11580	methylesterase PCR A [Source:TAIR;Acc:AT1G11580]	-1.1862	0.00996959
AT3G10940	Phosphoglucan phosphatase LSF2, chloroplastic [Source:UniProtKB/Swiss-Prot;Acc:Q9SRK5]	-1.1894	0.00172135
AT1G80030	Molecular chaperone Hsp40/DnaJ family protein [Source:UniProtKB/TrEMBL;Acc:Q0WN54]	-1.1895	0.00408068
AT3G15900	At3g15900 [Source:UniProtKB/TrEMBL;Acc:Q9LSC1]	-1.1958	0.0365785
AT1G26650	Son of sevenless protein [Source:UniProtKB/TrEMBL;Acc:Q9LQY7]	-1.1996	0.0336352
AT5G22580	Stress-response A/B barrel domain-containing protein At5g22580 [Source:UniProtKB/Swiss-Prot;Acc:Q9FK81]	-1.2011	8.28564e-05
AT5G15310	MYB16 [Source:UniProtKB/TrEMBL;Acc:A0A178UJ10]	-1.2035	0.0378013
AT4G29830	WD repeat-containing protein VIP3 [Source:UniProtKB/Swiss-Prot;Acc:Q9SZQ5]	-1.2066	0.0166506
AT4G31780	monogalactosyl diacylglycerol synthase 1 [Source:TAIR;Acc:AT4G31780]	-1.2072	0.0240819
AT5G42130	Protein MITOFERRINLIKE 1, chloroplastic [Source:UniProtKB/Swiss-Prot;Acc:Q9FHX2]	-1.2078	0.0332968
AT5G04230	Phenylalanine ammonia-lyase [Source:UniProtKB/TrEMBL;Acc:F4JW69]	-1.2096	0.0282207
AT1G60600	2-carboxy-1,4-naphthoquinone phytyltransferase, chloroplastic [Source:UniProtKB/Swiss-Prot;Acc:Q0WUA3]	-1.2145	0.0454126
AT3G02450	Probable inactive ATP-dependent zinc metalloprotease FTSHI 3, chloroplastic [Source:UniProtKB/Swiss-Prot;Acc:Q9M895]	-1.2161	0.0192768
AT1G15060	Alpha/beta hydrolase family protein [Source:UniProtKB/TrEMBL;Acc:Q8RX69]	-1.2201	0.0243408
AT1G12820	Protein AUXIN SIGNALING F-BOX 3 [Source:UniProtKB/Swiss-Prot;Acc:Q9LPW7]	-1.2247	0.00469664
AT4G26840	Small ubiquitin-related modifier 1 [Source:UniProtKB/Swiss-Prot;Acc:P55852]	-1.2271	0.00934033
AT4G02740	F-box/RNI-like superfamily protein [Source:TAIR;Acc:AT4G02740]	-1.2291	0.00868541
AT4G14360	Probable methyltransferase PMT3 [Source:UniProtKB/Swiss-Prot;Acc:Q93YV7]	-1.2326	0.0103223
AT5G55640	At5g55640 [Source:UniProtKB/TrEMBL;Acc:Q9FM74]	-1.2349	0.00887051
AT1G29950	Transcription factor bHLH144 [Source:UniProtKB/Swiss-Prot;Acc:Q9ASX9]	-1.236	0.00986499
AT4G11160	At4g11160 [Source:UniProtKB/TrEMBL;Acc:Q67ZW2]	-1.2392	0.0481842
AT3G06350	Bifunctional 3-dehydroquinate dehydratase/shikimate dehydrogenase, chloroplastic [Source:UniProtKB/Swiss-Prot;Acc:Q9SQT8]	-1.2401	0.0150253
AT4G00165	Putative lipid-binding protein At4g00165 [Source:UniProtKB/Swiss-Prot;Acc:Q8RW93]	-1.243	0.0101383
ATMG01390	#N/A	-1.2457	0.029581
AT5G46490	Disease resistance protein (TIR-NBS-LRR class) family [Source:UniProtKB/TrEMBL;Acc:Q9FHF6]	-1.2459	0.00848786
AT2G29310	Tropinone reductase homolog At2g29310 [Source:UniProtKB/Swiss-Prot;Acc:Q9ZW14]	-1.2465	0.00755852
AT1G78550	2-oxoglutarate (2OG) and Fe(II)-dependent oxygenase superfamily protein [Source:UniProtKB/TrEMBL;Acc:Q9SYM7]	-1.2478	0.0382154
AT3G61600	BTB/POZ domain-containing protein POB1 [Source:UniProtKB/Swiss-Prot;Acc:Q9FPW6]	-1.2508	0.0140242
AT1G73940	At1g73940/F2P9_19 [Source:UniProtKB/TrEMBL;Acc:Q9C9B5]	-1.2545	0.021731
AT2G43850	Integrin-linked protein kinase 1 [Source:UniProtKB/Swiss-Prot;Acc:F4IS56]	-1.2566	0.0180471
AT1G27435	Uncharacterized protein At1g27435/F17L21.30 [Source:UniProtKB/TrEMBL;Acc:Q94F28]	-1.2629	0.00581768
AT3G12560	Telomere repeat-binding protein 3 [Source:UniProtKB/Swiss-Prot;Acc:Q9C7B1]	-1.2672	0.0127124
AT4G36360	Beta-galactosidase 3 [Source:UniProtKB/Swiss-Prot;Acc:Q9SCV9]	-1.273	0.00753736
AT5G05850	Plant intracellular Ras-group-related LRR protein 1 [Source:UniProtKB/Swiss-Prot;Acc:Q9FFJ3]	-1.2736	0.040147
AT2G02220	Phytosulfokine receptor 1 [Source:UniProtKB/Swiss-Prot;Acc:Q9ZVR7]	-1.2774	0.00389955
AT5G25757	Eukaryotic translation initiation factor 3 subunit L [Source:UniProtKB/TrEMBL;Acc:F4JY76]	-1.2777	0.0467448
AT5G58270	ABC transporter B family member 25, mitochondrial [Source:UniProtKB/Swiss-Prot;Acc:Q9LVM1]	-1.2799	0.0175289
AT5G01810	CBL-interacting serine/threonine-protein kinase 15 [Source:UniProtKB/Swiss-Prot;Acc:P92937]	-1.2827	0.0263872
AT2G19860	Phosphotransferase [Source:UniProtKB/TrEMBL;Acc:A0A178VX81]	-1.2843	0.0291519
AT2G01870	At2g01870 [Source:UniProtKB/TrEMBL;Acc:Q9SIS7]	-1.2849	0.0390628
AT2G38580	Mitochondrial ATP synthase D chain-related protein [Source:UniProtKB/TrEMBL;Acc:Q682E1]	-1.2853	0.0410138
AT5G04990	SUN domain-containing protein 1 [Source:UniProtKB/Swiss-Prot;Acc:Q9FF75]	-1.2877	0.00848659
AT3G05850	MUG7 [Source:UniProtKB/TrEMBL;Acc:A0A384KT86]	-1.2887	0.0173791
AT2G20840	Secretory carrier-associated membrane protein 1 [Source:UniProtKB/Swiss-Prot;Acc:Q9SKT3]	-1.29	0.0239522
AT5G49510	Probable prefoldin subunit 3 [Source:UniProtKB/Swiss-Prot;Acc:P57741]	-1.2907	0.0188985
AT5G02270	Non-intrinsic ABC protein 9 [Source:UniProtKB/TrEMBL;Acc:F4KCB8]	-1.2933	0.0119466
AT3G02380	Zinc finger protein CONSTANS-LIKE 2 [Source:UniProtKB/Swiss-Prot;Acc:Q96502]	-1.2947	0.0391694
AT1G06510	Forkhead-associated domain protein [Source:UniProtKB/TrEMBL;Acc:Q84K72]	-1.2994	0.0350644
AT4G08685	SAH7 [Source:UniProtKB/TrEMBL;Acc:A0A178UVW6]	-1.2995	0.00216066
AT4G24760	Alpha/beta-Hydrolases superfamily protein [Source:UniProtKB/TrEMBL;Acc:Q9SB70]	-1.306	0.0125181
AT5G59050	unknown protein; BEST Arabidopsis thaliana protein match is: unknown protein (TAIR:AT3G54000.1); Has 35333 Blast hits to 34131 proteins in 2444 species: Archae - 798; Bacteria - 22429; Metazoa - 974; Fungi - 991; Plants - 531; Viruses - 0; Other Euk /.../s - 9610 (source: NCBI BLink). [Source:TAIR;Acc:AT5G59050]	-1.3116	0.0323627
AT5G01790	At5g01790 [Source:UniProtKB/TrEMBL;Acc:Q6NNJ2]	-1.3138	0.0399985
AT4G14100	Uncharacterized protein At4g14100 [Source:UniProtKB/Swiss-Prot;Acc:Q67YC9]	-1.3138	0.045709
AT3G06580	Galactokinase [Source:UniProtKB/Swiss-Prot;Acc:Q9SEE5]	-1.315	0.0282367
AT2G46630	Putative extensin [Source:UniProtKB/TrEMBL;Acc:Q9ZNU3]	-1.3153	0.0324837
AT1G78820	EP1-like glycoprotein 1 [Source:UniProtKB/Swiss-Prot;Acc:Q9ZVA1]	-1.3205	0.00753528
AT3G23900	RNA recognition motif (RRM)-containing protein [Source:UniProtKB/TrEMBL;Acc:F4J5A7]	-1.3261	0.0315571
AT2G01410	NHL domain-containing protein [Source:UniProtKB/TrEMBL;Acc:Q9ZNQ5]	-1.3266	0.0465792
AT1G18440	Peptidyl-tRNA hydrolase, chloroplastic [Source:UniProtKB/Swiss-Prot;Acc:Q8GW64]	-1.327	0.012038
AT5G67470	Formin-like protein 6 [Source:UniProtKB/Swiss-Prot;Acc:Q9FJX6]	-1.3276	0.0131364
ATCG00590	Cytochrome b6-f complex subunit 6 [Source:UniProtKB/TrEMBL;Acc:A0A1B1W4V9]	-1.3282	0.0404946
AT2G40100	Chlorophyll a-b binding protein, chloroplastic [Source:UniProtKB/TrEMBL;Acc:A0A178VTY4]	-1.3318	0.0380969
AT1G10020	At1g10020 [Source:UniProtKB/TrEMBL;Acc:O80593]	-1.3376	0.0177466
AT1G63120	RHOMBOID-like protein 2 [Source:UniProtKB/Swiss-Prot;Acc:Q9CAN1]	-1.3393	0.0121631
AT1G51700	Dof zinc finger protein DOF1.7 [Source:UniProtKB/Swiss-Prot;Acc:O82155]	-1.34	0.00798517
AT4G35360	At4g35360/F23E12_80 [Source:UniProtKB/TrEMBL;Acc:Q8W4Q1]	-1.3436	0.0352319
AT2G26590	RPN13 [Source:UniProtKB/TrEMBL;Acc:A0A178VY31]	-1.3436	0.00972932
AT4G37550	Acetamidase/Formamidase family protein [Source:TAIR;Acc:AT4G37550]	-1.3441	0.0305827
AT1G27200	DUF23/GT0 (Fragment) [Source:UniProtKB/TrEMBL;Acc:I1VCA1]	-1.3445	0.0337698
AT3G09580	FAD/NAD(P)-binding oxidoreductase family protein [Source:UniProtKB/TrEMBL;Acc:Q9SF45]	-1.3517	0.0170869
AT1G29440	Auxin-responsive protein SAUR63 [Source:UniProtKB/Swiss-Prot;Acc:F4I1H5]	-1.3537	0.0265203
AT5G20270	Heptahelical transmembrane protein 1 [Source:UniProtKB/Swiss-Prot;Acc:Q93ZH9]	-1.3566	0.0299267
AT2G42280	basic helix-loop-helix (bHLH) DNA-binding superfamily protein [Source:TAIR;Acc:AT2G42280]	-1.3574	0.0271248
AT3G52420	OEP7 [Source:UniProtKB/TrEMBL;Acc:A0A178VGL9]	-1.3674	0.0293578
AT2G27230	LHW [Source:UniProtKB/TrEMBL;Acc:A0A178VXD3]	-1.3719	0.0388532
AT3G01810	EEIG1/EHBP1 protein amino-terminal domain protein [Source:UniProtKB/TrEMBL;Acc:Q9SGJ0]	-1.3739	0.0364004
AT2G26990	COP9 signalosome complex subunit 2 [Source:UniProtKB/Swiss-Prot;Acc:Q8W207]	-1.3774	0.028532
AT2G33330	Cysteine-rich repeat secretory protein 11 [Source:UniProtKB/Swiss-Prot;Acc:O22784]	-1.3779	0.0165324
AT1G14310	F14L17.7 protein [Source:UniProtKB/TrEMBL;Acc:Q9M9T1]	-1.3786	0.00439566
AT5G51720	NEET [Source:UniProtKB/TrEMBL;Acc:A0A178UGQ5]	-1.384	0.00250192
AT4G17270	Putative MO25-like protein At4g17270 [Source:UniProtKB/Swiss-Prot;Acc:Q9M0M4]	-1.3853	0.0255709
AT5G10470	kinesin like protein for actin based chloroplast movement 1 [Source:TAIR;Acc:AT5G10470]	-1.3869	0.000831447
AT3G63110	IPT3 [Source:UniProtKB/TrEMBL;Acc:A0A178V8J2]	-1.3914	0.00943064
AT5G48830	unknown protein; FUNCTIONS IN: molecular_function unknown; INVOLVED IN: biological_process unknown; LOCATED IN: chloroplast; EXPRESSED IN: 22 plant structures; EXPRESSED DURING: 13 growth stages; Has 30201 Blast hits to 17322 proteins in 780 species /.../ae - 12; Bacteria - 1396; Metazoa - 17338; Fungi - 3422; Plants - 5037; Viruses - 0; Other Eukaryotes - 2996 (source: NCBI BLink). [Source:TAIR;…	-1.3949	0.0160733
AT3G60290	2-oxoglutarate (2OG) and Fe(II)-dependent oxygenase superfamily protein [Source:UniProtKB/TrEMBL;Acc:F4JAP7]	-1.3976	0.0219577
AT4G28250	EXPB3 [Source:UniProtKB/TrEMBL;Acc:A0A178USU9]	-1.3978	0.00865504
AT4G25100	Superoxide dismutase [Fe] 1, chloroplastic [Source:UniProtKB/Swiss-Prot;Acc:P21276]	-1.4083	3.59664e-05
AT1G71010	Putative 1-phosphatidylinositol-3-phosphate 5-kinase FAB1C [Source:UniProtKB/Swiss-Prot;Acc:Q9SSJ8]	-1.4084	0.00762788
AT1G76955	At1g76955 [Source:UniProtKB/TrEMBL;Acc:Q0V819]	-1.4097	0.002414
AT2G47180	Galactinol synthase 1 [Source:UniProtKB/Swiss-Prot;Acc:O22893]	-1.4156	0.0320506
AT4G15760	monooxygenase 1 [Source:TAIR;Acc:AT4G15760]	-1.4179	0.00386945
AT5G17050	Glycosyltransferase (Fragment) [Source:UniProtKB/TrEMBL;Acc:W8PUE7]	-1.4207	0.0466135
AT1G18660	Zinc finger (C3HC4-type RING finger) family protein [Source:UniProtKB/TrEMBL;Acc:F4ICB5]	-1.4233	0.0007099
AT3G29290	Pentatricopeptide repeat-containing protein At3g29290 [Source:UniProtKB/Swiss-Prot;Acc:Q84J46]	-1.4249	0.00368019
AT5G15450	Chaperone protein ClpB3, chloroplastic [Source:UniProtKB/Swiss-Prot;Acc:Q9LF37]	-1.4263	0.000224159
AT2G41040	Uncharacterized methyltransferase At2g41040, chloroplastic [Source:UniProtKB/Swiss-Prot;Acc:Q0WPT7]	-1.4268	0.00408514
AT3G11720	Polyketide cyclase/dehydrase and lipid transport superfamily protein [Source:UniProtKB/TrEMBL;Acc:F4J7F3]	-1.4278	0.0334611
AT3G52050	5'-3' exonuclease family protein [Source:UniProtKB/TrEMBL;Acc:A8MQG8]	-1.4298	0.0472314
AT5G45280	Pectin acetylesterase 11 [Source:UniProtKB/Swiss-Prot;Acc:Q9FH82]	-1.4344	0.0187087
AT1G59840	Protein COFACTOR ASSEMBLY OF COMPLEX C SUBUNIT B CCB4, chloroplastic [Source:UniProtKB/Swiss-Prot;Acc:Q6NQK9]	-1.4349	0.00400261
AT1G72790	Hydroxyproline-rich glycoprotein family protein [Source:UniProtKB/TrEMBL;Acc:Q9CAJ1]	-1.4365	0.0124393
AT3G14770	Bidirectional sugar transporter SWEET [Source:UniProtKB/TrEMBL;Acc:A0A178VM79]	-1.4367	0.0102903
AT4G17060		-1.4374	0.0265275
AT4G24440	AT4G24440 protein (Fragment) [Source:UniProtKB/TrEMBL;Acc:Q53YU1]	-1.4389	0.0141603
AT1G68238	Putative uncharacterized protein [Source:UniProtKB/TrEMBL;Acc:Q1G3X3]	-1.4408	0.00876343
AT5G04950	Nicotianamine synthase 1 [Source:UniProtKB/Swiss-Prot;Acc:Q9FF79]	-1.4417	0.0250909
AT2G25620	Probable protein phosphatase 2C 22 [Source:UniProtKB/Swiss-Prot;Acc:Q9SLA1]	-1.4434	0.00704277
AT5G67380	Casein kinase II subunit alpha-1 [Source:UniProtKB/Swiss-Prot;Acc:Q08467]	-1.4453	0.0135894
AT1G72410	COP1-interacting protein-like protein [Source:UniProtKB/TrEMBL;Acc:F4IDB4]	-1.4463	0.0405473
AT4G01460	Transcription factor bHLH57 [Source:UniProtKB/Swiss-Prot;Acc:Q9M128]	-1.4479	0.0348275
AT5G06845	#N/A	-1.45	0.0200682
AT1G33230	TMPIT-like protein [Source:TAIR;Acc:AT1G33230]	-1.4538	0.0200818
ATCG01050	NADH-Ubiquinone/plastoquinone (complex I) protein [Source:TAIR;Acc:ATCG01050]	-1.4588	0.0093225
AT1G49130	B-box type zinc finger protein with CCT domain-containing protein [Source:UniProtKB/TrEMBL;Acc:F4I1N0]	-1.4621	0.0459044
AT1G73440	At1g73440 [Source:UniProtKB/TrEMBL;Acc:Q9FDZ8]	-1.4635	0.0443458
AT5G66580	Uncharacterized protein At5g66580 [Source:UniProtKB/TrEMBL;Acc:Q9FJY2]	-1.4666	0.0479579
AT1G36370	Serine hydroxymethyltransferase 7 [Source:UniProtKB/Swiss-Prot;Acc:Q84WV0]	-1.4666	0.0140223
AT1G10370	Glutathione S-transferase U17 [Source:UniProtKB/Swiss-Prot;Acc:Q9FUS8]	-1.4781	0.00262579
AT3G48590	Nuclear transcription factor Y subunit C-1 [Source:UniProtKB/Swiss-Prot;Acc:Q9SMP0]	-1.4799	0.0379918
AT3G16950		-1.4814	0.0396108
AT5G06710	Homeobox-leucine zipper protein HAT14 [Source:UniProtKB/Swiss-Prot;Acc:P46665]	-1.4913	0.0288099
AT2G40435	Transcription factor SCREAM-like protein [Source:UniProtKB/TrEMBL;Acc:Q8RUZ5]	-1.4929	0.0262383
AT1G42470	Patched family protein [Source:TAIR;Acc:AT1G42470]	-1.4977	0.0405843
AT4G30150	CONTAINS InterPro DOMAIN/s: Nucleolar 27S pre-rRNA processing, Urb2/Npa2 (InterPro:IPR018849); Has 58 Blast hits to 49 proteins in 21 species: Archae - 0; Bacteria - 2; Metazoa - 2; Fungi - 0; Plants - 44; Viruses - 3; Other Eukaryotes - 7 (source: /.../Link). [Source:TAIR;Acc:AT4G30150]	-1.4988	0.0293363
AT5G15850	Zinc finger protein CONSTANS-LIKE 1 [Source:UniProtKB/Swiss-Prot;Acc:O50055]	-1.5023	0.00611807
AT4G35410	AP-1 complex subunit sigma-2 [Source:UniProtKB/Swiss-Prot;Acc:O23685]	-1.5031	0.0166046
AT4G10280	AT4g10280/F24G24_80 [Source:UniProtKB/TrEMBL;Acc:Q9SV93]	-1.51	0.0473838
AT5G49230	Protein DEHYDRATION-INDUCED 19 homolog 7 [Source:UniProtKB/Swiss-Prot;Acc:Q9FJ17]	-1.5146	0.0148474
AT3G52360	Transmembrane protein [Source:UniProtKB/TrEMBL;Acc:Q9FT46]	-1.5158	0.00502958
AT4G07825	At4g07825 [Source:UniProtKB/TrEMBL;Acc:Q8GZ72]	-1.518	0.0235545
AT4G16845	Polycomb group protein VERNALIZATION 2 [Source:UniProtKB/Swiss-Prot;Acc:Q8W5B1]	-1.5182	0.0301115
AT5G64460	Phosphoglycerate mutase-like protein 1 [Source:UniProtKB/Swiss-Prot;Acc:Q9FGF0]	-1.5192	0.00130881
AT4G14385	Histone acetyltransferase subunit NuA4-domain protein [Source:UniProtKB/TrEMBL;Acc:Q93VF4]	-1.5201	0.0309704
AT5G52030	TraB family protein [Source:UniProtKB/TrEMBL;Acc:Q9FJ89]	-1.5206	0.0328926
AT1G15420	WD repeat protein [Source:UniProtKB/TrEMBL;Acc:Q8L403]	-1.5254	0.0432336
AT1G19720	Pentatricopeptide repeat-containing protein At1g19720 [Source:UniProtKB/Swiss-Prot;Acc:Q9FXH1]	-1.5274	0.0128219
AT4G24040	Trehalase [Source:UniProtKB/Swiss-Prot;Acc:Q9SU50]	-1.5333	0.0393146
AT4G24370	Uncharacterized protein At4g24370 [Source:UniProtKB/TrEMBL;Acc:Q9STV7]	-1.5358	0.0327174
AT5G38360	alpha/beta-Hydrolases superfamily protein [Source:TAIR;Acc:AT5G38360]	-1.5373	0.00117268
AT1G54770	Fcf2 pre-rRNA processing protein [Source:UniProtKB/TrEMBL;Acc:Q84K05]	-1.539	0.0176348
AT4G12340	AT4g12340/T4C9_180 [Source:UniProtKB/TrEMBL;Acc:Q9STH7]	-1.5401	0.00011328
AT5G55730	Fasciclin-like arabinogalactan protein 1 [Source:UniProtKB/Swiss-Prot;Acc:Q9FM65]	-1.5487	0.0209761
AT4G27720	AT4g27720/T29A15_210 [Source:UniProtKB/TrEMBL;Acc:Q9C5R0]	-1.5556	0.00526407
AT2G15270	Expressed protein [Source:UniProtKB/TrEMBL;Acc:Q9SHU9]	-1.5591	0.0155343
AT5G53280	Plastid division protein PDV1 [Source:UniProtKB/Swiss-Prot;Acc:Q9FK13]	-1.5637	0.0125915
AT5G66400	RAB18 [Source:UniProtKB/TrEMBL;Acc:A0A178UN24]	-1.5668	0.0106545
AT3G21460	Monothiol glutaredoxin-S10 [Source:UniProtKB/Swiss-Prot;Acc:Q9LIF1]	-1.5678	0.0228774
AT1G76130	Probable alpha-amylase 2 [Source:UniProtKB/Swiss-Prot;Acc:Q8LFG1]	-1.5682	0.00721266
AT5G60160	AT5g60160/f15l12_20 [Source:UniProtKB/TrEMBL;Acc:Q9LST0]	-1.5741	0.00971965
AT4G21100	DNA damage-binding protein 1b [Source:UniProtKB/Swiss-Prot;Acc:O49552]	-1.5743	0.0170745
AT2G01070	Lung seven transmembrane receptor family protein [Source:UniProtKB/TrEMBL;Acc:F4IM73]	-1.5745	0.0138585
AT1G12830	F13K23.8 protein [Source:UniProtKB/TrEMBL;Acc:Q9LPW6]	-1.5755	0.0129572
AT1G72030	Acyl-CoA N-acyltransferases (NAT) superfamily protein [Source:UniProtKB/TrEMBL;Acc:Q9C7G6]	-1.576	0.00358465
AT3G12580	Probable mediator of RNA polymerase II transcription subunit 37c [Source:UniProtKB/Swiss-Prot;Acc:Q9LHA8]	-1.5766	0.00294281
AT3G50520	Phosphoglycerate mutase-like protein 4 [Source:UniProtKB/Swiss-Prot;Acc:Q9SCS3]	-1.5819	0.0407993
AT3G17120	AT3g17120/K14A17_24 [Source:UniProtKB/TrEMBL;Acc:Q9LSN5]	-1.5832	0.00434859
AT3G46130	myb domain protein 48 [Source:TAIR;Acc:AT3G46130]	-1.5936	0.0376613
AT1G01440	At1g01440 [Source:UniProtKB/TrEMBL;Acc:Q6NQ63]	-1.5964	0.00735222
AT5G65460	kinesin like protein for actin based chloroplast movement 2 [Source:TAIR;Acc:AT5G65460]	-1.5979	0.0115895
AT5G03690	Fructose-bisphosphate aldolase 4, cytosolic [Source:UniProtKB/Swiss-Prot;Acc:F4KGQ0]	-1.6003	0.0375681
AT5G48545	HINT3 [Source:UniProtKB/TrEMBL;Acc:A0A178UAY8]	-1.6027	0.0079684
AT4G37432	#N/A	-1.6065	0.00799034
AT5G15740	O-fucosyltransferase 34 [Source:UniProtKB/Swiss-Prot;Acc:Q4V398]	-1.6127	0.032369
AT1G04733	#N/A	-1.6157	0.00133524
AT1G04390	BTB/POZ domain-containing protein At1g04390 [Source:UniProtKB/Swiss-Prot;Acc:P93820]	-1.6197	0.033823
AT5G65730	Xyloglucan endotransglucosylase/hydrolase [Source:UniProtKB/TrEMBL;Acc:Q0WUU2]	-1.6239	7.79277e-06
AT4G12970	EPIDERMAL PATTERNING FACTOR-like protein 9 [Source:UniProtKB/Swiss-Prot;Acc:Q9SV72]	-1.6278	0.0154793
AT2G37640	Expansin [Source:UniProtKB/TrEMBL;Acc:A0A178VPK3]	-1.6341	0.00126295
AT3G47930	GLDH [Source:UniProtKB/TrEMBL;Acc:A0A178VN92]	-1.6342	0.00385668
AT5G40160	Ankyrin repeat domain-containing protein EMB506, chloroplastic [Source:UniProtKB/Swiss-Prot;Acc:Q9SQK3]	-1.6375	0.00211595
AT5G16840	binding partner of acd11 1 [Source:TAIR;Acc:AT5G16840]	-1.6397	0.00587954
AT1G13460	Serine/threonine protein phosphatase 2A 57 kDa regulatory subunit B' theta isoform [Source:UniProtKB/Swiss-Prot;Acc:Q8LF36]	-1.6409	0.00468646
AT1G69523	At1g69520/F10D13_17 [Source:UniProtKB/TrEMBL;Acc:Q941B1]	-1.6411	0.0120205
AT3G13190	WEB family protein (DUF827) [Source:UniProtKB/TrEMBL;Acc:A0A178VAA6]	-1.6477	0.0162409
AT5G52180	Dbj [Source:UniProtKB/TrEMBL;Acc:Q9LTK2]	-1.649	0.0104608
AT2G36950	Heavy metal-associated isoprenylated plant protein 5 [Source:UniProtKB/Swiss-Prot;Acc:Q9SJL2]	-1.6491	0.00276472
AT4G25770	alpha/beta-Hydrolases superfamily protein [Source:TAIR;Acc:AT4G25770]	-1.6492	0.0183683
AT1G04970	Putative BPI/LBP family protein At1g04970 [Source:UniProtKB/Swiss-Prot;Acc:Q9MAU5]	-1.6499	0.00168341
AT4G08170	Inositol-tetrakisphosphate 1-kinase 3 [Source:UniProtKB/Swiss-Prot;Acc:Q9SUG3]	-1.6545	0.0253144
AT3G18600	DEAD-box ATP-dependent RNA helicase 51 [Source:UniProtKB/Swiss-Prot;Acc:Q9LIH9]	-1.6575	0.0489311
AT1G05562	#N/A	-1.6589	0.0451234
AT3G22260	At3g22260 [Source:UniProtKB/TrEMBL;Acc:Q0V869]	-1.6614	0.0384739
AT1G29520	AWPM-19-like family protein [Source:UniProtKB/TrEMBL;Acc:Q9C7P9]	-1.664	0.013632
AT5G18080	Auxin-responsive protein SAUR24 [Source:UniProtKB/Swiss-Prot;Acc:Q9FK62]	-1.6665	0.00301322
AT1G62970	Chaperone DnaJ-domain superfamily protein [Source:UniProtKB/TrEMBL;Acc:Q0WQM3]	-1.6794	0.0458478
AT1G65520	Enoyl-CoA delta isomerase 1, peroxisomal [Source:UniProtKB/Swiss-Prot;Acc:O04469]	-1.6802	0.0114239
AT3G58720	RING/U-box superfamily protein [Source:UniProtKB/TrEMBL;Acc:A0A1I9LN13]	-1.683	0.0456662
AT2G40690	Glycerol-3-phosphate dehydrogenase [NAD(+)] 2, chloroplastic [Source:UniProtKB/Swiss-Prot;Acc:Q949Q0]	-1.6858	0.015875
AT1G26945	Transcription factor PRE6 [Source:UniProtKB/Swiss-Prot;Acc:Q8GW32]	-1.6894	0.00778233
AT3G28760	3-dehydroquinate synthase [Source:UniProtKB/TrEMBL;Acc:B9DHA5]	-1.6906	0.00331502
AT3G14200	Chaperone DnaJ-domain superfamily protein [Source:UniProtKB/TrEMBL;Acc:Q9LJG5]	-1.6959	0.0183837
AT1G71360	Galactose-binding protein [Source:TAIR;Acc:AT1G71360]	-1.6994	0.0309685
AT1G34844	#N/A	-1.7055	0.024775
AT4G24120	YSL1 [Source:UniProtKB/TrEMBL;Acc:A0A178V2Q5]	-1.7062	0.040102
AT3G20430	Phosphorylated adapter RNA export-like protein [Source:UniProtKB/TrEMBL;Acc:Q9LTP9]	-1.7078	0.0312396
AT5G29000	Protein PHR1-LIKE 1 [Source:UniProtKB/Swiss-Prot;Acc:Q8GUN5]	-1.7169	0.0449127
AT5G41140	Myosin heavy chain-related protein [Source:UniProtKB/TrEMBL;Acc:Q9FLL5]	-1.7263	0.00678571
AT1G77420	Alpha/beta-Hydrolases superfamily protein [Source:UniProtKB/TrEMBL;Acc:Q9FVW6]	-1.7272	0.0250533
AT3G08870	Concanavalin A-like lectin protein kinase family protein [Source:UniProtKB/TrEMBL;Acc:A0A1I9LTB8]	-1.7311	0.0109543
AT4G36640	At4g36640 [Source:UniProtKB/TrEMBL;Acc:O23217]	-1.732	0.042702
AT4G28290	At4g28290 [Source:UniProtKB/TrEMBL;Acc:Q9M0H9]	-1.733	0.00282717
AT1G80530	Major facilitator superfamily protein [Source:UniProtKB/TrEMBL;Acc:Q9M8M1]	-1.7335	0.0429866
AT2G20050	Protein phosphatase 2C and cyclic nucleotide-binding/kinase domain-containing protein [Source:UniProtKB/Swiss-Prot;Acc:Q9SL76]	-1.7339	0.00436069
AT3G25220	Peptidyl-prolyl cis-trans isomerase FKBP15-1 [Source:UniProtKB/Swiss-Prot;Acc:Q38935]	-1.7341	0.00388479
AT3G11690	At3g11690 [Source:UniProtKB/TrEMBL;Acc:Q9SRM8]	-1.7441	0.0120474
AT4G31840	Early nodulin-like protein 15 [Source:UniProtKB/TrEMBL;Acc:Q9SZ51]	-1.7447	0.0396121
AT3G56290	Potassium transporter [Source:UniProtKB/TrEMBL;Acc:Q9LYL4]	-1.747	4.98091e-05
AT4G32770	Tocopherol cyclase, chloroplastic [Source:UniProtKB/Swiss-Prot;Acc:Q94FY7]	-1.7525	0.000285848
ATCG00540	Cytochrome f [Source:UniProtKB/Swiss-Prot;Acc:P56771]	-1.757	4.04418e-05
AT4G29510	Protein arginine N-methyltransferase 1.1 [Source:UniProtKB/Swiss-Prot;Acc:Q9SU94]	-1.7575	0.0114716
AT3G04140	Ankyrin repeat family protein [Source:UniProtKB/TrEMBL;Acc:Q9M8X0]	-1.7576	0.00399718
AT1G62830	Lysine-specific histone demethylase 1 homolog 1 [Source:UniProtKB/Swiss-Prot;Acc:Q8VXV7]	-1.7641	0.0489613
AT2G20010	Gls protein (DUF810) [Source:UniProtKB/TrEMBL;Acc:Q9SL80]	-1.7651	0.00799612
AT3G54080	Concanavalin A-like lectin family protein [Source:UniProtKB/TrEMBL;Acc:Q9M395]	-1.7654	0.0170895
ATCG00020	Photosystem II protein D1 [Source:UniProtKB/Swiss-Prot;Acc:P83755]	-1.7672	2.15025e-05
AT4G32800	Ethylene-responsive transcription factor ERF043 [Source:UniProtKB/Swiss-Prot;Acc:Q9M080]	-1.7716	0.0221425
AT1G20460	NADH-ubiquinone oxidoreductase chain [Source:UniProtKB/TrEMBL;Acc:Q8L6Z1]	-1.7746	0.0160206
AT2G13440	Glucose-inhibited division family A protein [Source:UniProtKB/TrEMBL;Acc:Q9SHS2]	-1.777	0.0306292
AT3G53240	Receptor like protein 45 [Source:UniProtKB/TrEMBL;Acc:A0A1I9LLM1]	-1.7819	0.0107775
AT3G23840	Protein ECERIFERUM 26-like [Source:UniProtKB/Swiss-Prot;Acc:Q9LIS1]	-1.7872	0.0136096
AT3G48820	Sialyltransferase-like protein 2 [Source:UniProtKB/Swiss-Prot;Acc:Q8RY00]	-1.7911	0.0201382
AT2G29170	NAD(P)-binding Rossmann-fold superfamily protein [Source:TAIR;Acc:AT2G29170]	-1.7933	0.0119161
AT3G11110	RING-H2 finger protein ATL66 [Source:UniProtKB/Swiss-Prot;Acc:Q9SRM0]	-1.7986	0.0112698
AT1G80350	Katanin p60 ATPase-containing subunit A1 [Source:UniProtKB/TrEMBL;Acc:Q0WR11]	-1.8133	0.0233877
AT2G38630	Transducin/WD40 repeat-like superfamily protein [Source:UniProtKB/TrEMBL;Acc:Q84J57]	-1.8222	0.0415677
AT3G25400	dCTP pyrophosphatase-like protein [Source:UniProtKB/TrEMBL;Acc:Q9LSW0]	-1.8248	0.0470908
AT1G11400		-1.8383	0.0371732
AT3G23010		-1.8401	0.0445609
AT3G13404	unknown protein; FUNCTIONS IN: molecular_function unknown; INVOLVED IN: biological_process unknown; LOCATED IN: cellular_component unknown; Has 0 Blast hits to 0 proteins in 0 species (source: NCBI BLink). [Source:TAIR;Acc:AT3G13404]	-1.8448	0.00934686
AT5G17170	Rubredoxin family protein [Source:UniProtKB/TrEMBL;Acc:Q9FFJ2]	-1.8461	5.0953e-06
AT2G27130	Xylogen-like protein 11 [Source:UniProtKB/Swiss-Prot;Acc:Q9ZVC7]	-1.85	0.00962226
AT1G57590		-1.86	0.000702433
AT1G67750	Probable pectate lyase 5 [Source:UniProtKB/Swiss-Prot;Acc:Q9FXD8]	-1.8614	0.0127149
AT3G57220	At3g57220 [Source:UniProtKB/TrEMBL;Acc:Q9M2M5]	-1.8645	0.0163934
AT2G24220	purine permease 5 [Source:TAIR;Acc:AT2G24220]	-1.8666	0.0427265
AT5G39800	Mitochondrial ribosomal protein L27 [Source:UniProtKB/TrEMBL;Acc:Q8GXS6]	-1.8674	0.0393947
AT3G51990	Serine/threonine-protein kinase-like protein At3g51990 [Source:UniProtKB/Swiss-Prot;Acc:Q9SV05]	-1.868	0.0357586
AT3G21540	Transducin family protein / WD-40 repeat family protein [Source:UniProtKB/TrEMBL;Acc:Q9LVF2]	-1.8702	0.0330349
AT3G11070	Outer membrane OMP85 family protein [Source:UniProtKB/TrEMBL;Acc:Q9SRL6]	-1.8755	0.00751698
AT5G11530	Protein EMBRYONIC FLOWER 1 [Source:UniProtKB/Swiss-Prot;Acc:Q9LYD9]	-1.8788	0.00602644
ATMG00660	Uncharacterized mitochondrial protein AtMg00660 [Source:UniProtKB/Swiss-Prot;Acc:P93318]	-1.8812	0.0428459
AT1G16730	F17F16.6 protein [Source:UniProtKB/TrEMBL;Acc:Q9FWQ7]	-1.892	0.00244791
AT1G29460	SAUR-like auxin-responsive protein family [Source:TAIR;Acc:AT1G29460]	-1.8927	0.0241104
AT4G38280	At4g38290 [Source:UniProtKB/TrEMBL;Acc:Q8L6Z3]	-1.8988	0.00680588
AT2G30350	Structure-specific endonuclease subunit SLX1 homolog [Source:UniProtKB/TrEMBL;Acc:A0A178VUD7]	-1.9018	0.0283982
AT2G33550	Trihelix transcription factor ASR3 [Source:UniProtKB/Swiss-Prot;Acc:Q8VZ20]	-1.9056	0.0265073
AT5G05960	At5g05960 [Source:UniProtKB/TrEMBL;Acc:Q8LBY9]	-1.9088	0.00185622
AT5G46550	Transcription factor GTE12 [Source:UniProtKB/Swiss-Prot;Acc:Q9LS28]	-1.9131	0.0323341
AT5G38140	Nuclear transcription factor Y subunit C-10 [Source:UniProtKB/Swiss-Prot;Acc:Q58CM8]	-1.921	0.00132758
ATCG00550	Photosystem II reaction center protein J [Source:UniProtKB/Swiss-Prot;Acc:P56781]	-1.9246	0.000483233
AT2G46060	Transmembrane protein-like protein [Source:UniProtKB/TrEMBL;Acc:Q8RWX6]	-1.9351	0.0102972
AT1G76185	At1g76185 [Source:UniProtKB/TrEMBL;Acc:Q8LCY3]	-1.9436	0.036137
AT5G40960	At5g40960 [Source:UniProtKB/TrEMBL;Acc:Q9FLN3]	-1.9446	0.0290404
AT3G44990	Xyloglucan endotransglucosylase/hydrolase protein 31 [Source:UniProtKB/Swiss-Prot;Acc:P93046]	-1.9463	5.7462e-05
AT1G06820	Prolycopene isomerase, chloroplastic [Source:UniProtKB/Swiss-Prot;Acc:Q9M9Y8]	-1.9628	0.00348848
AT4G11211	At4g11211 [Source:UniProtKB/TrEMBL;Acc:Q3EA55]	-1.9648	0.00221392
AT2G23340	Ethylene-responsive transcription factor ERF008 [Source:UniProtKB/Swiss-Prot;Acc:O22174]	-1.9748	0.0124207
AT2G06850	Xyloglucan endotransglucosylase/hydrolase protein 4 [Source:UniProtKB/Swiss-Prot;Acc:Q39099]	-1.9779	1.76731e-06
AT3G58670	Plant cysteine oxidase 5 [Source:UniProtKB/Swiss-Prot;Acc:Q9LXT4]	-1.9798	0.0242832
AT1G60230	Radical SAM superfamily protein [Source:UniProtKB/TrEMBL;Acc:Q93XX3]	-1.9823	0.0102061
AT1G29450	Auxin-responsive protein SAUR64 [Source:UniProtKB/Swiss-Prot;Acc:Q0V7Z5]	-2.0079	0.00126229
AT5G43740	Probable disease resistance protein At5g43740 [Source:UniProtKB/Swiss-Prot;Acc:Q9FG90]	-2.0102	0.0390319
ATCG00490	Ribulose bisphosphate carboxylase large chain [Source:UniProtKB/Swiss-Prot;Acc:O03042]	-2.0109	0.00853399
AT2G40820	FUNCTIONS IN: molecular_function unknown; INVOLVED IN: biological_process unknown; LOCATED IN: plasma membrane; EXPRESSED IN: 21 plant structures; EXPRESSED DURING: 13 growth stages; BEST Arabidopsis thaliana protein match is: myosin heavy chain-rel /.../TAIR:AT3G56480.1); Has 203 Blast hits to 195 proteins in 64 species: Archae - 3; Bacteria - 13; Metazoa - 26; Fungi - 15; Plants - 101; Viruses …	-2.0111	0.0213907
AT4G00900	Calcium-transporting ATPase 2, endoplasmic reticulum-type [Source:UniProtKB/Swiss-Prot;Acc:O23087]	-2.0201	0.0433214
AT5G23730	WD repeat-containing protein RUP2 [Source:UniProtKB/Swiss-Prot;Acc:Q9FFA7]	-2.0392	0.0381877
AT5G16480	Tyrosine-protein phosphatase DSP5 [Source:UniProtKB/Swiss-Prot;Acc:Q9FFD7]	-2.0419	0.0397851
AT5G19320	RANGAP2 [Source:UniProtKB/TrEMBL;Acc:A0A178UQD1]	-2.0481	0.00209572
AT4G01220	UDP-D-xylose:L-fucose alpha-1,3-D-xylosyltransferase MGP4 [Source:UniProtKB/Swiss-Prot;Acc:Q9M146]	-2.0491	0.0101518
AT1G23170	Protein of unknown function DUF2359, transmembrane [Source:TAIR;Acc:AT1G23170]	-2.0493	0.04143
AT4G01060	CAPRICE-like MYB3 [Source:TAIR;Acc:AT4G01060]	-2.0517	0.0282552
AT4G18460	D-aminoacyl-tRNA deacylase [Source:UniProtKB/TrEMBL;Acc:Q8VZ75]	-2.0552	0.0329386
AT2G35720	Chaperone protein dnaJ 13 [Source:UniProtKB/Swiss-Prot;Acc:Q39079]	-2.0577	0.0276629
AT1G29510	Auxin-responsive protein SAUR67 [Source:UniProtKB/Swiss-Prot;Acc:F4I1I4]	-2.0589	0.00185196
AT3G46670	Glycosyltransferase (Fragment) [Source:UniProtKB/TrEMBL;Acc:W8PUR9]	-2.0625	0.0313785
AT2G32990	Endoglucanase 11 [Source:UniProtKB/Swiss-Prot;Acc:O48766]	-2.0702	0.0057542
AT4G24590	unknown protein; BEST Arabidopsis thaliana protein match is: unknown protein (TAIR:AT5G49710.3); Has 105 Blast hits to 105 proteins in 26 species: Archae - 0; Bacteria - 0; Metazoa - 8; Fungi - 3; Plants - 85; Viruses - 0; Other Eukaryotes - 9 (sour /.../BI BLink). [Source:TAIR;Acc:AT4G24590]	-2.0781	0.0109219
AT3G27360		-2.0835	0.00197512
AT1G29960	Peptidase S24/S26A/S26B/S26C family protein [Source:UniProtKB/TrEMBL;Acc:Q67XF2]	-2.0948	0.0289069
AT4G14600	Bet1-like protein At4g14600 [Source:UniProtKB/Swiss-Prot;Acc:Q8VXX9]	-2.1015	0.0146969
AT3G24200	Ubiquinone biosynthesis monooxygenase COQ6, mitochondrial [Source:UniProtKB/TrEMBL;Acc:F4J6I6]	-2.1051	0.0202451
AT1G10380	At1g10380/F14N23_32 [Source:UniProtKB/TrEMBL;Acc:Q93ZB0]	-2.1207	0.00875252
AT2G31730	Transcription factor bHLH154 [Source:UniProtKB/Swiss-Prot;Acc:Q7XJU1]	-2.1214	0.0334954
AT1G77660	Histone H3 K4-specific methyltransferase SET7/9 family protein [Source:UniProtKB/TrEMBL;Acc:Q9CAP2]	-2.1254	0.0395441
AT5G64830	AT5g64830/MXK3_5 [Source:UniProtKB/TrEMBL;Acc:Q9LV94]	-2.1321	0.0147957
AT2G32540	Glycosyltransferase (Fragment) [Source:UniProtKB/TrEMBL;Acc:W8Q3D1]	-2.1321	0.000107391
AT4G35290	Glutamate receptor 3.2 [Source:UniProtKB/Swiss-Prot;Acc:Q93YT1]	-2.1416	0.0462469
AT5G10160	(3R)-hydroxymyristoyl-[acyl carrier protein] dehydratase-like protein [Source:UniProtKB/TrEMBL;Acc:Q9LX13]	-2.1497	0.00395841
AT1G55475	At1g55475 [Source:UniProtKB/TrEMBL;Acc:Q940A5]	-2.1528	0.025995
AT2G29730	Glycosyltransferase (Fragment) [Source:UniProtKB/TrEMBL;Acc:W8PVN2]	-2.1544	0.0204017
AT2G04170	TRAF-like family protein [Source:UniProtKB/TrEMBL;Acc:Q6RF45]	-2.1562	0.000620688
AT1G64490	At1g64490 [Source:UniProtKB/TrEMBL;Acc:Q9SGW6]	-2.1605	0.0103368
AT5G03530	RABC2A [Source:UniProtKB/TrEMBL;Acc:A0A178UJG3]	-2.1611	0.00738181
AT1G23330	Alpha/beta-Hydrolases superfamily protein [Source:UniProtKB/TrEMBL;Acc:Q9LR26]	-2.1649	0.00975936
AT5G55200	GrpE protein homolog 1, mitochondrial [Source:UniProtKB/Swiss-Prot;Acc:Q9FLP3]	-2.1651	0.010794
AT1G23870	Probable alpha,alpha-trehalose-phosphate synthase [UDP-forming] 9 [Source:UniProtKB/Swiss-Prot;Acc:Q9LRA7]	-2.1673	0.00951146
AT3G25560	NSP-interacting kinase 2 [Source:UniProtKB/TrEMBL;Acc:F4JA15]	-2.1714	0.00714851
AT1G78290	SRK2C [Source:UniProtKB/TrEMBL;Acc:A0A178W6S8]	-2.1938	0.0197004
AT5G44500	Small nuclear ribonucleoprotein-associated protein [Source:UniProtKB/TrEMBL;Acc:Q9FI15]	-2.2016	0.0346783
AT2G31300	actin-related protein C1B [Source:TAIR;Acc:AT2G31300]	-2.2044	0.0218399
ATCG00680	Photosystem II CP47 reaction center protein [Source:UniProtKB/TrEMBL;Acc:A0A1B1W4X0]	-2.2097	0.00568947
AT1G32900	Granule-bound starch synthase 1, chloroplastic/amyloplastic [Source:UniProtKB/Swiss-Prot;Acc:Q9MAQ0]	-2.2114	2.88628e-05
AT5G55790	At5g55790 [Source:UniProtKB/TrEMBL;Acc:Q9FM60]	-2.2116	7.51087e-05
AT1G58280	Phosphoglycerate mutase-like protein 2 [Source:UniProtKB/Swiss-Prot;Acc:F4IBB2]	-2.2119	0.0330062
AT1G25682	At1g25682 [Source:UniProtKB/TrEMBL;Acc:Q9C609]	-2.2259	0.00110886
AT4G32350	Regulator of Vps4 activity in the MVB pathway protein [Source:UniProtKB/TrEMBL;Acc:Q8RXT2]	-2.2267	0.0196568
AT5G44660	At5g44650 [Source:UniProtKB/TrEMBL;Acc:Q9LU00]	-2.2317	0.0124559
AT5G46400	Tetratricopeptide repeat (TPR)-like superfamily protein [Source:UniProtKB/TrEMBL;Acc:F4KHG8]	-2.2318	0.0182311
AT3G13000	AT3G13000 protein [Source:UniProtKB/TrEMBL;Acc:Q56W79]	-2.2523	0.00182736
AT5G55900	At5g55900 [Source:UniProtKB/TrEMBL;Acc:Q9FG75]	-2.2527	0.0472171
AT4G14750	IQ-domain 19 [Source:TAIR;Acc:AT4G14750]	-2.2543	0.0094625
AT5G23380	Gb [Source:UniProtKB/TrEMBL;Acc:Q9FGE1]	-2.2555	0.011035
AT4G12880	At4g12880 [Source:UniProtKB/TrEMBL;Acc:Q9STZ8]	-2.2578	7.69832e-09
AT5G18860	AT5g18860/F17K4_110 [Source:UniProtKB/TrEMBL;Acc:Q8RY23]	-2.3052	0.0351763
AT1G53520	Fatty-acid-binding protein 3, chloroplastic [Source:UniProtKB/Swiss-Prot;Acc:Q9C8L2]	-2.3128	0.0180091
AT3G60720	Plasmodesmata-located protein 8 [Source:UniProtKB/TrEMBL;Acc:A0A1I9LQV4]	-2.3285	0.00527719
AT1G29710	Pentatricopeptide repeat-containing protein At1g29710, mitochondrial [Source:UniProtKB/Swiss-Prot;Acc:Q9C6G2]	-2.3402	0.0406667
AT1G48780	Uncharacterized protein F11I4_5 [Source:UniProtKB/TrEMBL;Acc:Q9C746]	-2.3478	0.030124
AT1G48260	CBL-interacting serine/threonine-protein kinase 17 [Source:UniProtKB/Swiss-Prot;Acc:Q94C40]	-2.3499	0.0450478
AT1G51580	At1g51580 [Source:UniProtKB/TrEMBL;Acc:Q9C553]	-2.3537	6.59686e-05
AT1G25400	At1g25400 [Source:UniProtKB/TrEMBL;Acc:Q9C6L0]	-2.3616	0.0216484
AT3G13320	Vacuolar cation/proton exchanger 2 [Source:UniProtKB/Swiss-Prot;Acc:Q39254]	-2.3728	5.01406e-06
AT5G42760	Leucine carboxyl methyltransferase [Source:UniProtKB/TrEMBL;Acc:F4K328]	-2.3894	0.0418293
AT2G02450	NAC domain-containing protein 35 [Source:UniProtKB/Swiss-Prot;Acc:Q9ZVP8]	-2.4023	0.00698403
AT2G35760	CASP-like protein 2B2 [Source:UniProtKB/Swiss-Prot;Acc:Q8L924]	-2.4151	4.67304e-06
AT5G42660	AT5g42660/MJB21_3 [Source:UniProtKB/TrEMBL;Acc:Q93Z91]	-2.4241	0.00813336
AT3G08000	At3g08000 [Source:UniProtKB/TrEMBL;Acc:Q9SFB4]	-2.4265	0.00683543
AT1G71790	Probable F-actin-capping protein subunit beta [Source:UniProtKB/Swiss-Prot;Acc:Q9M9G7]	-2.4313	0.0327661
AT1G67830	Alpha-L-fucosidase 3 [Source:UniProtKB/Swiss-Prot;Acc:Q9FXE5]	-2.4316	0.00581041
ATCG00290	#N/A	-2.4455	0.0413771
AT3G52340		-2.4524	0.00252934
AT3G27960	Protein KINESIN LIGHT CHAIN-RELATED 2 [Source:UniProtKB/Swiss-Prot;Acc:Q9LII8]	-2.4599	0.0233222
AT3G55730	MYB transcription factor-like protein [Source:UniProtKB/TrEMBL;Acc:Q9LDW5]	-2.466	0.0481798
AT2G46535	Uncharacterized protein At2g46535 [Source:UniProtKB/TrEMBL;Acc:Q84JE7]	-2.4665	0.0192339
ATCG00180	DNA-directed RNA polymerase subunit beta' [Source:UniProtKB/Swiss-Prot;Acc:P56763]	-2.469	0.00516244
AT4G22990	Major Facilitator Superfamily with SPX (SYG1/Pho81/XPR1) domain-containing protein [Source:UniProtKB/TrEMBL;Acc:F4JMQ7]	-2.4766	0.000170577
AT2G38820	Protein of unknown function (DUF506) [Source:TAIR;Acc:AT2G38820]	-2.4778	0.000561542
AT1G78490	CYP708A3 [Source:UniProtKB/TrEMBL;Acc:A0A178WMR8]	-2.5008	0.0178682
AT1G29980	Uncharacterized protein T1P2.9 [Source:UniProtKB/TrEMBL;Acc:Q9C8S1]	-2.5296	0.0152672
AT3G27170	CLC-B [Source:UniProtKB/TrEMBL;Acc:A0A178VKG6]	-2.5338	0.0365415
AT5G19730	Probable pectinesterase 53 [Source:UniProtKB/Swiss-Prot;Acc:Q8VYZ3]	-2.5442	0.00495395
AT3G03820	Putative auxin-induced protein [Source:UniProtKB/TrEMBL;Acc:Q9SRV9]	-2.5492	0.00129596
AT2G40320	TBL33 [Source:UniProtKB/TrEMBL;Acc:A0A178VXJ7]	-2.5727	0.02939
AT4G20910	Small RNA 2'-O-methyltransferase [Source:UniProtKB/Swiss-Prot;Acc:Q9C5Q8]	-2.589	0.0450864
AT1G31070	GlcNAc1pUT1 [Source:UniProtKB/TrEMBL;Acc:A0A178W850]	-2.5892	4.20344e-05
AT1G79260	CONTAINS InterPro DOMAIN/s: Domain of unknown function DUF1794 (InterPro:IPR014878); Has 30201 Blast hits to 17322 proteins in 780 species: Archae - 12; Bacteria - 1396; Metazoa - 17338; Fungi - 3422; Plants - 5037; Viruses - 0; Other Eukaryotes - 2 /.../ource: NCBI BLink). [Source:TAIR;Acc:AT1G79260]	-2.5907	0.00730854
AT3G21950	S-adenosyl-L-methionine-dependent methyltransferases superfamily protein [Source:UniProtKB/TrEMBL;Acc:A0A1I9LSP4]	-2.5923	0.00276178
ATCG00040	maturase K [Source:TAIR;Acc:ATCG00040]	-2.5937	5.15886e-06
AT3G43920	Endoribonuclease Dicer homolog 3 [Source:UniProtKB/Swiss-Prot;Acc:Q9LXW7]	-2.5968	0.0394129
AT4G19070	Cadmium-induced protein AS8 [Source:UniProtKB/Swiss-Prot;Acc:P42735]	-2.5983	0.00410182
AT1G28570	GDSL esterase/lipase At1g28570 [Source:UniProtKB/Swiss-Prot;Acc:Q9FXJ1]	-2.5986	0.0335242
AT2G43720	At2g43720/F18O19.17 [Source:UniProtKB/TrEMBL;Acc:O22831]	-2.6052	0.00912063
ATCG00480	ATP synthase subunit beta, chloroplastic [Source:UniProtKB/Swiss-Prot;Acc:P19366]	-2.6225	0.00839808
AT3G02320	tRNA (guanine(26)-N(2))-dimethyltransferase [Source:UniProtKB/TrEMBL;Acc:A0A178VEZ9]	-2.6245	0.0392443
AT4G09135	#N/A	-2.6377	0.0473681
AT5G24150	Squalene epoxidase 5 [Source:UniProtKB/Swiss-Prot;Acc:O65404]	-2.638	1.71475e-05
AT3G62070	At3g62070 [Source:UniProtKB/TrEMBL;Acc:Q9M1R7]	-2.6417	0.00485052
AT1G55900	Mitochondrial import inner membrane translocase subunit TIM50 [Source:UniProtKB/Swiss-Prot;Acc:Q8VYE2]	-2.6431	0.000392757
AT4G03230	S-locus lectin protein kinase family protein [Source:TAIR;Acc:AT4G03230]	-2.6531	0.0302533
AT1G70470	At1g70470 [Source:UniProtKB/TrEMBL;Acc:Q9CAL7]	-2.6636	0.044482
AT1G02820	LEA3 [Source:UniProtKB/TrEMBL;Acc:A0A178WJ88]	-2.667	0.00315507
AT3G29375	XH domain-containing protein [Source:UniProtKB/TrEMBL;Acc:Q9LIA7]	-2.6755	0.00047391
AT2G46572	#N/A	-2.6973	0.0336583
AT1G11060	WAPL (Wings apart-like protein regulation of heterochromatin) protein [Source:UniProtKB/TrEMBL;Acc:F4I7C7]	-2.7063	0.000654233
AT5G47900	Protein of unknown function (DUF1624) [Source:TAIR;Acc:AT5G47900]	-2.715	0.00226784
AT4G38330	At4g38330 [Source:UniProtKB/TrEMBL;Acc:Q9SVF2]	-2.7179	0.00420984
AT5G42860	Emb [Source:UniProtKB/TrEMBL;Acc:Q9FMN3]	-2.7526	0.00129571
AT3G08505	E3 ubiquitin-protein ligase makorin [Source:UniProtKB/Swiss-Prot;Acc:Q6IDS6]	-2.7595	0.00404746
AT1G52700	Alpha/beta-Hydrolases superfamily protein [Source:UniProtKB/TrEMBL;Acc:A0A1P8AQT5]	-2.7736	0.00807531
AT4G09180	Transcription factor bHLH81 [Source:UniProtKB/Swiss-Prot;Acc:Q9M0R0]	-2.7737	0.000617225
AT2G33570	Galactan beta-1,4-galactosyltransferase GALS1 [Source:UniProtKB/Swiss-Prot;Acc:O22807]	-2.7881	0.00223067
AT5G66750	ATP-dependent DNA helicase DDM1 [Source:UniProtKB/Swiss-Prot;Acc:Q9XFH4]	-2.8301	0.0485854
AT1G52080	Actin binding protein family [Source:UniProtKB/TrEMBL;Acc:Q9SAU9]	-2.8455	0.0250416
AT5G01840	Transcription repressor OFP1 [Source:UniProtKB/Swiss-Prot;Acc:Q9LZW2]	-2.863	0.0108905
ATMG00080		-2.8663	0.00851759
AT1G09240	Nicotianamine synthase 3 [Source:UniProtKB/Swiss-Prot;Acc:O80483]	-2.878	0.000409859
AT1G62800	Aspartate aminotransferase [Source:UniProtKB/TrEMBL;Acc:F4I0D4]	-2.8919	0.00238775
AT5G41620	Uncharacterized protein At5g41620 [Source:UniProtKB/Swiss-Prot;Acc:Q66GQ2]	-2.9113	0.0478401
AT5G42010	Similarity to unknown protein [Source:UniProtKB/TrEMBL;Acc:Q9FHY2]	-2.915	0.019117
AT3G19590	BUB3.1 [Source:UniProtKB/TrEMBL;Acc:A0A178VA46]	-2.9185	0.0302148
AT5G64230	unknown protein; FUNCTIONS IN: molecular_function unknown; INVOLVED IN: biological_process unknown; LOCATED IN: endomembrane system; EXPRESSED IN: 9 plant structures; EXPRESSED DURING: 4 anthesis, petal differentiation and expansion stage; BEST Arab /.../s thaliana protein match is: unknown protein (TAIR:AT3G19920.1); Has 35333 Blast hits to 34131 proteins in 2444 species: Archae - 798; Bacteria …	-2.9473	0.0365384
AT1G61215	At1g61215 [Source:UniProtKB/TrEMBL;Acc:Q6AWX2]	-2.9593	0.0186747
AT5G24990	Enhanced disease resistance-like protein (DUF1336) [Source:UniProtKB/TrEMBL;Acc:Q94AK1]	-2.9611	0.0341352
AT1G66250	Glucan endo-1,3-beta-glucosidase 2 [Source:UniProtKB/Swiss-Prot;Acc:Q9C7U5]	-2.9865	0.0072885
AT1G06467	#N/A	-2.9912	0.0296248
AT2G43250	Transmembrane protein [Source:UniProtKB/TrEMBL;Acc:Q9ZW70]	-3.0055	0.0110959
AT3G62930	Monothiol glutaredoxin-S6 [Source:UniProtKB/Swiss-Prot;Acc:Q9LYC8]	-3.0387	0.013488
AT5G59440	P-loop containing nucleoside triphosphate hydrolases superfamily protein [Source:UniProtKB/TrEMBL;Acc:F4KJ62]	-3.0575	0.00033623
AT4G27340	tRNA (guanine(37)-N1)-methyltransferase 2 [Source:UniProtKB/Swiss-Prot;Acc:Q6NQ64]	-3.0624	0.00109577
AT5G19830	Peptidyl-tRNA hydrolase, mitochondrial [Source:UniProtKB/Swiss-Prot;Acc:Q6NLS8]	-3.0829	0.00485463
AT2G28500	LOB domain-containing protein 11 [Source:UniProtKB/Swiss-Prot;Acc:Q9SK08]	-3.0969	0.0404642
AT1G21880	LYP2 [Source:UniProtKB/TrEMBL;Acc:A0A178W9K9]	-3.1063	0.00100349
AT3G20300	AT3g20300/MQC12_5 [Source:UniProtKB/TrEMBL;Acc:Q8VXV8]	-3.1131	0.00012085
AT2G19720	40S ribosomal protein S15a-2 [Source:UniProtKB/Swiss-Prot;Acc:O82205]	-3.121	0.00484483
AT5G59220	Probable protein phosphatase 2C 78 [Source:UniProtKB/Swiss-Prot;Acc:Q9FIF5]	-3.1307	0.00966342
AT1G47720	Protein OSB1, mitochondrial [Source:UniProtKB/Swiss-Prot;Acc:Q9SX99]	-3.1402	0.00124682
AT2G41312	#N/A	-3.1412	0.00409727
AT5G22790	Protein RETICULATA-RELATED 1, chloroplastic [Source:UniProtKB/Swiss-Prot;Acc:Q9FGP9]	-3.1487	0.00463772
AT4G16700	Phosphatidylserine decarboxylase proenzyme 1, mitochondrial [Source:UniProtKB/Swiss-Prot;Acc:Q84V22]	-3.1559	0.00580219
AT3G27010	TCP20 [Source:UniProtKB/TrEMBL;Acc:A0A178VAT1]	-3.1609	0.00418192
AT2G35035	URED [Source:UniProtKB/TrEMBL;Acc:A0A178VPQ5]	-3.1654	0.0302369
AT4G17440	Chromogranin (DUF1639) [Source:UniProtKB/TrEMBL;Acc:O23587]	-3.1705	0.000417733
AT1G19950	HVA22-like protein h [Source:UniProtKB/Swiss-Prot;Acc:Q8LEM6]	-3.1824	0.000137929
AT5G67200	Probable inactive receptor kinase At5g67200 [Source:UniProtKB/Swiss-Prot;Acc:Q93Y06]	-3.1828	0.0116525
AT2G34490	Cytochrome P450 710A2 [Source:UniProtKB/Swiss-Prot;Acc:O64698]	-3.1905	0.00294513
AT2G32795	#N/A	-3.1984	0.0285304
AT3G43600	Indole-3-acetaldehyde oxidase [Source:UniProtKB/Swiss-Prot;Acc:Q7G192]	-3.2143	2.75059e-06
AT5G20930	Serine/threonine-protein kinase TOUSLED [Source:UniProtKB/Swiss-Prot;Acc:Q39238]	-3.2216	0.0206575
AT5G20510	PHD finger protein ALFIN-LIKE 5 [Source:UniProtKB/Swiss-Prot;Acc:Q5XEM9]	-3.2344	0.0226301
AT4G32295	Histone acetyltransferase [Source:UniProtKB/TrEMBL;Acc:Q84JY3]	-3.2447	0.0305485
AT3G52520	At3g52520 [Source:UniProtKB/TrEMBL;Acc:Q9SVD3]	-3.2611	0.0194906
AT1G03650	Acyl-CoA N-acyltransferases (NAT) superfamily protein [Source:UniProtKB/TrEMBL;Acc:Q8GWN1]	-3.2614	0.0221893
AT3G55290	NAD(P)-binding Rossmann-fold superfamily protein [Source:UniProtKB/TrEMBL;Acc:Q94AL3]	-3.2673	0.0289742
AT3G03270	AT3G03270 protein [Source:UniProtKB/TrEMBL;Acc:Q8LFK2]	-3.2771	0.000171601
AT1G10120	Transcription factor bHLH74 [Source:UniProtKB/Swiss-Prot;Acc:Q6NKN9]	-3.286	6.02309e-05
AT5G18060	SAUR23 [Source:UniProtKB/TrEMBL;Acc:A0A178UM65]	-3.287	0.000606452
AT3G06890	At3g06890 [Source:UniProtKB/TrEMBL;Acc:Q9M910]	-3.2936	0.0433684
AT1G62710	Vacuolar-processing enzyme beta-isozyme [Source:UniProtKB/Swiss-Prot;Acc:Q39044]	-3.2938	0.000772732
AT5G43050	At5g43050 [Source:UniProtKB/TrEMBL;Acc:Q9FMH9]	-3.2997	0.000100498
AT3G29100	Vesicle transport v-SNARE 13 [Source:UniProtKB/Swiss-Prot;Acc:Q9LVP9]	-3.3703	0.016591
AT2G19120	P-loop containing nucleoside triphosphate hydrolases superfamily protein [Source:UniProtKB/TrEMBL;Acc:O64476]	-3.38	0.00976579
AT5G10830	At5g10830 [Source:UniProtKB/TrEMBL;Acc:Q9LEV6]	-3.3843	0.0116586
AT5G54280	Myosin-2 [Source:UniProtKB/Swiss-Prot;Acc:F4K0A6]	-3.4487	0.00028418
AT5G55380	Probable long-chain-alcohol O-fatty-acyltransferase 1 [Source:UniProtKB/Swiss-Prot;Acc:Q9FJ72]	-3.4543	0.0167528
AT2G30780	Pentatricopeptide repeat-containing protein At2g30780 [Source:UniProtKB/Swiss-Prot;Acc:O49343]	-3.4651	0.00616518
AT3G22750	Kinase-like protein [Source:UniProtKB/TrEMBL;Acc:Q9LUI6]	-3.4752	0.00431706
AT5G00765	#N/A	-3.4768	0.00510244
AT3G09775	#N/A	-3.5591	0.0458458
ATCG00640	50S ribosomal protein L33, chloroplastic [Source:UniProtKB/Swiss-Prot;Acc:P56796]	-3.5758	4.89391e-05
AT1G02970	Wee1-like protein kinase [Source:UniProtKB/Swiss-Prot;Acc:Q8L4H0]	-3.5823	0.0037935
AT2G04235	unknown protein; FUNCTIONS IN: molecular_function unknown; INVOLVED IN: biological_process unknown; LOCATED IN: cellular_component unknown; EXPRESSED IN: cultured cell; Has 713 Blast hits to 345 proteins in 122 species: Archae - 2; Bacteria - 262; M /.../ - 138; Fungi - 55; Plants - 39; Viruses - 0; Other Eukaryotes - 217 (source: NCBI BLink). [Source:TAIR;Acc:AT2G04235]	-3.5926	0.0111148
AT3G23090	TPX2 (Targeting protein for Xklp2) protein family [Source:UniProtKB/TrEMBL;Acc:A0A1I9LQY2]	-3.606	0.00150824
AT3G25580	Thioredoxin superfamily protein [Source:UniProtKB/TrEMBL;Acc:Q9LSU4]	-3.6293	2.11042e-05
AT5G44050	Protein DETOXIFICATION 28 [Source:UniProtKB/Swiss-Prot;Acc:Q9FNC1]	-3.681	0.04906
AT5G53200	TRY [Source:UniProtKB/TrEMBL;Acc:A0A178UFU9]	-3.7004	1.15112e-06
AT2G20880	Ethylene-responsive transcription factor ERF053 [Source:UniProtKB/Swiss-Prot;Acc:Q9SKT1]	-3.7618	0.0401195
AT5G19300	At5g19300 [Source:UniProtKB/TrEMBL;Acc:Q6NLH7]	-3.7734	0.0058352
AT3G02725	#N/A	-3.7872	0.0488779
AT4G16465	#N/A	-3.7968	0.0371329
AT3G46020	At3g46020 [Source:UniProtKB/TrEMBL;Acc:Q9LZT1]	-3.802	0.019057
AT4G39560	F-box/kelch-repeat protein At4g39560 [Source:UniProtKB/Swiss-Prot;Acc:Q67XN8]	-3.8049	0.0265504
AT3G60710	Putative FBD-associated F-box protein At3g60710 [Source:UniProtKB/Swiss-Prot;Acc:Q9LZZ2]	-3.866	0.0353917
AT5G42780	Zinc-finger homeodomain protein 13 [Source:UniProtKB/Swiss-Prot;Acc:Q9FMY7]	-3.882	0.0125711
AT3G20860	Serine/threonine-protein kinase Nek6 [Source:UniProtKB/Swiss-Prot;Acc:Q9LT35]	-3.8933	0.000536643
AT1G31150	F28K20.8 protein [Source:UniProtKB/TrEMBL;Acc:Q9SA08]	-3.8967	0.00212888
AT5G60020	Laccase-17 [Source:UniProtKB/Swiss-Prot;Acc:Q9FJD5]	-3.9132	0.017831
AT3G56810	Uncharacterized protein T8M16_140 [Source:UniProtKB/TrEMBL;Acc:Q9LES7]	-3.9149	0.000571247
AT4G37130	Nuclear pore complex protein NUP58 [Source:UniProtKB/Swiss-Prot;Acc:Q8RWH9]	-3.9374	2.00016e-05
AT1G66750	CDKD [Source:UniProtKB/TrEMBL;Acc:A0A178WBE6]	-3.9401	0.000112502
AT1G68470	Probable xyloglucan galactosyltransferase GT17 [Source:UniProtKB/Swiss-Prot;Acc:Q9CA34]	-3.9419	0.0211704
AT1G09087	#N/A	-3.9488	0.0337688
AT5G48800	BTB/POZ domain-containing protein At5g48800 [Source:UniProtKB/Swiss-Prot;Acc:Q9FKB6]	-3.9545	0.000350022
AT4G31870	Putative glutathione peroxidase 7, chloroplastic [Source:UniProtKB/Swiss-Prot;Acc:Q9SZ54]	-3.9639	0.000157654
AT3G23240	Ethylene-responsive transcription factor 1B [Source:UniProtKB/Swiss-Prot;Acc:Q8LDC8]	-3.9687	0.0202011
AT4G38050	Nucleobase-ascorbate transporter 11 [Source:UniProtKB/Swiss-Prot;Acc:Q6SZ87]	-3.9824	0.000687574
AT1G30290	Tetratricopeptide repeat (TPR)-like superfamily protein [Source:TAIR;Acc:AT1G30290]	-4.0066	0.000425086
AT3G51240	Naringenin,2-oxoglutarate 3-dioxygenase [Source:UniProtKB/Swiss-Prot;Acc:Q9S818]	-4.031	0.0290489
AT5G38200	Class I glutamine amidotransferase-like superfamily protein [Source:UniProtKB/TrEMBL;Acc:F4KA45]	-4.0429	0.0367555
AT4G24175	Kinesin-like protein [Source:UniProtKB/TrEMBL;Acc:Q8VY50]	-4.0558	0.00130941
AT4G40080	At4g40080 [Source:UniProtKB/TrEMBL;Acc:A1A6G6]	-4.0818	0.00345219
ATCG00530	envelope membrane protein, chloroplastic [Source:UniProtKB/TrEMBL;Acc:A0A1B1W4V5]	-4.1096	0.000699613
AT1G60930	RECQ helicase L4B [Source:TAIR;Acc:AT1G60930]	-4.191	0.0390838
AT4G19900	Glycosyltransferase (Fragment) [Source:UniProtKB/TrEMBL;Acc:W8Q6J5]	-4.1938	0.0422509
AT1G06143		-4.1958	0.00232811
AT2G40480	WEB family protein At2g40480 [Source:UniProtKB/Swiss-Prot;Acc:Q5XVC7]	-4.2479	0.00406238
AT5G12020	17.6 kDa class II heat shock protein [Source:UniProtKB/Swiss-Prot;Acc:P29830]	-4.2489	0.028656
AT1G02180	Ferredoxin-like protein [Source:UniProtKB/TrEMBL;Acc:Q8GYG8]	-4.25	0.0190608
AT1G11900	Pentatricopeptide repeat-containing protein At1g11900 [Source:UniProtKB/Swiss-Prot;Acc:Q5BIV3]	-4.2683	0.0470321
AT3G17730	NAC domain containing protein 57 [Source:UniProtKB/TrEMBL;Acc:Q9LSH5]	-4.327	0.0319132
AT3G49340	Cysteine protease-like protein [Source:UniProtKB/TrEMBL;Acc:Q9SG15]	-4.3305	0.0144911
AT5G26330	At5g26330 [Source:UniProtKB/TrEMBL;Acc:O81500]	-4.332	0.00399334
AT2G17280		-4.3355	0.0247527
AT3G25670	Leucine-rich repeat (LRR) family protein [Source:UniProtKB/TrEMBL;Acc:F4JA38]	-4.3414	0.000368334
AT5G15190	At5g15190 [Source:UniProtKB/TrEMBL;Acc:Q8GW49]	-4.4204	0.00574566
AT2G45245	#N/A	-4.4349	0.00896889
AT4G15248	B-box domain protein 30 [Source:UniProtKB/Swiss-Prot;Acc:Q1G3I2]	-4.4379	1.39481e-05
AT3G20780	DNA topoisomerase 6 subunit B [Source:UniProtKB/Swiss-Prot;Acc:Q9C5V6]	-4.4564	0.0156632
AT1G77120	Alcohol dehydrogenase class-P [Source:UniProtKB/Swiss-Prot;Acc:P06525]	-4.4626	0.0498204
AT5G04700	Ankyrin repeat family protein [Source:UniProtKB/TrEMBL;Acc:Q9LZ27]	-4.5841	0.0473067
AT4G07625	#N/A	-4.5859	0.0176936
AT1G06080	Delta-9 acyl-lipid desaturase 1 [Source:UniProtKB/Swiss-Prot;Acc:O65797]	-4.6214	0.00538687
AT1G01740	Serine/threonine-protein kinase BSK4 [Source:UniProtKB/Swiss-Prot;Acc:F4HU55]	-4.6632	0.000182035
AT3G18170	Glycosyltransferase family 61 protein [Source:UniProtKB/TrEMBL;Acc:Q9LV23]	-4.6646	0.00528445
AT5G25240	Stress induced protein [Source:UniProtKB/TrEMBL;Acc:Q8GYN8]	-4.7172	2.27547e-06
AT4G21926	unknown protein; FUNCTIONS IN: molecular_function unknown; INVOLVED IN: biological_process unknown; LOCATED IN: cellular_component unknown; Has 30201 Blast hits to 17322 proteins in 780 species: Archae - 12; Bacteria - 1396; Metazoa - 17338; Fungi - /.../ Plants - 5037; Viruses - 0; Other Eukaryotes - 2996 (source: NCBI BLink). [Source:TAIR;Acc:AT4G21926]	-4.7314	0.00157628
AT3G20480	LpxK [Source:UniProtKB/TrEMBL;Acc:A0A178VBJ6]	-4.7562	0.00565322
AT1G19490	Basic-leucine zipper (BZIP) transcription factor family protein [Source:UniProtKB/TrEMBL;Acc:Q8L5Y2]	-4.8423	5.88219e-05
AT1G53480	Mto 1 responding down 1 [Source:UniProtKB/TrEMBL;Acc:Q9LPG4]	-4.8521	4.38948e-12
AT5G36910	At5g36910 [Source:UniProtKB/TrEMBL;Acc:A6QRC1]	-4.8935	4.83867e-05
AT5G52830	Probable WRKY transcription factor 27 [Source:UniProtKB/Swiss-Prot;Acc:Q9FLX8]	-4.8976	2.31145e-06
AT3G14070	Cation/calcium exchanger 3 [Source:UniProtKB/Swiss-Prot;Acc:Q9LJI2]	-5.0584	0.0032797
AT1G70710	Endoglucanase 8 [Source:UniProtKB/Swiss-Prot;Acc:Q9CAC1]	-5.0745	0.0484032
AT5G07745	#N/A	-5.0764	0.0322045
AT5G11990	Proline-rich family protein [Source:UniProtKB/TrEMBL;Acc:Q9LYH4]	-5.0997	0.0354332
AT5G46915	Putative B3 domain-containing protein At5g46915 [Source:UniProtKB/Swiss-Prot;Acc:F4KIX1]	-5.1127	0.026352
AT1G33475	Phytolongin Phyl1.2 [Source:UniProtKB/Swiss-Prot;Acc:Q84WF5]	-5.1186	0.0272626
AT5G43990	SET-domain containing protein lysine methyltransferase family protein [Source:UniProtKB/TrEMBL;Acc:F4K7E3]	-5.1341	0.00715635
AT5G08600	U3 ribonucleoprotein (Utp) family protein [Source:UniProtKB/TrEMBL;Acc:F4KB50]	-5.2152	0.00301878
AT3G04950	SEC-C motif protein [Source:UniProtKB/TrEMBL;Acc:Q681W7]	-5.2281	0.021406
AT1G74929	unknown protein; Has 30201 Blast hits to 17322 proteins in 780 species: Archae - 12; Bacteria - 1396; Metazoa - 17338; Fungi - 3422; Plants - 5037; Viruses - 0; Other Eukaryotes - 2996 (source: NCBI BLink). [Source:TAIR;Acc:AT1G74929]	-5.2409	0.0210155
AT4G08250	Scarecrow-like protein 26 [Source:UniProtKB/Swiss-Prot;Acc:Q9SUF5]	-5.2544	0.0233139
AT1G29560	Zinc finger C-x8-C-x5-C-x3-H type family protein [Source:UniProtKB/TrEMBL;Acc:B3H4U9]	-5.271	0.00270876
AT4G20050	Pectin lyase-like superfamily protein [Source:TAIR;Acc:AT4G20050]	-5.3011	0.00529979
AT4G02810	Protein FANTASTIC FOUR 1 [Source:UniProtKB/Swiss-Prot;Acc:Q9SY06]	-5.3042	0.00343899
AT1G60390		-5.3428	0.0310417
AT4G18340	Beta-1,3-glucanase-like protein [Source:UniProtKB/TrEMBL;Acc:Q8L837]	-5.446	0.000183253
AT1G69526	S-adenosyl-L-methionine-dependent methyltransferases superfamily protein [Source:UniProtKB/TrEMBL;Acc:F4I261]	-5.5059	0.00103215
AT5G42690	Expressed protein [Source:UniProtKB/TrEMBL;Acc:Q45GG2]	-5.5096	0.0306596
AT3G48970	Heavy metal-associated isoprenylated plant protein 31 [Source:UniProtKB/Swiss-Prot;Acc:Q84K70]	-5.5717	0.00540764
AT4G25420	Gibberellin 20 oxidase 1 [Source:UniProtKB/Swiss-Prot;Acc:Q39110]	-5.5866	0.040416
AT2G41050	PQ-loop repeat family protein / transmembrane family protein [Source:UniProtKB/TrEMBL;Acc:Q8RXY4]	-5.5915	0.0119552
AT5G55950	Nucleotide-sugar uncharacterized transporter 2 [Source:UniProtKB/Swiss-Prot;Acc:Q9FG70]	-5.6065	0.000958041
AT3G01675	#N/A	-5.6233	0.020676
AT2G29130	Laccase-2 [Source:UniProtKB/Swiss-Prot;Acc:O81081]	-5.6589	0.000631269
AT2G45400	Protein BRI1-5 ENHANCED 1 [Source:UniProtKB/Swiss-Prot;Acc:O22133]	-5.6972	0.0182859
AT1G14730	Probable transmembrane ascorbate ferrireductase 3 [Source:UniProtKB/Swiss-Prot;Acc:Q67ZF6]	-5.7051	0.0390726
ATCG00710	Photosystem II reaction center protein H [Source:UniProtKB/Swiss-Prot;Acc:P56780]	-5.7218	0.00286386
AT1G23205	At1g23205 [Source:UniProtKB/TrEMBL;Acc:O49297]	-5.7514	0.00969551
AT1G22340	UDP-glycosyltransferase 85A7 [Source:UniProtKB/Swiss-Prot;Acc:Q9LME8]	-5.7799	0.0288986
AT5G07885	#N/A	-5.8812	0.0324019
AT2G15950	#N/A	-5.9492	0.040696
ATCG00360	Tetratricopeptide repeat (TPR)-like superfamily protein [Source:TAIR;Acc:ATCG00360]	-5.965	1.57186e-06
AT3G24460	AT3g24470/MXP5_4 [Source:UniProtKB/TrEMBL;Acc:Q8VZI4]	-5.9866	0.000354612
AT4G20230	Terpenoid cyclases/Protein prenyltransferases superfamily protein [Source:TAIR;Acc:AT4G20230]	-6.0315	0.021095
AT2G17900	SET domain group 37 [Source:TAIR;Acc:AT2G17900]	-6.0338	0.00600362
AT5G12360	Protein PATRONUS 2 [Source:UniProtKB/Swiss-Prot;Acc:Q94CK6]	-6.0572	0.00814083
AT1G74400	Putative pentatricopeptide repeat-containing protein At1g74400 [Source:UniProtKB/Swiss-Prot;Acc:Q9CA73]	-6.1204	0.0359254
AT5G56720	Malate dehydrogenase [Source:UniProtKB/TrEMBL;Acc:A0A178UAN5]	-6.1263	0.0142448
AT1G03935	#N/A	-6.1418	0.00767589
AT2G38340	Dehydration-responsive element-binding protein 2E [Source:UniProtKB/Swiss-Prot;Acc:O80917]	-6.1425	0.0290867
AT3G62470	Pentatricopeptide repeat-containing protein At3g62470, mitochondrial [Source:UniProtKB/Swiss-Prot;Acc:Q9LZP3]	-6.1425	0.0290867
AT1G70020	F20P5.24 protein [Source:UniProtKB/TrEMBL;Acc:O04542]	-6.1791	6.54808e-07
AT5G24318	O-Glycosyl hydrolases family 17 protein [Source:UniProtKB/TrEMBL;Acc:F4KH28]	-6.1926	0.0151657
AT3G43430	RING/U-box superfamily protein [Source:UniProtKB/TrEMBL;Acc:Q9M176]	-6.272	0.0130335
AT1G14120	2-oxoglutarate (2OG) and Fe(II)-dependent oxygenase superfamily protein [Source:UniProtKB/TrEMBL;Acc:Q9XI76]	-6.31	0.0179598
AT5G66620	Protein DA1-related 6 [Source:UniProtKB/Swiss-Prot;Acc:Q9FJX8]	-6.3209	0.0117896
AT5G00750	#N/A	-6.3842	0.00450059
AT1G16635	#N/A	-6.4382	0.0191491
AT2G35950	embryo sac development arrest 12 [Source:TAIR;Acc:AT2G35950]	-6.4799	0.000568227
AT5G40840	Sister chromatid cohesion 1 protein 2 [Source:UniProtKB/Swiss-Prot;Acc:Q9FQ20]	-6.5131	0.00331256
AT2G34850	NAD(P)-binding Rossmann-fold superfamily protein [Source:TAIR;Acc:AT2G34850]	-6.601	0.0118428
AT2G25060	ENODL14 [Source:UniProtKB/TrEMBL;Acc:A0A178VWH0]	-6.6653	0.00587549
AT2G27420	Cysteine proteinases superfamily protein [Source:UniProtKB/TrEMBL;Acc:Q9ZQH7]	-6.7269	0.00904975
AT1G18400	Transcription factor BEE 1 [Source:UniProtKB/Swiss-Prot;Acc:Q8GZ13]	-6.7308	0.00411051
AT1G62045	Ankyrin repeat protein [Source:UniProtKB/TrEMBL;Acc:Q8GYM5]	-6.7489	0.000562001
ATCG00270	Photosystem II D2 protein [Source:UniProtKB/Swiss-Prot;Acc:P56761]	-6.7653	0.00228706
AT3G48250	Pentatricopeptide repeat-containing protein At3g48250, chloroplastic [Source:UniProtKB/Swiss-Prot;Acc:Q9STK5]	-6.8491	0.00357248
AT5G18700	Serine/threonine-protein kinase RUNKEL [Source:UniProtKB/Swiss-Prot;Acc:F4JY37]	-6.9189	2.31347e-05
AT4G37480	Chaperone DnaJ-domain superfamily protein [Source:UniProtKB/TrEMBL;Acc:F4JS27]	-6.924	0.00661246
AT1G68795	CLAVATA3/ESR (CLE)-related protein 12 [Source:UniProtKB/Swiss-Prot;Acc:Q29PU4]	-7.0315	0.0022729
AT1G20490	AMP-dependent synthetase and ligase family protein [Source:TAIR;Acc:AT1G20490]	-7.1468	0.000588861
AT1G79310	Metacaspase-7 [Source:UniProtKB/Swiss-Prot;Acc:Q6XPT5]	-7.3644	0.0438202
AT3G05740	ATP-dependent DNA helicase Q-like 1 [Source:UniProtKB/Swiss-Prot;Acc:Q9FT74]	-7.4519	0.0407039
AT5G07000	Cytosolic sulfotransferase 14 [Source:UniProtKB/Swiss-Prot;Acc:Q8GZ53]	-7.4699	0.0001586
AT1G70920	Homeobox-leucine zipper protein ATHB-X [Source:UniProtKB/Swiss-Prot;Acc:Q8GXM7]	-7.8383	0.0317923
AT1G04220	3-ketoacyl-CoA synthase 2 [Source:UniProtKB/Swiss-Prot;Acc:Q5XEP9]	-8.2683	6.89966e-08
AT1G78320	Glutathione S-transferase U23 [Source:UniProtKB/Swiss-Prot;Acc:Q9M9F1]	-8.3698	0.00812618
ATCG01080	NAD(P)H-quinone oxidoreductase subunit 6, chloroplastic [Source:UniProtKB/Swiss-Prot;Acc:Q95695]	-8.5795	2.47916e-07
AT3G49330	Plant invertase/pectin methylesterase inhibitor superfamily protein [Source:UniProtKB/TrEMBL;Acc:Q9CA10]	-10.8994	0.0498409
ATMG09980	#N/A	-10.9513	0.0446305
AT5G47530	Cytochrome b561 and DOMON domain-containing protein [Source:UniProtKB/TrEMBL;Acc:A0A178USN6]	-11.0945	0.0321811
AT5G66080	Probable protein phosphatase 2C 79 [Source:UniProtKB/Swiss-Prot;Acc:Q9FKX4]	-11.2066	0.0266551
AT5G42280	Cysteine/Histidine-rich C1 domain family protein [Source:UniProtKB/TrEMBL;Acc:F4K1I0]	-11.3554	0.0182805
AT3G58350	Protein RESTRICTED TEV MOVEMENT 3 [Source:UniProtKB/Swiss-Prot;Acc:D5K228]	-11.3772	0.0161755
AT3G44440	Uncharacterized protein T22K7_120 [Source:UniProtKB/TrEMBL;Acc:Q9M281]	-11.5443	0.00448314
AT3G19050	POK2 [Source:UniProtKB/TrEMBL;Acc:A0A178VJB1]	-11.5507	0.0160917
AT1G52620	Pentatricopeptide repeat-containing protein At1g52620 [Source:UniProtKB/Swiss-Prot;Acc:Q9SSR4]	-11.6941	0.00235206
AT1G27565	unknown protein; FUNCTIONS IN: molecular_function unknown; INVOLVED IN: biological_process unknown; LOCATED IN: cellular_component unknown; BEST Arabidopsis thaliana protein match is: unknown protein (TAIR:AT1G52905.1); Has 3 Blast hits to 3 protein /.../ species: Archae - 0; Bacteria - 0; Metazoa - 0; Fungi - 0; Plants - 3; Viruses - 0; Other Eukaryotes - 0 (source: NCBI BLink). [Source:TAIR;Acc…	-11.7977	0.00503817
AT1G72620	Alpha/beta-Hydrolases superfamily protein [Source:UniProtKB/TrEMBL;Acc:F4IDE6]	-11.8044	0.00494765
AT4G38092	unknown protein; FUNCTIONS IN: molecular_function unknown; INVOLVED IN: biological_process unknown; LOCATED IN: endomembrane system; BEST Arabidopsis thaliana protein match is: unknown protein (TAIR:AT3G04490.1); Has 30201 Blast hits to 17322 protei /.../780 species: Archae - 12; Bacteria - 1396; Metazoa - 17338; Fungi - 3422; Plants - 5037; Viruses - 0; Other Eukaryotes - 2996 (source: NCBI BLin…	-11.8337	0.00468588
AT5G59660	Leucine-rich repeat protein kinase family protein [Source:TAIR;Acc:AT5G59660]	-11.8956	0.00707728
AT3G52770	ZPR3 [Source:UniProtKB/TrEMBL;Acc:A0A178VBM1]	-12.06	0.00105854
AT4G24860	P-loop containing nucleoside triphosphate hydrolases superfamily protein [Source:UniProtKB/TrEMBL;Acc:F4JRR2]	-12.1044	0.0023108
AT5G61350	Probable receptor-like protein kinase At5g61350 [Source:UniProtKB/Swiss-Prot;Acc:Q9FLJ8]	-12.1495	0.000442672
AT1G01520	ASG4 [Source:UniProtKB/TrEMBL;Acc:A0A384LJW3]	-12.2644	0.000904926
AT2G37380	Probable membrane-associated kinase regulator 3 [Source:UniProtKB/Swiss-Prot;Acc:Q9ZUS8]	-12.427	0.00103463
AT3G56830	At3g56830 [Source:UniProtKB/TrEMBL;Acc:Q9LES5]	-12.4383	0.00158959
AT1G08937	#N/A	-12.4623	0.000631345
AT4G00200	AT-hook motif nuclear-localized protein 7 [Source:UniProtKB/Swiss-Prot;Acc:Q4V3E0]	-12.6962	3.78275e-05
AT3G25900	Homocysteine S-methyltransferase 1 [Source:UniProtKB/Swiss-Prot;Acc:Q9SDL7]	-12.8078	0.000248472
AT5G17370	Transducin/WD40 repeat-like superfamily protein [Source:TAIR;Acc:AT5G17370]	-13.1943	0.0259777
AT5G25830	GATA transcription factor 12 [Source:UniProtKB/Swiss-Prot;Acc:P69781]	-14.7027	1.85896e-11

## Sheet: Table S5
SI Appendix Table S5 Differentially expressed gene (DEGs) in the mutant of nac90-1 plants, compared to Wild-type.
ID	Annotation	nac90-1/WT Log2 (FC)	P value
AT3G55920	Peptidyl-prolyl cis-trans isomerase CYP21-2 [Source:UniProtKB/Swiss-Prot;Acc:Q8L8W5]	3.43436	1.45007e-06
AT2G44240	At2g44240/F4I1.5 [Source:UniProtKB/TrEMBL;Acc:O64859]	3.25339	0.000132724
AT2G14610	Pathogenesis-related protein 1 [Source:UniProtKB/Swiss-Prot;Acc:P33154]	3.23446	4.01987e-05
AT3G18250	Putative membrane lipoprotein [Source:UniProtKB/TrEMBL;Acc:Q6E248]	3.17598	8.84945e-05
AT3G63380	Calcium-transporting ATPase [Source:UniProtKB/TrEMBL;Acc:A0A178VEV7]	3.16909	0.000106692
AT3G28510	AAA-ATPase At3g28510 [Source:UniProtKB/Swiss-Prot;Acc:Q9LH84]	2.97047	5.99602e-05
AT5G09672	#N/A	2.88229	0.000612394
AT1G28480	Glutaredoxin-C9 [Source:UniProtKB/Swiss-Prot;Acc:Q9SGP6]	2.86667	1.35263e-05
AT2G18660	EG45-like domain containing protein 2 [Source:UniProtKB/Swiss-Prot;Acc:Q9ZV52]	2.78605	0.000100587
AT2G19190	Senescence-induced receptor-like serine/threonine-protein kinase [Source:UniProtKB/Swiss-Prot;Acc:O64483]	2.65602	0.000124165
AT1G21310	Extensin-3 [Source:UniProtKB/Swiss-Prot;Acc:Q9FS16]	2.64038	0.000163044
AT3G46090	ZAT7 [Source:UniProtKB/TrEMBL;Acc:A0A178VI57]	2.60519	3.68905e-05
AT3G13950	AT3G13950 protein [Source:UniProtKB/TrEMBL;Acc:B9DG91]	2.54581	0.00011604
AT3G50770	Probable calcium-binding protein CML41 [Source:UniProtKB/Swiss-Prot;Acc:Q8L3R2]	2.54385	0.000172487
AT5G20230	SAG14 [Source:UniProtKB/TrEMBL;Acc:A0A178UM84]	2.54183	6.17765e-05
AT4G19112	#N/A	2.49998	0.000690084
AT5G22570	Probable WRKY transcription factor 38 [Source:UniProtKB/Swiss-Prot;Acc:Q8GWF1]	2.4759	5.52159e-05
AT5G09290	3'(2'),5'-bisphosphate nucleotidase-like protein [Source:UniProtKB/TrEMBL;Acc:Q0WTK9]	2.45066	6.75889e-05
AT2G27660	Cysteine/Histidine-rich C1 domain family protein [Source:UniProtKB/TrEMBL;Acc:Q9ZUW8]	2.45058	0.000100416
AT1G65690	NDR1/HIN1-like protein 6 [Source:UniProtKB/Swiss-Prot;Acc:Q8LD98]	2.43736	0.00019704
AT2G29350	SAG13 [Source:UniProtKB/TrEMBL;Acc:A0A178VTS8]	2.42365	0.000207124
AT1G51890	Leucine-rich repeat protein kinase family protein [Source:TAIR;Acc:AT1G51890]	2.37766	0.000131832
AT5G64810	Probable WRKY transcription factor 51 [Source:UniProtKB/Swiss-Prot;Acc:Q93WU9]	2.35182	0.00015848
AT1G36622	Transmembrane protein [Source:UniProtKB/TrEMBL;Acc:Q1G3E7]	2.32075	0.000329303
AT3G25882	NIMIN-2 [Source:UniProtKB/TrEMBL;Acc:A0A178VAB1]	2.30923	0.000121556
AT4G21120		2.30793	0.000149069
AT4G39830	At4g39830 [Source:UniProtKB/TrEMBL;Acc:O65670]	2.28548	9.62365e-05
AT1G78410	VQ motif-containing protein 10 [Source:UniProtKB/Swiss-Prot;Acc:Q8VYI5]	2.2836	0.000378648
AT3G46080	Zinc finger protein ZAT8 [Source:UniProtKB/Swiss-Prot;Acc:Q9LX85]	2.26634	0.000391695
AT1G02450	NIMIN1 [Source:UniProtKB/TrEMBL;Acc:A0A178WC43]	2.25248	0.000272263
AT4G21840	MSRB8 [Source:UniProtKB/TrEMBL;Acc:A0A178V0W9]	2.24911	0.000441095
AT3G05170	Phosphoglycerate mutase-like protein AT74 [Source:UniProtKB/Swiss-Prot;Acc:Q9MAA2]	2.23742	8.66803e-06
AT5G39520	Uncharacterized protein At5g39520 [Source:UniProtKB/TrEMBL;Acc:Q0WW43]	2.2279	0.000309693
AT5G46050	Protein NRT1/ PTR FAMILY 5.2 [Source:UniProtKB/Swiss-Prot;Acc:Q9FNL7]	2.19493	0.000302717
AT2G45220	Probable pectinesterase/pectinesterase inhibitor 17 [Source:UniProtKB/Swiss-Prot;Acc:O22149]	2.18768	0.00052368
AT2G04450	Nudix hydrolase 6 [Source:UniProtKB/Swiss-Prot;Acc:Q9SJC4]	2.17771	0.000290386
AT3G57240	Probable glucan endo-1,3-beta-glucosidase BG3 [Source:UniProtKB/Swiss-Prot;Acc:F4J270]	2.17762	0.000171794
AT1G73810	Core-2/I-branching beta-1,6-N-acetylglucosaminyltransferase family protein [Source:UniProtKB/TrEMBL;Acc:Q9C9T1]	2.17315	0.000159107
AT3G12220	Serine carboxypeptidase-like 16 [Source:UniProtKB/Swiss-Prot;Acc:Q9C7D4]	2.16341	0.000168884
AT4G18250	receptor serine/threonine kinase, putative [Source:TAIR;Acc:AT4G18250]	2.13544	0.000123358
AT4G23700	Cation/H(+) antiporter 17 [Source:UniProtKB/Swiss-Prot;Acc:Q9SUQ7]	2.12478	0.000703196
AT5G38900	Thioredoxin superfamily protein [Source:TAIR;Acc:AT5G38900]	2.12236	0.00028678
AT1G66960	Terpenoid cyclases family protein [Source:TAIR;Acc:AT1G66960]	2.11313	0.000474044
AT1G67980	Putative caffeoyl-CoA O-methyltransferase At1g67980 [Source:UniProtKB/Swiss-Prot;Acc:Q9C9W3]	2.10262	0.000554132
AT5G44568	Transmembrane protein [Source:UniProtKB/TrEMBL;Acc:Q570K8]	2.10116	0.00019494
AT5G13080	WRKY75 [Source:UniProtKB/TrEMBL;Acc:A0A178UJF4]	2.08954	0.000736361
AT1G61800	glucose-6-phosphate/phosphate translocator 2 [Source:TAIR;Acc:AT1G61800]	2.08271	0.00068636
AT3G26830	Bifunctional dihydrocamalexate synthase/camalexin synthase [Source:UniProtKB/Swiss-Prot;Acc:Q9LW27]	2.08212	0.000439407
AT5G26920	Calmodulin-binding protein 60 G [Source:UniProtKB/Swiss-Prot;Acc:F4K2R6]	2.07506	0.000316935
AT4G23810	Probable WRKY transcription factor 53 [Source:UniProtKB/Swiss-Prot;Acc:Q9SUP6]	2.06533	0.000218553
AT1G21240	Wall-associated receptor kinase 3 [Source:UniProtKB/Swiss-Prot;Acc:Q9LMN8]	2.05779	0.000246262
AT3G28580	AAA-ATPase At3g28580 [Source:UniProtKB/Swiss-Prot;Acc:Q9LJJ7]	2.05112	0.000342901
AT4G02380	senescence-associated gene 21 [Source:TAIR;Acc:AT4G02380]	2.04567	0.000381363
AT4G13890	Serine hydroxymethyltransferase 5 [Source:UniProtKB/Swiss-Prot;Acc:Q9SVM4]	2.03341	0.000244998
AT1G51860	Probable LRR receptor-like serine/threonine-protein kinase At1g51860 [Source:UniProtKB/Swiss-Prot;Acc:C0LGG4]	2.03277	0.000210114
AT5G11920	Beta-fructofuranosidase, insoluble isoenzyme CWINV6 [Source:UniProtKB/Swiss-Prot;Acc:Q8W4S6]	2.02809	0.000314037
AT5G44480	Putative UDP-arabinose 4-epimerase 4 [Source:UniProtKB/Swiss-Prot;Acc:Q9FI17]	2.02082	0.000626486
AT1G33030	At1g33030/F9L11_18 [Source:UniProtKB/TrEMBL;Acc:Q9MAP0]	2.01814	0.00027066
AT1G74590	Glutathione S-transferase U10 [Source:UniProtKB/Swiss-Prot;Acc:Q9CA57]	2.01637	0.000850145
AT1G48210	Protein kinase superfamily protein [Source:UniProtKB/TrEMBL;Acc:F4HWU0]	2.01602	0.000236586
AT4G31800	WRKY like transcription factor [Source:UniProtKB/TrEMBL;Acc:Q0WTZ3]	2.00753	0.000157182
AT4G24026	Putative uncharacterized protein [Source:UniProtKB/TrEMBL;Acc:Q0WQ09]	2.00224	0.000254947
AT1G65510	unknown protein; FUNCTIONS IN: molecular_function unknown; INVOLVED IN: N-terminal protein myristoylation; LOCATED IN: endomembrane system; EXPRESSED IN: 9 plant structures; EXPRESSED DURING: LP.06 six leaves visible, LP.04 four leaves visible, 4 an /.../, petal differentiation and expansion stage, LP.08 eight leaves visible; BEST Arabidopsis thaliana protein match is: unknown protein (TAIR:AT1G6…	1.98702	0.000495993
AT5G24200	alpha/beta-Hydrolases superfamily protein [Source:TAIR;Acc:AT5G24200]	1.9744	0.00062414
AT5G27420	E3 ubiquitin-protein ligase ATL31 [Source:UniProtKB/Swiss-Prot;Acc:Q8LGA5]	1.97194	0.00020002
AT1G65486	unknown protein; FUNCTIONS IN: molecular_function unknown; INVOLVED IN: biological_process unknown; LOCATED IN: endomembrane system; BEST Arabidopsis thaliana protein match is: unknown protein (TAIR:AT1G65490.1); Has 30201 Blast hits to 17322 protei /.../780 species: Archae - 12; Bacteria - 1396; Metazoa - 17338; Fungi - 3422; Plants - 5037; Viruses - 0; Other Eukaryotes - 2996 (source: NCBI BLin…	1.97178	0.000162865
AT2G13810	EDTS5 [Source:UniProtKB/TrEMBL;Acc:A0A178VQ02]	1.96335	0.000786168
AT5G23660	Bidirectional sugar transporter SWEET12 [Source:UniProtKB/Swiss-Prot;Acc:O82587]	1.9618	0.000609858
AT2G18690	Expressed protein [Source:UniProtKB/TrEMBL;Acc:Q9ZV49]	1.96178	0.000366722
AT1G33960	P-loop containing nucleoside triphosphate hydrolases superfamily protein [Source:TAIR;Acc:AT1G33960]	1.95182	0.000533027
AT4G35180	Lysine histidine transporter-like 7 [Source:UniProtKB/Swiss-Prot;Acc:Q84WE9]	1.94696	0.000459898
AT4G36110	SAUR9 [Source:UniProtKB/TrEMBL;Acc:A0A178V0P2]	1.94281	0.000533252
AT4G11070	Probable WRKY transcription factor 41 [Source:UniProtKB/Swiss-Prot;Acc:Q8H0Y8]	1.89684	0.000334492
AT3G48640	Transmembrane protein [Source:UniProtKB/TrEMBL;Acc:Q9SMN5]	1.89445	0.000373963
AT2G47130	Short-chain dehydrogenase reductase 3a [Source:UniProtKB/Swiss-Prot;Acc:O80713]	1.87308	0.000371012
AT1G35230	Classical arabinogalactan protein 5 [Source:UniProtKB/Swiss-Prot;Acc:Q8LCE4]	1.86514	0.000505596
AT3G21080	ABC transporter-like protein [Source:UniProtKB/TrEMBL;Acc:Q9LJC4]	1.86145	0.000378103
AT2G43000	Transcription factor JUNGBRUNNEN 1 [Source:UniProtKB/Swiss-Prot;Acc:Q9SK55]	1.85923	0.000615823
AT5G03210	Arabidopsis thaliana genomic DNA, chromosome 5, P1 clone:MOK16 [Source:UniProtKB/TrEMBL;Acc:Q9FYM8]	1.85814	0.000608552
AT3G61198	#N/A	1.84487	0.000902173
AT1G26420	Berberine bridge enzyme-like 7 [Source:UniProtKB/Swiss-Prot;Acc:Q9FZC8]	1.83754	0.000840248
AT3G26440	Transmembrane protein, putative (DUF707) [Source:UniProtKB/TrEMBL;Acc:A0A1I9LLN8]	1.8282	0.000349142
AT4G13395	DVL10 [Source:UniProtKB/TrEMBL;Acc:Q6IM91]	1.82203	0.00203135
AT5G47130	Bax inhibitor-1 family protein [Source:TAIR;Acc:AT5G47130]	1.82092	0.000627023
AT4G04972	unknown protein. [Source:TAIR;Acc:AT4G04972]	1.81944	0.000480146
AT2G35980	NDR1/HIN1-like protein 10 [Source:UniProtKB/Swiss-Prot;Acc:Q9SJ52]	1.81582	0.000795659
AT5G62770	At5g62770 [Source:UniProtKB/TrEMBL;Acc:Q9FM16]	1.81097	0.00069255
AT4G39950	cytochrome P450, family 79, subfamily B, polypeptide 2 [Source:TAIR;Acc:AT4G39950]	1.80991	0.000631368
AT2G39210	At2g39210/T16B24.15 [Source:UniProtKB/TrEMBL;Acc:O80960]	1.80512	0.000655719
AT1G26390	Berberine bridge enzyme-like 4 [Source:UniProtKB/Swiss-Prot;Acc:Q9FZC5]	1.80206	0.00130475
AT2G26400	acireductone dioxygenase 3 [Source:TAIR;Acc:AT2G26400]	1.79814	0.00102857
AT1G19250	Probable flavin-containing monooxygenase 1 [Source:UniProtKB/Swiss-Prot;Acc:Q9LMA1]	1.79109	0.00144648
AT5G38250	LEAF RUST 10 DISEASE-RESISTANCE LOCUS RECEPTOR-LIKE PROTEIN KINASE-like 2.3 [Source:UniProtKB/Swiss-Prot;Acc:F4KA51]	1.78961	0.000610081
AT5G49520	Probable WRKY transcription factor 48 [Source:UniProtKB/Swiss-Prot;Acc:Q9FGZ4]	1.78758	0.000555781
AT2G17040	NAC domain containing protein 36 [Source:UniProtKB/TrEMBL;Acc:F4IME8]	1.78342	0.000281921
AT4G00700	C2 calcium/lipid-binding plant phosphoribosyltransferase family protein [Source:UniProtKB/TrEMBL;Acc:Q8RXU9]	1.78219	0.000616832
AT1G02930	Glutathione S-transferase F6 [Source:UniProtKB/Swiss-Prot;Acc:P42760]	1.77823	0.000777649
AT1G13340	Regulator of Vps4 activity in the MVB pathway protein [Source:UniProtKB/TrEMBL;Acc:Q9FX63]	1.77699	0.000718601
AT3G51440	Protein STRICTOSIDINE SYNTHASE-LIKE 6 [Source:UniProtKB/Swiss-Prot;Acc:Q9SD05]	1.77688	0.000484085
AT3G48650	#N/A	1.77627	0.000306652
AT2G29460	Glutathione S-transferase U4 [Source:UniProtKB/Swiss-Prot;Acc:Q9ZW27]	1.77536	0.00088594
AT1G68620	Probable carboxylesterase 6 [Source:UniProtKB/Swiss-Prot;Acc:Q9SX25]	1.77476	0.00100124
AT1G10340	Ankyrin repeat family protein [Source:UniProtKB/TrEMBL;Acc:Q9SY76]	1.767	0.000323865
AT3G15518	Putative uncharacterized protein [Source:UniProtKB/TrEMBL;Acc:Q8GYA5]	1.76443	0.000597794
AT4G18430	Ras-related protein RABA1e [Source:UniProtKB/Swiss-Prot;Acc:O49513]	1.75311	0.000992294
AT1G60830	RNA-binding (RRM/RBD/RNP motifs) family protein [Source:UniProtKB/TrEMBL;Acc:Q9C6C1]	1.74859	0.000842646
AT4G29850	At4g29850 [Source:UniProtKB/TrEMBL;Acc:Q9SZQ6]	1.74741	0.000731031
AT5G52760	Heavy metal-associated isoprenylated plant protein 14 [Source:UniProtKB/Swiss-Prot;Acc:Q9LTE1]	1.73779	0.000539024
AT1G34180	NAC domain containing protein 16 [Source:TAIR;Acc:AT1G34180]	1.73776	0.000262527
AT3G10930	Uncharacterized protein At3g10930 [Source:UniProtKB/TrEMBL;Acc:Q84TK4]	1.72942	0.000182276
AT2G04495	At2g04495 [Source:UniProtKB/TrEMBL;Acc:Q6NLT2]	1.72501	0.000797961
AT1G57630	Disease resistance protein RPP1-WsB, putative [Source:UniProtKB/TrEMBL;Acc:Q9FVT9]	1.72196	0.00133594
AT3G51330	Eukaryotic aspartyl protease family protein [Source:UniProtKB/TrEMBL;Acc:Q84WU7]	1.7185	0.000354443
AT3G25780	Allene oxide cyclase 3, chloroplastic [Source:UniProtKB/Swiss-Prot;Acc:Q9LS01]	1.70963	0.000257518
AT1G21120	O-methyltransferase family protein [Source:TAIR;Acc:AT1G21120]	1.70725	0.000383127
AT4G21903	Protein DETOXIFICATION [Source:UniProtKB/TrEMBL;Acc:F4JKB8]	1.70688	0.000630284
AT3G44350	NAC domain containing protein 61 [Source:UniProtKB/TrEMBL;Acc:B3H506]	1.70599	0.000800623
AT2G38860	DJ-1 protein homolog E [Source:UniProtKB/Swiss-Prot;Acc:Q9ZV19]	1.70463	0.000894896
AT1G26380	Berberine bridge enzyme-like 3 [Source:UniProtKB/Swiss-Prot;Acc:Q9FZC4]	1.70324	0.000750278
AT1G02920	Glutathione S-transferase F7 [Source:UniProtKB/Swiss-Prot;Acc:Q9SRY5]	1.69245	0.00081974
AT1G10070	Branched-chain-amino-acid aminotransferase 2, chloroplastic [Source:UniProtKB/Swiss-Prot;Acc:Q9M439]	1.69211	0.000578038
AT2G43570	CHI [Source:UniProtKB/TrEMBL;Acc:A0A178W3M3]	1.67675	0.00132786
AT5G53110	RING/U-box superfamily protein [Source:UniProtKB/TrEMBL;Acc:F4KJ04]	1.6757	0.00129324
AT5G25250	Flotillin-like protein 1 [Source:UniProtKB/Swiss-Prot;Acc:Q501E6]	1.67025	0.000252852
AT2G04460	#N/A	1.65693	0.00287417
AT2G04100	Protein DETOXIFICATION 6 [Source:UniProtKB/Swiss-Prot;Acc:Q8RWF5]	1.65328	0.000852673
AT1G45145	Thioredoxin H5 [Source:UniProtKB/Swiss-Prot;Acc:Q39241]	1.6501	0.000685518
AT5G01550	lectin receptor kinase a4.1 [Source:TAIR;Acc:AT5G01550]	1.64876	0.00171326
AT1G61260	Protein of unknown function (DUF761) [Source:TAIR;Acc:AT1G61260]	1.64553	0.000285729
AT3G04640	At3g04640 [Source:UniProtKB/TrEMBL;Acc:Q9SR10]	1.64539	0.000241244
AT1G65484	unknown protein; FUNCTIONS IN: molecular_function unknown; INVOLVED IN: biological_process unknown; LOCATED IN: endomembrane system; Has 30201 Blast hits to 17322 proteins in 780 species: Archae - 12; Bacteria - 1396; Metazoa - 17338; Fungi - 3422; /.../ - 5037; Viruses - 0; Other Eukaryotes - 2996 (source: NCBI BLink). [Source:TAIR;Acc:AT1G65484]	1.64109	0.00220556
AT1G73805	Protein SAR DEFICIENT 1 [Source:UniProtKB/Swiss-Prot;Acc:Q9C9T2]	1.64052	0.00064046
AT4G17500	Ethylene-responsive transcription factor 1A [Source:UniProtKB/Swiss-Prot;Acc:O80337]	1.64025	0.000481389
AT5G26170	Probable WRKY transcription factor 50 [Source:UniProtKB/Swiss-Prot;Acc:Q8VWQ5]	1.63823	0.00117719
AT5G48657	defense protein-related [Source:TAIR;Acc:AT5G48657]	1.62856	0.000408275
AT1G21550	Probable calcium-binding protein CML44 [Source:UniProtKB/Swiss-Prot;Acc:Q9LPK5]	1.62525	0.000732217
AT1G33950	Immune-associated nucleotide-binding protein 7 [Source:UniProtKB/Swiss-Prot;Acc:Q9C8V2]	1.62443	0.00128572
AT3G28210	Zinc finger AN1 domain-containing stress-associated protein 12 [Source:UniProtKB/Swiss-Prot;Acc:Q67YE6]	1.62421	0.000586874
AT5G05300	Gb [Source:UniProtKB/TrEMBL;Acc:Q9FLC4]	1.61625	0.000295844
AT3G09960	Calcineurin-like metallo-phosphoesterase superfamily protein [Source:UniProtKB/TrEMBL;Acc:Q8LEC0]	1.6128	0.000972612
AT2G42360	E3 ubiquitin-protein ligase ATL41 [Source:UniProtKB/Swiss-Prot;Acc:Q9SLC3]	1.60986	0.0015545
AT3G50260	Ethylene-responsive transcription factor ERF011 [Source:UniProtKB/Swiss-Prot;Acc:Q9SNE1]	1.60783	0.00243967
AT1G03850	Glutaredoxin family protein [Source:TAIR;Acc:AT1G03850]	1.60558	0.00115364
AT3G26500	Plant intracellular Ras-group-related LRR protein 2 [Source:UniProtKB/Swiss-Prot;Acc:Q9LRV8]	1.60226	0.000530453
AT1G17745	D-3-phosphoglycerate dehydrogenase [Source:TAIR;Acc:AT1G17745]	1.59997	0.00233111
AT5G67450	ZF1 [Source:UniProtKB/TrEMBL;Acc:A0A178UTI6]	1.59737	0.000154195
AT1G13830	Carbohydrate-binding X8 domain superfamily protein [Source:TAIR;Acc:AT1G13830]	1.59272	0.000766561
AT1G21520	Uncharacterized protein At1g21520/F24J8_4 [Source:UniProtKB/TrEMBL;Acc:Q8GYE6]	1.59129	0.00146561
AT2G27690	Cytochrome P450 94C1 [Source:UniProtKB/Swiss-Prot;Acc:Q9ZUX1]	1.58899	0.000117876
AT5G01900	Uncharacterized protein At5g01900 (Fragment) [Source:UniProtKB/TrEMBL;Acc:C0SVM7]	1.58843	0.000898544
AT3G56400	Probable WRKY transcription factor 70 [Source:UniProtKB/Swiss-Prot;Acc:Q9LY00]	1.57672	0.000676828
AT5G42380	Calcium-binding protein CML37 [Source:UniProtKB/Swiss-Prot;Acc:Q9FIH9]	1.57626	0.00102406
AT3G48850	Mitochondrial phosphate carrier protein 2, mitochondrial [Source:UniProtKB/Swiss-Prot;Acc:Q9M2Z8]	1.56903	0.00187709
AT5G22545	Uncharacterized protein At5g22545 [Source:UniProtKB/TrEMBL;Acc:Q8GWC9]	1.56781	0.00101057
AT4G01700	At4g01700 [Source:UniProtKB/TrEMBL;Acc:Q9ZSI6]	1.56748	0.00069728
AT5G18470	Curculin-like (Mannose-binding) lectin family protein [Source:UniProtKB/TrEMBL;Acc:Q94K76]	1.56655	0.00155844
AT3G13433	Transmembrane protein [Source:UniProtKB/TrEMBL;Acc:F4JDB5]	1.56501	0.00128677
AT5G55420	#N/A	1.56258	0.00161281
AT3G48020	At3g48020 [Source:UniProtKB/TrEMBL;Acc:Q9SU65]	1.55944	0.000870156
AT5G03350	Lectin-like protein [Source:UniProtKB/Swiss-Prot;Acc:Q9LZF5]	1.55746	0.00112255
AT1G13470	Protein of unknown function (DUF1262) [Source:TAIR;Acc:AT1G13470]	1.55651	0.00079084
AT1G24145	At1g24145 [Source:UniProtKB/TrEMBL;Acc:Q8GYP2]	1.55092	0.00101062
AT1G35210	Uncharacterized protein T32G9.25 [Source:UniProtKB/TrEMBL;Acc:Q9C6F2]	1.54887	0.000355209
AT1G51800	LRR receptor-like serine/threonine-protein kinase IOS1 [Source:UniProtKB/Swiss-Prot;Acc:Q9C8I6]	1.54423	0.00147736
AT3G13790	Beta-fructofuranosidase, insoluble isoenzyme CWINV1 [Source:UniProtKB/Swiss-Prot;Acc:Q43866]	1.54235	0.00108442
AT5G55450	Bifunctional inhibitor/lipid-transfer protein/seed storage 2S albumin superfamily protein [Source:UniProtKB/TrEMBL;Acc:Q9FJ65]	1.5389	0.00166811
AT4G02520	Glutathione S-transferase F2 [Source:UniProtKB/Swiss-Prot;Acc:P46422]	1.53602	0.000849646
AT1G53625	At1g53625 [Source:UniProtKB/TrEMBL;Acc:Q9LPH9]	1.53555	0.00212867
AT5G47850	Serine/threonine-protein kinase-like protein CCR4 [Source:UniProtKB/Swiss-Prot;Acc:Q9FIJ6]	1.53316	0.000352255
AT1G66090	Disease resistance protein (TIR-NBS class) [Source:UniProtKB/TrEMBL;Acc:Q9C515]	1.53112	0.000330926
AT5G42830	HXXXD-type acyl-transferase family protein [Source:UniProtKB/TrEMBL;Acc:Q9FMN6]	1.52701	0.00113976
AT1G22990	HIPP22 [Source:UniProtKB/TrEMBL;Acc:A0A178WF89]	1.52475	0.00169168
AT3G27210	Uncharacterized protein At3g27210 [Source:UniProtKB/Swiss-Prot;Acc:Q9LK32]	1.52403	0.00138056
AT3G11340	UDP-glycosyltransferase 76B1 [Source:UniProtKB/Swiss-Prot;Acc:Q9C768]	1.52305	0.0027435
AT1G52890	NAC domain-containing protein 19 [Source:UniProtKB/Swiss-Prot;Acc:Q9C932]	1.52117	0.00454743
AT4G39030	Protein DETOXIFICATION 47, chloroplastic [Source:UniProtKB/Swiss-Prot;Acc:Q945F0]	1.52063	0.00165478
AT4G05540	P-loop containing nucleoside triphosphate hydrolases superfamily protein [Source:UniProtKB/TrEMBL;Acc:F4JGH5]	1.52018	0.000581633
AT2G40750	Probable WRKY transcription factor 54 [Source:UniProtKB/Swiss-Prot;Acc:Q93WU8]	1.51534	0.000931155
AT3G61190	BON1-associated protein 1 [Source:UniProtKB/Swiss-Prot;Acc:Q941L2]	1.51321	0.00104646
AT5G10695	Methionyl-tRNA synthetase [Source:UniProtKB/TrEMBL;Acc:Q8RXY3]	1.51246	0.00088365
AT1G32960	Subtilisin-like protease SBT3.3 [Source:UniProtKB/Swiss-Prot;Acc:Q9MAP5]	1.51078	0.00119675
AT3G13610	Feruloyl CoA ortho-hydroxylase 1 [Source:UniProtKB/Swiss-Prot;Acc:Q9LHN8]	1.51013	0.00332978
AT4G23610	AT4g23610/F9D16_80 [Source:UniProtKB/TrEMBL;Acc:Q9SUR5]	1.50971	0.00185164
AT5G44460	Probable calcium-binding protein CML43 [Source:UniProtKB/Swiss-Prot;Acc:Q9FI19]	1.50941	0.00144217
AT5G39670	Probable calcium-binding protein CML46 [Source:UniProtKB/Swiss-Prot;Acc:Q93Z27]	1.5092	0.00152031
AT3G47050	Beta-D-glucan exohydrolase-like protein [Source:UniProtKB/TrEMBL;Acc:Q9SD68]	1.50874	0.000864726
AT4G37150	MES9 [Source:UniProtKB/TrEMBL;Acc:A0A178V387]	1.50735	0.00263433
AT4G20000	At4g20000 [Source:UniProtKB/TrEMBL;Acc:O49427]	1.50599	0.0011904
AT5G18270	NAC domain-containing protein 87 [Source:UniProtKB/Swiss-Prot;Acc:Q9FK44]	1.50368	0.00146131
AT1G66700	Paraxanthine methyltransferase 1 [Source:UniProtKB/Swiss-Prot;Acc:Q9C9M3]	1.50282	0.00194608
AT3G01290	HIR2 [Source:UniProtKB/TrEMBL;Acc:A0A178V7M0]	1.50054	0.000570324
AT5G17760	AAA-ATPase At5g17760 [Source:UniProtKB/Swiss-Prot;Acc:Q9FN75]	1.49933	0.00113112
AT1G79450	ALA-interacting subunit 5 [Source:UniProtKB/Swiss-Prot;Acc:Q8L8W0]	1.49931	0.00141582
AT4G23310	Putative cysteine-rich receptor-like protein kinase 23 [Source:UniProtKB/Swiss-Prot;Acc:O65482]	1.49507	0.00175034
AT5G44575	At5g44575 [Source:UniProtKB/TrEMBL;Acc:Q8GWN6]	1.49476	0.00131716
AT5G17330	Glutamate decarboxylase 1 [Source:UniProtKB/Swiss-Prot;Acc:Q42521]	1.49333	0.00110271
AT1G80840	Probable WRKY transcription factor 40 [Source:UniProtKB/Swiss-Prot;Acc:Q9SAH7]	1.49227	0.000668924
AT1G28370	ERF domain protein 11 [Source:TAIR;Acc:AT1G28370]	1.48831	0.000107435
AT3G50280	Uncharacterized acetyltransferase At3g50280 [Source:UniProtKB/Swiss-Prot;Acc:Q9SND9]	1.4883	0.00179547
AT4G14365	Putative E3 ubiquitin-protein ligase XBAT34 [Source:UniProtKB/Swiss-Prot;Acc:Q9FPH0]	1.4849	0.000951107
AT5G25260	Flotillin-like protein 2 [Source:UniProtKB/Swiss-Prot;Acc:Q4V3D6]	1.47888	0.0014227
AT3G10815	Putative RING zinc finger protein [Source:UniProtKB/TrEMBL;Acc:Q8L729]	1.47877	0.00116742
AT1G19020	CDP-diacylglycerol-glycerol-3-phosphate 3-phosphatidyltransferase [Source:UniProtKB/TrEMBL;Acc:Q8VYY6]	1.47502	0.000667202
AT1G51620	Protein kinase superfamily protein [Source:UniProtKB/TrEMBL;Acc:Q9C8H4]	1.47495	0.00113153
AT4G25070	Caldesmon-like protein [Source:UniProtKB/TrEMBL;Acc:A0MFT2]	1.46888	0.00095498
AT2G29110	Glutamate receptor [Source:UniProtKB/TrEMBL;Acc:A0A178VW76]	1.46596	0.000612208
AT1G05300	Zinc transporter 5 [Source:UniProtKB/Swiss-Prot;Acc:O23039]	1.46465	0.00287583
AT4G37010	Centrin 2 [Source:UniProtKB/TrEMBL;Acc:B6EUB9]	1.45851	0.00115837
ATMG01130	Uncharacterized mitochondrial protein AtMg01130 [Source:UniProtKB/Swiss-Prot;Acc:P92544]	1.456	0.00210714
AT3G01830	Probable calcium-binding protein CML40 [Source:UniProtKB/Swiss-Prot;Acc:Q9SGI8]	1.45114	0.00130449
AT3G21520	Protein DMP1 [Source:UniProtKB/Swiss-Prot;Acc:Q9LVF4]	1.44784	0.00145886
AT5G58620	Zinc finger CCCH domain-containing protein 66 [Source:UniProtKB/Swiss-Prot;Acc:Q9LUZ4]	1.4467	0.00052463
AT3G15536	#N/A	1.44484	0.00305121
AT2G24850	Probable aminotransferase TAT3 [Source:UniProtKB/Swiss-Prot;Acc:Q9SK47]	1.44385	0.00142712
AT1G26200	TRAM, LAG1 and CLN8 (TLC) lipid-sensing domain containing protein [Source:TAIR;Acc:AT1G26200]	1.44143	0.00188388
AT4G11000	Ankyrin repeat family protein [Source:TAIR;Acc:AT4G11000]	1.44047	0.000308355
AT2G46150	Late embryogenesis abundant (LEA) hydroxyproline-rich glycoprotein family [Source:UniProtKB/TrEMBL;Acc:O82354]	1.43761	0.00190207
AT3G57950	At3g57950 [Source:UniProtKB/TrEMBL;Acc:Q9M2Q3]	1.43752	0.00151294
AT2G41380	At2g41380 [Source:UniProtKB/TrEMBL;Acc:Q9ZVC3]	1.4375	0.00208607
AT5G20960	Indole-3-acetaldehyde oxidase [Source:UniProtKB/Swiss-Prot;Acc:Q7G193]	1.42869	0.00173944
AT1G79680	Wall-associated receptor kinase-like 10 [Source:UniProtKB/Swiss-Prot;Acc:Q8VYA3]	1.42245	0.000523551
AT1G72060	Serine-type endopeptidase inhibitor [Source:UniProtKB/TrEMBL;Acc:Q9C7G9]	1.42002	0.00104702
AT3G09270	Glutathione S-transferase U8 [Source:UniProtKB/Swiss-Prot;Acc:Q9SR36]	1.41946	0.00282282
AT3G54150	Embryonic abundant protein-like [Source:UniProtKB/TrEMBL;Acc:Q9M389]	1.41382	0.00106658
AT5G62480	Glutathione S-transferase U9 [Source:UniProtKB/Swiss-Prot;Acc:Q9FUT0]	1.4124	0.00133232
AT5G22540	At5g22540 [Source:UniProtKB/TrEMBL;Acc:Q9FK85]	1.40951	0.000675102
AT4G26120	Ankyrin repeat family protein / BTB/POZ domain-containing protein [Source:TAIR;Acc:AT4G26120]	1.40896	0.0016411
AT5G65090	Type I inositol polyphosphate 5-phosphatase 5 [Source:UniProtKB/Swiss-Prot;Acc:Q66GQ6]	1.40445	0.0014013
AT5G57220	Cytochrome P450 81F2 [Source:UniProtKB/Swiss-Prot;Acc:Q9LVD6]	1.40251	0.0012954
AT1G65845	At1g65844 [Source:UniProtKB/TrEMBL;Acc:Q9SHX3]	1.39708	0.000850381
AT2G26440	Probable pectinesterase/pectinesterase inhibitor 12 [Source:UniProtKB/Swiss-Prot;Acc:O48711]	1.396	0.000831238
AT5G08790	Protein ATAF2 [Source:UniProtKB/Swiss-Prot;Acc:Q9C598]	1.39581	0.00154905
AT1G27730	Zinc finger protein ZAT10 [Source:UniProtKB/Swiss-Prot;Acc:Q96289]	1.39572	0.00108669
AT4G23215	#N/A	1.39534	0.00185912
AT2G14560	Protein of unknown function (DUF567) [Source:TAIR;Acc:AT2G14560]	1.39474	0.000905036
AT1G57560	At1g57560 [Source:UniProtKB/TrEMBL;Acc:Q9C695]	1.39415	0.00172261
AT4G33050	calmodulin-binding family protein [Source:TAIR;Acc:AT4G33050]	1.39115	0.0013568
AT5G23160	Uncharacterized protein At5g23160 [Source:UniProtKB/Swiss-Prot;Acc:Q9FMY4]	1.3882	0.00111589
AT1G72520	Lipoxygenase 4, chloroplastic [Source:UniProtKB/Swiss-Prot;Acc:Q9FNX8]	1.38505	0.000197216
AT1G14870	PCR2 [Source:UniProtKB/TrEMBL;Acc:A0A178WDU8]	1.3844	0.00357916
AT2G28500	LOB domain-containing protein 11 [Source:UniProtKB/Swiss-Prot;Acc:Q9SK08]	1.38374	0.000536225
AT2G32140	Transmembrane receptor [Source:UniProtKB/TrEMBL;Acc:F4ISS7]	1.38305	0.00125062
AT2G20142	Toll-Interleukin-Resistance (TIR) domain family protein [Source:UniProtKB/TrEMBL;Acc:F4IUF0]	1.37979	0.000985152
AT5G49280	At5g49280 [Source:UniProtKB/TrEMBL;Acc:Q9FJ12]	1.37228	0.00194677
AT1G08050	T6D22.13 [Source:UniProtKB/TrEMBL;Acc:Q9LN03]	1.37134	0.00147524
AT1G43910	AAA-ATPase At1g43910 [Source:UniProtKB/Swiss-Prot;Acc:Q9LP11]	1.37115	0.00254663
AT3G10320	F14P13.8 protein [Source:UniProtKB/TrEMBL;Acc:Q9SS43]	1.36804	0.00276829
AT3G26470	Powdery mildew resistance protein, RPW8 domain-containing protein [Source:UniProtKB/TrEMBL;Acc:Q9LIM8]	1.36792	0.00279013
AT1G14880	Protein PLANT CADMIUM RESISTANCE 1 [Source:UniProtKB/Swiss-Prot;Acc:Q9LQU2]	1.36504	0.0019452
AT3G25010	Receptor like protein 41 [Source:UniProtKB/TrEMBL;Acc:A0A1I9LTP5]	1.36357	0.00278753
AT1G01560	Mitogen-activated protein kinase 11 [Source:UniProtKB/Swiss-Prot;Acc:Q9LMM5]	1.36135	0.00140616
AT1G14080	Fucosyltransferase 6 [Source:UniProtKB/Swiss-Prot;Acc:Q9XI80]	1.35652	0.00199429
AT5G52750	Heavy metal-associated isoprenylated plant protein 13 [Source:UniProtKB/Swiss-Prot;Acc:Q9LTE2]	1.35214	0.00130088
AT2G25000	Probable WRKY transcription factor 60 [Source:UniProtKB/Swiss-Prot;Acc:Q9SK33]	1.3519	0.00117988
AT3G44300	NIT2 [Source:UniProtKB/TrEMBL;Acc:A0A384LD03]	1.3493	0.00454201
AT1G02470	Polyketide cyclase/dehydrase and lipid transport superfamily protein [Source:UniProtKB/TrEMBL;Acc:F4HXI8]	1.34807	0.00268246
AT3G50800	Uncharacterized protein At3g50800 [Source:UniProtKB/TrEMBL;Acc:Q9SVL8]	1.34301	0.00119594
AT5G37600	Glutamine synthetase cytosolic isozyme 1-1 [Source:UniProtKB/Swiss-Prot;Acc:Q56WN1]	1.34279	0.00222175
AT4G14450	Uncharacterized protein At4g14450, chloroplastic [Source:UniProtKB/Swiss-Prot;Acc:Q6NN02]	1.34247	0.00181533
AT1G62300	Uncharacterized protein At1g62300 (Fragment) [Source:UniProtKB/TrEMBL;Acc:C0SV11]	1.33941	0.00257491
AT5G46230	At5g46230 [Source:UniProtKB/TrEMBL;Acc:Q9FL37]	1.33895	0.00122165
AT5G10760	Aspartyl protease AED1 [Source:UniProtKB/Swiss-Prot;Acc:Q9LEW3]	1.33851	0.00348805
AT1G07900	LBD1 [Source:UniProtKB/TrEMBL;Acc:A0A178WM56]	1.33822	0.00371061
AT5G44990	Glutathione S-transferase family protein [Source:UniProtKB/TrEMBL;Acc:Q9FL98]	1.33358	0.00311243
AT1G67520	lectin protein kinase family protein [Source:TAIR;Acc:AT1G67520]	1.33159	0.00134977
AT2G22500	Mitochondrial uncoupling protein 5 [Source:UniProtKB/Swiss-Prot;Acc:Q9SJY5]	1.32856	0.00075405
AT1G24140	Metalloendoproteinase 3-MMP [Source:UniProtKB/Swiss-Prot;Acc:Q5XF51]	1.32243	0.000245599
AT2G02810	UDP-galactose/UDP-glucose transporter 1 [Source:UniProtKB/Swiss-Prot;Acc:O64503]	1.31966	0.0030663
AT1G67856	RING/U-box superfamily protein [Source:UniProtKB/TrEMBL;Acc:B3H543]	1.3183	0.00172988
AT5G60950	COBRA-like protein 5 [Source:UniProtKB/Swiss-Prot;Acc:Q9FME5]	1.31611	0.00135392
AT2G41100	Calmodulin-like protein 12 [Source:UniProtKB/Swiss-Prot;Acc:P25071]	1.31471	0.00110228
AT3G04070	NAC transcription factor 47 [Source:UniProtKB/Swiss-Prot;Acc:Q84TD6]	1.314	0.00222271
AT5G45000	Disease resistance protein (TIR-NBS-LRR class) family [Source:UniProtKB/TrEMBL;Acc:Q56XU3]	1.31027	0.00160062
AT1G75040	Pathogenesis-related protein 5 [Source:UniProtKB/Swiss-Prot;Acc:P28493]	1.30781	0.00604227
AT1G77380	ATAAP3 [Source:UniProtKB/TrEMBL;Acc:A0A178W3U1]	1.30678	0.00265723
AT2G42350	RING-H2 finger protein ATL40 [Source:UniProtKB/Swiss-Prot;Acc:Q9SLC4]	1.30579	0.00208814
AT2G02930	Glutathione S-transferase F3 [Source:UniProtKB/Swiss-Prot;Acc:Q9SLM6]	1.30062	0.000547596
AT5G25820	Exostosin family protein [Source:UniProtKB/TrEMBL;Acc:Q0WPG1]	1.29545	0.00184206
AT3G25600	Probable calcium-binding protein CML16 [Source:UniProtKB/Swiss-Prot;Acc:Q9LI84]	1.29492	0.000881517
AT2G29720	FAD/NAD(P)-binding oxidoreductase family protein [Source:UniProtKB/TrEMBL;Acc:O82384]	1.29456	0.002004
AT3G49120	Peroxidase 34 [Source:UniProtKB/Swiss-Prot;Acc:Q9SMU8]	1.29165	0.00160993
AT5G02780	Glutathione S-transferase L1 [Source:UniProtKB/Swiss-Prot;Acc:Q6NLB0]	1.28178	0.00354921
AT1G15670	F-box/kelch-repeat protein At1g15670 [Source:UniProtKB/Swiss-Prot;Acc:Q9LMR5]	1.27813	0.000256626
AT3G28890	Receptor-like protein 43 [Source:UniProtKB/Swiss-Prot;Acc:Q9LJW7]	1.27496	0.0012858
AT5G13220	jasmonate-zim-domain protein 10 [Source:TAIR;Acc:AT5G13220]	1.26997	0.000624809
AT2G34600	Protein TIFY 5B [Source:UniProtKB/Swiss-Prot;Acc:O64687]	1.26971	0.00167517
AT4G21850	MSRB9 [Source:UniProtKB/TrEMBL;Acc:A0A178V287]	1.2671	0.00355953
AT5G02490	Probable mediator of RNA polymerase II transcription subunit 37c [Source:UniProtKB/Swiss-Prot;Acc:P22954]	1.26502	0.00248941
AT1G64170	Cation/H(+) antiporter 16 [Source:UniProtKB/Swiss-Prot;Acc:Q1HDT3]	1.26408	0.00234467
AT5G22520	At5g22520 [Source:UniProtKB/TrEMBL;Acc:Q9FK87]	1.26353	0.00206886
AT3G52400	Syntaxin-122 [Source:UniProtKB/Swiss-Prot;Acc:Q9SVC2]	1.26234	0.000747523
AT1G21525	#N/A	1.25844	0.00378996
AT1G44130	Eukaryotic aspartyl protease family protein [Source:UniProtKB/TrEMBL;Acc:Q9C6Y5]	1.25638	0.00350688
AT5G48290	Heavy metal transport/detoxification superfamily protein [Source:TAIR;Acc:AT5G48290]	1.25361	0.0031484
AT3G21781	#N/A	1.25307	0.00337415
AT2G34940	VSR5 [Source:UniProtKB/TrEMBL;Acc:A0A384KPH5]	1.24807	0.00186391
AT3G07600	Heavy metal-associated isoprenylated plant protein 16 [Source:UniProtKB/Swiss-Prot;Acc:Q9SSF0]	1.24784	0.00181039
AT2G46400	Probable WRKY transcription factor 46 [Source:UniProtKB/Swiss-Prot;Acc:Q9SKD9]	1.24609	0.00253672
AT5G67340	U-box domain-containing protein 2 [Source:UniProtKB/Swiss-Prot;Acc:Q5XEZ8]	1.24464	0.00217285
--	#N/A	1.24435	0.000532269
AT5G13210	AT5g13210/T31B5_30 [Source:UniProtKB/TrEMBL;Acc:Q9LYV5]	1.24283	0.00337076
AT3G29000	Probable calcium-binding protein CML45 [Source:UniProtKB/Swiss-Prot;Acc:Q9MBG5]	1.24202	0.00121089
AT4G20110	VACUOLAR SORTING RECEPTOR 7 [Source:UniProtKB/TrEMBL;Acc:F4JUS0]	1.24202	0.00191684
AT1G33720	Cytochrome P450, family 76, subfamily C, polypeptide 6 [Source:UniProtKB/TrEMBL;Acc:Q9LQ25]	1.24114	0.00151124
AT4G24570	DIC2 [Source:UniProtKB/TrEMBL;Acc:A0A178URN9]	1.24093	0.00710394
AT3G60420	Phosphoglycerate mutase family protein [Source:UniProtKB/TrEMBL;Acc:F4JBT8]	1.23962	0.00358489
AT3G24900	Receptor like protein 39 [Source:UniProtKB/TrEMBL;Acc:A0A1I9LR86]	1.23438	0.0035868
AT5G48400	Glutamate receptor 1.2 [Source:UniProtKB/Swiss-Prot;Acc:Q9LV72]	1.23356	0.00413298
AT5G52540	Keratin-associated protein, putative (DUF819) [Source:UniProtKB/TrEMBL;Acc:Q9LTG3]	1.23119	0.00252969
AT4G39610	At4g39610 [Source:UniProtKB/TrEMBL;Acc:Q9SV97]	1.22792	0.003256
AT1G17380	Protein TIFY 11A [Source:UniProtKB/Swiss-Prot;Acc:Q9LDU5]	1.22562	0.000907578
AT2G02010	glutamate decarboxylase 4 [Source:TAIR;Acc:AT2G02010]	1.22554	0.00258756
AT1G01680	U-box domain-containing protein 54 [Source:UniProtKB/Swiss-Prot;Acc:Q9LQ92]	1.22528	0.00445367
AT4G04540	Putative cysteine-rich receptor-like protein kinase 39 [Source:UniProtKB/Swiss-Prot;Acc:Q9SYS7]	1.22349	0.00272554
AT1G03660	Ankyrin-repeat containing protein [Source:UniProtKB/TrEMBL;Acc:F4I2G0]	1.222	0.00442506
AT5G08380	Alpha-galactosidase 1 [Source:UniProtKB/Swiss-Prot;Acc:Q9FT97]	1.22119	0.00279535
AT5G16200	50S ribosomal protein-like protein [Source:UniProtKB/TrEMBL;Acc:Q9LF08]	1.22016	0.000957009
AT1G48320	DHNAT1 [Source:UniProtKB/TrEMBL;Acc:A0A178WIC5]	1.21992	0.00577512
AT1G21110	Indole glucosinolate O-methyltransferase 3 [Source:UniProtKB/Swiss-Prot;Acc:Q9LPU6]	1.21856	0.00213008
AT3G63010	Gibberellin receptor GID1B [Source:UniProtKB/Swiss-Prot;Acc:Q9LYC1]	1.21537	0.0053162
AT4G20320	CTP synthase [Source:UniProtKB/TrEMBL;Acc:Q0WRY1]	1.21488	0.00498805
AT3G28340	Hexosyltransferase (Fragment) [Source:UniProtKB/TrEMBL;Acc:W8QNM3]	1.21197	0.00119818
AT3G16565	Threonyl and alanyl tRNA synthetase second additional domain-containing protein [Source:UniProtKB/TrEMBL;Acc:A0A1I9LMV6]	1.21152	0.00172304
AT4G36950	Mitogen-activated protein kinase kinase kinase 21 [Source:UniProtKB/TrEMBL;Acc:Q6K1M3]	1.20968	0.00315238
AT4G12290	Amine oxidase [Source:UniProtKB/TrEMBL;Acc:Q8L742]	1.20928	0.00361148
AT1G65500	F5I14.4 protein [Source:UniProtKB/TrEMBL;Acc:O04468]	1.20728	0.00459276
AT4G30640	Putative F-box/LRR-repeat protein 19 [Source:UniProtKB/Swiss-Prot;Acc:Q9M096]	1.20554	0.00137686
AT5G35580	Protein kinase superfamily protein [Source:TAIR;Acc:AT5G35580]	1.20463	0.00195766
AT5G44585	unknown protein; FUNCTIONS IN: molecular_function unknown; INVOLVED IN: biological_process unknown; LOCATED IN: endomembrane system; Has 30201 Blast hits to 17322 proteins in 780 species: Archae - 12; Bacteria - 1396; Metazoa - 17338; Fungi - 3422; /.../ - 5037; Viruses - 0; Other Eukaryotes - 2996 (source: NCBI BLink). [Source:TAIR;Acc:AT5G44585]	1.20339	0.00768691
AT5G01542	#N/A	1.19918	0.0037152
AT3G57260	Beta-1,3-glucanase 2 [Source:UniProtKB/TrEMBL;Acc:A0A1I9LMG6]	1.19832	0.00695843
AT3G02840	ARM repeat superfamily protein [Source:UniProtKB/TrEMBL;Acc:Q9M8S5]	1.19725	0.00252797
AT3G09940	Monodehydroascorbate reductase 3 [Source:UniProtKB/Swiss-Prot;Acc:Q9SR59]	1.19724	0.00314547
AT4G38560	Phospholipase like protein [Source:UniProtKB/TrEMBL;Acc:Q0WV01]	1.19622	0.00260747
AT3G22600	AT3g22600/F16J14_17 [Source:UniProtKB/TrEMBL;Acc:Q9LJ86]	1.19503	0.00491021
AT1G12420	ACT domain-containing protein ACR8 [Source:UniProtKB/Swiss-Prot;Acc:Q9LNA5]	1.19354	0.00227382
AT4G36990	Heat stress transcription factor B-1 [Source:UniProtKB/Swiss-Prot;Acc:Q96320]	1.19299	0.00314583
AT5G26690	Heavy metal-associated isoprenylated plant protein 2 [Source:UniProtKB/Swiss-Prot;Acc:Q8GWS3]	1.19214	0.00377445
ATCG01020	50S ribosomal protein L32, chloroplastic [Source:UniProtKB/Swiss-Prot;Acc:P61847]	1.1918	0.00853569
AT3G57450	At3g57450 [Source:UniProtKB/TrEMBL;Acc:Q9SCM7]	1.1906	0.000586451
AT1G23840	At1g23840/F5O8_37 [Source:UniProtKB/TrEMBL;Acc:Q9ZUB1]	1.19014	0.00173348
AT1G66600	Probable WRKY transcription factor 63 [Source:UniProtKB/Swiss-Prot;Acc:Q9C6H5]	1.18921	0.00478294
AT5G59820	Zinc finger protein ZAT12 [Source:UniProtKB/Swiss-Prot;Acc:Q42410]	1.18788	0.00126677
AT5G06320	NHL3 [Source:UniProtKB/TrEMBL;Acc:A0A178UB58]	1.18553	0.00151035
AT3G50480	RPW8-like protein 4 [Source:UniProtKB/Swiss-Prot;Acc:Q9SCS6]	1.18473	0.00273219
AT4G39580	F-box/kelch-repeat protein At4g39580 [Source:UniProtKB/Swiss-Prot;Acc:Q9SVA0]	1.17925	0.00232341
AT4G03450	Ankyrin repeat family protein [Source:UniProtKB/TrEMBL;Acc:Q9ZT73]	1.17905	0.00275756
AT4G11890	Protein kinase superfamily protein [Source:UniProtKB/TrEMBL;Acc:F4JPT7]	1.17895	0.00362578
AT2G21850	Cysteine/Histidine-rich C1 domain family protein [Source:UniProtKB/TrEMBL;Acc:F4III1]	1.17843	0.00301751
AT5G45090	Uncharacterized protein PHLOEM PROTEIN 2-LIKE A7 [Source:UniProtKB/Swiss-Prot;Acc:Q9FHE5]	1.17775	0.00126226
AT5G41750	Disease resistance protein (TIR-NBS-LRR class) family [Source:UniProtKB/TrEMBL;Acc:Q9LSX5]	1.17662	0.00154101
AT4G23150		1.1749	0.00580246
AT1G16420	Metacaspase-8 [Source:UniProtKB/Swiss-Prot;Acc:Q9SA41]	1.1699	0.00386708
AT5G40240	WAT1-related protein [Source:UniProtKB/TrEMBL;Acc:F4KHA9]	1.16914	0.00250133
AT3G07195	RPM1-interacting protein 4 (RIN4) family protein [Source:UniProtKB/TrEMBL;Acc:A0A1I9LSZ8]	1.16887	0.00130535
AT1G48605	Probable phosphopantothenoylcysteine decarboxylase [Source:UniProtKB/Swiss-Prot;Acc:P94063]	1.16778	0.0012318
AT5G01100	FRB1 [Source:UniProtKB/TrEMBL;Acc:A0A178U817]	1.1662	0.00204548
AT3G22910	Putative calcium-transporting ATPase 13, plasma membrane-type [Source:UniProtKB/Swiss-Prot;Acc:Q9LIK7]	1.16543	0.00769455
AT3G22160	VQ motif-containing protein 22 [Source:UniProtKB/Swiss-Prot;Acc:Q9LIE6]	1.16362	0.00544117
AT1G67000	LEAF RUST 10 DISEASE-RESISTANCE LOCUS RECEPTOR-LIKE PROTEIN KINASE-like 2.8 [Source:UniProtKB/Swiss-Prot;Acc:Q3ECH2]	1.16332	0.00149666
AT5G11210	Glutamate receptor 2.5 [Source:UniProtKB/Swiss-Prot;Acc:Q9LFN5]	1.163	0.00515125
AT3G51860	Vacuolar cation/proton exchanger [Source:UniProtKB/TrEMBL;Acc:A0A1I9LSS9]	1.16162	0.00464093
AT1G72070	Chaperone DnaJ-domain superfamily protein [Source:UniProtKB/TrEMBL;Acc:F4IBN6]	1.15695	0.00258461
AT2G22860	Phytosulfokines 2 [Source:UniProtKB/Swiss-Prot;Acc:O81003]	1.15655	0.0023872
AT2G01021	unknown protein; Has 30201 Blast hits to 17322 proteins in 780 species: Archae - 12; Bacteria - 1396; Metazoa - 17338; Fungi - 3422; Plants - 5037; Viruses - 0; Other Eukaryotes - 2996 (source: NCBI BLink). [Source:TAIR;Acc:AT2G01021]	1.15571	0.004631
AT1G02360	Chitinase family protein [Source:TAIR;Acc:AT1G02360]	1.15266	0.00370789
AT1G55790	Domain of unknown function (DUF2431) [Source:TAIR;Acc:AT1G55790]	1.15195	0.0061623
AT4G10500	Protein DMR6-LIKE OXYGENASE 1 [Source:UniProtKB/Swiss-Prot;Acc:Q9ZSA8]	1.1518	0.00659628
AT5G50200	High-affinity nitrate transporter 3.1 [Source:UniProtKB/Swiss-Prot;Acc:Q9FGS5]	1.14942	0.00243705
AT5G08760	unknown protein; FUNCTIONS IN: molecular_function unknown; INVOLVED IN: biological_process unknown; LOCATED IN: endomembrane system; Has 3 Blast hits to 3 proteins in 2 species: Archae - 0; Bacteria - 0; Metazoa - 0; Fungi - 0; Plants - 3; Viruses - /.../her Eukaryotes - 0 (source: NCBI BLink). [Source:TAIR;Acc:AT5G08760]	1.14769	0.00317714
AT5G52740	Heavy metal-associated isoprenylated plant protein 12 [Source:UniProtKB/Swiss-Prot;Acc:Q9LTE3]	1.14708	0.00206973
AT2G28110	Glycosyltransferase (Fragment) [Source:UniProtKB/TrEMBL;Acc:W8Q712]	1.14699	0.00257884
AT1G56060	unknown protein; BEST Arabidopsis thaliana protein match is: unknown protein (TAIR:AT2G32210.1); Has 180 Blast hits to 180 proteins in 22 species: Archae - 0; Bacteria - 0; Metazoa - 0; Fungi - 10; Plants - 170; Viruses - 0; Other Eukaryotes - 0 (so /.../NCBI BLink). [Source:TAIR;Acc:AT1G56060]	1.14675	0.0076931
AT1G07000	Exocyst subunit Exo70 family protein [Source:UniProtKB/TrEMBL;Acc:A0A178WCB5]	1.1463	0.000460268
AT3G13380	Receptor-like protein kinase BRI1-like 3 [Source:UniProtKB/Swiss-Prot;Acc:Q9LJF3]	1.14533	0.00377095
AT1G32350	AOX1D [Source:UniProtKB/TrEMBL;Acc:A0A384LFI3]	1.14504	0.00735534
AT1G33840	Protein of unknown function (DUF567) [Source:TAIR;Acc:AT1G33840]	1.14336	0.00483038
AT1G67810	SufE-like protein 2, chloroplastic [Source:UniProtKB/Swiss-Prot;Acc:Q9FXE3]	1.14201	0.00690232
AT5G51570	Hypersensitive-induced response protein 4 [Source:UniProtKB/Swiss-Prot;Acc:Q9FHM7]	1.13931	0.00345027
AT5G13320	Auxin-responsive GH3 family protein [Source:TAIR;Acc:AT5G13320]	1.13876	0.00431773
AT1G76930	extensin 4 [Source:TAIR;Acc:AT1G76930]	1.13785	0.00180498
AT1G14170	F7A19.25 protein [Source:UniProtKB/TrEMBL;Acc:Q9XI71]	1.13752	0.00420278
AT1G65610	Endoglucanase 7 [Source:UniProtKB/Swiss-Prot;Acc:O04478]	1.13671	0.00573706
AT5G07780	Formin-like protein 19 [Source:UniProtKB/Swiss-Prot;Acc:Q9FF14]	1.13628	0.00322615
AT5G40230	WAT1-related protein At5g40230 [Source:UniProtKB/Swiss-Prot;Acc:F4KHA8]	1.1362	0.00399323
AT2G25510	Expressed protein [Source:UniProtKB/TrEMBL;Acc:Q8S8H2]	1.13391	0.00261132
AT5G64310	Classical arabinogalactan protein 1 [Source:UniProtKB/Swiss-Prot;Acc:Q8LCN5]	1.13192	0.00185062
AT4G39366	#N/A	1.13053	0.00013232
AT1G33560	Disease resistance protein ADR1 [Source:UniProtKB/Swiss-Prot;Acc:Q9FW44]	1.13048	0.00318689
AT2G30770	Indoleacetaldoxime dehydratase [Source:UniProtKB/Swiss-Prot;Acc:O49342]	1.12554	0.0101517
AT4G39670	ACD11 homolog protein [Source:UniProtKB/Swiss-Prot;Acc:Q8L7U7]	1.12547	0.00642948
AT4G14370	Disease resistance protein (TIR-NBS-LRR class) family [Source:TAIR;Acc:AT4G14370]	1.12495	0.00291111
AT1G47890		1.12464	0.00664817
AT1G18910	Zinc finger protein BRUTUS-like At1g18910 [Source:UniProtKB/Swiss-Prot;Acc:F4IDY5]	1.12281	0.00288095
AT3G23240	Ethylene-responsive transcription factor 1B [Source:UniProtKB/Swiss-Prot;Acc:Q8LDC8]	1.12078	0.00315822
AT5G24110	Probable WRKY transcription factor 30 [Source:UniProtKB/Swiss-Prot;Acc:Q9FL62]	1.11874	0.00513122
AT4G25845	Oxysterol-binding 4B-like protein [Source:UniProtKB/TrEMBL;Acc:Q2V3E8]	1.11739	0.00613024
AT4G25110	Metacaspase-2 [Source:UniProtKB/Swiss-Prot;Acc:Q7XJE5]	1.11682	0.0020983
AT2G38470	WRKY33 [Source:UniProtKB/TrEMBL;Acc:A0A384L4W4]	1.11553	0.0010972
AT4G04500	Cysteine-rich receptor-like protein kinase 37 [Source:UniProtKB/Swiss-Prot;Acc:Q9XEC7]	1.11507	0.00695918
AT1G73260	Kunitz trypsin inhibitor 1 [Source:UniProtKB/Swiss-Prot;Acc:Q8RXD5]	1.11396	0.010669
AT3G05650	Receptor-like protein 32 [Source:UniProtKB/Swiss-Prot;Acc:Q9M9X0]	1.11346	0.00500481
AT3G11650	NDR1/HIN1-like protein 2 [Source:UniProtKB/Swiss-Prot;Acc:Q9SRN1]	1.11297	0.00155117
AT1G72910	Similar to part of disease resistance protein [Source:UniProtKB/TrEMBL;Acc:Q9SSN5]	1.11068	0.00254111
AT3G29644	#N/A	1.10928	0.000431432
AT4G11370	Probable E3 ubiquitin-protein ligase RHA1A [Source:UniProtKB/Swiss-Prot;Acc:Q9SUS4]	1.10863	0.00575276
AT1G30220	Probable inositol transporter 2 [Source:UniProtKB/Swiss-Prot;Acc:Q9C757]	1.10862	0.00289777
AT5G61250	GUS1 [Source:UniProtKB/TrEMBL;Acc:A0A384LHC0]	1.10844	0.00276569
AT2G27310	F-box protein At2g27310 [Source:UniProtKB/Swiss-Prot;Acc:Q9XIN8]	1.10684	0.00390354
AT2G14620	Probable xyloglucan endotransglucosylase/hydrolase protein 10 [Source:UniProtKB/Swiss-Prot;Acc:Q9ZVK1]	1.10662	0.00634105
ATMG00030	Uncharacterized mitochondrial protein AtMg00030 [Source:UniProtKB/Swiss-Prot;Acc:P93276]	1.10432	0.0102824
AT1G21250	Wall-associated receptor kinase 1 [Source:UniProtKB/Swiss-Prot;Acc:Q39191]	1.10362	0.00251515
AT1G76650	CML38 [Source:UniProtKB/TrEMBL;Acc:A0A178WMC5]	1.10332	0.00228466
AT1G75170	Sec14p-like phosphatidylinositol transfer family protein [Source:UniProtKB/TrEMBL;Acc:Q9FRK8]	1.10299	0.00531431
AT1G59590	At1g59590 [Source:UniProtKB/TrEMBL;Acc:Q9SLT9]	1.1002	0.00336507
AT5G55560	Probable serine/threonine-protein kinase WNK11 [Source:UniProtKB/Swiss-Prot;Acc:Q6ICW6]	1.0993	0.00247818
AT3G47780	ABC transporter A family member 7 [Source:UniProtKB/Swiss-Prot;Acc:Q9STT5]	1.09802	0.00461935
AT3G60450	Phosphoglycerate mutase family protein [Source:UniProtKB/TrEMBL;Acc:A0A1I9LN21]	1.09459	0.00442648
AT4G04490	Cysteine-rich receptor-like protein kinase 36 [Source:UniProtKB/Swiss-Prot;Acc:Q9XEC6]	1.09214	0.00577518
AT3G04010	At3g04010 [Source:UniProtKB/TrEMBL;Acc:Q9SQR1]	1.09172	0.00502064
AT2G44290	Protein YLS3 [Source:UniProtKB/Swiss-Prot;Acc:O64864]	1.09164	0.00465715
AT1G15520	ABC transporter G family member 40 [Source:UniProtKB/Swiss-Prot;Acc:Q9M9E1]	1.09102	0.00899218
AT4G26270	ATP-dependent 6-phosphofructokinase 3 [Source:UniProtKB/Swiss-Prot;Acc:Q94AA4]	1.08817	0.00240503
AT1G77510	Protein disulfide isomerase-like 1-2 [Source:UniProtKB/Swiss-Prot;Acc:Q9SRG3]	1.08739	0.00532468
AT3G54960	PDIL1-3 [Source:UniProtKB/TrEMBL;Acc:A0A178VF09]	1.08682	0.00495933
AT3G60540	Protein transport protein Sec61 subunit beta [Source:UniProtKB/TrEMBL;Acc:Q9M206]	1.08203	0.00667674
AT5G41400	Putative RING zinc finger protein [Source:UniProtKB/TrEMBL;Acc:Q9FN60]	1.08018	0.0111925
AT3G13100	ABC transporter C family member 7 [Source:UniProtKB/Swiss-Prot;Acc:Q9LK62]	1.07851	0.00647945
AT2G04070	Protein DETOXIFICATION 4 [Source:UniProtKB/Swiss-Prot;Acc:Q9SIA3]	1.07843	0.0043309
AT5G63990	Probable SAL3 phosphatase [Source:UniProtKB/Swiss-Prot;Acc:Q8GY63]	1.0762	0.00967167
AT4G19810	Class V chitinase [Source:UniProtKB/Swiss-Prot;Acc:O81862]	1.07602	0.00526933
AT1G25400	At1g25400 [Source:UniProtKB/TrEMBL;Acc:Q9C6L0]	1.07423	0.00248326
AT1G04990	Zinc finger CCCH domain-containing protein 3 [Source:UniProtKB/Swiss-Prot;Acc:Q94AD9]	1.07099	0.0073335
AT3G55910	ADP-ribosylation factor GTPase-activating protein [Source:UniProtKB/TrEMBL;Acc:Q9LY54]	1.0705	0.00219565
AT1G72240	Uncharacterized protein T9N14.5 [Source:UniProtKB/TrEMBL;Acc:Q9C7T1]	1.06883	0.0101267
AT1G61420	S-locus lectin protein kinase family protein [Source:TAIR;Acc:AT1G61420]	1.06203	0.00372509
AT2G33080		1.05973	0.00804693
AT5G08240	At5g08240 [Source:UniProtKB/TrEMBL;Acc:Q9LEY3]	1.05913	0.00366542
AT5G52720	Copper transport protein family [Source:TAIR;Acc:AT5G52720]	1.05897	0.00571959
AT1G56120	Leucine-rich repeat transmembrane protein kinase [Source:UniProtKB/TrEMBL;Acc:F4I3K0]	1.05675	0.00247982
AT2G24600	Ankyrin repeat family protein [Source:UniProtKB/TrEMBL;Acc:F4IPR3]	1.05665	0.00131102
AT3G53650	Histone H2B.8 [Source:UniProtKB/Swiss-Prot;Acc:Q9LFF6]	1.05583	0.00533857
AT3G55450	PBS1-like 1 [Source:UniProtKB/TrEMBL;Acc:F4IWV6]	1.05552	0.00614628
AT5G12340	DUF4228 domain protein [Source:UniProtKB/TrEMBL;Acc:Q1PDX4]	1.05406	0.00553968
AT4G27860	vacuolar iron transporter (VIT) family protein [Source:TAIR;Acc:AT4G27860]	1.05365	0.00295056
AT3G44326	F-box protein At3g44326 [Source:UniProtKB/Swiss-Prot;Acc:Q2V3R1]	1.05357	0.00414262
AT1G09080	Probable mediator of RNA polymerase II transcription subunit 37b [Source:UniProtKB/Swiss-Prot;Acc:Q8H1B3]	1.05092	0.0065477
AT4G18990	Probable xyloglucan endotransglucosylase/hydrolase protein 29 [Source:UniProtKB/Swiss-Prot;Acc:Q8L7H3]	1.05081	0.00385214
AT4G05030	AT4g05030 protein [Source:UniProtKB/TrEMBL;Acc:Q9S9T4]	1.05026	0.0054519
AT3G11840	E3 ubiquitin-protein ligase PUB24 [Source:UniProtKB/Swiss-Prot;Acc:Q9SF15]	1.04743	0.00365063
AT2G32030	Acyl-CoA N-acyltransferases (NAT) superfamily protein [Source:UniProtKB/TrEMBL;Acc:Q9SKZ6]	1.04681	0.00318872
AT3G26840	Acyltransferase-like protein At3g26840, chloroplastic [Source:UniProtKB/Swiss-Prot;Acc:Q9LW26]	1.04671	0.00468933
AT2G40000	Nematode resistance protein-like HSPRO2 [Source:UniProtKB/Swiss-Prot;Acc:O04203]	1.04625	0.00116729
AT1G63840	At1g63840/T12P18_14 [Source:UniProtKB/TrEMBL;Acc:Q9CAJ8]	1.0453	0.00516417
AT4G23190	Cysteine-rich receptor-like protein kinase 11 [Source:UniProtKB/Swiss-Prot;Acc:Q9ZP16]	1.0432	0.00571465
AT2G47800	ABC transporter C family member 4 [Source:UniProtKB/Swiss-Prot;Acc:Q7DM58]	1.04122	0.00534403
AT2G25090	Non-specific serine/threonine protein kinase [Source:UniProtKB/TrEMBL;Acc:A0A178W078]	1.03837	0.00342471
AT1G53100	At1g53100 [Source:UniProtKB/TrEMBL;Acc:Q6DBE8]	1.03732	0.00397936
AT5G61900	Protein BONZAI 1 [Source:UniProtKB/Swiss-Prot;Acc:Q941L3]	1.03687	0.00555721
AT1G04980	Protein disulfide-isomerase like 2-2 [Source:UniProtKB/Swiss-Prot;Acc:Q9MAU6]	1.03562	0.00733374
AT3G56710	SIB1 [Source:UniProtKB/TrEMBL;Acc:A0A178VMX5]	1.03527	0.000914955
AT5G25910	Receptor-like protein 52 [Source:UniProtKB/Swiss-Prot;Acc:Q7FZR1]	1.03447	0.00750861
AT4G37390	Auxin-responsive GH3 family protein [Source:TAIR;Acc:AT4G37390]	1.03409	0.00710129
AT1G24530	F21J9.19 [Source:UniProtKB/TrEMBL;Acc:Q9FYL1]	1.03387	0.00175085
AT1G18382	#N/A	1.03344	0.00413552
AT5G48380	Probably inactive leucine-rich repeat receptor-like protein kinase At5g48380 [Source:UniProtKB/Swiss-Prot;Acc:Q9ASS4]	1.03305	0.0033586
AT1G05570	Callose synthase 1 [Source:UniProtKB/Swiss-Prot;Acc:Q9AUE0]	1.02886	0.00250902
AT1G26410	Berberine bridge enzyme-like 6 [Source:UniProtKB/Swiss-Prot;Acc:Q9FZC7]	1.02869	0.0071608
AT1G16510	Auxin-responsive protein SAUR41 [Source:UniProtKB/Swiss-Prot;Acc:Q9SA49]	1.02763	0.0103709
AT3G13910	Protein of unknown function (DUF3511) [Source:TAIR;Acc:AT3G13910]	1.02617	0.00384247
AT2G37130	Peroxidase 21 [Source:UniProtKB/Swiss-Prot;Acc:Q42580]	1.02514	0.00992394
AT5G66053	unknown protein; LOCATED IN: mitochondrion; Has 30201 Blast hits to 17322 proteins in 780 species: Archae - 12; Bacteria - 1396; Metazoa - 17338; Fungi - 3422; Plants - 5037; Viruses - 0; Other Eukaryotes - 2996 (source: NCBI BLink). [Source:TAIR;Acc:AT5G66053]	1.02473	0.0157826
AT5G26340	STP13 [Source:UniProtKB/TrEMBL;Acc:A0A178UHA7]	1.02419	0.00390531
AT1G09932	Phosphoglycerate mutase family protein [Source:UniProtKB/TrEMBL;Acc:Q8GWG7]	1.02224	0.0115986
AT5G24210	Alpha/beta-Hydrolases superfamily protein [Source:UniProtKB/TrEMBL;Acc:Q9FNG1]	1.02215	0.00507576
AT1G76040	calcium-dependent protein kinase 29 [Source:TAIR;Acc:AT1G76040]	1.02058	0.00563552
AT4G25380	Zinc finger A20 and AN1 domain-containing stress-associated protein 10 [Source:UniProtKB/Swiss-Prot;Acc:Q9STJ9]	1.02052	0.00161711
AT3G46690	Glycosyltransferase (Fragment) [Source:UniProtKB/TrEMBL;Acc:W8Q337]	1.02013	0.00384044
AT2G45510	At2g45510 [Source:UniProtKB/TrEMBL;Acc:O64631]	1.0199	0.00457977
AT5G61490	Transmembrane protein [Source:UniProtKB/TrEMBL;Acc:Q9FKH0]	1.01729	0.0029685
AT3G50930	Protein HYPER-SENSITIVITY-RELATED 4 [Source:UniProtKB/Swiss-Prot;Acc:Q8VZG2]	1.01689	0.00363357
AT1G02440	ADP-ribosylation factor D1A [Source:UniProtKB/TrEMBL;Acc:F4HXI5]	1.01264	0.00392815
AT2G31880	Leucine-rich repeat receptor-like serine/threonine/tyrosine-protein kinase SOBIR1 [Source:UniProtKB/Swiss-Prot;Acc:Q9SKB2]	1.0117	0.00408298
AT5G25930	Kinase family with leucine-rich repeat domain-containing protein [Source:UniProtKB/TrEMBL;Acc:Q9XGZ2]	1.01156	0.00218543
AT5G40760	G6PD6 [Source:UniProtKB/TrEMBL;Acc:A0A384LPG4]	1.01125	0.00535675
AT5G23850	At5g23850 [Source:UniProtKB/TrEMBL;Acc:Q9FF95]	1.01044	0.00216043
AT4G02390	Poly [ADP-ribose] polymerase 2 [Source:UniProtKB/Swiss-Prot;Acc:Q11207]	1.00923	0.00119338
AT1G01340	Probable cyclic nucleotide-gated ion channel 10 [Source:UniProtKB/Swiss-Prot;Acc:Q9LNJ0]	1.00822	0.00628141
AT5G49680	Protein KINKY POLLEN [Source:UniProtKB/Swiss-Prot;Acc:Q6IMT0]	1.00816	0.00257957
AT5G65600	L-type lectin-domain containing receptor kinase IX.2 [Source:UniProtKB/Swiss-Prot;Acc:Q9LSL5]	1.00798	0.00343127
AT5G26700	Probable germin-like protein subfamily 2 member 5 [Source:UniProtKB/Swiss-Prot;Acc:O65252]	1.00642	0.00804432
AT5G42050	DCD (Development and Cell Death) domain protein [Source:UniProtKB/TrEMBL;Acc:Q8RXN8]	1.00631	0.00478499
AT2G33580	Protein LYK5 [Source:UniProtKB/Swiss-Prot;Acc:O22808]	1.00312	0.00251298
AT5G06750	Probable protein phosphatase 2C 68 [Source:UniProtKB/Swiss-Prot;Acc:Q84JD5]	1.00223	0.00253765
AT3G54640		1.00126	0.0101664
AT2G26390	Serpin-Z3 [Source:UniProtKB/Swiss-Prot;Acc:O48706]	1.00081	0.0023997
AT4G37900	Glycine-rich domain-containing protein 2 [Source:UniProtKB/Swiss-Prot;Acc:Q9SZJ2]	1.00003	0.00420662
AT1G14700		-1.00161	0.00607466
AT5G54145	At5g54141/$At5g54141 [Source:UniProtKB/TrEMBL;Acc:Q94BV1]	-1.00164	0.00897116
AT3G26450	Major latex protein, putative [Source:UniProtKB/TrEMBL;Acc:Q9LIN0]	-1.00362	0.00889777
AT1G30690	Patellin-4 [Source:UniProtKB/Swiss-Prot;Acc:Q94C59]	-1.00543	0.0165901
AT5G44130	Fasciclin-like arabinogalactan protein 13 [Source:UniProtKB/Swiss-Prot;Acc:Q9FFH6]	-1.00797	0.0459224
AT3G23550	Protein DETOXIFICATION 18 [Source:UniProtKB/Swiss-Prot;Acc:Q9LUH3]	-1.00902	0.00672305
AT2G34925	CLAVATA3/ESR (CLE)-related protein 42 [Source:UniProtKB/Swiss-Prot;Acc:Q6IWB2]	-1.01022	0.00277172
AT2G27130	Xylogen-like protein 11 [Source:UniProtKB/Swiss-Prot;Acc:Q9ZVC7]	-1.01283	0.00224503
AT4G36360	Beta-galactosidase 3 [Source:UniProtKB/Swiss-Prot;Acc:Q9SCV9]	-1.01295	0.00432316
AT3G05730	Defensin-like protein 205 [Source:UniProtKB/Swiss-Prot;Acc:Q9M9M3]	-1.01598	0.00741363
AT4G14440	Enoyl-CoA delta isomerase 3 [Source:UniProtKB/Swiss-Prot;Acc:O23300]	-1.01656	0.00549549
AT4G12420	Monocopper oxidase-like protein SKU5 [Source:UniProtKB/Swiss-Prot;Acc:Q9SU40]	-1.01802	0.0146218
AT5G35510	unknown protein; Has 1807 Blast hits to 1807 proteins in 277 species: Archae - 0; Bacteria - 0; Metazoa - 736; Fungi - 347; Plants - 385; Viruses - 0; Other Eukaryotes - 339 (source: NCBI BLink). [Source:TAIR;Acc:AT5G35510]	-1.01845	0.00465659
AT1G69523	At1g69520/F10D13_17 [Source:UniProtKB/TrEMBL;Acc:Q941B1]	-1.01986	0.00156682
AT4G36240	GATA transcription factor 7 [Source:UniProtKB/Swiss-Prot;Acc:O65515]	-1.02148	0.00556809
AT5G50950	AT5G50950 protein [Source:UniProtKB/TrEMBL;Acc:B9DFR5]	-1.02337	0.00734834
AT1G29500	Auxin-responsive protein SAUR66 [Source:UniProtKB/Swiss-Prot;Acc:Q9C7Q1]	-1.02395	0.0171018
AT5G44020	HAD superfamily, subfamily IIIB acid phosphatase [Source:UniProtKB/TrEMBL;Acc:Q9FNC4]	-1.024	0.015697
AT2G34490	Cytochrome P450 710A2 [Source:UniProtKB/Swiss-Prot;Acc:O64698]	-1.02423	0.0018539
AT5G65925	At5g65925 [Source:UniProtKB/TrEMBL;Acc:Q6NLB7]	-1.02551	0.00649835
AT5G12050	Protein BIG GRAIN 1-like D [Source:UniProtKB/Swiss-Prot;Acc:Q9LYH0]	-1.03276	0.00682914
AT4G32280	Auxin-responsive protein [Source:UniProtKB/TrEMBL;Acc:Q2VWA0]	-1.03334	0.00669337
AT4G15430	CSC1-like protein At4g15430 [Source:UniProtKB/Swiss-Prot;Acc:Q8VZM5]	-1.0343	0.00902862
AT2G02020	Protein NRT1/ PTR FAMILY 8.4 [Source:UniProtKB/Swiss-Prot;Acc:Q84WG0]	-1.03502	0.00437608
AT1G75680	Endoglucanase 10 [Source:UniProtKB/Swiss-Prot;Acc:Q8LCP6]	-1.04277	0.0077402
AT5G62920	Response regulator 6 [Source:UniProtKB/TrEMBL;Acc:Q0WSS6]	-1.04406	0.0102163
AT5G43870	At5g43870 [Source:UniProtKB/TrEMBL;Acc:Q9LKC2]	-1.04448	0.00996399
AT4G01410	At4g01410 [Source:UniProtKB/TrEMBL;Acc:Q9M132]	-1.0479	0.00627132
AT5G44680	DNA glycosylase superfamily protein [Source:UniProtKB/TrEMBL;Acc:Q9FIZ5]	-1.0482	0.0146572
AT4G02630	Protein kinase superfamily protein [Source:UniProtKB/TrEMBL;Acc:O22764]	-1.05552	0.0112677
AT1G13650	At1g13650 [Source:UniProtKB/TrEMBL;Acc:A2RVL9]	-1.0556	0.00373985
AT5G62430	Cyclic dof factor 1 [Source:UniProtKB/Swiss-Prot;Acc:Q8W1E3]	-1.05653	0.0141636
AT5G36790		-1.06107	0.00612003
AT3G25717	DVL6 [Source:UniProtKB/TrEMBL;Acc:Q6IM95]	-1.06195	0.00188495
AT5G54585	Uncharacterized protein At5g54585 [Source:UniProtKB/TrEMBL;Acc:Q8VZU6]	-1.06249	0.00468961
AT3G61750	Cytochrome b561 and DOMON domain-containing protein At3g61750 [Source:UniProtKB/Swiss-Prot;Acc:Q9M363]	-1.06344	0.0116297
AT1G78170	E3 ubiquitin-protein ligase [Source:UniProtKB/TrEMBL;Acc:Q84JP5]	-1.06475	0.00377993
AT2G04780	Fasciclin-like arabinogalactan protein 7 [Source:UniProtKB/Swiss-Prot;Acc:Q9SJ81]	-1.06843	0.00626762
AT1G26210	At1g26210 [Source:UniProtKB/TrEMBL;Acc:Q67YG7]	-1.07279	0.00870143
AT2G30010	TRICHOME BIREFRINGENCE-LIKE 45 [Source:TAIR;Acc:AT2G30010]	-1.07372	0.00488784
AT5G21100	Ascorbate oxidase-like protein [Source:UniProtKB/TrEMBL;Acc:Q8LPL3]	-1.07518	0.00819318
AT2G32640	Lycopene beta/epsilon cyclase protein [Source:UniProtKB/TrEMBL;Acc:Q0WVA1]	-1.07669	0.00155913
AT5G09670	At5g09670 [Source:UniProtKB/TrEMBL;Acc:Q9LXD0]	-1.07735	0.0160703
AT4G39510	CYP96A12 [Source:UniProtKB/TrEMBL;Acc:A0A178V036]	-1.07739	0.00182044
AT1G56720	At1g56720 [Source:UniProtKB/TrEMBL;Acc:Q7Y229]	-1.0794	0.00654973
AT5G24105	Arabinogalactan protein 41 [Source:UniProtKB/Swiss-Prot;Acc:Q8L9T8]	-1.08289	0.00191433
AT1G33170	Probable methyltransferase PMT18 [Source:UniProtKB/Swiss-Prot;Acc:Q9C884]	-1.0831	0.00426222
AT4G18670	Leucine-rich repeat extensin-like protein 5 [Source:UniProtKB/Swiss-Prot;Acc:Q9SN46]	-1.08378	0.0077775
AT5G62100	BCL-2-associated athanogene 2 [Source:TAIR;Acc:AT5G62100]	-1.0845	0.0116186
AT4G12980	Cytochrome b561 and DOMON domain-containing protein At4g12980 [Source:UniProtKB/Swiss-Prot;Acc:Q9SV71]	-1.08908	0.00850049
AT2G18890	At2g18890 [Source:UniProtKB/TrEMBL;Acc:O64619]	-1.09403	0.00166208
AT3G43720	Non-specific lipid transfer protein GPI-anchored 2 [Source:UniProtKB/Swiss-Prot;Acc:Q9LZH5]	-1.09428	0.00879226
AT5G05580	Temperature-sensitive sn-2 acyl-lipid omega-3 desaturase (ferredoxin), chloroplastic [Source:UniProtKB/Swiss-Prot;Acc:P48622]	-1.10217	0.00575998
AT2G22240	Inositol-3-phosphate synthase isozyme 2 [Source:UniProtKB/Swiss-Prot;Acc:Q38862]	-1.10324	0.00586576
AT5G10570	Transcription factor bHLH61 [Source:UniProtKB/Swiss-Prot;Acc:Q9LXA9]	-1.11227	0.00131152
AT1G14280	Protein PHYTOCHROME KINASE SUBSTRATE 2 [Source:UniProtKB/Swiss-Prot;Acc:Q9M9T4]	-1.11374	0.0167333
AT3G25670	Leucine-rich repeat (LRR) family protein [Source:UniProtKB/TrEMBL;Acc:F4JA38]	-1.11594	0.00793979
AT5G18060	SAUR23 [Source:UniProtKB/TrEMBL;Acc:A0A178UM65]	-1.1164	0.00411547
AT4G00950	Uncharacterized protein At4g00950 [Source:UniProtKB/Swiss-Prot;Acc:Q9M160]	-1.11651	0.00796307
AT5G40380	Cysteine-rich receptor-like protein kinase 42 [Source:UniProtKB/Swiss-Prot;Acc:Q9FNE1]	-1.11918	0.0294784
AT2G38480	CASP-like protein 4B1 [Source:UniProtKB/Swiss-Prot;Acc:Q8LE26]	-1.11957	0.00618831
AT1G27120	Hydroxyproline O-galactosyltransferase GALT4 [Source:UniProtKB/Swiss-Prot;Acc:Q8GXG6]	-1.11988	0.00309292
AT4G33220	Probable pectinesterase/pectinesterase inhibitor 44 [Source:UniProtKB/Swiss-Prot;Acc:Q9SMY7]	-1.12002	0.00503986
AT2G28150	UPSTREAM OF FLC protein (DUF966) [Source:UniProtKB/TrEMBL;Acc:Q8GYT8]	-1.12084	0.00640507
AT2G26250	3-ketoacyl-CoA synthase [Source:UniProtKB/TrEMBL;Acc:A0A178VYA3]	-1.1236	0.00798734
AT1G65295	Ubiquitin carboxyl-terminal hydrolase [Source:UniProtKB/TrEMBL;Acc:Q8H130]	-1.12697	0.00343853
AT1G01250	Ethylene-responsive transcription factor ERF023 [Source:UniProtKB/Swiss-Prot;Acc:Q1ECI2]	-1.12927	0.00656599
AT2G15020	At2g15020 [Source:UniProtKB/TrEMBL;Acc:Q9ZUK9]	-1.13215	0.00219807
AT5G45280	Pectin acetylesterase 11 [Source:UniProtKB/Swiss-Prot;Acc:Q9FH82]	-1.13271	0.00760445
AT5G05250	AT5g05250/K18I23_5 [Source:UniProtKB/TrEMBL;Acc:Q9FLC9]	-1.13354	0.00106628
AT1G22590	AGAMOUS-like 87 [Source:UniProtKB/TrEMBL;Acc:Q7X9H1]	-1.13417	0.000633063
AT5G25610	BURP domain protein RD22 [Source:UniProtKB/Swiss-Prot;Acc:Q08298]	-1.13483	0.00748331
AT1G64670	alpha/beta-Hydrolases superfamily protein [Source:TAIR;Acc:AT1G64670]	-1.13535	0.00256267
AT4G17460	Homeobox-leucine zipper protein HAT1 [Source:UniProtKB/Swiss-Prot;Acc:P46600]	-1.13882	0.0221402
AT4G25960	ABC transporter B family member 2 [Source:UniProtKB/Swiss-Prot;Acc:Q8LPK2]	-1.13888	0.00550914
AT3G16240	Aquaporin TIP2-1 [Source:UniProtKB/Swiss-Prot;Acc:Q41951]	-1.13939	0.0100109
AT5G45940	Nudix hydrolase 11 [Source:UniProtKB/Swiss-Prot;Acc:Q8LET2]	-1.14197	0.00358955
AT4G26290	At4g26290 [Source:UniProtKB/TrEMBL;Acc:Q9STQ5]	-1.14251	0.021225
AT5G48900	Probable pectate lyase 20 [Source:UniProtKB/Swiss-Prot;Acc:Q93WF1]	-1.14369	0.00508128
AT3G23805	Protein RALF-like 24 [Source:UniProtKB/Swiss-Prot;Acc:Q9LK37]	-1.14422	0.00744594
AT4G25780	CAP (Cysteine-rich secretory proteins, Antigen 5, and Pathogenesis-related 1 protein) superfamily protein [Source:UniProtKB/TrEMBL;Acc:Q9SW05]	-1.14917	0.00833874
AT5G52280	At5g52280 [Source:UniProtKB/TrEMBL;Acc:Q9FHD1]	-1.15091	0.00250481
AT1G74890	Two-component response regulator ARR15 [Source:UniProtKB/Swiss-Prot;Acc:Q7G8V2]	-1.15313	0.00492911
AT5G10250	Phototropic-responsive NPH3 family protein [Source:TAIR;Acc:AT5G10250]	-1.15668	0.00449705
AT2G01422	#N/A	-1.1615	0.00693808
AT5G14410	unknown protein; Has 23 Blast hits to 23 proteins in 9 species: Archae - 0; Bacteria - 0; Metazoa - 0; Fungi - 0; Plants - 23; Viruses - 0; Other Eukaryotes - 0 (source: NCBI BLink). [Source:TAIR;Acc:AT5G14410]	-1.1621	0.00149908
AT4G03445	#N/A	-1.16537	0.00242729
AT1G77580	Filament-like plant protein 1 [Source:UniProtKB/Swiss-Prot;Acc:Q9CAP9]	-1.16668	0.00332992
AT1G29660	GDSL esterase/lipase At1g29660 [Source:UniProtKB/Swiss-Prot;Acc:Q9C7N5]	-1.16852	0.00976388
AT2G34620	Mitochondrial transcription termination factor family protein [Source:UniProtKB/TrEMBL;Acc:O64685]	-1.17229	0.00262039
AT5G62140	ATP-dependent Clp protease ATP-binding subunit [Source:UniProtKB/TrEMBL;Acc:Q9FIS4]	-1.17569	0.00598179
AT4G04630	Putative uncharacterized protein [Source:UniProtKB/TrEMBL;Acc:Q8LFI5]	-1.17801	0.00426374
AT2G37640	Expansin [Source:UniProtKB/TrEMBL;Acc:A0A178VPK3]	-1.18214	0.0038938
AT2G10940	At2g10940/F15K19.1 [Source:UniProtKB/TrEMBL;Acc:Q9SKI0]	-1.18307	0.0107886
AT5G06790	At5g06790 [Source:UniProtKB/TrEMBL;Acc:Q9FG28]	-1.18328	0.00448981
AT4G12730	Fasciclin-like arabinogalactan protein 2 [Source:UniProtKB/Swiss-Prot;Acc:Q9SU13]	-1.18666	0.00906753
AT1G62510	Bifunctional inhibitor/lipid-transfer protein/seed storage 2S albumin superfamily protein [Source:UniProtKB/TrEMBL;Acc:Q9SXE6]	-1.18962	0.0106359
AT1G51500	WBC12 [Source:UniProtKB/TrEMBL;Acc:A0A178W3S0]	-1.1909	0.00327372
AT3G05900	Neurofilament protein-like protein [Source:UniProtKB/TrEMBL;Acc:F4J9K9]	-1.19131	0.00940382
AT5G55570	unknown protein; LOCATED IN: chloroplast; Has 35333 Blast hits to 34131 proteins in 2444 species: Archae - 798; Bacteria - 22429; Metazoa - 974; Fungi - 991; Plants - 531; Viruses - 0; Other Eukaryotes - 9610 (source: NCBI BLink). [Source:TAIR;Acc:AT5G55570]	-1.19203	0.00299394
AT4G24510	VC2 [Source:UniProtKB/TrEMBL;Acc:A0A178V1H6]	-1.19263	0.00776407
AT1G72130	Protein NRT1/ PTR FAMILY 5.11 [Source:UniProtKB/Swiss-Prot;Acc:Q8RX67]	-1.19787	0.00384003
AT4G35783	DVL17 [Source:UniProtKB/TrEMBL;Acc:Q6IM84]	-1.20246	0.00529897
AT1G20070	T20H2.15 protein [Source:UniProtKB/TrEMBL;Acc:Q9LNT3]	-1.20755	0.00129483
AT2G24540	F-box protein AFR [Source:UniProtKB/Swiss-Prot;Acc:Q8LAW2]	-1.20902	0.00252299
AT1G29460	SAUR-like auxin-responsive protein family [Source:TAIR;Acc:AT1G29460]	-1.21007	0.00256728
AT5G18660	Divinyl chlorophyllide a 8-vinyl-reductase, chloroplastic [Source:UniProtKB/Swiss-Prot;Acc:Q1H537]	-1.21356	0.00240345
AT2G47485	At2g47485 [Source:UniProtKB/TrEMBL;Acc:Q6DBG0]	-1.22019	0.0024697
AT3G48460	GDSL esterase/lipase At3g48460 [Source:UniProtKB/Swiss-Prot;Acc:Q9STM6]	-1.22398	0.00446789
AT3G16420		-1.22458	0.00694751
AT5G41900	Probable lysophospholipase BODYGUARD 2 [Source:UniProtKB/Swiss-Prot;Acc:Q9FJ24]	-1.22543	0.00524269
AT5G41590	Protein LURP-one-related 17 [Source:UniProtKB/Swiss-Prot;Acc:A0MFL4]	-1.22598	0.00335584
AT1G64390	Endoglucanase 6 [Source:UniProtKB/Swiss-Prot;Acc:Q42059]	-1.22938	0.00161658
AT1G63260	Tetraspanin-10 [Source:UniProtKB/Swiss-Prot;Acc:F4I214]	-1.23396	0.00601368
AT4G34770	SAUR-like auxin-responsive protein family [Source:UniProtKB/TrEMBL;Acc:Q9SW57]	-1.2348	0.00595782
AT5G02540	NAD(P)-binding Rossmann-fold superfamily protein [Source:UniProtKB/TrEMBL;Acc:F4KCF2]	-1.23874	0.00317404
AT4G12690	At4g12690 [Source:UniProtKB/TrEMBL;Acc:Q9SU17]	-1.24105	0.00694905
AT1G64780	Ammonium transporter 1 member 2 [Source:UniProtKB/Swiss-Prot;Acc:Q9ZPJ8]	-1.24204	0.00231852
AT2G29300	NAD(P)-binding Rossmann-fold superfamily protein [Source:UniProtKB/TrEMBL;Acc:F4IKL5]	-1.24342	0.00387079
AT1G57980	Probable purine permease 23 [Source:UniProtKB/Swiss-Prot;Acc:Q9C654]	-1.25085	0.00720504
AT3G52370	FASCICLIN-like arabinogalactan protein 15 [Source:UniProtKB/TrEMBL;Acc:A0A1I9LLN6]	-1.25705	0.00314437
AT5G46690	Transcription factor bHLH71 [Source:UniProtKB/Swiss-Prot;Acc:Q56XR0]	-1.25821	0.00224582
AT5G39860	Transcription factor PRE1 [Source:UniProtKB/Swiss-Prot;Acc:Q9FLE9]	-1.25822	0.00136732
AT5G06270	Gb [Source:UniProtKB/TrEMBL;Acc:Q9FNI1]	-1.25935	0.0070547
AT4G24780	Probable pectate lyase 18 [Source:UniProtKB/Swiss-Prot;Acc:Q9C5M8]	-1.26177	0.00237059
AT2G22170	PLAT domain-containing protein 2 [Source:UniProtKB/Swiss-Prot;Acc:Q9SIE7]	-1.26287	0.00122736
AT5G26230	Probable membrane-associated kinase regulator 1 [Source:UniProtKB/Swiss-Prot;Acc:Q3E936]	-1.26382	0.00142664
AT1G02205	Fatty acid hydroxylase superfamily [Source:TAIR;Acc:AT1G02205]	-1.26408	0.00874955
AT2G41312	#N/A	-1.26576	0.00414784
AT3G10940	Phosphoglucan phosphatase LSF2, chloroplastic [Source:UniProtKB/Swiss-Prot;Acc:Q9SRK5]	-1.26674	0.00340629
AT3G14770	Bidirectional sugar transporter SWEET [Source:UniProtKB/TrEMBL;Acc:A0A178VM79]	-1.26984	0.00242299
AT2G38540	Non-specific lipid-transfer protein [Source:UniProtKB/TrEMBL;Acc:A0A178VZQ3]	-1.27025	0.00503559
AT5G08210	#N/A	-1.27323	0.00622413
AT5G51460	Trehalose 6-phosphate phosphatase [Source:UniProtKB/TrEMBL;Acc:A0A178UCG0]	-1.28088	0.00882336
AT4G15630	CASP-like protein 1E1 [Source:UniProtKB/Swiss-Prot;Acc:Q8L8Z1]	-1.28134	0.00395971
AT1G27030	At1g27030/T7N9_9 [Source:UniProtKB/TrEMBL;Acc:Q9LFY3]	-1.28425	0.00105142
AT1G55330	ATAGP21 [Source:UniProtKB/TrEMBL;Acc:A0A178W6X6]	-1.28626	0.00842972
AT3G17640	Leucine-rich repeat (LRR) family protein [Source:UniProtKB/TrEMBL;Acc:Q9LUN3]	-1.28968	0.00342251
AT5G55620	At5g55620 [Source:UniProtKB/TrEMBL;Acc:Q8LC55]	-1.29357	0.00260014
AT5G23750	Remorin family protein [Source:TAIR;Acc:AT5G23750]	-1.29644	0.00509883
AT1G20190	Expansin-A11 [Source:UniProtKB/Swiss-Prot;Acc:Q9LNU3]	-1.29713	0.00170098
AT5G50740	Heavy metal transport/detoxification superfamily protein [Source:UniProtKB/TrEMBL;Acc:B3H4U8]	-1.30727	0.00332519
AT4G27360	Dynein light chain [Source:UniProtKB/TrEMBL;Acc:Q8VZW5]	-1.30788	0.00159684
AT2G36870	Probable xyloglucan endotransglucosylase/hydrolase protein 32 [Source:UniProtKB/Swiss-Prot;Acc:Q9SJL9]	-1.31039	0.00177064
AT3G44990	Xyloglucan endotransglucosylase/hydrolase protein 31 [Source:UniProtKB/Swiss-Prot;Acc:P93046]	-1.31313	0.00311855
AT1G04520	Cysteine-rich repeat secretory protein 3 [Source:UniProtKB/Swiss-Prot;Acc:Q6NM73]	-1.31383	0.00121813
AT3G16370		-1.31649	0.00465668
AT5G18020	Auxin-responsive protein SAUR20 [Source:UniProtKB/Swiss-Prot;Acc:Q9FJG0]	-1.32405	0.00225406
AT1G70830	MLP-like protein 28 [Source:UniProtKB/Swiss-Prot;Acc:Q9SSK9]	-1.32571	0.00338265
AT4G18440	Adenylosuccinate lyase [Source:UniProtKB/TrEMBL;Acc:Q8RY94]	-1.32833	0.00698404
AT2G37790	Aldo-keto reductase family 4 member C10 [Source:UniProtKB/Swiss-Prot;Acc:Q84TF0]	-1.32888	0.00376505
AT1G70985	Hydroxyproline-rich glycoprotein family protein [Source:UniProtKB/TrEMBL;Acc:Q8LGG2]	-1.32975	0.00132587
AT5G10150	Protein UPSTREAM OF FLC [Source:UniProtKB/Swiss-Prot;Acc:Q9LX14]	-1.3307	0.00404067
AT1G68530	3-ketoacyl-CoA synthase [Source:UniProtKB/TrEMBL;Acc:A0A178WCX7]	-1.33507	0.00291281
AT2G41290	Protein STRICTOSIDINE SYNTHASE-LIKE 2 [Source:UniProtKB/Swiss-Prot;Acc:Q9SLG8]	-1.33746	0.00255018
AT4G38770	Proline-rich protein 4 [Source:UniProtKB/Swiss-Prot;Acc:Q9T0I5]	-1.34578	0.00346208
AT2G06850	Xyloglucan endotransglucosylase/hydrolase protein 4 [Source:UniProtKB/Swiss-Prot;Acc:Q39099]	-1.35896	0.0082872
AT5G61160	Agmatine coumaroyltransferase [Source:UniProtKB/Swiss-Prot;Acc:Q9FNP9]	-1.35996	0.00201487
AT4G23670	AT4G23670 protein [Source:UniProtKB/TrEMBL;Acc:Q9SUR0]	-1.3628	0.00660274
AT1G04250	Auxin-responsive protein IAA17 [Source:UniProtKB/Swiss-Prot;Acc:P93830]	-1.36942	0.00332031
AT1G06980	6,7-dimethyl-8-ribityllumazine synthase [Source:UniProtKB/TrEMBL;Acc:Q9LMJ2]	-1.37387	0.0037415
AT3G55890	Protein yippee-like [Source:UniProtKB/TrEMBL;Acc:Q0WPD7]	-1.37681	0.00213273
AT5G66580	Uncharacterized protein At5g66580 [Source:UniProtKB/TrEMBL;Acc:Q9FJY2]	-1.37728	0.00423392
AT1G09310	T31J12.3 protein [Source:UniProtKB/TrEMBL;Acc:Q9ZPZ4]	-1.38466	0.00298254
AT2G35860	FLA16 [Source:UniProtKB/TrEMBL;Acc:A0A178VR39]	-1.38504	0.00258968
AT3G23450	Transmembrane protein [Source:UniProtKB/TrEMBL;Acc:Q9LW52]	-1.39181	0.00376739
AT2G43920	HOL2 [Source:UniProtKB/TrEMBL;Acc:A0A178VP97]	-1.395	0.000923923
AT3G15356	Lectin-like protein LEC [Source:UniProtKB/Swiss-Prot;Acc:Q9LJR2]	-1.39528	0.00177802
AT3G52720		-1.40836	0.00480313
AT5G13400	Protein NRT1/ PTR FAMILY 6.1 [Source:UniProtKB/Swiss-Prot;Acc:Q9LYR6]	-1.41459	0.00682031
AT4G00400	Probable glycerol-3-phosphate acyltransferase 8 [Source:UniProtKB/Swiss-Prot;Acc:Q5XF03]	-1.41733	0.00283657
AT1G04220	3-ketoacyl-CoA synthase 2 [Source:UniProtKB/Swiss-Prot;Acc:Q5XEP9]	-1.42838	0.00129073
AT2G39330	jacalin-related lectin 23 [Source:TAIR;Acc:AT2G39330]	-1.42996	0.00572774
AT1G45010	TRAM, LAG1 and CLN8 (TLC) lipid-sensing domain containing protein [Source:UniProtKB/TrEMBL;Acc:Q8VZR3]	-1.43259	0.00149746
AT1G49430	Long chain acyl-CoA synthetase 2 [Source:UniProtKB/Swiss-Prot;Acc:Q9XIA9]	-1.43778	0.00239937
AT4G12970	EPIDERMAL PATTERNING FACTOR-like protein 9 [Source:UniProtKB/Swiss-Prot;Acc:Q9SV72]	-1.44369	0.00161484
AT2G43018	#N/A	-1.45836	0.00752328
AT5G03760	Glucomannan 4-beta-mannosyltransferase 9 [Source:UniProtKB/Swiss-Prot;Acc:Q9LZR3]	-1.46483	0.00162009
AT3G49340	Cysteine protease-like protein [Source:UniProtKB/TrEMBL;Acc:Q9SG15]	-1.48039	0.000606759
AT3G52360	Transmembrane protein [Source:UniProtKB/TrEMBL;Acc:Q9FT46]	-1.48431	0.00109524
AT2G27402	At2g27402 [Source:UniProtKB/TrEMBL;Acc:Q8GX30]	-1.48591	0.000643832
AT3G27690	Chlorophyll a-b binding protein, chloroplastic [Source:UniProtKB/TrEMBL;Acc:A0A1I9LMB4]	-1.48609	0.00209933
AT1G69160	Protein BIG GRAIN 1-like E [Source:UniProtKB/Swiss-Prot;Acc:Q93Z37]	-1.48702	0.00236769
AT4G25830	CASP-like protein [Source:UniProtKB/TrEMBL;Acc:A0A178UTE2]	-1.48794	0.00284489
AT1G02340	Transcription factor HFR1 [Source:UniProtKB/Swiss-Prot;Acc:Q9FE22]	-1.50515	0.00263558
AT4G34530	CIB1 [Source:UniProtKB/TrEMBL;Acc:A0A178V495]	-1.51828	0.000966078
AT4G30400	RING-H2 finger protein ATL13 [Source:UniProtKB/Swiss-Prot;Acc:Q940Q4]	-1.52542	0.00215754
AT2G17300	At2g17300 [Source:UniProtKB/TrEMBL;Acc:Q6NLF1]	-1.55331	0.0016933
AT1G29510	Auxin-responsive protein SAUR67 [Source:UniProtKB/Swiss-Prot;Acc:F4I1I4]	-1.56482	0.000887779
AT3G60290	2-oxoglutarate (2OG) and Fe(II)-dependent oxygenase superfamily protein [Source:UniProtKB/TrEMBL;Acc:F4JAP7]	-1.59521	0.00112407
AT5G20270	Heptahelical transmembrane protein 1 [Source:UniProtKB/Swiss-Prot;Acc:Q93ZH9]	-1.63624	0.00451887
AT1G27950	Non-specific lipid transfer protein GPI-anchored 1 [Source:UniProtKB/Swiss-Prot;Acc:Q9C7F7]	-1.64166	0.00219339
AT3G02380	Zinc finger protein CONSTANS-LIKE 2 [Source:UniProtKB/Swiss-Prot;Acc:Q96502]	-1.66667	0.000859182
AT1G32900	Granule-bound starch synthase 1, chloroplastic/amyloplastic [Source:UniProtKB/Swiss-Prot;Acc:Q9MAQ0]	-1.67257	0.000754753
AT1G75900		-1.68289	0.00166358
AT5G45950	GDSL esterase/lipase At5g45950 [Source:UniProtKB/Swiss-Prot;Acc:Q9FJ41]	-1.68786	0.00402208
AT5G05890	Glycosyltransferase (Fragment) [Source:UniProtKB/TrEMBL;Acc:W8PV16]	-1.72464	0.000491136
AT2G23000	Scpl10 [Source:UniProtKB/TrEMBL;Acc:A0A178VYK6]	-1.77014	0.00204832
AT3G48720	HXXXD-type acyl-transferase family protein [Source:UniProtKB/TrEMBL;Acc:Q9SMM7]	-1.83057	0.00110797
AT1G10370	Glutathione S-transferase U17 [Source:UniProtKB/Swiss-Prot;Acc:Q9FUS8]	-1.83165	0.000789841
AT1G53490	E3 ubiquitin-protein ligase CCNB1IP1 homolog [Source:UniProtKB/Swiss-Prot;Acc:F4HRI2]	-1.84512	0.000361336
AT4G37800	Probable xyloglucan endotransglucosylase/hydrolase protein 7 [Source:UniProtKB/Swiss-Prot;Acc:Q8LER3]	-1.87437	0.000402233
AT5G36910	At5g36910 [Source:UniProtKB/TrEMBL;Acc:A6QRC1]	-1.87514	0.00104817
AT5G57760	At5g57760 [Source:UniProtKB/TrEMBL;Acc:Q9FHG7]	-1.87569	0.000498209
AT1G66100	Probable thionin-2.4 [Source:UniProtKB/Swiss-Prot;Acc:Q9C8D6]	-1.89157	0.000946999
AT1G55260	Bifunctional inhibitor/lipid-transfer protein/seed storage 2S albumin superfamily protein [Source:UniProtKB/TrEMBL;Acc:F4I082]	-1.91121	0.000671947
AT2G40475	Expressed protein [Source:UniProtKB/TrEMBL;Acc:Q8RYE6]	-1.92954	0.000382207
AT1G01120	3-ketoacyl-CoA synthase [Source:UniProtKB/TrEMBL;Acc:A0A178W124]	-1.94392	0.00451906
AT5G44430	PDF1.2c [Source:UniProtKB/TrEMBL;Acc:A0A178UR42]	-1.99784	0.000525296
AT3G02470	S-adenosylmethionine decarboxylase proenzyme 1 [Source:UniProtKB/Swiss-Prot;Acc:Q96286]	-2.1137	0.000262396
AT5G23820	MD-2-related lipid-recognition protein 3 [Source:UniProtKB/Swiss-Prot;Acc:Q9FF98]	-2.12094	0.000747564
AT3G28270	UPF0496 protein At3g28270 [Source:UniProtKB/Swiss-Prot;Acc:Q9LHD9]	-2.18179	0.00318597
AT4G39330	Probable cinnamyl alcohol dehydrogenase 9 [Source:UniProtKB/Swiss-Prot;Acc:P42734]	-2.21104	0.000462014
AT5G24770	Vegetative storage protein 2 [Source:UniProtKB/Swiss-Prot;Acc:O82122]	-2.23224	0.00127919
AT2G26010	PDF1.3 [Source:UniProtKB/TrEMBL;Acc:A0A178VSS6]	-2.27143	0.000170622
AT1G05065	CLAVATA3/ESR (CLE)-related protein 20 [Source:UniProtKB/Swiss-Prot;Acc:Q3EDI6]	-2.27268	0.000427188
AT5G65730	Xyloglucan endotransglucosylase/hydrolase [Source:UniProtKB/TrEMBL;Acc:Q0WUU2]	-2.53722	0.000863075
AT5G44420	Defensin-like protein 16 [Source:UniProtKB/Swiss-Prot;Acc:Q9FI23]	-2.60774	0.00019365
AT3G42658	#N/A	-2.62744	4.90309e-06

## Sheet: Table S6
SI Appendix Table S6 Overlapped differentially expressed genes in both nac90-1 and nac90-2 mutants.
ID	Feature ID	Annotation	nac90-2/WT log2 (FC)	nac90-1/WT Log2 (FC)
AT4G18430	RABA1E	Ras-related protein RABA1e [Source:UniProtKB/Swiss-Prot;Acc:O49513]	13.119	1.75311
AT2G02930	GSTF3	Glutathione S-transferase F3 [Source:UniProtKB/Swiss-Prot;Acc:Q9SLM6]	12.8396	1.30062
AT5G49680	KIP	Protein KINKY POLLEN [Source:UniProtKB/Swiss-Prot;Acc:Q6IMT0]	12.6454	1.00816
AT5G53110	gene:AT5G53110	RING/U-box superfamily protein [Source:UniProtKB/TrEMBL;Acc:F4KJ04]	12.4426	1.6757
AT4G30640	FBL19	Putative F-box/LRR-repeat protein 19 [Source:UniProtKB/Swiss-Prot;Acc:Q9M096]	12.3544	1.20554
AT1G65484	gene:AT1G65484	unknown protein; FUNCTIONS IN: molecular_function unknown; INVOLVED IN: biological_process unknown; LOCATED IN: endomembrane system; Has 30201 Blast hits to 17322 proteins in 780 species: Archae - 12; Bacteria - 1396; Metazoa - 17338; Fungi - 3422; /.../ - 5037; Viruses - 0; Other Eukaryotes - 2996 (source: NCBI BLink). [Source:TAIR;Acc:AT1G65484]	6.4054	1.64109
AT1G51860	gene:AT1G51860	Probable LRR receptor-like serine/threonine-protein kinase At1g51860 [Source:UniProtKB/Swiss-Prot;Acc:C0LGG4]	5.5146	2.03277
AT2G14620	XTH10	Probable xyloglucan endotransglucosylase/hydrolase protein 10 [Source:UniProtKB/Swiss-Prot;Acc:Q9ZVK1]	5.4002	1.10662
AT1G26380	FOX1	Berberine bridge enzyme-like 3 [Source:UniProtKB/Swiss-Prot;Acc:Q9FZC4]	5.2826	1.70324
AT3G44350	NAC61	NAC domain containing protein 61 [Source:UniProtKB/TrEMBL;Acc:B3H506]	5.2641	1.70599
AT3G53650	gene:AT3G53650	Histone H2B.8 [Source:UniProtKB/Swiss-Prot;Acc:Q9LFF6]	5.2603	1.05583
AT1G26420	FOX5	Berberine bridge enzyme-like 7 [Source:UniProtKB/Swiss-Prot;Acc:Q9FZC8]	5.205	1.83754
AT1G44130	gene:AT1G44130	Eukaryotic aspartyl protease family protein [Source:UniProtKB/TrEMBL;Acc:Q9C6Y5]	5.2004	1.25638
AT1G67980	CCOAMT	Putative caffeoyl-CoA O-methyltransferase At1g67980 [Source:UniProtKB/Swiss-Prot;Acc:Q9C9W3]	5.0343	2.10262
AT1G65510	gene:AT1G65510	unknown protein; FUNCTIONS IN: molecular_function unknown; INVOLVED IN: N-terminal protein myristoylation; LOCATED IN: endomembrane system; EXPRESSED IN: 9 plant structures; EXPRESSED DURING: LP.06 six leaves visible, LP.04 four leaves visible, 4 an /.../, petal differentiation and expansion stage, LP.08 eight leaves visible; BEST Arabidopsis thaliana protein match is: unknown protein (TAIR:AT1G6…	5.0145	1.98702
AT5G40230	gene:AT5G40230	WAT1-related protein At5g40230 [Source:UniProtKB/Swiss-Prot;Acc:F4KHA8]	4.8606	1.1362
AT3G24900	AtRLP39	Receptor like protein 39 [Source:UniProtKB/TrEMBL;Acc:A0A1I9LR86]	4.848	1.23438
AT2G13810	ALD1	EDTS5 [Source:UniProtKB/TrEMBL;Acc:A0A178VQ02]	4.6716	1.96335
AT3G21520	DMP1	Protein DMP1 [Source:UniProtKB/Swiss-Prot;Acc:Q9LVF4]	4.6439	1.44784
AT4G23310	CRK23	Putative cysteine-rich receptor-like protein kinase 23 [Source:UniProtKB/Swiss-Prot;Acc:O65482]	4.6037	1.49507
AT1G73260	KTI1	Kunitz trypsin inhibitor 1 [Source:UniProtKB/Swiss-Prot;Acc:Q8RXD5]	4.5679	1.11396
AT2G43000	JUB1	Transcription factor JUNGBRUNNEN 1 [Source:UniProtKB/Swiss-Prot;Acc:Q9SK55]	4.4725	1.85923
AT5G09290	SAL4	3'(2'),5'-bisphosphate nucleotidase-like protein [Source:UniProtKB/TrEMBL;Acc:Q0WTK9]	4.4661	2.45066
AT4G39670	gene:AT4G39670	ACD11 homolog protein [Source:UniProtKB/Swiss-Prot;Acc:Q8L7U7]	4.3779	1.12547
AT1G34180	anac016	NAC domain containing protein 16 [Source:TAIR;Acc:AT1G34180]	4.3643	1.73776
AT2G44240	gene:AT2G44240	At2g44240/F4I1.5 [Source:UniProtKB/TrEMBL;Acc:O64859]	4.3447	3.25339
AT3G46090	ZAT7	ZAT7 [Source:UniProtKB/TrEMBL;Acc:A0A178VI57]	4.284	2.60519
AT3G15518	gene:AT3G15518	Putative uncharacterized protein [Source:UniProtKB/TrEMBL;Acc:Q8GYA5]	4.2819	1.76443
AT2G29110	ATGLR2.8	Glutamate receptor [Source:UniProtKB/TrEMBL;Acc:A0A178VW76]	4.2417	1.46596
AT5G38250	LRK10L-2.3	LEAF RUST 10 DISEASE-RESISTANCE LOCUS RECEPTOR-LIKE PROTEIN KINASE-like 2.3 [Source:UniProtKB/Swiss-Prot;Acc:F4KA51]	4.1794	1.78961
AT1G26200	gene:AT1G26200	TRAM, LAG1 and CLN8 (TLC) lipid-sensing domain containing protein [Source:TAIR;Acc:AT1G26200]	4.1604	1.44143
AT2G32140	gene:AT2G32140	Transmembrane receptor [Source:UniProtKB/TrEMBL;Acc:F4ISS7]	4.0882	1.38305
AT2G34940	VSR5	VSR5 [Source:UniProtKB/TrEMBL;Acc:A0A384KPH5]	4.0231	1.24807
AT3G54150	gene:AT3G54150	Embryonic abundant protein-like [Source:UniProtKB/TrEMBL;Acc:Q9M389]	4.0142	1.41382
AT5G22520	gene:AT5G22520	At5g22520 [Source:UniProtKB/TrEMBL;Acc:Q9FK87]	3.991	1.26353
AT2G46150	gene:AT2G46150	Late embryogenesis abundant (LEA) hydroxyproline-rich glycoprotein family [Source:UniProtKB/TrEMBL;Acc:O82354]	3.9725	1.43761
AT4G17500	ERF1A	Ethylene-responsive transcription factor 1A [Source:UniProtKB/Swiss-Prot;Acc:O80337]	3.8811	1.64025
AT1G02470	gene:AT1G02470	Polyketide cyclase/dehydrase and lipid transport superfamily protein [Source:UniProtKB/TrEMBL;Acc:F4HXI8]	3.8595	1.34807
AT1G24530	gene:AT1G24530	F21J9.19 [Source:UniProtKB/TrEMBL;Acc:Q9FYL1]	3.848	1.03387
AT1G01680	PUB54	U-box domain-containing protein 54 [Source:UniProtKB/Swiss-Prot;Acc:Q9LQ92]	3.8467	1.22528
AT1G67000	LRK10L-2.8	LEAF RUST 10 DISEASE-RESISTANCE LOCUS RECEPTOR-LIKE PROTEIN KINASE-like 2.8 [Source:UniProtKB/Swiss-Prot;Acc:Q3ECH2]	3.819	1.16332
AT1G32350	AOX3	AOX1D [Source:UniProtKB/TrEMBL;Acc:A0A384LFI3]	3.7574	1.14504
AT1G64670	BDG1	alpha/beta-Hydrolases superfamily protein [Source:TAIR;Acc:AT1G64670]	3.7201	-1.13535
AT1G56060	gene:AT1G56060	unknown protein; BEST Arabidopsis thaliana protein match is: unknown protein (TAIR:AT2G32210.1); Has 180 Blast hits to 180 proteins in 22 species: Archae - 0; Bacteria - 0; Metazoa - 0; Fungi - 10; Plants - 170; Viruses - 0; Other Eukaryotes - 0 (so /.../NCBI BLink). [Source:TAIR;Acc:AT1G56060]	3.6746	1.14675
AT1G35210	gene:AT1G35210	Uncharacterized protein T32G9.25 [Source:UniProtKB/TrEMBL;Acc:Q9C6F2]	3.6279	1.54887
AT4G21903	gene:AT4G21903	Protein DETOXIFICATION [Source:UniProtKB/TrEMBL;Acc:F4JKB8]	3.5753	1.70688
AT3G22160	VQ22	VQ motif-containing protein 22 [Source:UniProtKB/Swiss-Prot;Acc:Q9LIE6]	3.5256	1.16362
AT5G11920	CWINV6	Beta-fructofuranosidase, insoluble isoenzyme CWINV6 [Source:UniProtKB/Swiss-Prot;Acc:Q8W4S6]	3.4861	2.02809
AT1G14170	gene:AT1G14170	F7A19.25 protein [Source:UniProtKB/TrEMBL;Acc:Q9XI71]	3.4649	1.13752
AT1G72060	gene:AT1G72060	Serine-type endopeptidase inhibitor [Source:UniProtKB/TrEMBL;Acc:Q9C7G9]	3.3705	1.42002
AT5G26920	CBP60G	Calmodulin-binding protein 60 G [Source:UniProtKB/Swiss-Prot;Acc:F4K2R6]	3.2863	2.07506
AT2G30770	CYP71A13	Indoleacetaldoxime dehydratase [Source:UniProtKB/Swiss-Prot;Acc:O49342]	3.2208	1.12554
AT5G27420	ATL31	E3 ubiquitin-protein ligase ATL31 [Source:UniProtKB/Swiss-Prot;Acc:Q8LGA5]	3.2181	1.97194
AT1G66090	gene:AT1G66090	Disease resistance protein (TIR-NBS class) [Source:UniProtKB/TrEMBL;Acc:Q9C515]	3.1874	1.53112
AT2G27660	gene:AT2G27660	Cysteine/Histidine-rich C1 domain family protein [Source:UniProtKB/TrEMBL;Acc:Q9ZUW8]	3.1453	2.45058
AT3G51860	CAX3	Vacuolar cation/proton exchanger [Source:UniProtKB/TrEMBL;Acc:A0A1I9LSS9]	3.0946	1.16162
AT3G25010	AtRLP41	Receptor like protein 41 [Source:UniProtKB/TrEMBL;Acc:A0A1I9LTP5]	3.0936	1.36357
AT1G51890	gene:AT1G51890	Leucine-rich repeat protein kinase family protein [Source:TAIR;Acc:AT1G51890]	3.0384	2.37766
AT5G61250	AtGUS1	GUS1 [Source:UniProtKB/TrEMBL;Acc:A0A384LHC0]	3.0347	1.10844
AT5G24200	gene:AT5G24200	alpha/beta-Hydrolases superfamily protein [Source:TAIR;Acc:AT5G24200]	3.0052	1.9744
AT4G27860	gene:AT4G27860	vacuolar iron transporter (VIT) family protein [Source:TAIR;Acc:AT4G27860]	2.9807	1.05365
AT1G08050	gene:AT1G08050	T6D22.13 [Source:UniProtKB/TrEMBL;Acc:Q9LN03]	2.9719	1.37134
AT1G66960	gene:AT1G66960	Terpenoid cyclases family protein [Source:TAIR;Acc:AT1G66960]	2.9696	2.11313
AT5G40240	gene:AT5G40240	WAT1-related protein [Source:UniProtKB/TrEMBL;Acc:F4KHA9]	2.9605	1.16914
AT4G39830	gene:AT4G39830	At4g39830 [Source:UniProtKB/TrEMBL;Acc:O65670]	2.953	2.28548
AT2G25000	WRKY60	Probable WRKY transcription factor 60 [Source:UniProtKB/Swiss-Prot;Acc:Q9SK33]	2.9484	1.3519
AT3G28510	gene:AT3G28510	AAA-ATPase At3g28510 [Source:UniProtKB/Swiss-Prot;Acc:Q9LH84]	2.9174	2.97047
AT3G50770	CML41	Probable calcium-binding protein CML41 [Source:UniProtKB/Swiss-Prot;Acc:Q8L3R2]	2.9167	2.54385
AT2G14610	PR1	Pathogenesis-related protein 1 [Source:UniProtKB/Swiss-Prot;Acc:P33154]	2.9057	3.23446
AT1G65690	NHL6	NDR1/HIN1-like protein 6 [Source:UniProtKB/Swiss-Prot;Acc:Q8LD98]	2.8919	2.43736
AT3G61198	#N/A		2.8908	1.84487
AT4G23150	CRK7_2		2.8525	1.1749
AT5G38900	gene:AT5G38900	Thioredoxin superfamily protein [Source:TAIR;Acc:AT5G38900]	2.8429	2.12236
AT1G24140	3MMP	Metalloendoproteinase 3-MMP [Source:UniProtKB/Swiss-Prot;Acc:Q5XF51]	2.839	1.32243
AT3G01830	CML40	Probable calcium-binding protein CML40 [Source:UniProtKB/Swiss-Prot;Acc:Q9SGI8]	2.7929	1.45114
AT5G50200	NRT3.1	High-affinity nitrate transporter 3.1 [Source:UniProtKB/Swiss-Prot;Acc:Q9FGS5]	2.7395	1.14942
AT3G21080	gene:AT3G21080	ABC transporter-like protein [Source:UniProtKB/TrEMBL;Acc:Q9LJC4]	2.7372	1.86145
AT1G75170	gene:AT1G75170	Sec14p-like phosphatidylinositol transfer family protein [Source:UniProtKB/TrEMBL;Acc:Q9FRK8]	2.7159	1.10299
AT5G20230	BCB	SAG14 [Source:UniProtKB/TrEMBL;Acc:A0A178UM84]	2.7129	2.54183
AT4G04490	CRK36	Cysteine-rich receptor-like protein kinase 36 [Source:UniProtKB/Swiss-Prot;Acc:Q9XEC6]	2.6819	1.09214
AT3G28890	AtRLP43	Receptor-like protein 43 [Source:UniProtKB/Swiss-Prot;Acc:Q9LJW7]	2.6728	1.27496
AT5G08240	gene:AT5G08240	At5g08240 [Source:UniProtKB/TrEMBL;Acc:Q9LEY3]	2.6658	1.05913
AT1G64170	CHX16	Cation/H(+) antiporter 16 [Source:UniProtKB/Swiss-Prot;Acc:Q1HDT3]	2.6398	1.26408
AT5G39670	CML46	Probable calcium-binding protein CML46 [Source:UniProtKB/Swiss-Prot;Acc:Q93Z27]	2.627	1.5092
AT1G56120	gene:AT1G56120	Leucine-rich repeat transmembrane protein kinase [Source:UniProtKB/TrEMBL;Acc:F4I3K0]	2.625	1.05675
AT2G45220	PME17	Probable pectinesterase/pectinesterase inhibitor 17 [Source:UniProtKB/Swiss-Prot;Acc:O22149]	2.5971	2.18768
AT2G46400	WRKY46	Probable WRKY transcription factor 46 [Source:UniProtKB/Swiss-Prot;Acc:Q9SKD9]	2.5638	1.24609
AT1G61420	gene:AT1G61420	S-locus lectin protein kinase family protein [Source:TAIR;Acc:AT1G61420]	2.5608	1.06203
AT5G59820	ZAT12	Zinc finger protein ZAT12 [Source:UniProtKB/Swiss-Prot;Acc:Q42410]	2.5245	1.18788
AT5G67340	PUB2	U-box domain-containing protein 2 [Source:UniProtKB/Swiss-Prot;Acc:Q5XEZ8]	2.4801	1.24464
AT5G25930	gene:AT5G25930	Kinase family with leucine-rich repeat domain-containing protein [Source:UniProtKB/TrEMBL;Acc:Q9XGZ2]	2.4704	1.01156
AT1G74590	GSTU10	Glutathione S-transferase U10 [Source:UniProtKB/Swiss-Prot;Acc:Q9CA57]	2.4642	2.01637
AT5G20960	AAO1	Indole-3-acetaldehyde oxidase [Source:UniProtKB/Swiss-Prot;Acc:Q7G193]	2.4459	1.42869
AT5G25250	FLOT1	Flotillin-like protein 1 [Source:UniProtKB/Swiss-Prot;Acc:Q501E6]	2.4153	1.67025
AT4G39030	EDS5	Protein DETOXIFICATION 47, chloroplastic [Source:UniProtKB/Swiss-Prot;Acc:Q945F0]	2.4105	1.52063
AT3G09940	MDAR3	Monodehydroascorbate reductase 3 [Source:UniProtKB/Swiss-Prot;Acc:Q9SR59]	2.3839	1.19724
AT4G10500	DLO1	Protein DMR6-LIKE OXYGENASE 1 [Source:UniProtKB/Swiss-Prot;Acc:Q9ZSA8]	2.3661	1.1518
AT2G29350	SAG13	SAG13 [Source:UniProtKB/TrEMBL;Acc:A0A178VTS8]	2.352	2.42365
AT1G05300	ZIP5	Zinc transporter 5 [Source:UniProtKB/Swiss-Prot;Acc:O23039]	2.3469	1.46465
AT2G04450	NUDT6	Nudix hydrolase 6 [Source:UniProtKB/Swiss-Prot;Acc:Q9SJC4]	2.3358	2.17771
AT5G46050	NPF5.2	Protein NRT1/ PTR FAMILY 5.2 [Source:UniProtKB/Swiss-Prot;Acc:Q9FNL7]	2.3352	2.19493
AT1G33960	AIG1	P-loop containing nucleoside triphosphate hydrolases superfamily protein [Source:TAIR;Acc:AT1G33960]	2.2929	1.95182
AT1G21240	WAK3	Wall-associated receptor kinase 3 [Source:UniProtKB/Swiss-Prot;Acc:Q9LMN8]	2.2867	2.05779
AT3G25600	CML16	Probable calcium-binding protein CML16 [Source:UniProtKB/Swiss-Prot;Acc:Q9LI84]	2.2766	1.29492
AT5G52760	HIPP14	Heavy metal-associated isoprenylated plant protein 14 [Source:UniProtKB/Swiss-Prot;Acc:Q9LTE1]	2.2421	1.73779
AT4G12290	gene:AT4G12290	Amine oxidase [Source:UniProtKB/TrEMBL;Acc:Q8L742]	2.2421	1.20928
AT2G27310	gene:AT2G27310	F-box protein At2g27310 [Source:UniProtKB/Swiss-Prot;Acc:Q9XIN8]	2.2113	1.10684
AT1G51800	IOS1	LRR receptor-like serine/threonine-protein kinase IOS1 [Source:UniProtKB/Swiss-Prot;Acc:Q9C8I6]	2.169	1.54423
AT1G59590	ZCF37	At1g59590 [Source:UniProtKB/TrEMBL;Acc:Q9SLT9]	2.155	1.1002
AT2G43570	CHI	CHI [Source:UniProtKB/TrEMBL;Acc:A0A178W3M3]	2.1075	1.67675
AT5G37600	GLN1-1	Glutamine synthetase cytosolic isozyme 1-1 [Source:UniProtKB/Swiss-Prot;Acc:Q56WN1]	2.1027	1.34279
AT5G23660	SWEET12	Bidirectional sugar transporter SWEET12 [Source:UniProtKB/Swiss-Prot;Acc:O82587]	2.0673	1.9618
AT2G37130	PER21	Peroxidase 21 [Source:UniProtKB/Swiss-Prot;Acc:Q42580]	2.0267	1.02514
AT1G21310	EXT3	Extensin-3 [Source:UniProtKB/Swiss-Prot;Acc:Q9FS16]	2.0159	2.64038
AT1G03850	gene:AT1G03850	Glutaredoxin family protein [Source:TAIR;Acc:AT1G03850]	2.0125	1.60558
AT1G19250	FMO1	Probable flavin-containing monooxygenase 1 [Source:UniProtKB/Swiss-Prot;Acc:Q9LMA1]	1.9866	1.79109
AT1G43910	gene:AT1G43910	AAA-ATPase At1g43910 [Source:UniProtKB/Swiss-Prot;Acc:Q9LP11]	1.9837	1.37115
AT1G19020	gene:AT1G19020	CDP-diacylglycerol-glycerol-3-phosphate 3-phosphatidyltransferase [Source:UniProtKB/TrEMBL;Acc:Q8VYY6]	1.9758	1.47502
AT3G22600	gene:AT3G22600	AT3g22600/F16J14_17 [Source:UniProtKB/TrEMBL;Acc:Q9LJ86]	1.9707	1.19503
AT3G15536	#N/A		1.9359	1.44484
AT3G13950	gene:AT3G13950	AT3G13950 protein [Source:UniProtKB/TrEMBL;Acc:B9DG91]	1.9233	2.54581
AT4G31800	WRKY18	WRKY like transcription factor [Source:UniProtKB/TrEMBL;Acc:Q0WTZ3]	1.9018	2.00753
AT1G02930	GSTF6	Glutathione S-transferase F6 [Source:UniProtKB/Swiss-Prot;Acc:P42760]	1.8881	1.77823
AT2G18690	gene:AT2G18690	Expressed protein [Source:UniProtKB/TrEMBL;Acc:Q9ZV49]	1.8465	1.96178
AT4G14365	XBAT34	Putative E3 ubiquitin-protein ligase XBAT34 [Source:UniProtKB/Swiss-Prot;Acc:Q9FPH0]	1.845	1.4849
AT4G11890	gene:AT4G11890	Protein kinase superfamily protein [Source:UniProtKB/TrEMBL;Acc:F4JPT7]	1.765	1.17895
AT3G52400	SYP122	Syntaxin-122 [Source:UniProtKB/Swiss-Prot;Acc:Q9SVC2]	1.717	1.26234
AT3G57240	BG3	Probable glucan endo-1,3-beta-glucosidase BG3 [Source:UniProtKB/Swiss-Prot;Acc:F4J270]	1.6995	2.17762
AT1G14880	PCR1	Protein PLANT CADMIUM RESISTANCE 1 [Source:UniProtKB/Swiss-Prot;Acc:Q9LQU2]	1.6841	1.36504
AT1G73805	SARD1	Protein SAR DEFICIENT 1 [Source:UniProtKB/Swiss-Prot;Acc:Q9C9T2]	1.6827	1.64052
AT1G35230	AGP5	Classical arabinogalactan protein 5 [Source:UniProtKB/Swiss-Prot;Acc:Q8LCE4]	1.6676	1.86514
AT5G44568	gene:AT5G44568	Transmembrane protein [Source:UniProtKB/TrEMBL;Acc:Q570K8]	1.6513	2.10116
AT3G49120	PER34	Peroxidase 34 [Source:UniProtKB/Swiss-Prot;Acc:Q9SMU8]	1.6281	1.29165
AT1G02920	GSTF7	Glutathione S-transferase F7 [Source:UniProtKB/Swiss-Prot;Acc:Q9SRY5]	1.6055	1.69245
AT2G26440	PME12	Probable pectinesterase/pectinesterase inhibitor 12 [Source:UniProtKB/Swiss-Prot;Acc:O48711]	1.5851	1.396
AT5G48380	BIR1	Probably inactive leucine-rich repeat receptor-like protein kinase At5g48380 [Source:UniProtKB/Swiss-Prot;Acc:Q9ASS4]	1.5741	1.03305
AT5G10760	AED1	Aspartyl protease AED1 [Source:UniProtKB/Swiss-Prot;Acc:Q9LEW3]	1.5599	1.33851
AT1G13470	gene:AT1G13470	Protein of unknown function (DUF1262) [Source:TAIR;Acc:AT1G13470]	1.5475	1.55651
AT3G57260	BGL2	Beta-1,3-glucanase 2 [Source:UniProtKB/TrEMBL;Acc:A0A1I9LMG6]	1.5316	1.19832
AT5G06320	NHL3	NHL3 [Source:UniProtKB/TrEMBL;Acc:A0A178UB58]	1.3682	1.18553
AT2G17040	NAC36	NAC domain containing protein 36 [Source:UniProtKB/TrEMBL;Acc:F4IME8]	1.3681	1.78342
AT2G41100	CML12	Calmodulin-like protein 12 [Source:UniProtKB/Swiss-Prot;Acc:P25071]	1.3551	1.31471
AT5G26340	STP13	STP13 [Source:UniProtKB/TrEMBL;Acc:A0A178UHA7]	1.313	1.02419
AT5G42050	gene:AT5G42050	DCD (Development and Cell Death) domain protein [Source:UniProtKB/TrEMBL;Acc:Q8RXN8]	1.2884	1.00631
AT2G44290	YLS3	Protein YLS3 [Source:UniProtKB/Swiss-Prot;Acc:O64864]	1.2773	1.09164
AT3G01290	HIR3	HIR2 [Source:UniProtKB/TrEMBL;Acc:A0A178V7M0]	1.2709	1.50054
AT4G02520	GSTF2	Glutathione S-transferase F2 [Source:UniProtKB/Swiss-Prot;Acc:P46422]	1.0337	1.53602
AT5G03760	CSLA9	Glucomannan 4-beta-mannosyltransferase 9 [Source:UniProtKB/Swiss-Prot;Acc:Q9LZR3]	-1.0174	-1.46483
AT3G05900	gene:AT3G05900	Neurofilament protein-like protein [Source:UniProtKB/TrEMBL;Acc:F4J9K9]	-1.0323	-1.19131
AT4G37800	XTH7	Probable xyloglucan endotransglucosylase/hydrolase protein 7 [Source:UniProtKB/Swiss-Prot;Acc:Q8LER3]	-1.0444	-1.87437
AT3G10940	LSF2	Phosphoglucan phosphatase LSF2, chloroplastic [Source:UniProtKB/Swiss-Prot;Acc:Q9SRK5]	-1.1894	-1.26674
AT4G36360	BGAL3	Beta-galactosidase 3 [Source:UniProtKB/Swiss-Prot;Acc:Q9SCV9]	-1.273	-1.01295
AT3G02380	COL2	Zinc finger protein CONSTANS-LIKE 2 [Source:UniProtKB/Swiss-Prot;Acc:Q96502]	-1.2947	-1.66667
AT5G20270	HHP1	Heptahelical transmembrane protein 1 [Source:UniProtKB/Swiss-Prot;Acc:Q93ZH9]	-1.3566	-1.63624
AT3G60290	gene:AT3G60290	2-oxoglutarate (2OG) and Fe(II)-dependent oxygenase superfamily protein [Source:UniProtKB/TrEMBL;Acc:F4JAP7]	-1.3976	-1.59521
AT5G45280	PAE11	Pectin acetylesterase 11 [Source:UniProtKB/Swiss-Prot;Acc:Q9FH82]	-1.4344	-1.13271
AT3G14770	SWEET2	Bidirectional sugar transporter SWEET [Source:UniProtKB/TrEMBL;Acc:A0A178VM79]	-1.4367	-1.26984
AT5G66580	gene:AT5G66580	Uncharacterized protein At5g66580 [Source:UniProtKB/TrEMBL;Acc:Q9FJY2]	-1.4666	-1.37728
AT1G10370	GSTU17	Glutathione S-transferase U17 [Source:UniProtKB/Swiss-Prot;Acc:Q9FUS8]	-1.4781	-1.83165
AT3G52360	gene:AT3G52360	Transmembrane protein [Source:UniProtKB/TrEMBL;Acc:Q9FT46]	-1.5158	-1.48431
AT5G65730	XTH6	Xyloglucan endotransglucosylase/hydrolase [Source:UniProtKB/TrEMBL;Acc:Q0WUU2]	-1.6239	-2.53722
AT4G12970	EPFL9	EPIDERMAL PATTERNING FACTOR-like protein 9 [Source:UniProtKB/Swiss-Prot;Acc:Q9SV72]	-1.6278	-1.44369
AT2G37640	EXPA3	Expansin [Source:UniProtKB/TrEMBL;Acc:A0A178VPK3]	-1.6341	-1.18214
AT1G69523	gene:AT1G69523	At1g69520/F10D13_17 [Source:UniProtKB/TrEMBL;Acc:Q941B1]	-1.6411	-1.01986
AT2G27130	XYP11	Xylogen-like protein 11 [Source:UniProtKB/Swiss-Prot;Acc:Q9ZVC7]	-1.85	-1.01283
AT1G29460	gene:AT1G29460	SAUR-like auxin-responsive protein family [Source:TAIR;Acc:AT1G29460]	-1.8927	-1.21007
AT3G44990	XTH31	Xyloglucan endotransglucosylase/hydrolase protein 31 [Source:UniProtKB/Swiss-Prot;Acc:P93046]	-1.9463	-1.31313
AT2G06850	XTH4	Xyloglucan endotransglucosylase/hydrolase protein 4 [Source:UniProtKB/Swiss-Prot;Acc:Q39099]	-1.9779	-1.35896
AT1G29510	SAUR67	Auxin-responsive protein SAUR67 [Source:UniProtKB/Swiss-Prot;Acc:F4I1I4]	-2.0589	-1.56482
AT1G32900	GBSS1	Granule-bound starch synthase 1, chloroplastic/amyloplastic [Source:UniProtKB/Swiss-Prot;Acc:Q9MAQ0]	-2.2114	-1.67257
AT1G25400	gene:AT1G25400	At1g25400 [Source:UniProtKB/TrEMBL;Acc:Q9C6L0]	-2.3616	1.07423
AT2G28500	LBD11	LOB domain-containing protein 11 [Source:UniProtKB/Swiss-Prot;Acc:Q9SK08]	-3.0969	1.38374
AT2G41312	#N/A		-3.1412	-1.26576
AT2G34490	CYP710A2	Cytochrome P450 710A2 [Source:UniProtKB/Swiss-Prot;Acc:O64698]	-3.1905	-1.02423
AT5G18060	SAUR23	SAUR23 [Source:UniProtKB/TrEMBL;Acc:A0A178UM65]	-3.287	-1.1164
AT3G49340	gene:AT3G49340	Cysteine protease-like protein [Source:UniProtKB/TrEMBL;Acc:Q9SG15]	-4.3305	-1.48039
AT3G25670	gene:AT3G25670	Leucine-rich repeat (LRR) family protein [Source:UniProtKB/TrEMBL;Acc:F4JA38]	-4.3414	-1.11594
AT5G36910	THI2.2	At5g36910 [Source:UniProtKB/TrEMBL;Acc:A6QRC1]	-4.8935	-1.87514
AT1G04220	KCS2	3-ketoacyl-CoA synthase 2 [Source:UniProtKB/Swiss-Prot;Acc:Q5XEP9]	-8.2683	-1.42838

## Sheet: Table S7
SI Appendix Tables S7 Primers used for plasmids construction
Gene	Primer sequence	Purpose
NAC90-F	TTCAGAggtctcTctcgATGGCCGATGAGGTCACAATCG	For NAC90 overexpression
NAC90-R	AGCGTGggtctcTgactccAGGCCAAGTCAGCTGTTCCCA	For NAC90 overexpression
3×Flag-F	AGCGTGggtctcGagtcggtaccATGGACTACAAA	For NAC90 overexpression
3×Flag-R	AGCGTGggtctcGaccgGAGCTCTTACTTATCGTC	For NAC90 overexpression
NAC61-gRT1	TGGCATTTCCTCCACCAAGCgttttagagctagaaat	For NAC61 CRISPR
NAC61-AtU3bT1	GCTTGGTGGAGGAAATGCCATgaccaatgttgctcc	For NAC61 CRISPR
NAC61-gRT2	CACCTCTCTCCCGCAAGATTgttttagagctagaaat	For NAC61 CRISPR
NAC61-AtU3bT2	AATCTTGCGGGAGAGAGGTGTgaccaatggtgctttg	For NAC61 CRISPR
NAC36-gRT1	AAGCTCTTCCTCAGTCGGGgttttagagctagaaat	For NAC36 CRISPR
NAC36-AtU6-1T1	CCCGACTGAGGAAGAGCTTCaatcactacttcgtct	For NAC36 CRISPR
NAC36-gRT2	CGAGAATCGGGGAGAGGGAAgttttagagctagaaat	For NAC36 CRISPR
NAC36-AtU6-29T2	TTCCCTCTCCCCGATTCTCGCaatctcttagtcgact	For NAC36 CRISPR
SARD1-F	tgtttttatgaattttgcagATGGCAGGGAAGAGGTTATTTC	For dual luciferase promoter activity assays
SARD1-R	accagacaaccacaacaagcTTAGAAAGGGTTTATATGAT	For dual luciferase promoter activity assays
CBP60g-F	tgtttttatgaattttgcagATGAAGATTCGGAACAGCCC	For dual luciferase promoter activity assays
CBP60g-R	accagacaaccacaacaagcTTACAAGCCTTCCCTCGGATTTCT	For dual luciferase promoter activity assays
NAC90pro-F	ATGATTACGAATTCGAGCTCGAAGTCTACGGATTGTCGGGTTG	For dual luciferase promoter activity assays
NAC90pro-R	ATGTTTTTGGCGTCTTCCATTTTTGTACGATATTTTTAACAAC	For dual luciferase promoter activity assays
ALD1pro-F	ATGATTACGAATTCGAGCTCGAGAACGGAAGGAGTATTAAGTG	For dual luciferase promoter activity assays
ALD1pro-F	ATGTTTTTGGCGTCTTCCATTCTTTACTTGCAAGTTATGACGG	For dual luciferase promoter activity assays
SARD4pro-F	ATGATTACGAATTCGAGCTCGGACAAGAGGACTGGATAGTAGAG	For dual luciferase promoter activity assays
SARD4pro-F	ATGTTTTTGGCGTCTTCCATTGAATTTTGAGAGATTCATTG	For dual luciferase promoter activity assays
FMO1pro-F	ATGATTACGAATTCGAGCTCGAAGATTCTCCACATTCACGAC	For dual luciferase promoter activity assays
FMO1pro-F	ATGTTTTTGGCGTCTTCCATCTGAGAGAGGTTATGCTAGAG	For dual luciferase promoter activity assays
ICS1pro-F	ATGATTACGAATTCGAGCTCAATTATCCACGCTTTGTCACAC	For dual luciferase promoter activity assays
ICS1pro-F	ATGTTTTTGGCGTCTTCCATTGCAGAAATTCGTAAAGTGTT	For dual luciferase promoter activity assays
ALD1-qPCR-F	GTGCAAGATCCTACCTTCCCGGC	For gene expression analysis
ALD1-qPCR-R	CGGTCCTTGGGGTCATAGCCAGA	For gene expression analysis
SARD4-qPCR-F	GTGTTTAAGTCCGTCGGTTCG	For gene expression analysis
SARD4-qPCR-R	AACGGCTGAGGTAAGTCTCG	For gene expression analysis
FMO1-qPCR-F	GTTCGTGGTTGTGTGTACCG	For gene expression analysis
FMO1-qPCR-R	TGTGCAAGCTTTTCCTCCTT	For gene expression analysis
PR1-qPCR-F	GTGCTCTTGTTCTTCCCTCG	For gene expression analysis
PR1-qPCR-R	GCCTGGTTGTGAACCCTTAG	For gene expression analysis
ACTIN1-qPCR-F	CGATGAAGCTCAATCCAAACGA	For gene expression analysis
ACTIN1-qPCR-R	CAGAGTCGAGCACAATACCG	For gene expression analysis
NAC90-qPCR-F	CGCTTCCACAATCCCTAAGCTG	For gene expression analysis
NAC90-qPCR-R	TGTCTCAGCTACTGCAACATCAC	For gene expression analysis
NAC61-qPCR-F	TTGAGCCTACTCAGCTTCCAAATC	For gene expression analysis
NAC61-qPCR-R	ACCAGTGGTCCTACTTGGTCTG	For gene expression analysis
NAC36-qPCR-F	CCATGGGACTTACCTGGTTTATCG	For gene expression analysis
[truncated: 31 more rows]
